# Supplementary material for: Response to Fingolimod in Multiple Sclerosis Patients Is Associated with a Differential Transcriptomic Regulation
Source: MDPI journal article supplement (doi:10.3390/ijms25031372), 2024-01-23
Supplement: s1 [file s1]

**Table S1. Baseline demographic characteristics of each healthy donor (HD)**

| Healthy donor | Sex    | Age |
|---------------|--------|-----|
| HD_1          | Male   | 60  |
| HD_2          | Female | 35  |
| HD_3          | Female | 32  |
| HD_4          | Female | 43  |
| HD_5          | Female | 30  |
| HD_6          | Male   | 58  |
| HD_7          | Male   | 47  |
| HD_8          | Female | 42  |
| HD_9          | Female | 51  |
| HD_10         | Female | 35  |
