# Supplementary material for: Response to Fingolimod in Multiple Sclerosis Patients Is Associated with a Differential Transcriptomic Regulation
Source: MDPI journal article supplement (doi:10.3390/ijms25031372), 2024-01-23
Supplement: s1 [file s1]

**Table S2. Baseline demographic and clinical characteristics of each multiple sclerosis patient**

| MS patient  | Sex    | Age | Disease duration (years) <sup>1</sup> | Time since DMT onset (years) | Nº of previous DMTs | Immediately previous DMT | EDSS |
|-------------|--------|-----|---------------------------------------|------------------------------|---------------------|--------------------------|------|
| Responder_1 | Female | 25  | 4.6                                   | 0.6                          | 1                   | Interferon beta          | 0    |
| Responder_2 | Female | 42  | 14.8                                  | 5.6                          | 2                   | Natalizumab              | 5.5  |
| Responder_3 | Male   | 49  | 3.1                                   | 2.4                          | 1                   | Dimethyl fumarate        | 0    |
| Responder_4 | Male   | 56  | 6.8                                   | 2.2                          | 1                   | Natalizumab              | 3.5  |
| Responder_5 | Male   | 28  | 2.3                                   | 2.0                          | 1                   | Natalizumab              | 1.5  |

|                |        |    |      |      |   |                   |     |
|----------------|--------|----|------|------|---|-------------------|-----|
| NonResponder_1 | Female | 32 | 14.0 | 13.0 | 3 | Natalizumab       | 2.5 |
| NonResponder_2 | Female | 36 | 0.8  | 0.7  | 1 | Natalizumab       | 0   |
| NonResponder_3 | Male   | 37 | 10.0 | 0.7  | 1 | Interferon beta   | 2   |
| NonResponder_4 | Female | 42 | 4.0  | 3.9  | 2 | Natalizumab       | 1   |
| NonResponder_5 | Female | 20 | 3.2  | 2.8  | 1 | Dimethyl fumarate | 0   |

<sup>1</sup>Time since the first symptoms of multiple sclerosis (MS)

DMT, disease-modifying treatment; EDSS, expanded disability status scale
