# Supplementary material for: Response to Fingolimod in Multiple Sclerosis Patients Is Associated with a Differential Transcriptomic Regulation
Source: Int J Mol Sci. 2024 Jan 23;25(3):1372. doi: 10.3390/ijms25031372 (PMC10855583; doi:10.3390/ijms25031372)
Supplement: Supplementary file 1 [file ijms-25-01372-s001.zip › SUPPLEMENTARY_FILE_TABLES_S3_TO_S13.xlsx]

## Sheet: TABLE_S3
Table S3. Differentially expressed genes in multiple sclerosis patients at baseline compared to healthy donors
Ensembl ID	Gene symbol	log2FC	pval	padj	lfcSE
ENSG00000228253	MT-ATP8	-3.32188	3.71733e-122	6.80421e-118	0.141947
ENSG00000101084	RAB5IF	3.49333	1.07773e-90	9.86337e-87	0.174679
ENSG00000130748	TMEM160	3.29948	1.79592e-70	1.09575e-66	0.189895
ENSG00000168040	FADD	2.80769	4.13945e-69	1.89421e-65	0.162177
ENSG00000102931	ARL2BP	4.13439	4.56965e-68	1.67286e-64	0.241274
ENSG00000166337	TAF10	0.990154	1.16688e-62	3.55975e-59	0.059731
ENSG00000167136	ENDOG	3.6223	5.89076e-61	1.54035e-57	0.222959
ENSG00000179965	ZNF771	1.80689	1.65022e-60	3.7757e-57	0.11125
ENSG00000243449	C4orf48	4.0797	1.27544e-56	2.59397e-53	0.266932
ENSG00000272325	NUDT3	4.25673	8.88519e-55	1.62635e-51	0.280083
ENSG00000239857	GET4	2.05655	2.88801e-54	4.80566e-51	0.134249
ENSG00000135766	EGLN1	2.34516	1.49432e-51	2.27934e-48	0.157472
ENSG00000141933	TPGS1	2.06668	2.78869e-51	3.92648e-48	0.139282
ENSG00000099624	ATP5F1D	1.67619	4.18815e-51	5.47571e-48	0.113224
ENSG00000168350	DEGS2	2.55382	7.66607e-51	9.35465e-48	0.172185
ENSG00000271303	SRXN1	5.97001	7.70866e-50	8.81871e-47	0.408958
ENSG00000241360	PDXP	3.74197	4.52187e-47	4.86872e-44	0.26459
ENSG00000131116	ZNF428	1.81641	7.30986e-46	7.43332e-43	0.129884
ENSG00000182154	MRPL41	1.93571	8.33689e-46	8.03149e-43	0.138618
ENSG00000164754	RAD21	-0.419114	2.8912e-41	2.64602e-38	0.0313052
ENSG00000130522	JUND	1.96075	1.89102e-40	1.64825e-37	0.149755
ENSG00000218891	ZNF579	2.1578	7.23931e-40	5.77598e-37	0.166036
ENSG00000261221	ZNF865	2.11227	7.25784e-40	5.77598e-37	0.163488
ENSG00000165644	COMTD1	1.94446	1.31023e-39	9.9927e-37	0.150302
ENSG00000179922	ZNF784	1.04463	2.98233e-39	2.18354e-36	0.0807723
ENSG00000250479	CHCHD10	2.28594	3.7505e-39	2.64035e-36	0.177983
ENSG00000188486	H2AX	1.50598	5.85202e-39	3.96723e-36	0.117363
ENSG00000185262	UBALD2	1.43765	9.1191e-39	5.96129e-36	0.111957
ENSG00000167996	FTH1	2.51935	2.76342e-38	1.7442e-35	0.198051
ENSG00000104859	CLASRP	0.847677	4.75606e-37	2.90183e-34	0.067543
ENSG00000182325	FBXL6	1.27415	5.71198e-37	3.37265e-34	0.101947
ENSG00000159884	CCDC107	2.53399	1.86258e-36	1.0654e-33	0.205838
ENSG00000161956	SENP3	0.911476	5.01337e-36	2.78075e-33	0.0737949
ENSG00000161999	JMJD8	1.20345	7.27537e-36	3.91672e-33	0.098056
ENSG00000182768	NGRN	1.31626	1.24707e-35	6.52183e-33	0.107531
ENSG00000213563	C8orf82	1.66167	1.37913e-35	7.01209e-33	0.135854
ENSG00000142544	CTU1	2.64245	2.01825e-35	9.98435e-33	0.218768
ENSG00000155508	CNOT8	-0.366637	5.24186e-35	2.52492e-32	0.0297393
ENSG00000177666	PNPLA2	1.04987	1.27563e-34	5.98696e-32	0.0867328
ENSG00000220008	LINGO3	2.61277	2.07988e-34	9.51755e-32	0.219393
ENSG00000107872	FBXL15	2.2197	3.26804e-34	1.45898e-31	0.188183
ENSG00000224877	NDUFAF8	1.35695	1.16606e-33	5.08181e-31	0.114316
ENSG00000179085	DPM3	1.41561	1.63788e-33	6.97205e-31	0.119839
ENSG00000161179	YDJC	1.6072	3.88901e-33	1.61783e-30	0.137548
ENSG00000178951	ZBTB7A	1.30008	7.53353e-33	3.06431e-30	0.111325
ENSG00000233493	TMEM238	3.73059	7.93895e-32	3.15901e-29	0.33242
ENSG00000178015	GPR150	1.79128	9.27162e-32	3.6108e-29	0.155505
ENSG00000196976	LAGE3	1.37645	1.07725e-31	4.10793e-29	0.119809
ENSG00000127554	GFER	1.23406	1.15587e-31	4.31776e-29	0.107641
ENSG00000197483	ZNF628	1.87863	4.40038e-31	1.61089e-28	0.165477
ENSG00000123144	TRIR	1.05825	5.47216e-31	1.96397e-28	0.0924288
ENSG00000103266	STUB1	1.64503	5.60457e-31	1.97281e-28	0.145841
ENSG00000184207	PGP	0.929175	1.46954e-30	5.0752e-28	0.0823922
ENSG00000172780	RAB43	2.54879	2.42274e-30	8.2122e-28	0.228289
ENSG00000130511	SSBP4	1.73544	3.09283e-30	1.02929e-27	0.155855
ENSG00000258429	PDF	4.92939	4.79649e-30	1.56777e-27	0.449938
ENSG00000239264	TXNDC5	3.30519	6.51835e-30	2.09319e-27	0.298055
ENSG00000118007	STAG1	-0.487897	1.45626e-29	4.59576e-27	0.0435164
ENSG00000186222	BLOC1S4	0.985295	3.56939e-29	1.10736e-26	0.0894914
ENSG00000103275	UBE2I	0.550772	3.70786e-29	1.13114e-26	0.0496603
ENSG00000270170	NCBP2AS2	0.911431	7.15531e-29	2.14706e-26	0.0832706
ENSG00000088766	CRLS1	2.14843	9.1804e-29	2.71029e-26	0.199267
ENSG00000142409	ZNF787	1.73831	1.2375e-28	3.59543e-26	0.161382
ENSG00000185950	IRS2	1.22184	1.27935e-28	3.65893e-26	0.112037
ENSG00000133250	ZNF414	1.56529	1.30883e-28	3.68565e-26	0.144683
ENSG00000075292	ZNF638	-0.598394	1.50814e-28	4.18257e-26	0.0548747
ENSG00000178297	TMPRSS9	1.69644	2.05235e-28	5.6069e-26	0.157613
ENSG00000071626	DAZAP1	0.63586	2.58318e-28	6.95332e-26	0.0591172
ENSG00000006015	REX1BD	1.59896	3.10899e-28	8.24738e-26	0.149313
ENSG00000146834	MEPCE	1.47575	5.57901e-28	1.45883e-25	0.137237
ENSG00000112787	FBRSL1	1.43212	5.69464e-28	1.46809e-25	0.134222
ENSG00000143793	C1orf35	1.2489	6.98729e-28	1.77633e-25	0.116802
ENSG00000126453	BCL2L12	0.811017	8.12879e-28	2.03821e-25	0.0754248
ENSG00000065559	MAP2K4	-0.477616	1.13559e-27	2.8089e-25	0.0441434
ENSG00000126895	AVPR2	1.56664	1.7369e-27	4.23896e-25	0.147775
ENSG00000168282	MGAT2	2.92419	5.21817e-27	1.25676e-24	0.280601
ENSG00000178149	DALRD3	0.878938	7.37421e-27	1.75295e-24	0.0834774
ENSG00000261308	FIGNL2	2.49182	8.46872e-27	1.98733e-24	0.238546
ENSG00000260428	SCX	3.12272	1.0388e-26	2.40686e-24	0.307583
ENSG00000205903	ZNF316	1.21136	1.68691e-26	3.85964e-24	0.11666
ENSG00000139725	RHOF	2.56995	2.23943e-26	5.06056e-24	0.251893
ENSG00000172922	RNASEH2C	0.80168	2.3257e-26	5.19142e-24	0.076818
ENSG00000185000	DGAT1	0.892399	2.87007e-26	6.32938e-24	0.0858903
ENSG00000131188	PRR7	2.21495	3.01171e-26	6.56267e-24	0.215281
ENSG00000088247	KHSRP	0.672067	3.43084e-26	7.38801e-24	0.0642504
ENSG00000257704	INAFM1	1.86924	5.22205e-26	1.11145e-23	0.182342
ENSG00000173153	ESRRA	1.2716	5.30984e-26	1.11714e-23	0.123661
ENSG00000213638	ADAT3	2.81044	5.81403e-26	1.20932e-23	0.278721
ENSG00000163702	IL17RC	2.36383	6.31401e-26	1.29856e-23	0.23115
ENSG00000121741	ZMYM2	-0.567061	7.52434e-26	1.53028e-23	0.0548058
ENSG00000114416	FXR1	-0.386678	8.62996e-26	1.73585e-23	0.0373217
ENSG00000160226	CFAP410	1.05119	1.34639e-25	2.67874e-23	0.103025
ENSG00000161682	FAM171A2	2.83939	1.61669e-25	3.18192e-23	0.278947
ENSG00000104866	PPP1R37	1.31406	1.92999e-25	3.75815e-23	0.129783
ENSG00000136463	TACO1	1.46226	2.26093e-25	4.35621e-23	0.144313
ENSG00000006125	AP2B1	-0.347178	3.12322e-25	5.95494e-23	0.0334628
ENSG00000160813	PPP1R35	1.82167	3.25193e-25	6.13642e-23	0.181402
ENSG00000284395	PERCC1	2.29268	4.50919e-25	8.42207e-23	0.227614
ENSG00000163795	ZNF513	0.607329	4.75161e-25	8.7852e-23	0.0595979
ENSG00000115266	APC2	1.34627	4.86996e-25	8.91398e-23	0.13355
ENSG00000127445	PIN1	0.703661	5.2148e-25	9.45066e-23	0.0692262
ENSG00000008323	PLEKHG6	1.86891	7.37072e-25	1.32268e-22	0.18607
ENSG00000179271	GADD45GIP1	1.43833	7.71859e-25	1.37166e-22	0.144107
ENSG00000165804	ZNF219	1.75142	9.4735e-25	1.66734e-22	0.175308
ENSG00000284286	MIR718	10.5967	1.21241e-24	2.11353e-22	2.90499
ENSG00000175756	AURKAIP1	1.26667	1.3342e-24	2.30389e-22	0.127513
ENSG00000188375	H3-5	-1.51793	1.45244e-24	2.48462e-22	0.152294
ENSG00000011304	PTBP1	0.65439	1.8442e-24	3.12558e-22	0.0646005
ENSG00000197961	ZNF121	-0.704193	2.12684e-24	3.57153e-22	0.070223
ENSG00000116014	KISS1R	3.27897	4.60997e-24	7.60188e-22	0.334333
ENSG00000182087	TMEM259	1.1729	4.6056e-24	7.60188e-22	0.119681
ENSG00000007520	TSR3	1.32895	5.67707e-24	9.27796e-22	0.135675
ENSG00000169564	PCBP1	1.80198	6.45538e-24	1.04566e-21	0.184145
ENSG00000179168	GGN	2.02435	7.60422e-24	1.22094e-21	0.206141
ENSG00000178605	GTPBP6	0.954587	7.8637e-24	1.25163e-21	0.0971106
ENSG00000174586	ZNF497	2.00923	9.29627e-24	1.46689e-21	0.20532
ENSG00000213015	ZNF580	0.83119	1.53999e-23	2.40923e-21	0.0843159
ENSG00000167394	ZNF668	1.13154	1.8575e-23	2.88133e-21	0.116135
ENSG00000162959	MEMO1	1.32743	2.19374e-23	3.3743e-21	0.136932
ENSG00000141577	CEP131	1.09257	2.35084e-23	3.58582e-21	0.112596
ENSG00000126461	SCAF1	1.3432	2.43762e-23	3.68745e-21	0.138992
ENSG00000100603	SNW1	-0.376745	2.5078e-23	3.76253e-21	0.0381434
ENSG00000284194	SCO2	3.8977	5.55134e-23	8.26111e-21	0.411389
ENSG00000103254	ANTKMT	2.44925	5.67036e-23	8.30322e-21	0.261308
ENSG00000104325	DECR1	-0.564295	5.63094e-23	8.30322e-21	0.0575878
ENSG00000286264		1.91526	5.7836e-23	8.40183e-21	0.201022
ENSG00000103495	MAZ	1.01169	6.301e-23	9.08138e-21	0.105444
ENSG00000104885	DOT1L	1.41647	9.04689e-23	1.29371e-20	0.148369
ENSG00000188483	IER5L	2.84207	9.37414e-23	1.33011e-20	0.305274
ENSG00000167536	DHRS13	1.29368	9.67455e-23	1.36218e-20	0.13523
ENSG00000257315	ZBED6	1.71335	1.07236e-22	1.49835e-20	0.179626
ENSG00000167969	ECI1	1.05797	1.16952e-22	1.62173e-20	0.110635
ENSG00000131584	ACAP3	1.08934	1.31319e-22	1.80726e-20	0.114447
ENSG00000111775	COX6A1	-0.956179	1.35962e-22	1.8572e-20	0.10011
ENSG00000182979	MTA1	0.967752	2.06013e-22	2.79323e-20	0.101728
ENSG00000158290	CUL4B	-0.469235	2.73967e-22	3.68728e-20	0.0488251
ENSG00000129932	DOHH	1.67124	2.7972e-22	3.73722e-20	0.177856
ENSG00000125652	ALKBH7	1.61952	3.04349e-22	4.03682e-20	0.173614
ENSG00000175602	CCDC85B	2.89497	3.41628e-22	4.49867e-20	0.316337
ENSG00000124486	USP9X	-0.37592	4.06049e-22	5.3088e-20	0.0391499
ENSG00000221869	CEBPD	2.1406	5.22478e-22	6.78258e-20	0.228595
ENSG00000141582	CBX4	1.19571	5.4851e-22	7.07038e-20	0.127627
ENSG00000171813	PWWP2B	1.52453	6.97303e-22	8.92547e-20	0.163875
ENSG00000132005	RFX1	1.1836	7.24278e-22	9.20638e-20	0.126684
ENSG00000102109	PCSK1N	3.42604	7.76891e-22	9.80705e-20	0.376115
ENSG00000181588	MEX3D	1.8028	7.86722e-22	9.86312e-20	0.195891
ENSG00000241837	ATP5PO	-0.682146	7.9275e-22	9.87108e-20	0.0725217
ENSG00000137776	SLTM	-0.327993	8.91438e-22	1.10021e-19	0.0344614
ENSG00000171045	TSNARE1	1.01223	8.95605e-22	1.10021e-19	0.108434
ENSG00000170468	RIOX1	0.873202	1.10898e-21	1.35325e-19	0.0931799
ENSG00000171443	ZNF524	1.35298	1.19942e-21	1.45391e-19	0.146156
ENSG00000105698	USF2	0.914498	2.23509e-21	2.67732e-19	0.098714
ENSG00000177733	HNRNPA0	0.749968	2.23792e-21	2.67732e-19	0.0802259
ENSG00000115268	RPS15	1.30943	2.51029e-21	2.98366e-19	0.142424
ENSG00000090060	PAPOLA	-0.435707	2.71564e-21	3.20691e-19	0.0462136
ENSG00000070423	RNF126	1.35973	3.22278e-21	3.78139e-19	0.148848
ENSG00000120733	KDM3B	-0.235819	3.26816e-21	3.81022e-19	0.0250552
ENSG00000101844	ATG4A	-0.524104	3.79253e-21	4.39357e-19	0.0562895
ENSG00000173338	KCNK7	1.6108	4.20568e-21	4.84156e-19	0.176774
ENSG00000160972	PPP1R16A	1.63983	4.30866e-21	4.9291e-19	0.179678
ENSG00000063169	BICRA	1.22187	4.41567e-21	4.98916e-19	0.133235
ENSG00000176619	LMNB2	0.949177	4.39544e-21	4.98916e-19	0.103561
ENSG00000244486	SCARF2	1.7938	4.91174e-21	5.51561e-19	0.196819
ENSG00000164329	TENT2	-0.403549	5.1971e-21	5.80047e-19	0.0431241
ENSG00000178093	TSSK6	1.08432	5.52811e-21	6.13252e-19	0.118532
ENSG00000116032	GRIN3B	2.2681	6.30228e-21	6.94921e-19	0.253801
ENSG00000130725	UBE2M	0.950265	8.75054e-21	9.59101e-19	0.104629
ENSG00000105329	TGFB1	0.997728	1.00426e-20	1.09416e-18	0.110117
ENSG00000105662	CRTC1	0.816266	1.13807e-20	1.23262e-18	0.089452
ENSG00000080603	SRCAP	0.74337	1.3089e-20	1.4093e-18	0.0815305
ENSG00000113141	IK	-0.352279	1.49597e-20	1.6013e-18	0.0381353
ENSG00000116544	DLGAP3	1.81045	1.66791e-20	1.76058e-18	0.201647
ENSG00000148832	PAOX	1.97815	1.67363e-20	1.76058e-18	0.220217
ENSG00000152518	ZFP36L2	1.35859	1.66339e-20	1.76058e-18	0.151095
ENSG00000146282	RARS2	-0.505769	2.00331e-20	2.09534e-18	0.0553371
ENSG00000076984	MAP2K7	0.733963	2.18787e-20	2.26775e-18	0.0809342
ENSG00000160949	TONSL	1.05613	2.19292e-20	2.26775e-18	0.117596
ENSG00000012963	UBR7	-0.430839	2.51592e-20	2.58716e-18	0.0472086
ENSG00000100075	SLC25A1	0.933599	2.92856e-20	2.99466e-18	0.103824
ENSG00000164620	RELL2	1.15033	3.07522e-20	3.12716e-18	0.128407
ENSG00000021776	AQR	-0.49522	3.55638e-20	3.55529e-18	0.0545245
ENSG00000123200	ZC3H13	-0.481016	3.56078e-20	3.55529e-18	0.052838
ENSG00000127415	IDUA	1.52894	3.54513e-20	3.55529e-18	0.172272
ENSG00000173141	MRPL57	0.797536	3.57394e-20	3.55529e-18	0.0887217
ENSG00000116906	GNPAT	-0.403404	3.74831e-20	3.7086e-18	0.0443743
ENSG00000149823	VPS51	1.17883	4.20449e-20	4.13758e-18	0.133424
ENSG00000101972	STAG2	-0.424144	4.62647e-20	4.5285e-18	0.0468797
ENSG00000162585	FAAP20	0.869014	4.87466e-20	4.74605e-18	0.0974336
ENSG00000023287	RB1CC1	-0.507006	5.24079e-20	5.07552e-18	0.056115
ENSG00000125107	CNOT1	-0.419236	5.79872e-20	5.5863e-18	0.04623
ENSG00000118564	FBXL5	-0.499368	6.07968e-20	5.82631e-18	0.0553606
ENSG00000108839	ALOX12	0.737247	7.51329e-20	7.16267e-18	0.0826387
ENSG00000026036	RTEL1-TNFRSF6B	0.866506	9.11258e-20	8.64232e-18	0.098015
ENSG00000178950	GAK	0.707349	9.41524e-20	8.88332e-18	0.0795214
ENSG00000197976	AKAP17A	0.808541	1.08723e-19	1.02055e-17	0.0912697
ENSG00000141873	SLC39A3	1.17623	1.11435e-19	1.04066e-17	0.133566
ENSG00000140406	TLNRD1	1.65738	1.162e-19	1.07965e-17	0.191764
ENSG00000127528	KLF2	1.96048	1.32979e-19	1.22932e-17	0.224282
ENSG00000099364	FBXL19	1.23632	1.55934e-19	1.43427e-17	0.141319
ENSG00000136536	MARCHF7	-0.49724	2.06425e-19	1.8892e-17	0.0559565
ENSG00000186352	ANKRD37	1.28007	2.23844e-19	2.03842e-17	0.147175
ENSG00000126777	KTN1	-0.482721	2.35391e-19	2.13297e-17	0.0543889
ENSG00000179698	WDR97	1.19626	2.44734e-19	2.2067e-17	0.137527
ENSG00000143952	VPS54	-0.511801	2.51035e-19	2.25242e-17	0.057959
ENSG00000105229	PIAS4	0.989573	2.58966e-19	2.31225e-17	0.113512
ENSG00000167642	SPINT2	1.5024	2.9588e-19	2.62903e-17	0.174753
ENSG00000167700	MFSD3	1.45945	3.02189e-19	2.67211e-17	0.169824
ENSG00000167302	TEPSIN	0.579642	3.2333e-19	2.8453e-17	0.0658248
ENSG00000197070	ARRDC1	0.73689	3.49131e-19	3.05765e-17	0.0843995
ENSG00000008710	PKD1	1.35761	4.67898e-19	4.07829e-17	0.157681
ENSG00000152700	SAR1B	-0.374317	5.94819e-19	5.15999e-17	0.0424851
ENSG00000119574	ZBTB45	1.13713	6.08278e-19	5.25185e-17	0.132089
ENSG00000276045	ORAI1	0.754743	6.87134e-19	5.90484e-17	0.0872862
ENSG00000152942	RAD17	-0.566703	7.63964e-19	6.53439e-17	0.0650319
ENSG00000173621	LRFN4	2.20554	1.11253e-18	9.47154e-17	0.26249
ENSG00000139218	SCAF11	-0.407295	1.14865e-18	9.73373e-17	0.0466684
ENSG00000070444	MNT	0.625581	1.62043e-18	1.36684e-16	0.0727384
ENSG00000177225	GATD1	0.62996	1.66007e-18	1.39385e-16	0.073405
ENSG00000079313	REXO1	0.933161	1.7485e-18	1.46139e-16	0.109574
ENSG00000139697	SBNO1	-0.364617	1.7759e-18	1.47755e-16	0.041546
ENSG00000221821	C6orf226	0.959413	1.87843e-18	1.55578e-16	0.112843
ENSG00000243147	MRPL33	-0.628126	1.95971e-18	1.61579e-16	0.0731541
ENSG00000138381	ASNSD1	-0.555915	2.10097e-18	1.72449e-16	0.0648018
ENSG00000063245	EPN1	1.00866	2.23123e-18	1.82323e-16	0.119205
ENSG00000162302	RPS6KA4	1.02348	2.35888e-18	1.91897e-16	0.121173
ENSG00000143373	ZNF687	0.41367	2.7723e-18	2.24532e-16	0.0479571
ENSG00000019995	ZRANB1	-0.431531	3.12543e-18	2.52017e-16	0.0500866
ENSG00000153443	UBALD1	1.00932	3.14497e-18	2.52481e-16	0.11992
ENSG00000101940	WDR13	0.723498	3.20366e-18	2.56069e-16	0.0851033
ENSG00000176022	B3GALT6	1.35813	4.23165e-18	3.36766e-16	0.163661
ENSG00000129951	PLPPR3	2.21817	4.39678e-18	3.48392e-16	0.265012
ENSG00000178057	NDUFAF3	0.71527	5.78107e-18	4.56106e-16	0.084811
ENSG00000182149	IST1	-0.236892	5.94646e-18	4.67142e-16	0.0275576
ENSG00000133704	IPO8	-0.34223	6.65435e-18	5.20518e-16	0.0402294
ENSG00000205138	SDHAF1	0.897803	6.72083e-18	5.23481e-16	0.107423
ENSG00000133027	PEMT	1.06489	6.94049e-18	5.36584e-16	0.127536
ENSG00000214022	REPIN1	0.87877	6.94768e-18	5.36584e-16	0.105004
ENSG00000149809	TM7SF2	0.79847	7.17964e-18	5.52168e-16	0.0950826
ENSG00000171222	SCAND1	1.73482	7.50436e-18	5.74727e-16	0.212253
ENSG00000168101	NUDT16L1	0.895145	8.42847e-18	6.40144e-16	0.107663
ENSG00000172366	MCRIP2	1.24618	8.40753e-18	6.40144e-16	0.151299
ENSG00000168569	TMEM223	0.703557	8.6161e-18	6.51691e-16	0.0839359
ENSG00000141867	BRD4	0.511611	1.25301e-17	9.43834e-16	0.0606851
ENSG00000063244	U2AF2	0.518645	1.39581e-17	1.04708e-15	0.0617903
ENSG00000173137	ADCK5	1.00658	1.43366e-17	1.07109e-15	0.122362
ENSG00000118046	STK11	1.07336	1.56692e-17	1.16589e-15	0.131412
ENSG00000101216	GMEB2	0.631551	1.61104e-17	1.19387e-15	0.07545
ENSG00000135940	COX5B	0.817413	1.66371e-17	1.22792e-15	0.0988072
ENSG00000111731	C2CD5	-0.434238	1.70846e-17	1.25589e-15	0.0517064
ENSG00000213445	SIPA1	1.12162	1.72008e-17	1.25937e-15	0.136797
ENSG00000105254	TBCB	0.566583	1.8339e-17	1.33736e-15	0.0676396
ENSG00000103260	METRN	1.23572	1.8679e-17	1.35675e-15	0.151432
ENSG00000105464	GRIN2D	1.48776	1.94387e-17	1.40634e-15	0.182591
ENSG00000163704	PRRT3	0.941	2.31097e-17	1.66535e-15	0.114642
ENSG00000163655	GMPS	-0.332775	2.34918e-17	1.68625e-15	0.0396124
ENSG00000160256	SLX9	1.19547	2.56532e-17	1.83421e-15	0.146539
ENSG00000133315	MACROD1	1.56854	2.5817e-17	1.83873e-15	0.193277
ENSG00000133275	CSNK1G2	1.07228	2.64695e-17	1.8779e-15	0.131561
ENSG00000085872	CHERP	0.8668	2.9396e-17	2.07747e-15	0.105698
ENSG00000085832	EPS15	-0.553048	3.04164e-17	2.14131e-15	0.0666086
ENSG00000214114	MYCBP	-0.609045	3.24859e-17	2.27825e-15	0.0737398
ENSG00000179588	ZFPM1	1.63142	3.30793e-17	2.31101e-15	0.201802
ENSG00000160113	NR2F6	1.64767	3.46059e-17	2.39934e-15	0.20425
ENSG00000177732	SOX12	1.27851	3.45153e-17	2.39934e-15	0.158306
ENSG00000128513	POT1	-0.541084	3.61309e-17	2.49562e-15	0.0653204
ENSG00000166454	ATMIN	-0.411128	3.86515e-17	2.65969e-15	0.04943
ENSG00000125901	MRPS26	1.08996	4.07598e-17	2.79426e-15	0.134566
ENSG00000172216	CEBPB	2.46535	4.47285e-17	3.05489e-15	0.311842
ENSG00000214435	AS3MT	4.36679	4.53368e-17	3.08492e-15	0.531497
ENSG00000183971	NPW	4.07831	4.6511e-17	3.1531e-15	0.506374
ENSG00000136628	EPRS1	-0.461434	4.86629e-17	3.28681e-15	0.0559099
ENSG00000180900	SCRIB	1.29073	4.93095e-17	3.31824e-15	0.159849
ENSG00000087206	UIMC1	-0.409094	5.36665e-17	3.5864e-15	0.0496515
ENSG00000133265	HSPBP1	1.14641	5.36863e-17	3.5864e-15	0.142211
ENSG00000130382	MLLT1	0.716031	5.81287e-17	3.86904e-15	0.0878019
ENSG00000081721	DUSP12	-0.540901	6.10755e-17	4.05046e-15	0.0658568
ENSG00000114631	PODXL2	1.22318	6.20742e-17	4.10182e-15	0.152347
ENSG00000125656	CLPP	0.836291	6.71277e-17	4.4198e-15	0.103324
ENSG00000182095	TNRC18	1.25774	7.05135e-17	4.62609e-15	0.156875
ENSG00000141503	MINK1	0.59908	7.2625e-17	4.7476e-15	0.0732485
ENSG00000163714	U2SURP	-0.401116	7.315e-17	4.7649e-15	0.0486489
ENSG00000153187	HNRNPU	-0.353496	7.52948e-17	4.88722e-15	0.0427792
ENSG00000175482	POLD4	0.60473	7.95736e-17	5.1467e-15	0.0742354
ENSG00000130731	METTL26	0.980468	8.16925e-17	5.26514e-15	0.121737
ENSG00000139323	POC1B	-0.465349	8.32576e-17	5.34718e-15	0.0567246
ENSG00000198924	DCLRE1A	-0.776234	8.87459e-17	5.67974e-15	0.0959198
ENSG00000090971	NAT14	1.17181	1.00704e-16	6.42263e-15	0.146427
ENSG00000104825	NFKBIB	0.923868	1.02168e-16	6.49335e-15	0.114957
ENSG00000171462	DLK2	1.02239	1.07371e-16	6.80044e-15	0.12738
ENSG00000145217	SLC26A1	1.12323	1.07754e-16	6.80114e-15	0.140328
ENSG00000196505	GDAP2	-0.588222	1.09373e-16	6.8796e-15	0.0726906
ENSG00000100294	MCAT	0.976903	1.12679e-16	7.06327e-15	0.121772
ENSG00000126254	RBM42	1.07337	1.19065e-16	7.43808e-15	0.134951
ENSG00000125912	NCLN	0.976265	1.25193e-16	7.79435e-15	0.1229
ENSG00000130520	LSM4	0.631535	1.367e-16	8.4819e-15	0.0782894
ENSG00000039650	PNKP	0.672773	1.41736e-16	8.76463e-15	0.0833959
ENSG00000068912	ERLEC1	-0.433347	1.55401e-16	9.57731e-15	0.0532431
ENSG00000176396	EID2	0.636853	1.58993e-16	9.76578e-15	0.0789513
ENSG00000163781	TOPBP1	-0.395596	1.60015e-16	9.79568e-15	0.0485244
ENSG00000189227	C15orf61	0.941402	1.70308e-16	1.0391e-14	0.117914
ENSG00000197530	MIB2	1.36393	1.74945e-16	1.06385e-14	0.172258
ENSG00000107816	LZTS2	0.904761	1.82982e-16	1.10904e-14	0.113934
ENSG00000153339	TRAPPC8	-0.455381	1.8593e-16	1.12319e-14	0.0561312
ENSG00000167702	KIFC2	1.03498	1.90424e-16	1.14655e-14	0.130323
ENSG00000177051	FBXO46	0.898972	2.04337e-16	1.22629e-14	0.113119
ENSG00000179943	FIZ1	0.791754	2.07102e-16	1.23882e-14	0.0992502
ENSG00000165802	NSMF	0.754947	2.12604e-16	1.26759e-14	0.0945016
ENSG00000176125	UFSP1	1.93283	2.17306e-16	1.29142e-14	0.245943
ENSG00000161914	ZNF653	0.882358	2.54849e-16	1.50963e-14	0.111252
ENSG00000121851	POLR3GL	-0.670823	2.76975e-16	1.63015e-14	0.0840491
ENSG00000228300	FAM174C	1.18673	2.76351e-16	1.63015e-14	0.15102
ENSG00000110717	NDUFS8	0.722035	2.94616e-16	1.72841e-14	0.0911036
ENSG00000117000	RLF	-0.532981	3.14943e-16	1.84176e-14	0.066368
ENSG00000077097	TOP2B	-0.390413	3.1949e-16	1.8624e-14	0.0484401
ENSG00000213551	DNAJC9	0.698053	3.27532e-16	1.90322e-14	0.0877453
ENSG00000182952	HMGN4	-0.418205	3.31859e-16	1.92226e-14	0.0518708
ENSG00000105963	ADAP1	1.56861	3.68725e-16	2.12907e-14	0.20186
ENSG00000163605	PPP4R2	-0.396523	3.78067e-16	2.17615e-14	0.0493105
ENSG00000161904	LEMD2	0.543487	4.11632e-16	2.35454e-14	0.0671945
ENSG00000185838	GNB1L	0.996752	4.10459e-16	2.35454e-14	0.126974
ENSG00000170265	ZNF282	0.683906	4.29224e-16	2.44751e-14	0.0864333
ENSG00000170684	ZNF296	1.50621	4.35771e-16	2.47713e-14	0.192864
ENSG00000264947	MIR3181	4.41105	4.43938e-16	2.51574e-14	0.553172
ENSG00000167487	KLHL26	0.961393	4.53694e-16	2.56309e-14	0.122757
ENSG00000184897	H1-10	2.09004	4.62618e-16	2.60547e-14	0.271557
ENSG00000099804	CDC34	0.925703	5.21266e-16	2.92676e-14	0.118165
ENSG00000099821	POLRMT	1.01648	6.94323e-16	3.88651e-14	0.131217
ENSG00000146826	TRAPPC14	0.890556	7.18064e-16	4.00715e-14	0.114243
ENSG00000180921	FAM83H	1.28458	7.41505e-16	4.12538e-14	0.166511
ENSG00000099381	SETD1A	0.693855	7.67226e-16	4.25555e-14	0.0883727
ENSG00000174775	HRAS	0.977522	8.405e-16	4.64789e-14	0.126295
ENSG00000169718	DUS1L	0.652384	8.72203e-16	4.80868e-14	0.0831117
ENSG00000121879	PIK3CA	-0.440797	9.97141e-16	5.48098e-14	0.0557265
ENSG00000109180	OCIAD1	-0.438914	1.04963e-15	5.73503e-14	0.0554895
ENSG00000198517	MAFK	1.15601	1.0468e-15	5.73503e-14	0.150517
ENSG00000196531	NACA	-0.518647	1.05576e-15	5.75136e-14	0.0649431
ENSG00000104960	PTOV1	0.68185	1.10734e-15	6.01446e-14	0.0873947
ENSG00000169230	PRELID1	1.39087	1.15782e-15	6.27003e-14	0.182258
ENSG00000166233	ARIH1	-0.435002	1.17661e-15	6.35301e-14	0.0551063
ENSG00000180834	MAP6D1	2.72325	1.19166e-15	6.41533e-14	0.356003
ENSG00000104524	PYCR3	0.9197	1.21169e-15	6.50404e-14	0.118879
ENSG00000185522	LMNTD2	1.67168	1.2978e-15	6.94589e-14	0.220031
ENSG00000119559	C19orf25	0.822637	1.32495e-15	7.0705e-14	0.106453
ENSG00000177853	ZNF518A	-0.523369	1.49108e-15	7.93394e-14	0.0668837
ENSG00000159256	MORC3	-0.524138	1.54372e-15	8.1902e-14	0.0670213
ENSG00000152475	ZNF837	1.77042	1.58515e-15	8.38572e-14	0.233774
ENSG00000171823	FBXL14	1.18988	1.66338e-15	8.77423e-14	0.155248
ENSG00000169228	RAB24	1.64677	1.69623e-15	8.92179e-14	0.218115
ENSG00000104983	CCDC61	1.02428	1.82658e-15	9.57988e-14	0.134196
ENSG00000138834	MAPK8IP3	0.780046	1.8563e-15	9.70794e-14	0.101282
ENSG00000134086	VHL	0.710897	1.98484e-15	1.03506e-13	0.092218
ENSG00000164068	RNF123	0.451478	2.05692e-15	1.0696e-13	0.0578419
ENSG00000284015	MIR1281	4.18027	2.11277e-15	1.09553e-13	0.544815
ENSG00000169738	DCXR	1.00229	2.14735e-15	1.11032e-13	0.131426
ENSG00000105298	CACTIN	0.851816	2.28584e-15	1.17859e-13	0.111306
ENSG00000196504	PRPF40A	-0.354755	2.29642e-15	1.18072e-13	0.045322
ENSG00000130429	ARPC1B	0.680204	2.32269e-15	1.18756e-13	0.0882372
ENSG00000187555	USP7	-0.30304	2.31945e-15	1.18756e-13	0.0383573
ENSG00000047315	POLR2B	-0.376226	2.56726e-15	1.30581e-13	0.0480706
ENSG00000104964	TLE5	0.920266	2.56824e-15	1.30581e-13	0.120498
ENSG00000100726	TELO2	1.13957	2.65095e-15	1.34413e-13	0.150673
ENSG00000174276	ZNHIT2	1.37785	2.79268e-15	1.41208e-13	0.183525
ENSG00000025796	SEC63	-0.432346	3.06403e-15	1.54501e-13	0.0556344
ENSG00000164896	FASTK	0.755809	3.09993e-15	1.55882e-13	0.0990827
ENSG00000148334	PTGES2	0.726197	3.14281e-15	1.57267e-13	0.0949915
ENSG00000170604	IRF2BP1	1.47327	3.14465e-15	1.57267e-13	0.196948
ENSG00000137601	NEK1	-0.544154	3.25955e-15	1.62569e-13	0.0704967
ENSG00000275052	PPP4R3B	-0.341592	3.33864e-15	1.66061e-13	0.0437744
ENSG00000151532	VTI1A	-0.349674	3.36747e-15	1.67041e-13	0.0448264
ENSG00000130312	MRPL34	0.730697	3.45902e-15	1.71119e-13	0.0958235
ENSG00000103253	HAGHL	1.90755	3.63445e-15	1.79313e-13	0.258503
ENSG00000227507	LTB	1.27941	3.65664e-15	1.79923e-13	0.1701
ENSG00000078618	NRDC	-0.475742	3.78867e-15	1.85919e-13	0.0612507
ENSG00000288649	ACTL10	2.0848	3.83682e-15	1.87778e-13	0.278789
ENSG00000165879	FRAT1	0.893755	3.95313e-15	1.92955e-13	0.117712
ENSG00000107758	PPP3CB	-0.433187	3.97965e-15	1.93733e-13	0.0560249
ENSG00000123395	ATG101	0.930653	4.22837e-15	2.05294e-13	0.122962
ENSG00000179886	TIGD5	1.29322	4.2715e-15	2.0684e-13	0.172394
ENSG00000069424	KCNAB2	0.621507	4.40468e-15	2.12726e-13	0.0815482
ENSG00000198862	LTN1	-0.46957	4.43382e-15	2.1357e-13	0.0608923
ENSG00000164347	GFM2	-0.401691	4.68304e-15	2.24983e-13	0.0519444
ENSG00000141759	TXNL4A	0.605972	4.72827e-15	2.26561e-13	0.0791437
ENSG00000099866	MADCAM1	1.92145	4.8225e-15	2.30473e-13	0.257057
ENSG00000108106	UBE2S	1.2114	5.39578e-15	2.57199e-13	0.161844
ENSG00000176978	DPP7	0.969521	5.58653e-15	2.656e-13	0.129148
ENSG00000162298	SYVN1	0.428179	5.69172e-15	2.699e-13	0.0556674
ENSG00000004766	VPS50	-0.431275	6.21251e-15	2.93834e-13	0.0561366
ENSG00000167513	CDT1	1.43471	6.48929e-15	3.06134e-13	0.192772
ENSG00000117983	MUC5B	1.61723	6.99661e-15	3.29218e-13	0.217573
ENSG00000119669	IRF2BPL	1.11384	7.38112e-15	3.4642e-13	0.14931
ENSG00000138768	USO1	-0.45632	7.53913e-15	3.52932e-13	0.0597181
ENSG00000129911	KLF16	1.30894	8.38759e-15	3.91649e-13	0.177695
ENSG00000062194	GPBP1	-0.566225	8.82102e-15	4.1084e-13	0.0750376
ENSG00000106052	TAX1BP1	-0.474615	9.08246e-15	4.21942e-13	0.0610784
ENSG00000167543	TP53I13	0.944797	9.30252e-15	4.31072e-13	0.127186
ENSG00000092148	HECTD1	-0.302795	9.85066e-15	4.55319e-13	0.0394553
ENSG00000107290	SETX	-0.438516	1.00678e-14	4.64185e-13	0.0575534
ENSG00000101405	OXT	3.1266	1.07579e-14	4.94755e-13	0.426552
ENSG00000047188	YTHDC2	-0.372541	1.10468e-14	5.06769e-13	0.0485713
ENSG00000139266	MARCHF9	0.709479	1.19706e-14	5.47776e-13	0.0943448
ENSG00000179526	SHARPIN	0.679827	1.21434e-14	5.54297e-13	0.090678
ENSG00000100519	PSMC6	-0.27399	1.2229e-14	5.56817e-13	0.035767
ENSG00000164897	TMUB1	1.20623	1.22687e-14	5.57238e-13	0.164184
ENSG00000176024	ZNF613	-0.570086	1.27939e-14	5.79654e-13	0.0757048
ENSG00000153827	TRIP12	-0.424345	1.30757e-14	5.90957e-13	0.0563055
ENSG00000083535	PIBF1	-0.572512	1.32347e-14	5.96671e-13	0.0760383
ENSG00000104064	GABPB1	-0.529293	1.37042e-14	6.16321e-13	0.0700918
ENSG00000055208	TAB2	-0.506916	1.42049e-14	6.37273e-13	0.0673185
ENSG00000164944	VIRMA	-0.484351	1.46219e-14	6.54373e-13	0.0641563
ENSG00000141524	TMC6	0.870956	1.65723e-14	7.39853e-13	0.11785
ENSG00000028839	TBPL1	-0.5656	1.71721e-14	7.64765e-13	0.0753734
ENSG00000144674	GOLGA4	-0.50652	1.72562e-14	7.66643e-13	0.0675574
ENSG00000197050	ZNF420	-0.661615	1.77534e-14	7.86823e-13	0.0882594
ENSG00000127663	KDM4B	0.890881	1.82873e-14	8.0853e-13	0.119467
ENSG00000172795	DCP2	-0.463718	1.84667e-14	8.14491e-13	0.0616532
ENSG00000138246	DNAJC13	-0.552506	1.88275e-14	8.2841e-13	0.0740641
ENSG00000180448	ARHGAP45	1.1056	1.98831e-14	8.72756e-13	0.151336
ENSG00000103024	NME3	1.43162	2.13365e-14	9.34312e-13	0.198121
ENSG00000176182	MYPOP	1.2801	2.3892e-14	1.04372e-12	0.175938
ENSG00000188070	ZFTA	0.893585	2.81128e-14	1.22518e-12	0.122216
ENSG00000284691		0.920071	2.83599e-14	1.23302e-12	0.125545
ENSG00000176248	ANAPC2	0.641104	2.84695e-14	1.23485e-12	0.0870819
ENSG00000214160	ALG3	0.540967	2.9274e-14	1.26674e-12	0.0727778
ENSG00000167962	ZNF598	1.01644	2.97777e-14	1.2855e-12	0.139771
ENSG00000079246	XRCC5	-0.413183	3.04983e-14	1.31351e-12	0.0552161
ENSG00000130734	ATG4D	0.722254	3.145e-14	1.35131e-12	0.0984553
ENSG00000176101	SSNA1	0.75636	3.67756e-14	1.57644e-12	0.103407
ENSG00000107404	DVL1	1.13165	3.72171e-14	1.59164e-12	0.156685
ENSG00000076201	PTPN23	0.567442	3.94559e-14	1.68345e-12	0.0766257
ENSG00000276043	UHRF1	0.986534	4.13194e-14	1.75886e-12	0.136239
ENSG00000163535	SGO2	-0.60926	4.23714e-14	1.79946e-12	0.0827715
ENSG00000169696	ASPSCR1	0.94225	4.26647e-14	1.80772e-12	0.130388
ENSG00000084093	REST	-0.37055	4.28557e-14	1.81162e-12	0.0493816
ENSG00000104852	SNRNP70	0.796048	4.33729e-14	1.82926e-12	0.109132
ENSG00000103978	TMEM87A	-0.424682	4.49489e-14	1.88628e-12	0.0572288
ENSG00000129968	ABHD17A	1.08304	4.48986e-14	1.88628e-12	0.150399
ENSG00000225828	FAM229A	1.09788	4.50342e-14	1.88628e-12	0.152101
ENSG00000145833	DDX46	-0.258785	4.61737e-14	1.9296e-12	0.0345325
ENSG00000175416	CLTB	0.912104	4.8586e-14	2.02578e-12	0.126153
ENSG00000169905	TOR1AIP2	-0.413536	5.02562e-14	2.09066e-12	0.0557191
ENSG00000105699	LSR	0.866737	5.26469e-14	2.18514e-12	0.120133
ENSG00000160087	UBE2J2	0.729418	5.43801e-14	2.25198e-12	0.100509
ENSG00000118217	ATF6	-0.482927	5.46365e-14	2.25749e-12	0.0654882
ENSG00000161671	EMC10	0.679952	5.57238e-14	2.29723e-12	0.0933685
ENSG00000082213	C5orf22	-0.452661	5.83581e-14	2.40042e-12	0.0613225
ENSG00000170638	TRABD	1.19458	6.27533e-14	2.57542e-12	0.167887
ENSG00000174165	ZDHHC24	0.649475	6.63447e-14	2.71672e-12	0.08943
ENSG00000163013	FBXO41	0.689913	6.81246e-14	2.78338e-12	0.0951537
ENSG00000169972	PUSL1	0.962567	6.83881e-14	2.78792e-12	0.134218
ENSG00000158417	EIF5B	-0.474839	7.21667e-14	2.92891e-12	0.0646724
ENSG00000185122	HSF1	0.86238	7.21134e-14	2.92891e-12	0.120011
ENSG00000205078	SYCE1L	1.29997	7.42759e-14	3.00785e-12	0.182702
ENSG00000099330	OCEL1	0.790287	7.46987e-14	3.01829e-12	0.109762
ENSG00000157870	PRXL2B	1.04447	7.50547e-14	3.02599e-12	0.14655
ENSG00000172663	TMEM134	0.662161	8.58942e-14	3.4554e-12	0.0914387
ENSG00000214655	ZSWIM8	0.549006	8.92754e-14	3.58355e-12	0.0750767
ENSG00000211769	TRBJ2-5	2.03183	9.13088e-14	3.65715e-12	0.28857
ENSG00000158716	DUSP23	1.35393	9.4682e-14	3.78397e-12	0.191914
ENSG00000126653	NSRP1	-0.416076	9.85672e-14	3.93066e-12	0.0567745
ENSG00000238227	TMEM250	0.820786	1.11086e-13	4.42025e-12	0.115252
ENSG00000125817	CENPB	0.893181	1.14573e-13	4.54911e-12	0.126702
ENSG00000103150	MLYCD	0.57579	1.14834e-13	4.5496e-12	0.0797048
ENSG00000181218	H2AC25	0.975468	1.1802e-13	4.66573e-12	0.137417
ENSG00000177548	RABEP2	0.906888	1.19819e-13	4.72666e-12	0.127062
ENSG00000229809	ZNF688	0.900779	1.20483e-13	4.74263e-12	0.127044
ENSG00000146830	GIGYF1	0.640592	1.26544e-13	4.97052e-12	0.0890841
ENSG00000105856	HBP1	-0.490533	1.29149e-13	5.05176e-12	0.0675818
ENSG00000186787	SPIN2B	0.684077	1.29164e-13	5.05176e-12	0.0949661
ENSG00000175216	CKAP5	-0.353054	1.30296e-13	5.08516e-12	0.0482585
ENSG00000185112	FAM43A	1.7046	1.32496e-13	5.16003e-12	0.242911
ENSG00000145996	CDKAL1	-0.364184	1.34838e-13	5.24006e-12	0.0498348
ENSG00000233276	GPX1	1.83219	1.35239e-13	5.24454e-12	0.265797
ENSG00000103326	CAPN15	1.28885	1.38303e-13	5.35201e-12	0.183614
ENSG00000119203	CPSF3	-0.467016	1.39646e-13	5.39258e-12	0.0643422
ENSG00000058453	CROCC	1.31315	1.4632e-13	5.63842e-12	0.186412
ENSG00000007376	RPUSD1	1.06015	1.5688e-13	6.02987e-12	0.15041
ENSG00000168538	TRAPPC11	-0.339556	1.57467e-13	6.02987e-12	0.0467011
ENSG00000175221	MED16	1.15506	1.5734e-13	6.02987e-12	0.164251
ENSG00000105135	ILVBL	0.609743	1.70475e-13	6.51435e-12	0.0852412
ENSG00000114062	UBE3A	-0.35282	1.87869e-13	7.16407e-12	0.0485361
ENSG00000146083	RNF44	0.828807	1.88736e-13	7.18218e-12	0.116188
ENSG00000100106	TRIOBP	0.691424	1.89529e-13	7.19737e-12	0.0967461
ENSG00000007080	CCDC124	0.957137	1.90502e-13	7.21937e-12	0.136209
ENSG00000112667	DNPH1	1.52292	1.90973e-13	7.22226e-12	0.222134
ENSG00000115875	SRSF7	-0.390234	2.00559e-13	7.56913e-12	0.0542715
ENSG00000162576	MXRA8	1.24428	2.04828e-13	7.71433e-12	0.177124
ENSG00000156875	MFSD14A	0.904159	2.11342e-13	7.94332e-12	0.128157
ENSG00000176410	DNAJC30	0.704992	2.11995e-13	7.95155e-12	0.0994418
ENSG00000184110	EIF3C	0.996641	2.38244e-13	8.91782e-12	0.141972
ENSG00000105738	SIPA1L3	0.7986	2.42395e-13	9.0547e-12	0.113227
ENSG00000127452	FBXL12	0.440921	2.52124e-13	9.39895e-12	0.0613603
ENSG00000136877	FPGS	0.846635	2.55812e-13	9.51702e-12	0.120569
ENSG00000139722	VPS37B	0.550711	2.68572e-13	9.9715e-12	0.0771696
ENSG00000122299	ZC3H7A	-0.234812	2.7389e-13	1.01484e-11	0.0323232
ENSG00000166747	AP1G1	-0.470576	2.82744e-13	1.04552e-11	0.0648901
ENSG00000077454	LRCH4	0.793167	2.85837e-13	1.05483e-11	0.112672
ENSG00000105607	GCDH	0.592625	2.98013e-13	1.09535e-11	0.083661
ENSG00000148925	BTBD10	-0.454861	2.97574e-13	1.09535e-11	0.0635665
ENSG00000112893	MAN2A1	-0.400881	3.08179e-13	1.13044e-11	0.056137
ENSG00000143543	JTB	-0.764848	3.11385e-13	1.13992e-11	0.108926
ENSG00000099904	ZDHHC8	0.871604	3.28117e-13	1.19877e-11	0.124689
ENSG00000161847	RAVER1	1.06952	3.40256e-13	1.24065e-11	0.154154
ENSG00000277972	CISD3	0.893172	3.53046e-13	1.28472e-11	0.128161
ENSG00000197785	ATAD3A	0.994599	3.56458e-13	1.29457e-11	0.143492
ENSG00000078142	PIK3C3	-0.383838	3.73666e-13	1.35437e-11	0.05341
ENSG00000179846	NKPD1	1.55788	3.77574e-13	1.36583e-11	0.226105
ENSG00000143437	ARNT	-0.3175	3.8394e-13	1.38612e-11	0.0441528
ENSG00000179832	MROH1	0.944827	4.1476e-13	1.49444e-11	0.136039
ENSG00000146576	INTS15	0.731881	4.1797e-13	1.50305e-11	0.104895
ENSG00000070770	CSNK2A2	-0.326466	4.28461e-13	1.53775e-11	0.0456679
ENSG00000164880	INTS1	1.11332	4.60512e-13	1.64955e-11	0.161428
ENSG00000103152	MPG	0.980429	4.62251e-13	1.65255e-11	0.141801
ENSG00000172650	AGAP5	1.25061	4.72009e-13	1.68414e-11	0.181429
ENSG00000178761	FAM219B	0.495572	4.83652e-13	1.72233e-11	0.0700979
ENSG00000136807	CDK9	0.384863	4.97628e-13	1.76866e-11	0.054568
ENSG00000128011	LRFN1	1.42896	4.99993e-13	1.77362e-11	0.210709
ENSG00000184260	H2AC20	1.95755	5.10376e-13	1.80695e-11	0.285642
ENSG00000224051	CPTP	1.19696	5.21687e-13	1.84343e-11	0.175107
ENSG00000215301	DDX3X	-0.366798	5.24119e-13	1.84845e-11	0.0514849
ENSG00000258366	RTEL1	0.721379	5.30581e-13	1.86765e-11	0.103495
ENSG00000161036	LRWD1	0.914624	5.34377e-13	1.8774e-11	0.13197
ENSG00000083642	PDS5B	-0.477327	5.7308e-13	2.00567e-11	0.068114
ENSG00000162227	TAF6L	0.753702	5.72823e-13	2.00567e-11	0.108491
ENSG00000071564	TCF3	0.871259	5.75144e-13	2.00905e-11	0.126268
ENSG00000162591	MEGF6	1.15297	6.10283e-13	2.12774e-11	0.168039
ENSG00000105472	CLEC11A	2.30017	6.14244e-13	2.13387e-11	0.338876
ENSG00000127580	WDR24	1.1327	6.14373e-13	2.13387e-11	0.165812
ENSG00000160072	ATAD3B	0.73443	6.2756e-13	2.17554e-11	0.105871
ENSG00000139726	DENR	-0.303746	6.3352e-13	2.19205e-11	0.0427249
ENSG00000234965	SHISA8	2.99407	6.35221e-13	2.19379e-11	0.44904
ENSG00000113597	TRAPPC13	-0.432456	6.3831e-13	2.20031e-11	0.0611911
ENSG00000137500	CCDC90B	-0.365043	6.66863e-13	2.29107e-11	0.0515919
ENSG00000196757	ZNF700	-0.637982	6.67143e-13	2.29107e-11	0.0922635
ENSG00000167797	CDK2AP2	0.808423	6.93173e-13	2.376e-11	0.11741
ENSG00000126524	SBDS	-0.683353	7.00787e-13	2.39761e-11	0.0988868
ENSG00000160336	ZNF761	-0.640021	7.20266e-13	2.45966e-11	0.0920496
ENSG00000115138	POMC	1.66284	7.22277e-13	2.46193e-11	0.247229
ENSG00000156983	BRPF1	0.376761	7.25725e-13	2.46909e-11	0.0541877
ENSG00000040608	RTN4R	1.87423	7.3537e-13	2.49726e-11	0.280759
ENSG00000044090	CUL7	0.417604	7.37865e-13	2.50109e-11	0.0590778
ENSG00000038358	EDC4	0.434904	7.5779e-13	2.56388e-11	0.0623445
ENSG00000158792	SPATA2L	1.16277	7.78012e-13	2.62744e-11	0.170204
ENSG00000178342	KCNG2	3.72405	8.05727e-13	2.71603e-11	0.539793
ENSG00000154370	TRIM11	0.557367	8.13363e-13	2.73673e-11	0.0801903
ENSG00000130254	SAFB2	0.628951	8.34269e-13	2.80192e-11	0.0907746
ENSG00000177192	PUS1	0.647232	8.42212e-13	2.82341e-11	0.0934728
ENSG00000143337	TOR1AIP1	-0.411896	8.44207e-13	2.82493e-11	0.058556
ENSG00000137871	ZNF280D	-0.547729	8.55584e-13	2.85778e-11	0.0785617
ENSG00000153201	RANBP2	-0.43032	8.86133e-13	2.95442e-11	0.0609413
ENSG00000005007	UPF1	0.581352	9.06278e-13	3.01609e-11	0.0843688
ENSG00000130758	MAP3K10	1.0013	9.82192e-13	3.2628e-11	0.146636
ENSG00000161970	RPL26	-0.779505	1.00182e-12	3.32198e-11	0.113558
ENSG00000165934	CPSF2	-0.450925	1.03055e-12	3.41106e-11	0.0645883
ENSG00000139350	NEDD1	-0.371786	1.05338e-12	3.48033e-11	0.0530662
ENSG00000173638	SLC19A1	0.95177	1.06846e-12	3.52381e-11	0.139468
ENSG00000089820	ARHGAP4	0.978882	1.0752e-12	3.53964e-11	0.144517
ENSG00000071655	MBD3	0.950024	1.08343e-12	3.56035e-11	0.139816
ENSG00000189409	MMP23B	2.79044	1.10638e-12	3.62923e-11	0.4169
ENSG00000075089	ACTR6	-0.449485	1.11912e-12	3.663e-11	0.0628903
ENSG00000161618	ALDH16A1	1.09414	1.12067e-12	3.663e-11	0.162025
ENSG00000101199	ARFGAP1	0.567058	1.14714e-12	3.74282e-11	0.0816679
ENSG00000146063	TRIM41	0.522372	1.24063e-12	4.04065e-11	0.0751565
ENSG00000100485	SOS2	-0.4928	1.25868e-12	4.09218e-11	0.0709973
ENSG00000142459	EVI5L	0.890735	1.27328e-12	4.1323e-11	0.131503
ENSG00000135736	CCDC102A	1.25324	1.29065e-12	4.18124e-11	0.18727
ENSG00000127616	SMARCA4	0.465797	1.30041e-12	4.20544e-11	0.066948
ENSG00000260001	TGFBR3L	2.11609	1.34164e-12	4.33112e-11	0.315183
ENSG00000171161	ZNF672	0.730538	1.35187e-12	4.35644e-11	0.106842
ENSG00000007541	PIGQ	0.644255	1.5349e-12	4.93758e-11	0.0938488
ENSG00000174428	GTF2IRD2B	0.828906	1.53778e-12	4.93816e-11	0.122148
ENSG00000196683	TOMM7	-0.635665	1.5449e-12	4.95234e-11	0.0928415
ENSG00000092439	TRPM7	-0.459724	1.60361e-12	5.13155e-11	0.0664533
ENSG00000106009	BRAT1	0.819289	1.61133e-12	5.14243e-11	0.12142
ENSG00000167685	ZNF444	0.708781	1.61263e-12	5.14243e-11	0.104028
ENSG00000130733	YIPF2	0.704959	1.62502e-12	5.17294e-11	0.103611
ENSG00000213316	LTC4S	1.70602	1.63875e-12	5.2076e-11	0.258946
ENSG00000198837	DENND4B	0.537202	1.6653e-12	5.28277e-11	0.0784064
ENSG00000198055	GRK6	0.695158	1.76133e-12	5.57776e-11	0.102634
ENSG00000155034	FBXL18	0.876987	1.78185e-12	5.63299e-11	0.130273
ENSG00000153113	CAST	-0.431139	1.85802e-12	5.86367e-11	0.0622942
ENSG00000162607	USP1	-0.408003	2.00507e-12	6.31682e-11	0.0572751
ENSG00000127511	SIN3B	0.54338	2.01587e-12	6.33994e-11	0.0790373
ENSG00000165175	MID1IP1	0.99658	2.04333e-12	6.41528e-11	0.149646
ENSG00000183496	MEX3B	1.00689	2.07116e-12	6.49152e-11	0.150591
ENSG00000012211	PRICKLE3	0.896109	2.11513e-12	6.61799e-11	0.133465
ENSG00000146828	SLC12A9	0.638145	2.12583e-12	6.64012e-11	0.0927834
ENSG00000063176	SPHK2	0.836279	2.14829e-12	6.69886e-11	0.124295
ENSG00000073169	SELENOO	1.01456	2.19411e-12	6.83011e-11	0.152075
ENSG00000152683	SLC30A6	-0.416608	2.20453e-12	6.85088e-11	0.060532
ENSG00000185803	SLC52A2	0.832597	2.22777e-12	6.91136e-11	0.123996
ENSG00000214706	IFRD2	0.86279	2.26101e-12	7.00262e-11	0.129212
ENSG00000116685	KIAA2013	0.743345	2.28104e-12	7.05273e-11	0.110457
ENSG00000127080	IPPK	0.59635	2.45318e-12	7.57219e-11	0.0878639
ENSG00000112701	SENP6	-0.391141	2.45921e-12	7.578e-11	0.0567317
ENSG00000164190	NIPBL	-0.454647	2.48384e-12	7.64105e-11	0.0662462
ENSG00000261408	TEN1-CDK3	1.07372	2.50522e-12	7.69388e-11	0.161284
ENSG00000104880	ARHGEF18	0.714657	2.63142e-12	8.06792e-11	0.10624
ENSG00000203485	INF2	1.04558	2.69347e-12	8.24436e-11	0.157656
ENSG00000198276	UCKL1	0.55589	2.70556e-12	8.26754e-11	0.0815557
ENSG00000140990	NDUFB10	0.59985	2.78244e-12	8.48831e-11	0.0887544
ENSG00000100038	TOP3B	1.25745	2.80217e-12	8.53427e-11	0.189906
ENSG00000161677	JOSD2	1.50296	2.86303e-12	8.70514e-11	0.231219
ENSG00000067248	DHX29	-0.325595	2.88575e-12	8.75966e-11	0.0471638
ENSG00000110075	PPP6R3	-0.306945	2.90046e-12	8.78975e-11	0.0444029
ENSG00000128626	MRPS12	0.860547	2.95228e-12	8.932e-11	0.128859
ENSG00000262919	CCNQ	0.610018	3.03618e-12	9.17066e-11	0.0904481
ENSG00000134815	DHX34	0.780547	3.1328e-12	9.4469e-11	0.116636
ENSG00000064961	HMG20B	0.809467	3.17494e-12	9.55825e-11	0.121681
ENSG00000106330	MOSPD3	0.932179	3.19524e-12	9.60357e-11	0.13997
ENSG00000197766	CFD	2.70577	3.35407e-12	1.00644e-10	0.41855
ENSG00000115239	ASB3	-0.43697	3.38116e-12	1.01291e-10	0.0639949
ENSG00000169131	ZNF354A	-0.671151	3.52299e-12	1.05367e-10	0.100273
ENSG00000167799	NUDT8	1.56639	3.70303e-12	1.10571e-10	0.240385
ENSG00000168061	SAC3D1	1.38194	3.76249e-12	1.12164e-10	0.21157
ENSG00000127220	ABHD8	1.34141	3.93615e-12	1.1715e-10	0.205823
ENSG00000170242	USP47	-0.436003	3.98679e-12	1.18465e-10	0.0640907
ENSG00000099889	ARVCF	1.02591	4.15221e-12	1.22981e-10	0.155235
ENSG00000197150	ABCB8	0.495492	4.15043e-12	1.22981e-10	0.07352
ENSG00000179091	CYC1	0.795838	4.22027e-12	1.24795e-10	0.120108
ENSG00000291317	TMEM276	1.23771	4.56604e-12	1.34801e-10	0.189203
ENSG00000101290	CDS2	-0.261939	4.62015e-12	1.36179e-10	0.0386985
ENSG00000115694	STK25	0.378536	4.8596e-12	1.43007e-10	0.0557621
ENSG00000179598	PLD6	0.912119	4.96627e-12	1.45911e-10	0.138515
ENSG00000060069	CTDP1	0.877376	5.03478e-12	1.47687e-10	0.133227
ENSG00000173653	RCE1	0.530923	5.10882e-12	1.49619e-10	0.079087
ENSG00000204839	MROH6	1.06857	5.25769e-12	1.53733e-10	0.163141
ENSG00000168958	MFF	-0.316787	5.33724e-12	1.5581e-10	0.0466245
ENSG00000107651	SEC23IP	-0.295262	5.51036e-12	1.60608e-10	0.0432595
ENSG00000092020	PPP2R3C	-0.465858	5.8162e-12	1.69252e-10	0.0692334
ENSG00000004700	RECQL	-0.387317	5.86088e-12	1.70282e-10	0.0571603
ENSG00000105397	TYK2	0.5289	5.94939e-12	1.72404e-10	0.077029
ENSG00000135457	TFCP2	-0.39102	5.95277e-12	1.72404e-10	0.0578149
ENSG00000129194	SOX15	1.20713	5.97891e-12	1.72888e-10	0.186425
ENSG00000142798	HSPG2	1.3239	6.11445e-12	1.76528e-10	0.204203
ENSG00000102890	ELMO3	0.829179	6.25769e-12	1.80379e-10	0.126724
ENSG00000130669	PAK4	1.06355	6.32302e-12	1.81976e-10	0.163005
ENSG00000107625	DDX50	-0.382572	6.33714e-12	1.82096e-10	0.0565765
ENSG00000053371	AKR7A2	0.556619	6.38441e-12	1.83167e-10	0.0834395
ENSG00000136371	MTHFS	1.46769	6.67301e-12	1.91147e-10	0.229184
ENSG00000146463	ZMYM4	-0.375489	6.71549e-12	1.92063e-10	0.0576604
ENSG00000118482	PHF3	-0.473064	6.77363e-12	1.93424e-10	0.0700445
ENSG00000184967	NOC4L	0.876949	6.78679e-12	1.93498e-10	0.134165
ENSG00000011451	WIZ	0.688479	7.08112e-12	2.00695e-10	0.103222
ENSG00000094975	SUCO	-0.355505	7.07371e-12	2.00695e-10	0.0525188
ENSG00000132522	GPS2	0.913116	7.0831e-12	2.00695e-10	0.140041
ENSG00000165525	NEMF	-0.305072	7.05727e-12	2.00695e-10	0.0456092
ENSG00000137944	KYAT3	-0.587075	7.34032e-12	2.07662e-10	0.088386
ENSG00000033178	UBA6	-0.463592	7.60408e-12	2.14792e-10	0.0692395
ENSG00000183691	NOG	1.91548	7.80106e-12	2.20016e-10	0.303053
ENSG00000186994	KANK3	1.81076	8.2373e-12	2.31962e-10	0.283131
ENSG00000099875	MKNK2	0.89119	8.4768e-12	2.3834e-10	0.136393
ENSG00000119673	ACOT2	1.15531	8.67167e-12	2.43445e-10	0.179511
ENSG00000128228	SDF2L1	1.75017	8.69955e-12	2.43854e-10	0.280854
ENSG00000147601	TERF1	-0.396624	8.7434e-12	2.44708e-10	0.0590996
ENSG00000085224	ATRX	-0.413643	8.94124e-12	2.49863e-10	0.0616627
ENSG00000187808	SOWAHD	1.49589	9.21528e-12	2.57129e-10	0.236034
ENSG00000188986	NELFB	0.745812	9.87214e-12	2.75037e-10	0.113695
ENSG00000077463	SIRT6	0.82521	1.0342e-11	2.87348e-10	0.127093
ENSG00000136937	NCBP1	-0.346848	1.03454e-11	2.87348e-10	0.0514702
ENSG00000137947	GTF2B	-0.603114	1.04261e-11	2.8915e-10	0.0917201
ENSG00000173511	VEGFB	0.865238	1.05054e-11	2.90908e-10	0.134162
ENSG00000187017	ESPN	1.73999	1.07204e-11	2.96413e-10	0.28217
ENSG00000172009	THOP1	0.858584	1.09533e-11	3.02398e-10	0.132779
ENSG00000164758	MED30	0.498122	1.12576e-11	3.1033e-10	0.0751845
ENSG00000221914	PPP2R2A	-0.360967	1.13409e-11	3.12157e-10	0.0539747
ENSG00000140598	EFL1	-0.539162	1.14769e-11	3.15424e-10	0.081707
ENSG00000242802	AP5Z1	0.833036	1.16063e-11	3.18503e-10	0.129696
ENSG00000132361	CLUH	0.897634	1.18719e-11	3.25305e-10	0.1383
ENSG00000166225	FRS2	-0.481499	1.21323e-11	3.31942e-10	0.0727418
ENSG00000140688	RUSF1	0.445237	1.24425e-11	3.39921e-10	0.067285
ENSG00000113441	LNPEP	-0.613479	1.29286e-11	3.52676e-10	0.0934364
ENSG00000160993	ALKBH4	0.708114	1.33417e-11	3.63402e-10	0.109091
ENSG00000148384	INPP5E	0.731272	1.34211e-11	3.65022e-10	0.112252
ENSG00000140691	ARMC5	0.988629	1.3672e-11	3.71294e-10	0.154528
ENSG00000182512	GLRX5	0.656544	1.37954e-11	3.74092e-10	0.100635
ENSG00000103335	PIEZO1	0.769648	1.39874e-11	3.78736e-10	0.119068
ENSG00000105401	CDC37	0.42468	1.45109e-11	3.9233e-10	0.0654966
ENSG00000102871	TRADD	1.0974	1.46986e-11	3.96818e-10	0.173095
ENSG00000062822	POLD1	0.917432	1.47259e-11	3.96957e-10	0.143136
ENSG00000181135	ZNF707	0.596924	1.47471e-11	3.96957e-10	0.0913888
ENSG00000132635	PCED1A	0.663766	1.4828e-11	3.98548e-10	0.102603
ENSG00000179364	PACS2	0.641142	1.48837e-11	3.9946e-10	0.0980881
ENSG00000185730	ZNF696	0.870957	1.49481e-11	4.00601e-10	0.13581
ENSG00000051523	CYBA	0.880786	1.56343e-11	4.18379e-10	0.137533
ENSG00000067900	ROCK1	-0.309976	1.58494e-11	4.23514e-10	0.0465282
ENSG00000111530	CAND1	-0.239776	1.65217e-11	4.40836e-10	0.0359241
ENSG00000171703	TCEA2	0.73199	1.70161e-11	4.53365e-10	0.113383
ENSG00000172775	PSME3IP1	-0.255661	1.70956e-11	4.54822e-10	0.0383066
ENSG00000100413	POLR3H	0.573996	1.81335e-11	4.81038e-10	0.0883543
ENSG00000131196	NFATC1	0.712561	1.81227e-11	4.81038e-10	0.110188
ENSG00000099385	BCL7C	0.724805	1.82455e-11	4.83309e-10	0.111853
ENSG00000032219	ARID4A	-0.459862	1.86451e-11	4.93179e-10	0.070036
ENSG00000100300	TSPO	1.5472	1.87403e-11	4.94982e-10	0.245728
ENSG00000126464	PRR12	1.07388	1.93092e-11	5.09274e-10	0.169458
ENSG00000171159	BBLN	1.10127	1.94186e-11	5.11422e-10	0.174525
ENSG00000047410	TPR	-0.384728	1.99525e-11	5.24729e-10	0.0604119
ENSG00000135837	CEP350	-0.392536	2.01051e-11	5.27983e-10	0.0596858
ENSG00000053770	AP5M1	-0.359665	2.0246e-11	5.30921e-10	0.0546034
ENSG00000105723	GSK3A	0.582539	2.04331e-11	5.35061e-10	0.089485
ENSG00000119414	PPP6C	-0.290874	2.14837e-11	5.60967e-10	0.0445478
ENSG00000167733	HSD11B1L	0.841834	2.14586e-11	5.60967e-10	0.131749
ENSG00000103121	CMC2	-0.570961	2.17588e-11	5.67341e-10	0.0880911
ENSG00000112659	CUL9	0.486577	2.19273e-11	5.69303e-10	0.075371
ENSG00000149100	EIF3M	-0.347861	2.18739e-11	5.69303e-10	0.0523555
ENSG00000153147	SMARCA5	-0.444044	2.19274e-11	5.69303e-10	0.0678432
ENSG00000108479	GALK1	0.926121	2.20063e-11	5.70544e-10	0.1456
ENSG00000108599	AKAP10	-0.367068	2.20561e-11	5.71025e-10	0.0557695
ENSG00000136527	TRA2B	-0.349528	2.21682e-11	5.73116e-10	0.0516326
ENSG00000129083	COPB1	-0.405784	2.28986e-11	5.91166e-10	0.0619134
ENSG00000167526	RPL13	0.86912	2.2948e-11	5.91606e-10	0.136892
ENSG00000135655	USP15	-0.565289	2.29808e-11	5.91618e-10	0.0881496
ENSG00000135164	DMTF1	-0.573191	2.34202e-11	6.02082e-10	0.0884338
ENSG00000159069	FBXW5	1.11976	2.35629e-11	6.04901e-10	0.179265
ENSG00000141959	PFKL	0.698347	2.37777e-11	6.09562e-10	0.108467
ENSG00000130479	MAP1S	1.28765	2.38298e-11	6.10043e-10	0.206068
ENSG00000140521	POLG	0.295923	2.40504e-11	6.1483e-10	0.0446967
ENSG00000186395	KRT10	0.832495	2.46249e-11	6.28639e-10	0.130443
ENSG00000148481	MINDY3	-0.406694	2.48194e-11	6.32721e-10	0.062088
ENSG00000198522	GPN1	-0.452644	2.53486e-11	6.45313e-10	0.0679025
ENSG00000105655	ISYNA1	0.951251	2.54014e-11	6.4576e-10	0.150153
ENSG00000111237	VPS29	-0.375279	2.67441e-11	6.78951e-10	0.0569852
ENSG00000162521	RBBP4	-0.282326	2.6912e-11	6.82267e-10	0.0428636
ENSG00000115947	ORC4	-0.389443	2.74182e-11	6.94139e-10	0.0595001
ENSG00000108055	SMC3	-0.351052	2.76434e-11	6.98874e-10	0.0534795
ENSG00000176108	CHMP6	0.590948	2.78551e-11	7.02719e-10	0.0919085
ENSG00000272333	KMT2B	0.682512	2.78723e-11	7.02719e-10	0.106603
ENSG00000141994	DUS3L	0.830997	2.85899e-11	7.19822e-10	0.13045
ENSG00000169635	HIC2	0.584192	2.88895e-11	7.26365e-10	0.0906618
ENSG00000185163	DDX51	0.526232	2.95861e-11	7.42859e-10	0.0815265
ENSG00000151445	VIPAS39	-0.328812	3.06284e-11	7.67976e-10	0.0500327
ENSG00000185359	HGS	0.642998	3.08003e-11	7.71231e-10	0.100481
ENSG00000176472	ZNF575	1.08348	3.13547e-11	7.84039e-10	0.172648
ENSG00000001629	ANKIB1	-0.389181	3.15417e-11	7.87638e-10	0.0599802
ENSG00000111087	GLI1	1.15485	3.22244e-11	8.0359e-10	0.184039
ENSG00000123143	PKN1	0.785092	3.28983e-11	8.1928e-10	0.124546
ENSG00000111540	RAB5B	-0.251802	3.46995e-11	8.62961e-10	0.038259
ENSG00000171492	LRRC8D	-0.498129	3.47886e-11	8.64005e-10	0.077297
ENSG00000161996	WDR90	0.819764	3.53021e-11	8.75569e-10	0.130109
ENSG00000123106	CCDC91	-0.480015	3.56501e-11	8.83004e-10	0.0743144
ENSG00000125910	S1PR4	1.21286	3.87528e-11	9.58556e-10	0.197104
ENSG00000103591	AAGAB	-0.418783	4.02012e-11	9.93041e-10	0.0645534
ENSG00000078674	PCM1	-0.403016	4.06226e-11	1.00081e-09	0.0622104
ENSG00000171695	LKAAEAR1	2.96804	4.06251e-11	1.00081e-09	0.480474
ENSG00000164162	ANAPC10	-0.54662	4.11763e-11	1.01303e-09	0.0852971
ENSG00000161835	TAMALIN	1.14362	4.17081e-11	1.02473e-09	0.185499
ENSG00000175137	SH3BP5L	0.496842	4.17682e-11	1.02483e-09	0.0774004
ENSG00000014919	COX15	-0.402271	4.31812e-11	1.05668e-09	0.0622137
ENSG00000151779	NBAS	-0.359326	4.31815e-11	1.05668e-09	0.0553965
ENSG00000196456	ZNF775	1.3445	4.32822e-11	1.05773e-09	0.218894
ENSG00000168936	TMEM129	0.597141	4.50175e-11	1.09867e-09	0.0945185
ENSG00000029363	BCLAF1	-0.532922	4.55597e-11	1.10996e-09	0.0834336
ENSG00000109736	MFSD10	0.97535	4.56016e-11	1.10996e-09	0.156686
ENSG00000172336	POP7	0.671641	4.57512e-11	1.11212e-09	0.106755
ENSG00000159658	EFCAB14	-0.224897	4.65983e-11	1.13122e-09	0.0345593
ENSG00000055147	FAM114A2	-0.338353	4.81191e-11	1.16658e-09	0.0519139
ENSG00000100567	PSMA3	-0.354208	4.88379e-11	1.18245e-09	0.0547437
ENSG00000156671	SAMD8	-0.414806	4.91713e-11	1.18895e-09	0.0643741
ENSG00000113575	PPP2CA	0.57915	4.93472e-11	1.19162e-09	0.091093
ENSG00000059145	UNKL	1.0628	4.99349e-11	1.20423e-09	0.171703
ENSG00000049769	PPP1R3F	0.888408	5.00862e-11	1.2062e-09	0.142646
ENSG00000148341	SH3GLB2	0.4947	5.01978e-11	1.2062e-09	0.0772502
ENSG00000205937	RNPS1	0.355759	5.02146e-11	1.2062e-09	0.0546305
ENSG00000141002	TCF25	0.39198	5.18851e-11	1.2447e-09	0.0597251
ENSG00000004897	CDC27	-0.477389	5.21036e-11	1.2483e-09	0.0745721
ENSG00000005206	SPPL2B	0.972477	5.46739e-11	1.30817e-09	0.158479
ENSG00000112237	CCNC	-0.540608	5.72173e-11	1.36724e-09	0.0853892
ENSG00000166326	TRIM44	-0.258614	5.9293e-11	1.41499e-09	0.0400252
ENSG00000169683	LRRC45	0.861487	6.02075e-11	1.43495e-09	0.138557
ENSG00000150527	MIA2	-0.43145	6.04959e-11	1.43807e-09	0.0674062
ENSG00000165219	GAPVD1	-0.358648	6.04239e-11	1.43807e-09	0.0557318
ENSG00000105221	AKT2	0.35637	6.16096e-11	1.46265e-09	0.055508
ENSG00000066557	LRRC40	-0.418313	6.24707e-11	1.48117e-09	0.0653566
ENSG00000197774	EME2	0.687202	6.29318e-11	1.49017e-09	0.109606
ENSG00000135519	KCNH3	1.10864	6.34428e-11	1.50033e-09	0.180061
ENSG00000128915	ICE2	-0.381963	6.40154e-11	1.51192e-09	0.0597625
ENSG00000062650	WAPL	-0.263507	6.47621e-11	1.52759e-09	0.0408284
ENSG00000167283	ATP5MG	-0.516966	6.76808e-11	1.59438e-09	0.0816046
ENSG00000150776	NKAPD1	-0.336297	6.97663e-11	1.64139e-09	0.052304
ENSG00000135913	USP37	-0.451356	6.99153e-11	1.64279e-09	0.0707799
ENSG00000090372	STRN4	0.60692	7.60716e-11	1.78515e-09	0.0974452
ENSG00000198435	NRARP	1.69595	7.72766e-11	1.8111e-09	0.281514
ENSG00000198677	SKIC3	-0.34925	7.95352e-11	1.86165e-09	0.0545445
ENSG00000065268	WDR18	0.916434	8.40654e-11	1.96518e-09	0.148573
ENSG00000115966	ATF2	-0.404073	8.64091e-11	2.01739e-09	0.0625417
ENSG00000077254	USP33	-0.448349	8.71575e-11	2.03227e-09	0.0705546
ENSG00000132676	DAP3	-0.232623	9.13109e-11	2.12641e-09	0.0361612
ENSG00000105373	NOP53	0.972753	9.22593e-11	2.14576e-09	0.159505
ENSG00000177374	HIC1	1.80041	9.57336e-11	2.22374e-09	0.298621
ENSG00000125520	SLC2A4RG	0.957012	9.66295e-11	2.24171e-09	0.157279
ENSG00000163946	TASOR	-0.397883	9.79119e-11	2.26858e-09	0.0624322
ENSG00000102699	PARP4	-0.590535	1.02103e-10	2.36269e-09	0.0943629
ENSG00000033011	ALG1	0.463233	1.03302e-10	2.38742e-09	0.0735997
ENSG00000172831	CES2	0.33675	1.04847e-10	2.42008e-09	0.0528523
ENSG00000159592	GPBP1L1	-0.305827	1.05288e-10	2.4272e-09	0.047738
ENSG00000104643	MTMR9	-0.446502	1.12422e-10	2.58838e-09	0.0708811
ENSG00000135334	AKIRIN2	0.55162	1.14353e-10	2.62955e-09	0.0880764
ENSG00000116266	STXBP3	-0.395459	1.14717e-10	2.63462e-09	0.0625992
ENSG00000161544	CYGB	1.93866	1.16303e-10	2.66768e-09	0.32562
ENSG00000160957	RECQL4	0.835437	1.17577e-10	2.69354e-09	0.136934
ENSG00000176058	TPRN	0.78513	1.19839e-10	2.74192e-09	0.128273
ENSG00000004059	ARF5	0.613419	1.24989e-10	2.85261e-09	0.0978234
ENSG00000174851	YIF1A	0.644484	1.24836e-10	2.85261e-09	0.103963
ENSG00000167491	GATAD2A	0.459966	1.25891e-10	2.86963e-09	0.0728123
ENSG00000151470	C4orf33	-0.620903	1.32937e-10	3.02648e-09	0.100452
ENSG00000188428	BLOC1S5	-0.4065	1.3558e-10	3.08279e-09	0.064682
ENSG00000185504	FAAP100	0.748123	1.40723e-10	3.19578e-09	0.122626
ENSG00000142235	LMTK3	1.13105	1.41905e-10	3.21862e-09	0.188446
ENSG00000116871	MAP7D1	0.976649	1.42685e-10	3.2323e-09	0.162231
ENSG00000134419	RPS15A	-1.05069	1.431e-10	3.23771e-09	0.171857
ENSG00000132017	DCAF15	0.574318	1.43499e-10	3.24273e-09	0.0925714
ENSG00000169727	GPS1	0.572769	1.46406e-10	3.30434e-09	0.0929051
ENSG00000184343	SRPK3	1.03946	1.52027e-10	3.42697e-09	0.17208
ENSG00000179862	CITED4	1.82334	1.53838e-10	3.46352e-09	0.315301
ENSG00000198830	HMGN2	0.380087	1.57735e-10	3.5469e-09	0.061314
ENSG00000266507	MIR4479	4.70643	1.57999e-10	3.54847e-09	0.894323
ENSG00000092201	SUPT16H	-0.332571	1.59659e-10	3.58137e-09	0.0527401
ENSG00000167657	DAPK3	0.861572	1.60001e-10	3.58464e-09	0.14223
ENSG00000133619	KRBA1	0.59592	1.63201e-10	3.65187e-09	0.0970867
ENSG00000108406	DHX40	-0.378448	1.64333e-10	3.66758e-09	0.0599091
ENSG00000169026	SLC49A3	1.2937	1.64876e-10	3.66758e-09	0.216869
ENSG00000174943	KCTD13	0.522569	1.64508e-10	3.66758e-09	0.0843792
ENSG00000184986	TMEM121	2.2984	1.64814e-10	3.66758e-09	0.416599
ENSG00000196712	NF1	-0.5392	1.64905e-10	3.66758e-09	0.0870972
ENSG00000225556	C2CD4D	1.49443	1.67707e-10	3.72537e-09	0.253673
ENSG00000110719	TCIRG1	1.03982	1.68442e-10	3.73717e-09	0.172983
ENSG00000167674	HDGFL2	0.7678	1.69253e-10	3.75061e-09	0.126496
ENSG00000142634	EFHD2	0.819892	1.69684e-10	3.75561e-09	0.135508
ENSG00000128585	MKLN1	-0.489063	1.79485e-10	3.96297e-09	0.0788759
ENSG00000169710	FASN	1.06333	1.79474e-10	3.96297e-09	0.177472
ENSG00000182628	SKA2	-0.460534	1.87723e-10	4.13985e-09	0.0741351
ENSG00000147804	SLC39A4	1.24185	1.94697e-10	4.2885e-09	0.209066
ENSG00000149243	KLHL35	1.30775	1.95632e-10	4.3039e-09	0.221763
ENSG00000071889	FAM3A	0.5915	1.97306e-10	4.33552e-09	0.0963579
ENSG00000198355	PIM3	1.35154	1.98861e-10	4.36445e-09	0.231129
ENSG00000172354	GNB2	0.671891	2.00146e-10	4.38739e-09	0.11037
ENSG00000127419	TMEM175	0.725191	2.00435e-10	4.38847e-09	0.119972
ENSG00000112339	HBS1L	-0.376508	2.03788e-10	4.45285e-09	0.0602627
ENSG00000126934	MAP2K2	0.750973	2.04105e-10	4.45285e-09	0.124233
ENSG00000185236	RAB11B	0.717036	2.03912e-10	4.45285e-09	0.118285
ENSG00000185246	PRPF39	-0.381635	2.05642e-10	4.48103e-09	0.0611856
ENSG00000185361	TNFAIP8L1	0.852868	2.08098e-10	4.52917e-09	0.141974
ENSG00000184990	SIVA1	0.624983	2.09798e-10	4.56074e-09	0.102871
ENSG00000123989	CHPF	1.21768	2.1044e-10	4.56927e-09	0.20643
ENSG00000156603	MED19	0.621554	2.10751e-10	4.57061e-09	0.101779
ENSG00000029364	SLC39A9	-0.442492	2.11323e-10	4.57758e-09	0.0708677
ENSG00000133112	TPT1	-0.689363	2.12957e-10	4.60753e-09	0.111943
ENSG00000211770	TRBJ2-6	1.56318	2.14831e-10	4.64259e-09	0.264994
ENSG00000099899	TRMT2A	0.581556	2.18929e-10	4.72557e-09	0.0947135
ENSG00000204370	SDHD	-0.618021	2.2463e-10	4.8429e-09	0.101636
ENSG00000159593	NAE1	-0.475705	2.26781e-10	4.88352e-09	0.0771411
ENSG00000170892	TSEN34	0.585109	2.2839e-10	4.9124e-09	0.0959352
ENSG00000103197	TSC2	0.570408	2.30302e-10	4.94772e-09	0.0924144
ENSG00000151461	UPF2	-0.349754	2.3219e-10	4.98243e-09	0.0560563
ENSG00000125534	PPDPF	1.43919	2.37665e-10	5.09295e-09	0.242955
ENSG00000183864	TOB2	0.378636	2.37897e-10	5.09295e-09	0.0608715
ENSG00000175634	RPS6KB2	0.354429	2.5342e-10	5.41893e-09	0.0574584
ENSG00000127870	RNF6	-0.315568	2.57848e-10	5.50717e-09	0.0505647
ENSG00000115020	PIKFYVE	-0.349541	2.5966e-10	5.53941e-09	0.0562132
ENSG00000137955	RABGGTB	-0.408039	2.65311e-10	5.65338e-09	0.0660648
ENSG00000169689	CENPX	0.676625	2.65969e-10	5.66081e-09	0.112005
ENSG00000196646	ZNF136	-0.538089	2.66925e-10	5.67456e-09	0.0876877
ENSG00000179632	MAF1	0.631315	2.7853e-10	5.9144e-09	0.103926
ENSG00000164713	BRI3	1.1117	2.85565e-10	6.05677e-09	0.187627
ENSG00000108840	HDAC5	0.62667	2.90316e-10	6.1504e-09	0.103444
ENSG00000176387	HSD11B2	2.01388	2.94691e-10	6.23586e-09	0.343718
ENSG00000158106	RHPN1	1.22984	2.95053e-10	6.23632e-09	0.208603
ENSG00000181045	SLC26A11	0.839558	3.06594e-10	6.47278e-09	0.140784
ENSG00000160999	SH2B2	1.45141	3.08264e-10	6.50053e-09	0.247097
ENSG00000036257	CUL3	-0.339465	3.10211e-10	6.53407e-09	0.0545637
ENSG00000064545	TMEM161A	0.788619	3.11795e-10	6.55987e-09	0.132259
ENSG00000162341	TPCN2	0.773967	3.18682e-10	6.69708e-09	0.129404
ENSG00000117859	OSBPL9	-0.477687	3.23563e-10	6.79186e-09	0.0783083
ENSG00000132004	FBXW9	0.763425	3.25533e-10	6.82539e-09	0.127528
ENSG00000126391	FRMD8	0.541264	3.29846e-10	6.9079e-09	0.0889543
ENSG00000087088	BAX	0.430773	3.3912e-10	7.094e-09	0.070057
ENSG00000106400	ZNHIT1	0.500932	3.49269e-10	7.29797e-09	0.0820934
ENSG00000117335	CD46	-0.295914	3.5118e-10	7.32953e-09	0.04772
ENSG00000237172	B3GNT9	1.09884	3.53438e-10	7.36825e-09	0.187071
ENSG00000149600	COMMD7	-0.354204	3.56463e-10	7.42286e-09	0.0575081
ENSG00000181090	EHMT1	0.538273	3.57341e-10	7.43269e-09	0.0884786
ENSG00000160460	SPTBN4	1.31216	3.58983e-10	7.45838e-09	0.22442
ENSG00000135637	CCDC142	0.557942	3.6447e-10	7.55522e-09	0.0921636
ENSG00000165669	FAM204A	-0.342793	3.64241e-10	7.55522e-09	0.0555384
ENSG00000100664	EIF5	-0.418726	3.70942e-10	7.67876e-09	0.0678773
ENSG00000110852	CLEC2B	-0.697606	3.71688e-10	7.67876e-09	0.116417
ENSG00000138592	USP8	-0.357362	3.71631e-10	7.67876e-09	0.0582106
ENSG00000119844	AFTPH	-0.337795	3.74325e-10	7.72451e-09	0.0548162
ENSG00000198839	ZNF277	-0.441977	3.82287e-10	7.87994e-09	0.072565
ENSG00000168071	CCDC88B	0.772462	3.85489e-10	7.93699e-09	0.129955
ENSG00000100425	BRD1	0.490775	3.87413e-10	7.96766e-09	0.0811162
ENSG00000163104	SMARCAD1	-0.467285	3.98163e-10	8.17954e-09	0.077654
ENSG00000126522	ASL	0.463332	4.11884e-10	8.45193e-09	0.0760906
ENSG00000105722	ERF	0.729262	4.14612e-10	8.48888e-09	0.122334
ENSG00000155561	NUP205	-0.390687	4.14292e-10	8.48888e-09	0.0637919
ENSG00000106258	CYP3A5	-0.531572	4.26148e-10	8.71531e-09	0.0879791
ENSG00000182858	ALG12	0.490213	4.32676e-10	8.83895e-09	0.0810066
ENSG00000224940	PRRT4	1.56495	4.61014e-10	9.40735e-09	0.268642
ENSG00000197858	GPAA1	0.798756	4.6181e-10	9.41311e-09	0.135867
ENSG00000090975	PITPNM2	1.0587	4.64674e-10	9.46095e-09	0.180603
ENSG00000171169	NAIF1	0.400698	4.6991e-10	9.55692e-09	0.0657053
ENSG00000168288	MMADHC	-0.417475	4.70882e-10	9.56606e-09	0.0686528
ENSG00000186111	PIP5K1C	0.836056	4.76495e-10	9.66937e-09	0.141832
ENSG00000166266	CUL5	-0.418549	4.82843e-10	9.78733e-09	0.0688616
ENSG00000187676	B3GLCT	-0.486822	5.06016e-10	1.02416e-08	0.0806149
ENSG00000198569	SLC34A3	1.48684	5.06375e-10	1.02416e-08	0.260822
ENSG00000157426	AASDH	-0.507525	5.1152e-10	1.03343e-08	0.0841438
ENSG00000198832	SELENOM	1.07549	5.13103e-10	1.03548e-08	0.185062
ENSG00000142546	NOSIP	0.623985	5.18967e-10	1.04616e-08	0.104846
ENSG00000175701	MTLN	0.81993	5.20875e-10	1.04886e-08	0.140169
ENSG00000127054	INTS11	0.449685	5.2903e-10	1.06177e-08	0.0743704
ENSG00000171206	TRIM8	0.598171	5.28597e-10	1.06177e-08	0.100814
ENSG00000215440	NPEPL1	0.853061	5.28556e-10	1.06177e-08	0.145841
ENSG00000168228	ZCCHC4	-0.446559	5.3114e-10	1.06484e-08	0.0736837
ENSG00000235863	B3GALT4	0.554988	5.36328e-10	1.07406e-08	0.0927719
ENSG00000160360	GPSM1	1.08101	5.3866e-10	1.07756e-08	0.186125
ENSG00000187961	KLHL17	0.826158	5.50333e-10	1.09971e-08	0.140592
ENSG00000155085	AK9	-0.593748	5.56664e-10	1.11114e-08	0.0994989
ENSG00000173327	MAP3K11	0.865419	5.64896e-10	1.12635e-08	0.147436
ENSG00000105669	COPE	0.624007	5.75321e-10	1.14588e-08	0.105462
ENSG00000159692	CTBP1	0.571544	5.76229e-10	1.14628e-08	0.095814
ENSG00000182973	CNOT10	-0.346328	5.7677e-10	1.14628e-08	0.0568169
ENSG00000126767	ELK1	0.530071	5.78355e-10	1.14818e-08	0.0883783
ENSG00000184524	CEND1	1.75527	5.8357e-10	1.15728e-08	0.30574
ENSG00000173581	CCDC106	1.04229	5.86063e-10	1.16096e-08	0.179297
ENSG00000115257	PCSK4	1.20874	5.88277e-10	1.1624e-08	0.209318
ENSG00000174953	DHX36	-0.384181	5.88693e-10	1.1624e-08	0.063196
ENSG00000186577	SMIM29	0.69177	5.87528e-10	1.1624e-08	0.117403
ENSG00000141424	SLC39A6	-0.398951	6.08974e-10	1.20115e-08	0.0658598
ENSG00000100399	CHADL	1.5173	6.10814e-10	1.20348e-08	0.263212
ENSG00000078808	SDF4	0.670408	6.48127e-10	1.27562e-08	0.113813
ENSG00000261236	BOP1	0.942976	6.55622e-10	1.28899e-08	0.163404
ENSG00000087470	DNM1L	-0.363735	6.5708e-10	1.29047e-08	0.0600078
ENSG00000125676	THOC2	-0.376548	6.78315e-10	1.33075e-08	0.062175
ENSG00000105429	MEGF8	0.749295	6.80793e-10	1.33418e-08	0.127614
ENSG00000105516	DBP	0.976381	6.84819e-10	1.34063e-08	0.17038
ENSG00000162572	SCNN1D	0.988264	6.90485e-10	1.35028e-08	0.17101
ENSG00000104903	LYL1	1.41952	6.93159e-10	1.35406e-08	0.251025
ENSG00000113522	RAD50	0.638483	6.95205e-10	1.35661e-08	0.107955
ENSG00000143106	PSMA5	-0.50173	7.00527e-10	1.36297e-08	0.0839281
ENSG00000167967	E4F1	0.814658	6.9988e-10	1.36297e-08	0.13953
ENSG00000273576	NA	-0.743441	7.00697e-10	1.36297e-08	0.126534
ENSG00000095906	NUBP2	0.802108	7.02461e-10	1.36495e-08	0.137752
ENSG00000154305	MIA3	-0.392714	7.04472e-10	1.36741e-08	0.0650389
ENSG00000159753	CARMIL2	0.734361	7.16968e-10	1.39019e-08	0.125265
ENSG00000157911	PEX10	0.889244	7.31166e-10	1.41622e-08	0.153507
ENSG00000164463	CREBRF	-0.594625	7.45529e-10	1.44251e-08	0.100425
ENSG00000264493	MIR4298	1.75995	7.50991e-10	1.45155e-08	0.308039
ENSG00000163636	PSMD6	-0.344095	7.72002e-10	1.49058e-08	0.0568875
ENSG00000137656	BUD13	-0.365897	7.73699e-10	1.49229e-08	0.0608634
ENSG00000125970	RALY	0.403312	7.80492e-10	1.5038e-08	0.0670497
ENSG00000123179	EBPL	0.918672	7.83329e-10	1.50768e-08	0.158228
ENSG00000141569	TRIM65	0.495546	7.8659e-10	1.51237e-08	0.0825254
ENSG00000183530	PRR14L	-0.395277	7.89481e-10	1.51633e-08	0.0656913
ENSG00000147119	CHST7	1.82067	7.91113e-10	1.51787e-08	0.326686
ENSG00000144224	UBXN4	-0.255879	7.92639e-10	1.51921e-08	0.041951
ENSG00000128607	KLHDC10	-0.365101	7.98808e-10	1.52943e-08	0.0605051
ENSG00000161091	MFSD12	0.852998	8.00597e-10	1.53126e-08	0.147839
ENSG00000173230	GOLGB1	-0.466877	8.08601e-10	1.54495e-08	0.0782868
ENSG00000084676	NCOA1	-0.466103	8.16617e-10	1.55864e-08	0.0784832
ENSG00000133247	KMT5C	1.03062	8.21582e-10	1.56485e-08	0.178835
ENSG00000177947	ODF3	2.57271	8.20917e-10	1.56485e-08	0.454432
ENSG00000169758	TMEM266	0.86856	8.33278e-10	1.58548e-08	0.150008
ENSG00000130299	GTPBP3	0.709467	8.40114e-10	1.59517e-08	0.121427
ENSG00000278053	DDX52	-0.352964	8.3961e-10	1.59517e-08	0.0584929
ENSG00000138081	FBXO11	-0.317728	8.51109e-10	1.61437e-08	0.0522352
ENSG00000181027	FKRP	0.710574	8.72671e-10	1.65356e-08	0.122183
ENSG00000108557	RAI1	0.680524	8.79181e-10	1.66417e-08	0.117486
ENSG00000245848	CEBPA	1.69041	8.80948e-10	1.66579e-08	0.301023
ENSG00000149927	DOC2A	1.99429	9.03017e-10	1.70576e-08	0.353826
ENSG00000122692	SMU1	-0.375048	9.07097e-10	1.7117e-08	0.062571
ENSG00000213213	CCDC183	0.851276	9.2363e-10	1.7411e-08	0.147333
ENSG00000160404	TOR2A	0.592945	9.36964e-10	1.76442e-08	0.100818
ENSG00000100146	SOX10	1.66772	9.51165e-10	1.78932e-08	0.294443
ENSG00000105364	MRPL4	0.601808	9.54363e-10	1.7935e-08	0.102563
ENSG00000188747	NOXA1	1.25125	9.57083e-10	1.79676e-08	0.222437
ENSG00000156521	TYSND1	0.61864	9.60661e-10	1.80163e-08	0.105388
ENSG00000104907	TRMT1	0.481388	9.62035e-10	1.80236e-08	0.0806748
ENSG00000184163	C1QTNF12	1.28233	9.70399e-10	1.81617e-08	0.225588
ENSG00000178913	TAF7	-0.409901	9.8276e-10	1.83743e-08	0.0686606
ENSG00000187522	HSPA14	-0.440064	9.86303e-10	1.84217e-08	0.0739183
ENSG00000096401	CDC5L	-0.332098	9.96044e-10	1.85847e-08	0.0552949
ENSG00000197363	ZNF517	0.591245	1.01477e-09	1.89149e-08	0.100703
ENSG00000100982	PCIF1	0.302607	1.02364e-09	1.90608e-08	0.0509853
ENSG00000186564	FOXD2	0.999913	1.04125e-09	1.93689e-08	0.174877
ENSG00000232434	AJM1	1.56594	1.05398e-09	1.95859e-08	0.282602
ENSG00000124574	ABCC10	0.560693	1.06935e-09	1.98512e-08	0.0948291
ENSG00000177169	ULK1	0.726278	1.08195e-09	2.00648e-08	0.124819
ENSG00000083838	ZNF446	0.580177	1.08726e-09	2.01429e-08	0.099115
ENSG00000111684	LPCAT3	0.477245	1.09848e-09	2.03302e-08	0.0806152
ENSG00000119402	FBXW2	-0.308735	1.11175e-09	2.05551e-08	0.0504926
ENSG00000132470	ITGB4	1.14527	1.11458e-09	2.05866e-08	0.201397
ENSG00000164414	SLC35A1	-0.684659	1.14175e-09	2.10672e-08	0.118223
ENSG00000259956	RBM15B	0.35201	1.15734e-09	2.13333e-08	0.0588129
ENSG00000205250	E2F4	0.319648	1.1595e-09	2.13517e-08	0.0533527
ENSG00000196642	RABL6	0.713765	1.18376e-09	2.17765e-08	0.124115
ENSG00000140983	RHOT2	0.719269	1.20024e-09	2.20575e-08	0.124307
ENSG00000131591	C1orf159	0.785482	1.20913e-09	2.21984e-08	0.136399
ENSG00000123810	B9D2	0.514842	1.22173e-09	2.24073e-08	0.0876103
ENSG00000069509	FUNDC1	-0.523782	1.22442e-09	2.24342e-08	0.0893081
ENSG00000130545	CRB3	1.1045	1.22684e-09	2.24562e-08	0.194324
ENSG00000172534	HCFC1	0.502813	1.23109e-09	2.25114e-08	0.0855916
ENSG00000110697	PITPNM1	0.772463	1.25341e-09	2.28965e-08	0.135526
ENSG00000104756	KCTD9	-0.412767	1.27181e-09	2.32096e-08	0.069438
ENSG00000136490	LIMD2	0.837986	1.28225e-09	2.33768e-08	0.146214
ENSG00000171219	CDC42BPG	0.945714	1.28358e-09	2.33777e-08	0.165589
ENSG00000122490	SLC66A2	0.863502	1.31672e-09	2.39575e-08	0.151813
ENSG00000120837	NFYB	-0.366992	1.33365e-09	2.42415e-08	0.0617403
ENSG00000205090	TMEM240	1.61181	1.34767e-09	2.4472e-08	0.286506
ENSG00000141551	CSNK1D	0.42948	1.37468e-09	2.49377e-08	0.0727146
ENSG00000111670	GNPTAB	-0.42979	1.40383e-09	2.54414e-08	0.0728435
ENSG00000197136	PCNX3	0.62688	1.43566e-09	2.59925e-08	0.108872
ENSG00000147874	HAUS6	-0.447953	1.44632e-09	2.61595e-08	0.076028
ENSG00000196498	NCOR2	0.957087	1.45426e-09	2.62771e-08	0.169057
ENSG00000055917	PUM2	-0.311246	1.47335e-09	2.65959e-08	0.0514339
ENSG00000151292	CSNK1G3	-0.431045	1.50918e-09	2.72158e-08	0.0734185
ENSG00000060971	ACAA1	0.464858	1.53715e-09	2.76929e-08	0.0794849
ENSG00000196954	CASP4	-0.7014	1.55261e-09	2.79439e-08	0.12214
ENSG00000163930	BAP1	0.273966	1.58766e-09	2.85467e-08	0.0459146
ENSG00000121775	TMEM39B	0.453909	1.6111e-09	2.89398e-08	0.0773814
ENSG00000083520	DIS3	-0.334636	1.61434e-09	2.89694e-08	0.0573431
ENSG00000099822	HCN2	1.27221	1.61654e-09	2.89806e-08	0.227627
ENSG00000105613	MAST1	1.28479	1.62975e-09	2.91317e-08	0.229629
ENSG00000161013	MGAT4B	0.763897	1.62722e-09	2.91317e-08	0.133611
ENSG00000181638	ZFP41	0.664417	1.62834e-09	2.91317e-08	0.114798
ENSG00000162032	SPSB3	2.09773	1.66141e-09	2.96688e-08	0.377899
ENSG00000184575	XPOT	-0.346761	1.66611e-09	2.97237e-08	0.058551
ENSG00000116747	RO60	-0.426908	1.67018e-09	2.97455e-08	0.0726084
ENSG00000163608	NEPRO	-0.455909	1.67058e-09	2.97455e-08	0.0773603
ENSG00000123064	DDX54	0.664078	1.67295e-09	2.97587e-08	0.115162
ENSG00000135722	FBXL8	0.929312	1.69856e-09	3.01849e-08	0.164737
ENSG00000088930	XRN2	-0.349787	1.71668e-09	3.04477e-08	0.0588511
ENSG00000173080	RXFP4	2.60717	1.71663e-09	3.04477e-08	0.47424
ENSG00000157353	FCSK	0.630795	1.72627e-09	3.05883e-08	0.109633
ENSG00000185347	TEDC1	0.84402	1.74845e-09	3.09513e-08	0.149419
ENSG00000005700	IBTK	-0.398663	1.75237e-09	3.09907e-08	0.067807
ENSG00000100815	TRIP11	-0.46887	1.76046e-09	3.11036e-08	0.0803353
ENSG00000068831	RASGRP2	0.926758	1.78805e-09	3.15608e-08	0.164678
ENSG00000060749	QSER1	-0.553408	1.7998e-09	3.17375e-08	0.095726
ENSG00000185515	BRCC3	-0.450261	1.81043e-09	3.18942e-08	0.0769003
ENSG00000130881	LRP3	1.73179	1.84922e-09	3.25463e-08	0.316651
ENSG00000165688	PMPCA	0.374149	1.87671e-09	3.29984e-08	0.0636968
ENSG00000164332	UBLCP1	-0.305821	1.88068e-09	3.30364e-08	0.0516202
ENSG00000173272	MZT2A	1.04279	1.88536e-09	3.30869e-08	0.187943
ENSG00000171700	RGS19	0.963692	1.89092e-09	3.31527e-08	0.171652
ENSG00000155868	MED7	-0.324391	1.90908e-09	3.34391e-08	0.054878
ENSG00000013306	SLC25A39	0.550973	1.96607e-09	3.44043e-08	0.0945196
ENSG00000113119	TMCO6	0.520569	1.99027e-09	3.47946e-08	0.0898029
ENSG00000120686	UFM1	-0.403694	2.02117e-09	3.52673e-08	0.0689704
ENSG00000174177	CTU2	0.674338	2.02114e-09	3.52673e-08	0.11817
ENSG00000139546	TARBP2	0.403781	2.03956e-09	3.55544e-08	0.0689496
ENSG00000110713	NUP98	-0.26866	2.11793e-09	3.68854e-08	0.0453303
ENSG00000051596	THOC3	0.966666	2.1249e-09	3.69366e-08	0.172021
ENSG00000170619	COMMD5	0.703984	2.12402e-09	3.69366e-08	0.123808
ENSG00000162819	BROX	-0.40509	2.18657e-09	3.79364e-08	0.0697629
ENSG00000188807	TMEM201	0.700956	2.18638e-09	3.79364e-08	0.123204
ENSG00000099769	IGFALS	1.52709	2.23529e-09	3.8745e-08	0.277255
ENSG00000116977	LGALS8	-0.390003	2.29032e-09	3.96437e-08	0.0677035
ENSG00000198113	TOR4A	1.42299	2.29147e-09	3.96437e-08	0.26057
ENSG00000251322	SHANK3	1.82668	2.30885e-09	3.99067e-08	0.331991
ENSG00000006118	TMEM132A	1.68416	2.34552e-09	4.05022e-08	0.31193
ENSG00000138785	INTS12	-0.454572	2.3558e-09	4.06414e-08	0.0783431
ENSG00000073614	KDM5A	-0.314823	2.37028e-09	4.08527e-08	0.053941
ENSG00000114166	KAT2B	-0.526057	2.47352e-09	4.2592e-08	0.0922997
ENSG00000172175	MALT1	-0.470298	2.55036e-09	4.38738e-08	0.0812887
ENSG00000161031	PGLYRP2	1.4576	2.60841e-09	4.48304e-08	0.265551
ENSG00000196961	AP2A1	0.627888	2.62345e-09	4.50466e-08	0.110681
ENSG00000153037	SRP19	-0.380844	2.66683e-09	4.57485e-08	0.0653923
ENSG00000196365	LONP1	0.665742	2.70629e-09	4.63819e-08	0.117402
ENSG00000115540	MOB4	-0.448162	2.7534e-09	4.71452e-08	0.0775458
ENSG00000140474	ULK3	0.47108	2.78128e-09	4.75781e-08	0.0816261
ENSG00000028203	VEZT	-0.37958	2.83027e-09	4.8371e-08	0.0654794
ENSG00000101213	PTK6	0.74416	2.83942e-09	4.8482e-08	0.131984
ENSG00000114626	ABTB1	0.505232	2.8563e-09	4.87248e-08	0.0886709
ENSG00000104886	PLEKHJ1	0.646837	2.87075e-09	4.89257e-08	0.114717
ENSG00000119041	GTF3C3	-0.36837	2.87372e-09	4.89308e-08	0.0632691
ENSG00000114098	ARMC8	-0.308954	2.89589e-09	4.92625e-08	0.0533976
ENSG00000074855	ANO8	0.903039	2.92978e-09	4.97927e-08	0.162187
ENSG00000114767	RRP9	0.58136	2.97491e-09	5.04659e-08	0.102244
ENSG00000136436	CALCOCO2	-0.51103	2.9724e-09	5.04659e-08	0.0896843
ENSG00000125746	EML2	0.317744	3.0081e-09	5.09817e-08	0.0544284
ENSG00000165655	ZNF503	1.46443	3.13884e-09	5.31483e-08	0.267713
ENSG00000140718	FTO	-0.352147	3.14206e-09	5.31537e-08	0.0605815
ENSG00000079134	THOC1	-0.426376	3.20547e-09	5.41764e-08	0.0739436
ENSG00000145723	GIN1	-0.49835	3.24342e-09	5.47671e-08	0.087057
ENSG00000204525	HLA-C	0.555933	3.25167e-09	5.48558e-08	0.0976917
ENSG00000114125	RNF7	-0.371444	3.26346e-09	5.5004e-08	0.0642636
ENSG00000187147	RNF220	0.298343	3.28632e-09	5.53383e-08	0.0512087
ENSG00000167470	MIDN	0.871902	3.30767e-09	5.56466e-08	0.159013
ENSG00000286025	FAM246C	1.10959	3.32919e-09	5.59573e-08	0.202174
ENSG00000101126	ADNP	-0.331576	3.39153e-09	5.69528e-08	0.0570451
ENSG00000117528	ABCD3	-0.501287	3.41035e-09	5.72164e-08	0.0881065
ENSG00000108443	RPS6KB1	-0.437071	3.4471e-09	5.778e-08	0.0760248
ENSG00000054118	THRAP3	-0.283424	3.4642e-09	5.80134e-08	0.0485575
ENSG00000196363	WDR5	0.318414	3.48809e-09	5.83601e-08	0.0542827
ENSG00000130244	FAM98C	0.566058	3.54303e-09	5.92252e-08	0.099885
ENSG00000160193	WDR4	0.695091	3.61222e-09	6.03267e-08	0.123864
ENSG00000114554	PLXNA1	1.02129	3.63162e-09	6.05954e-08	0.186363
ENSG00000157181	ODR4	-0.456788	3.64294e-09	6.07289e-08	0.0797533
ENSG00000128185	DGCR6L	0.793705	3.80182e-09	6.33199e-08	0.143521
ENSG00000144589	STK11IP	0.422448	3.82638e-09	6.3671e-08	0.073298
ENSG00000166166	TRMT61A	0.862001	3.96495e-09	6.59169e-08	0.156624
ENSG00000137714	FDX1	0.88275	4.05772e-09	6.73979e-08	0.159811
ENSG00000175105	ZNF654	-0.501777	4.09785e-09	6.80028e-08	0.0884078
ENSG00000156860	FBRS	0.67426	4.10402e-09	6.80434e-08	0.120647
ENSG00000077514	POLD3	-0.399016	4.21215e-09	6.97731e-08	0.0695428
ENSG00000121067	SPOP	-0.207525	4.23184e-09	7.00358e-08	0.0355441
ENSG00000009307	CSDE1	-0.365747	4.2545e-09	7.03473e-08	0.0634974
ENSG00000088451	TGDS	-0.418192	4.27582e-09	7.06051e-08	0.0732397
ENSG00000183018	SPNS2	1.03468	4.27781e-09	7.06051e-08	0.189779
ENSG00000166126	AMN	1.64639	4.29966e-09	7.09018e-08	0.305048
ENSG00000104853	CLPTM1	0.43024	4.44117e-09	7.3135e-08	0.0754478
ENSG00000134461	ANKRD16	0.799824	4.44308e-09	7.3135e-08	0.144524
ENSG00000138182	KIF20B	-0.781357	4.4567e-09	7.32934e-08	0.142022
ENSG00000275183	LENG9	1.31571	4.57678e-09	7.52005e-08	0.245768
ENSG00000122565	CBX3	-0.290318	4.78037e-09	7.84752e-08	0.0513093
ENSG00000205356	TECPR1	0.643044	4.8345e-09	7.92928e-08	0.114008
ENSG00000039123	MTREX	-0.418003	4.85673e-09	7.95861e-08	0.0733841
ENSG00000072501	SMC1A	-0.227461	5.02047e-09	8.21956e-08	0.0392375
ENSG00000154114	TBCEL	-0.407628	5.02747e-09	8.22367e-08	0.0715031
ENSG00000148229	POLE3	-0.373028	5.09927e-09	8.33366e-08	0.0647562
ENSG00000171150	SOCS5	-0.229505	5.113e-09	8.34864e-08	0.0395361
ENSG00000101882	NKAP	-0.356189	5.20199e-09	8.47883e-08	0.0621919
ENSG00000104883	PEX11G	1.27683	5.20132e-09	8.47883e-08	0.237048
ENSG00000168096	ANKS3	0.547064	5.21063e-09	8.48535e-08	0.0975338
ENSG00000100156	SLC16A8	1.37566	5.22934e-09	8.50826e-08	0.256569
ENSG00000197982	C1orf122	1.37966	5.25425e-09	8.5412e-08	0.257999
ENSG00000167635	ZNF146	-0.468302	5.30733e-09	8.61981e-08	0.083548
ENSG00000079435	LIPE	0.865162	5.31325e-09	8.62178e-08	0.158055
ENSG00000112419	PHACTR2	-0.685036	5.34665e-09	8.66063e-08	0.123616
ENSG00000173226	IQCB1	-0.38291	5.34223e-09	8.66063e-08	0.0671892
ENSG00000177383	MAGEF1	0.628966	5.35715e-09	8.66995e-08	0.112865
ENSG00000114383	TUSC2	0.534319	5.362e-09	8.67014e-08	0.0953395
ENSG00000275342	PRAG1	0.865928	5.41659e-09	8.75069e-08	0.158934
ENSG00000096872	IFT74	-0.526435	5.5308e-09	8.92281e-08	0.0939414
ENSG00000143947	RPS27A	-0.580166	5.53289e-09	8.92281e-08	0.102559
ENSG00000185453	ZSWIM9	0.765113	5.55892e-09	8.9569e-08	0.139174
ENSG00000186298	PPP1CC	-0.318974	5.71766e-09	9.20457e-08	0.0562578
ENSG00000197062	ZSCAN26	-0.585539	5.74778e-09	9.24494e-08	0.105274
ENSG00000132952	USPL1	-0.442716	5.94207e-09	9.54904e-08	0.0783576
ENSG00000266232	MIR3178	2.51454	5.99877e-09	9.63171e-08	0.468452
ENSG00000121680	PEX16	0.560027	6.31037e-09	1.01231e-07	0.100143
ENSG00000163794	UCN	1.26912	6.34262e-09	1.0166e-07	0.240225
ENSG00000130818	ZNF426	-0.397609	6.37915e-09	1.02156e-07	0.070162
ENSG00000162441	LZIC	-0.305186	6.49796e-09	1.03967e-07	0.0534251
ENSG00000106003	LFNG	0.736028	6.58334e-09	1.05218e-07	0.13496
ENSG00000256087	ZNF432	-0.488231	6.5876e-09	1.05218e-07	0.0865102
ENSG00000131408	NR1H2	0.661333	6.64641e-09	1.05972e-07	0.120089
ENSG00000167548	KMT2D	0.508537	6.64387e-09	1.05972e-07	0.091454
ENSG00000112343	TRIM38	-0.4805	6.65532e-09	1.06022e-07	0.0858027
ENSG00000119446	RBM18	-0.369752	6.72414e-09	1.07025e-07	0.065426
ENSG00000162066	AMDHD2	1.00655	6.74542e-09	1.0727e-07	0.187465
ENSG00000177189	RPS6KA3	-0.396288	6.93514e-09	1.10192e-07	0.0710376
ENSG00000228594	FNDC10	1.37002	7.00807e-09	1.11254e-07	0.259483
ENSG00000070501	POLB	-0.493987	7.04927e-09	1.11811e-07	0.0883037
ENSG00000174326	SLC16A11	1.51355	7.10734e-09	1.12634e-07	0.284746
ENSG00000124207	CSE1L	-0.414673	7.14221e-09	1.13089e-07	0.0725989
ENSG00000136100	VPS36	-0.282429	7.17263e-09	1.13473e-07	0.0490779
ENSG00000100263	RHBDD3	0.779415	7.18955e-09	1.13544e-07	0.144167
ENSG00000228672	PROB1	1.07528	7.18382e-09	1.13544e-07	0.199992
ENSG00000091009	RBM27	-0.504339	7.28946e-09	1.15023e-07	0.0906157
ENSG00000110046	ATG2A	0.740794	7.3149e-09	1.15325e-07	0.134722
ENSG00000186891	TNFRSF18	1.36938	7.35208e-09	1.15811e-07	0.259909
ENSG00000104231	ZFAND1	-0.519177	7.36677e-09	1.15943e-07	0.093288
ENSG00000147813	NAPRT	0.935744	7.43207e-09	1.1687e-07	0.1736
ENSG00000160570	DEDD2	0.813775	7.44774e-09	1.17016e-07	0.149838
ENSG00000138606	SHF	0.752299	7.72625e-09	1.21288e-07	0.138242
ENSG00000144747	TMF1	-0.264578	7.83332e-09	1.22863e-07	0.0463437
ENSG00000142330	CAPN10	0.727843	7.84412e-09	1.22927e-07	0.133515
ENSG00000196466	ZNF799	-0.562314	8.00868e-09	1.25399e-07	0.10165
ENSG00000072958	AP1M1	0.407132	8.02835e-09	1.25599e-07	0.0730425
ENSG00000117697	NSL1	-0.336899	8.06155e-09	1.26011e-07	0.0592625
ENSG00000198728	LDB1	0.358488	8.18588e-09	1.27845e-07	0.0635607
ENSG00000100836	PABPN1	0.465748	8.24064e-09	1.2859e-07	0.0837299
ENSG00000204308	RNF5	0.433976	8.29897e-09	1.2939e-07	0.0775695
ENSG00000135521	LTV1	-0.522997	8.33695e-09	1.29872e-07	0.0944293
ENSG00000010017	RANBP9	-0.342063	8.5763e-09	1.33487e-07	0.0605501
ENSG00000175354	PTPN2	-0.35778	8.65361e-09	1.34576e-07	0.0634131
ENSG00000099910	KLHL22	0.40849	8.71105e-09	1.35354e-07	0.0728363
ENSG00000141985	SH3GL1	0.704097	8.90012e-09	1.38057e-07	0.129482
ENSG00000224578	HNRNPA1L3	0.570977	8.89417e-09	1.38057e-07	0.103512
ENSG00000142655	PEX14	0.465926	8.92093e-09	1.38263e-07	0.0838565
ENSG00000181029	TRAPPC5	1.11452	8.94804e-09	1.38566e-07	0.21019
ENSG00000165684	SNAPC4	0.69328	8.95841e-09	1.38609e-07	0.127256
ENSG00000160959	LRRC14	0.467682	9.04782e-09	1.39874e-07	0.0840651
ENSG00000175582	RAB6A	-0.42054	9.09882e-09	1.40544e-07	0.0754003
ENSG00000155428	TRIM74	1.27783	9.15201e-09	1.41127e-07	0.242116
ENSG00000178814	OPLAH	1.31631	9.14798e-09	1.41127e-07	0.250098
ENSG00000100749	VRK1	-0.366895	9.1751e-09	1.41364e-07	0.0653288
ENSG00000135945	REV1	-0.333263	9.24533e-09	1.42327e-07	0.0593247
ENSG00000133962	CATSPERB	-0.945305	9.28387e-09	1.4256e-07	0.177101
ENSG00000141380	SS18	-0.323818	9.27658e-09	1.4256e-07	0.0573652
ENSG00000198171	DDRGK1	0.499816	9.27672e-09	1.4256e-07	0.0900348
ENSG00000130311	DDA1	0.411539	9.32991e-09	1.43147e-07	0.074114
ENSG00000198816	ZNF358	0.964954	9.34534e-09	1.43264e-07	0.181519
ENSG00000112305	SMAP1	0.444597	9.41016e-09	1.44137e-07	0.0797985
ENSG00000165689	ENTR1	0.376585	9.44622e-09	1.44568e-07	0.0672745
ENSG00000167325	RRM1	-0.363189	9.49764e-09	1.45234e-07	0.0652453
ENSG00000143155	TIPRL	-0.380545	9.59511e-09	1.46602e-07	0.0678706
ENSG00000165716	DIPK1B	1.13162	9.63328e-09	1.47062e-07	0.212813
ENSG00000170471	RALGAPB	-0.32396	9.73462e-09	1.48485e-07	0.0572566
ENSG00000097033	SH3GLB1	-0.391275	9.79922e-09	1.49222e-07	0.0699017
ENSG00000100151	PICK1	0.494268	9.79402e-09	1.49222e-07	0.0892823
ENSG00000106524	ANKMY2	-0.53671	9.81283e-09	1.49305e-07	0.0974668
ENSG00000159459	UBR1	-0.418563	9.8435e-09	1.49647e-07	0.0750247
ENSG00000212864	RNF208	1.59243	1.0084e-08	1.53177e-07	0.307864
ENSG00000197579	TOPORS	-0.47645	1.03418e-08	1.56962e-07	0.0862983
ENSG00000167562	ZNF701	-0.462883	1.05301e-08	1.59688e-07	0.0835346
ENSG00000149930	TAOK2	0.440589	1.08916e-08	1.64916e-07	0.0788541
ENSG00000179051	RCC2	0.476937	1.08929e-08	1.64916e-07	0.0862818
ENSG00000114209	PDCD10	-0.456733	1.09205e-08	1.65198e-07	0.0824862
ENSG00000138073	PREB	0.428504	1.09746e-08	1.65879e-07	0.0767656
ENSG00000121964	GTDC1	-0.422764	1.11191e-08	1.67785e-07	0.0762037
ENSG00000137040	RANBP6	-0.413282	1.11162e-08	1.67785e-07	0.0742213
ENSG00000113615	SEC24A	-0.404318	1.11415e-08	1.67985e-07	0.0726292
ENSG00000115286	NDUFS7	0.692654	1.12092e-08	1.68803e-07	0.128379
ENSG00000139574	NPFF	0.936791	1.12142e-08	1.68803e-07	0.176015
ENSG00000180957	PITPNB	-0.3248	1.12956e-08	1.69889e-07	0.0578815
ENSG00000114654	EFCC1	2.13285	1.14172e-08	1.71577e-07	0.408929
ENSG00000117475	BLZF1	-0.457803	1.14752e-08	1.72307e-07	0.0827992
ENSG00000073067	CYP2W1	1.97601	1.15584e-08	1.73413e-07	0.378686
ENSG00000159917	ZNF235	-0.41017	1.17117e-08	1.75571e-07	0.0738371
ENSG00000188305	PEAK3	1.28795	1.17468e-08	1.75952e-07	0.246928
ENSG00000169951	ZNF764	0.594127	1.18059e-08	1.76693e-07	0.109495
ENSG00000088038	CNOT3	0.431929	1.18448e-08	1.7713e-07	0.0780356
ENSG00000168140	VASN	0.99666	1.23084e-08	1.83913e-07	0.188484
ENSG00000197562	RAB40C	0.820641	1.23513e-08	1.84403e-07	0.153993
ENSG00000067334	DNTTIP2	-0.484753	1.24765e-08	1.86121e-07	0.0893262
ENSG00000180182	MED14	-0.358899	1.26149e-08	1.88031e-07	0.0641254
ENSG00000103174	NAGPA	0.520137	1.26979e-08	1.89114e-07	0.0952414
ENSG00000152457	DCLRE1C	-0.404648	1.31042e-08	1.95007e-07	0.0729744
ENSG00000113580	NR3C1	-0.525391	1.31792e-08	1.95964e-07	0.0959713
ENSG00000111581	NUP107	-0.37531	1.32719e-08	1.97182e-07	0.0676546
ENSG00000149658	YTHDF1	0.256988	1.34269e-08	1.99324e-07	0.0457697
ENSG00000173020	GRK2	0.622884	1.36935e-08	2.03117e-07	0.116195
ENSG00000023041	ZDHHC6	-0.333143	1.40151e-08	2.07719e-07	0.0598095
ENSG00000086506	HBQ1	2.95455	1.45786e-08	2.15895e-07	0.564113
ENSG00000030066	NUP160	-0.38759	1.51473e-08	2.24136e-07	0.0701773
ENSG00000144579	CTDSP1	0.445203	1.51677e-08	2.24256e-07	0.0812971
ENSG00000198521	ZNF43	-0.42391	1.54387e-08	2.28079e-07	0.0771017
ENSG00000099625	CBARP	2.80654	1.5647e-08	2.30413e-07	0.579251
ENSG00000136870	ZNF189	-0.358477	1.56316e-08	2.30413e-07	0.064762
ENSG00000167770	OTUB1	0.28918	1.56469e-08	2.30413e-07	0.0516963
ENSG00000197119	SLC25A29	1.17142	1.56101e-08	2.30413e-07	0.225787
ENSG00000133243	BTBD2	0.71101	1.59928e-08	2.35315e-07	0.133509
ENSG00000111880	RNGTT	-0.342964	1.61379e-08	2.37259e-07	0.0619391
ENSG00000006652	IFRD1	-0.543024	1.63035e-08	2.39502e-07	0.10036
ENSG00000196428	TSC22D2	0.392347	1.67362e-08	2.45661e-07	0.0706169
ENSG00000103249	CLCN7	0.770418	1.68406e-08	2.46996e-07	0.145151
ENSG00000157881	PANK4	0.510004	1.73107e-08	2.53687e-07	0.0939637
ENSG00000100105	PATZ1	0.517931	1.73977e-08	2.54758e-07	0.0956909
ENSG00000130305	NSUN5	0.463281	1.74475e-08	2.55283e-07	0.0855325
ENSG00000214253	FIS1	0.285836	1.77879e-08	2.60055e-07	0.0515697
ENSG00000057663	ATG5	-0.370598	1.81566e-08	2.65234e-07	0.0674225
ENSG00000157637	SLC38A10	0.660619	1.82082e-08	2.65776e-07	0.124052
ENSG00000254004	ZNF260	-0.433221	1.84142e-08	2.68568e-07	0.0793347
ENSG00000151466	SCLT1	-0.553065	1.85549e-08	2.70405e-07	0.103595
ENSG00000170075	GPR37L1	1.85126	1.87255e-08	2.72674e-07	0.361892
ENSG00000125447	GGA3	0.181925	1.87776e-08	2.73215e-07	0.032661
ENSG00000125356	NDUFA1	-0.522124	1.90316e-08	2.76691e-07	0.0968299
ENSG00000070476	ZXDC	0.35071	1.90988e-08	2.77448e-07	0.0636353
ENSG00000108506	INTS2	-0.352296	1.92553e-08	2.795e-07	0.0640795
ENSG00000132024	CC2D1A	0.512661	1.9307e-08	2.80028e-07	0.0946165
ENSG00000105643	ARRDC2	0.549618	1.94942e-08	2.82519e-07	0.102274
ENSG00000140988	RPS2	0.61495	1.95537e-08	2.83157e-07	0.118318
ENSG00000115756	HPCAL1	0.715032	1.95825e-08	2.8335e-07	0.135399
ENSG00000239306	RBM14	0.338676	1.97605e-08	2.857e-07	0.0615604
ENSG00000159885	ZNF222	-0.519172	1.98467e-08	2.8672e-07	0.09647
ENSG00000162068	NTN3	2.39668	2.00791e-08	2.89849e-07	0.47599
ENSG00000178026	LRRC75B	1.02514	2.01565e-08	2.90737e-07	0.199071
ENSG00000111877	MCM9	-0.391536	2.03444e-08	2.93203e-07	0.0716304
ENSG00000166024	R3HCC1L	-0.480701	2.03596e-08	2.93203e-07	0.0894218
ENSG00000089737	DDX24	-0.364878	2.04118e-08	2.93724e-07	0.0664975
ENSG00000182183	SHISAL2A	0.866695	2.05925e-08	2.96092e-07	0.165654
ENSG00000132000	PODNL1	1.13654	2.06995e-08	2.97397e-07	0.219668
ENSG00000065000	AP3D1	0.598376	2.08052e-08	2.98681e-07	0.112589
ENSG00000108510	MED13	-0.398679	2.16207e-08	3.10146e-07	0.0729632
ENSG00000146540	C7orf50	0.827863	2.1698e-08	3.1101e-07	0.15814
ENSG00000142444	TIMM29	0.62153	2.18578e-08	3.13055e-07	0.117464
ENSG00000126705	AHDC1	0.886212	2.25921e-08	3.2332e-07	0.172655
ENSG00000213516	RBMXL1	-0.429713	2.26497e-08	3.23891e-07	0.0792024
ENSG00000141627	DYM	-0.257303	2.27123e-08	3.24532e-07	0.0465651
ENSG00000196704	AMZ2	-0.325886	2.27471e-08	3.24777e-07	0.0592357
ENSG00000204394	VARS1	0.679153	2.282e-08	3.25563e-07	0.128754
ENSG00000188032	C19orf67	2.6023	2.31148e-08	3.29511e-07	0.507765
ENSG00000186765	FSCN2	1.73337	2.32851e-08	3.31682e-07	0.343897
ENSG00000124535	WRNIP1	0.471785	2.33152e-08	3.31852e-07	0.0876431
ENSG00000153207	AHCTF1	-0.394253	2.3689e-08	3.36911e-07	0.0724524
ENSG00000089693	MLF2	0.298148	2.37296e-08	3.36964e-07	0.0540092
ENSG00000167645	YIF1B	0.673112	2.37234e-08	3.36964e-07	0.127606
ENSG00000101255	TRIB3	0.687216	2.37521e-08	3.37023e-07	0.130313
ENSG00000125503	PPP1R12C	0.760561	2.38751e-08	3.38504e-07	0.146088
ENSG00000141012	GALNS	0.541861	2.40304e-08	3.40443e-07	0.0995249
ENSG00000125898	FAM110A	1.07739	2.44036e-08	3.45463e-07	0.210301
ENSG00000128218	VPREB3	1.66413	2.44695e-08	3.46128e-07	0.327927
ENSG00000129757	CDKN1C	1.42268	2.45044e-08	3.46354e-07	0.279559
ENSG00000175938	ORAI3	0.956392	2.5075e-08	3.53963e-07	0.185815
ENSG00000176390	CRLF3	-0.354318	2.50814e-08	3.53963e-07	0.0649745
ENSG00000095787	WAC	-0.266222	2.52491e-08	3.56055e-07	0.0483602
ENSG00000135052	GOLM1	-0.67972	2.56839e-08	3.61908e-07	0.129225
ENSG00000239282	CASTOR1	0.991925	2.57697e-08	3.62838e-07	0.192935
ENSG00000183431	SF3A3	-0.336148	2.6243e-08	3.69218e-07	0.0616492
ENSG00000235173	HGH1	0.780333	2.66554e-08	3.74732e-07	0.14951
ENSG00000120526	NUDCD1	-0.523783	2.68884e-08	3.77427e-07	0.0982028
ENSG00000269335	IKBKG	0.450389	2.68718e-08	3.77427e-07	0.0837738
ENSG00000130513	GDF15	2.1694	2.70017e-08	3.78727e-07	0.437817
ENSG00000284730	TMDD1	4.15939	2.72212e-08	3.81513e-07	0.85991
ENSG00000066777	ARFGEF1	-0.299361	2.72775e-08	3.81968e-07	0.0547738
ENSG00000069696	DRD4	1.49404	2.72992e-08	3.81968e-07	0.295489
ENSG00000105327	BBC3	1.09632	2.73162e-08	3.81968e-07	0.215949
ENSG00000136758	YME1L1	-0.329348	2.74885e-08	3.84084e-07	0.0601668
ENSG00000138385	SSB	-0.478824	2.75397e-08	3.84505e-07	0.0893815
ENSG00000008382	MPND	0.522836	2.75753e-08	3.84675e-07	0.0980574
ENSG00000126858	RHOT1	-0.593394	2.75939e-08	3.84675e-07	0.112044
ENSG00000197056	ZMYM1	-0.558879	2.76897e-08	3.85717e-07	0.105274
ENSG00000073111	MCM2	0.647789	2.80868e-08	3.90951e-07	0.123144
ENSG00000116030	SUMO1	-0.45686	2.85444e-08	3.97019e-07	0.0855173
ENSG00000112651	MRPL2	0.780659	2.86754e-08	3.98538e-07	0.149958
ENSG00000070404	FSTL3	0.899475	2.88241e-08	4.003e-07	0.174882
ENSG00000127720	METTL25	-0.427983	2.89467e-08	4.01698e-07	0.0795312
ENSG00000143554	SLC27A3	0.512045	2.9135e-08	4.03926e-07	0.0961218
ENSG00000166181	API5	-0.295267	2.91514e-08	4.03926e-07	0.0540497
ENSG00000111647	BLTP3B	-0.454918	2.93389e-08	4.06218e-07	0.084909
ENSG00000167604	NFKBID	0.702873	2.93676e-08	4.06307e-07	0.134432
ENSG00000122971	ACADS	0.637649	3.03179e-08	4.19139e-07	0.121718
ENSG00000142186	SCYL1	0.393782	3.03897e-08	4.19813e-07	0.0731108
ENSG00000115825	PRKD3	-0.483749	3.04773e-08	4.20707e-07	0.0906535
ENSG00000132510	KDM6B	0.755339	3.05599e-08	4.21528e-07	0.145439
ENSG00000087087	SRRT	0.301495	3.07298e-08	4.23553e-07	0.0572125
ENSG00000108091	CCDC6	-0.448092	3.07866e-08	4.23724e-07	0.0838401
ENSG00000140694	PARN	-0.263939	3.07885e-08	4.23724e-07	0.0482618
ENSG00000078902	TOLLIP	0.72902	3.10537e-08	4.27053e-07	0.139611
ENSG00000185862	EVI2B	-0.784401	3.10852e-08	4.27165e-07	0.151588
ENSG00000141570	CBX8	0.625474	3.11252e-08	4.27394e-07	0.119126
ENSG00000147687	TATDN1	-0.418448	3.11985e-08	4.28079e-07	0.0778703
ENSG00000085644	ZNF213	0.766593	3.16341e-08	4.33622e-07	0.148574
ENSG00000130222	GADD45G	1.58322	3.16498e-08	4.33622e-07	0.327698
ENSG00000131037	EPS8L1	1.14316	3.18017e-08	4.35051e-07	0.225009
ENSG00000179387	ELMOD2	-0.396726	3.17904e-08	4.35051e-07	0.0750549
ENSG00000099968	BCL2L13	-0.27592	3.19257e-08	4.36421e-07	0.0506675
ENSG00000259224	SLC35G6	1.33481	3.31047e-08	4.52201e-07	0.264348
ENSG00000051128	HOMER3	1.34776	3.34501e-08	4.56578e-07	0.269811
ENSG00000105376	ICAM5	1.30391	3.36466e-08	4.58917e-07	0.258177
ENSG00000105576	TNPO2	0.244167	3.39079e-08	4.62138e-07	0.0446715
ENSG00000260729		1.15347	3.40587e-08	4.63848e-07	0.230095
ENSG00000149091	DGKZ	0.677988	3.42644e-08	4.66302e-07	0.130698
ENSG00000167522	ANKRD11	0.419804	3.47094e-08	4.72006e-07	0.0778522
ENSG00000104973	MED25	0.695816	3.51139e-08	4.76799e-07	0.133639
ENSG00000135686	KLHL36	0.343412	3.51098e-08	4.76799e-07	0.0651492
ENSG00000128886	ELL3	1.95064	3.52583e-08	4.78405e-07	0.392268
ENSG00000108819	PPP1R9B	0.940826	3.53527e-08	4.7933e-07	0.185403
ENSG00000160716	CHRNB2	1.8574	3.54258e-08	4.79611e-07	0.376703
ENSG00000162604	TM2D1	-0.262476	3.54114e-08	4.79611e-07	0.0485409
ENSG00000197599	CCDC154	0.925869	3.56414e-08	4.82173e-07	0.182554
ENSG00000203782	LORICRIN	1.83432	3.5913e-08	4.85489e-07	0.374902
ENSG00000204463	BAG6	0.3036	3.63925e-08	4.91607e-07	0.0574157
ENSG00000099326	MZF1	0.535034	3.64237e-08	4.91666e-07	0.101547
ENSG00000146007	ZMAT2	-0.336486	3.68327e-08	4.96456e-07	0.0624184
ENSG00000188396	DYNLT4	1.18578	3.6806e-08	4.96456e-07	0.235736
ENSG00000072415	PALS1	-0.463705	3.68912e-08	4.96878e-07	0.0872575
ENSG00000114030	KPNA1	-0.398836	3.80317e-08	5.11862e-07	0.0725689
ENSG00000130005	GAMT	0.900193	3.85404e-08	5.18327e-07	0.176799
ENSG00000115993	TRAK2	-0.399723	3.9386e-08	5.29311e-07	0.0741936
ENSG00000133739	LRRCC1	-0.568088	3.98119e-08	5.34641e-07	0.108506
ENSG00000152082	MZT2B	0.939262	4.046e-08	5.42947e-07	0.185974
ENSG00000149761	NUDT22	0.69881	4.11623e-08	5.51967e-07	0.135438
ENSG00000141568	FOXK2	0.321503	4.13121e-08	5.5357e-07	0.0608387
ENSG00000130204	TOMM40	0.669976	4.19473e-08	5.61259e-07	0.130062
ENSG00000140262	TCF12	-0.408701	4.19234e-08	5.61259e-07	0.0767555
ENSG00000062725	APPBP2	-0.2862	4.22745e-08	5.65224e-07	0.0529104
ENSG00000124459	ZNF45	-0.436214	4.23909e-08	5.66367e-07	0.0820388
ENSG00000100241	SBF1	0.720333	4.27064e-08	5.70166e-07	0.141721
ENSG00000143164	DCAF6	-0.39233	4.33391e-08	5.78192e-07	0.0734264
ENSG00000184261	KCNK12	1.01917	4.45238e-08	5.93564e-07	0.202476
ENSG00000079432	CIC	0.757765	4.45641e-08	5.93669e-07	0.148283
ENSG00000074370	ATP2A3	0.694733	4.47441e-08	5.95251e-07	0.135498
ENSG00000152061	RABGAP1L	-0.553042	4.47479e-08	5.95251e-07	0.105867
ENSG00000149476	TKFC	0.588189	4.5308e-08	6.02264e-07	0.113013
ENSG00000156026	MCU	-0.282486	4.54165e-08	6.03268e-07	0.0523804
ENSG00000126005	MMP24OS	0.698122	4.55326e-08	6.04371e-07	0.135735
ENSG00000100599	RIN3	0.724737	4.60397e-08	6.1066e-07	0.140758
ENSG00000138698	RAP1GDS1	-0.35932	4.65587e-08	6.17096e-07	0.0673025
ENSG00000104980	TIMM44	0.453621	4.66993e-08	6.18512e-07	0.0862069
ENSG00000171611	PTCRA	1.34509	4.67369e-08	6.18563e-07	0.269858
ENSG00000181790	ADGRB1	1.94227	4.71596e-08	6.23706e-07	0.394354
ENSG00000141965	FEM1A	0.874233	4.75477e-08	6.28385e-07	0.173529
ENSG00000198931	APRT	0.608329	4.80767e-08	6.34918e-07	0.117748
ENSG00000159322	ADPGK	-0.303593	4.8522e-08	6.39875e-07	0.0580279
ENSG00000168724	DNAJC21	-0.20961	4.84955e-08	6.39875e-07	0.0387702
ENSG00000247596	TWF2	0.786646	4.88524e-08	6.43768e-07	0.155685
ENSG00000198870	STKLD1	0.93698	4.90118e-08	6.45405e-07	0.185375
ENSG00000128951	DUT	0.429204	4.93404e-08	6.49265e-07	0.0812066
ENSG00000184640	SEPTIN9	0.418346	4.99885e-08	6.5732e-07	0.0793002
ENSG00000101200	AVP	2.03462	5.00776e-08	6.58019e-07	0.414466
ENSG00000169733	RFNG	0.568228	5.01694e-08	6.58753e-07	0.109889
ENSG00000113391	FAM172A	-0.368101	5.02552e-08	6.59405e-07	0.0693289
ENSG00000035928	RFC1	-0.428348	5.03012e-08	6.59537e-07	0.0814467
ENSG00000167716	WDR81	0.823378	5.04649e-08	6.6121e-07	0.16285
ENSG00000071073	MGAT4A	-0.476927	5.10507e-08	6.68407e-07	0.090863
ENSG00000204227	RING1	0.362423	5.14684e-08	6.73394e-07	0.0682325
ENSG00000064687	ABCA7	0.770929	5.17681e-08	6.76831e-07	0.151329
ENSG00000206140	TMEM191C	1.07355	5.2446e-08	6.85204e-07	0.216336
ENSG00000095066	HOOK2	0.668057	5.31252e-08	6.93583e-07	0.130176
ENSG00000197162	ZNF785	0.444255	5.39592e-08	7.03969e-07	0.0845515
ENSG00000109501	WFS1	0.841109	5.48469e-08	7.15041e-07	0.166392
ENSG00000132382	MYBBP1A	0.602584	5.56505e-08	7.25002e-07	0.116706
ENSG00000129680	MAP7D3	-0.404832	5.58256e-08	7.26765e-07	0.0770362
ENSG00000186376	ZNF75D	-0.358355	5.62114e-08	7.31268e-07	0.0675861
ENSG00000168056	LTBP3	0.923313	5.65849e-08	7.35604e-07	0.184628
ENSG00000072071	ADGRL1	0.663117	5.70382e-08	7.40971e-07	0.129708
ENSG00000163754	GYG1	-0.437321	5.72625e-08	7.43357e-07	0.083946
ENSG00000167701	GPT	1.12438	5.7564e-08	7.46741e-07	0.227611
ENSG00000203896	LIME1	0.852506	5.87359e-08	7.61404e-07	0.169918
ENSG00000082898	XPO1	-0.34482	5.88151e-08	7.61891e-07	0.0638204
ENSG00000004975	DVL2	0.419922	5.93946e-08	7.68853e-07	0.0793623
ENSG00000186603	HPDL	1.22299	5.95494e-08	7.70312e-07	0.24811
ENSG00000127980	PEX1	-0.447734	6.05932e-08	7.83261e-07	0.0856828
ENSG00000120913	PDLIM2	0.577655	6.09449e-08	7.87252e-07	0.111816
ENSG00000166189	HPS6	0.764283	6.12458e-08	7.9058e-07	0.151991
ENSG00000103269	RHBDL1	1.42508	6.29734e-08	8.11737e-07	0.292633
ENSG00000176531	PHLDB3	0.820469	6.29705e-08	8.11737e-07	0.163623
ENSG00000198393	ZNF26	-0.402736	6.31533e-08	8.13482e-07	0.0766695
ENSG00000087116	ADAMTS2	4.16846	6.33464e-08	8.15395e-07	1.01874
ENSG00000080345	RIF1	-0.433859	6.34873e-08	8.16635e-07	0.0833515
ENSG00000142002	DPP9	0.496395	6.37093e-08	8.18914e-07	0.0951333
ENSG00000103363	ELOB	0.51909	6.4057e-08	8.22806e-07	0.101971
ENSG00000117360	PRPF3	-0.326683	6.44677e-08	8.27501e-07	0.0616275
ENSG00000122008	POLK	-0.36668	6.486e-08	8.31953e-07	0.0695765
ENSG00000182327	GLTPD2	1.98132	6.57701e-08	8.43037e-07	0.416362
ENSG00000167880	EVPL	1.87937	6.61966e-08	8.47909e-07	0.388937
ENSG00000108061	SHOC2	-0.373062	6.67328e-08	8.5418e-07	0.0718619
ENSG00000198792	TMEM184B	0.489787	6.69973e-08	8.56967e-07	0.0946266
ENSG00000182685	BRICD5	0.854175	6.8288e-08	8.72866e-07	0.171439
ENSG00000154832	CXXC1	0.452332	6.97876e-08	8.91411e-07	0.0861394
ENSG00000121892	PDS5A	-0.21935	7.07267e-08	9.02777e-07	0.041044
ENSG00000101439	CST3	1.358	7.15751e-08	9.12969e-07	0.279813
ENSG00000183751	TBL3	0.695052	7.22664e-08	9.21145e-07	0.13764
ENSG00000183048	SLC25A10	1.08455	7.23713e-08	9.2184e-07	0.219777
ENSG00000027847	B4GALT7	0.52066	7.25132e-08	9.23005e-07	0.101254
ENSG00000265820	MIR3177	2.93309	7.25751e-08	9.23151e-07	0.587781
ENSG00000100883	SRP54	-0.330854	7.31732e-08	9.30113e-07	0.0611817
ENSG00000156976	EIF4A2	-0.355541	7.43733e-08	9.44711e-07	0.0683119
ENSG00000105258	POLR2I	1.02888	7.71589e-08	9.79415e-07	0.209778
ENSG00000173264	GPR137	0.760004	7.80848e-08	9.90481e-07	0.151534
ENSG00000156858	PRR14	0.493579	7.89736e-08	1.00106e-06	0.0958104
ENSG00000142327	RNPEPL1	0.599814	7.93276e-08	1.00485e-06	0.118662
ENSG00000100796	PPP4R3A	-0.211832	7.95922e-08	1.00681e-06	0.040805
ENSG00000183153	GJD3	2.46729	7.95912e-08	1.00681e-06	0.507625
ENSG00000132819	RBM38	0.739555	8.05339e-08	1.01802e-06	0.147353
ENSG00000119707	RBM25	-0.301537	8.06727e-08	1.01907e-06	0.0574698
ENSG00000125449	ARMC7	0.447316	8.08049e-08	1.02004e-06	0.0865492
ENSG00000167397	VKORC1	-0.791443	8.1789e-08	1.03175e-06	0.158814
ENSG00000146205	ANO7	1.33621	8.19737e-08	1.03337e-06	0.274011
ENSG00000005175	RPAP3	-0.404345	8.42868e-08	1.06179e-06	0.0777004
ENSG00000161281	COX7A1	1.9175	8.48377e-08	1.068e-06	0.398922
ENSG00000177427	MIEF2	0.60907	8.50647e-08	1.07012e-06	0.120445
ENSG00000107897	ACBD5	-0.333492	8.53373e-08	1.07281e-06	0.0635934
ENSG00000011132	APBA3	0.643757	8.56677e-08	1.07623e-06	0.127553
ENSG00000198791	CNOT7	-0.34894	8.77168e-08	1.10121e-06	0.0667417
ENSG00000065809	FAM107B	-0.300448	8.92501e-08	1.11969e-06	0.057167
ENSG00000198663	C6orf89	-0.240069	8.97865e-08	1.12565e-06	0.0453205
ENSG00000185189	NRBP2	0.640651	9.15235e-08	1.14664e-06	0.127096
ENSG00000090238	YPEL3	0.639065	9.16394e-08	1.14731e-06	0.127615
ENSG00000054611	TBC1D22A	0.502699	9.26077e-08	1.15864e-06	0.0985975
ENSG00000132478	UNK	0.38033	9.35264e-08	1.16934e-06	0.0730039
ENSG00000167965	MLST8	0.55904	9.4217e-08	1.17717e-06	0.109605
ENSG00000114742	WDR48	-0.361849	9.45151e-08	1.18009e-06	0.0692532
ENSG00000175054	ATR	-0.461451	9.49692e-08	1.18495e-06	0.0897469
ENSG00000122515	ZMIZ2	0.65232	9.50483e-08	1.18513e-06	0.129522
ENSG00000172508	CARNS1	0.76724	9.64355e-08	1.2016e-06	0.154397
ENSG00000006638	TBXA2R	1.92794	9.66913e-08	1.20315e-06	0.407058
ENSG00000106244	PDAP1	0.315972	9.66275e-08	1.20315e-06	0.0603941
ENSG00000141526	SLC16A3	1.12211	9.74326e-08	1.21155e-06	0.23306
ENSG00000036549	ZZZ3	-0.381849	9.75391e-08	1.21205e-06	0.0733736
ENSG00000141971	MVB12A	0.688301	9.80439e-08	1.2175e-06	0.137787
ENSG00000185800	DMWD	0.751258	9.87177e-08	1.22504e-06	0.150506
ENSG00000147251	DOCK11	-0.380392	1.01119e-07	1.25399e-06	0.0731441
ENSG00000118873	RAB3GAP2	-0.215304	1.01518e-07	1.25691e-06	0.0412042
ENSG00000180530	NRIP1	-0.449767	1.01473e-07	1.25691e-06	0.0873253
ENSG00000183734	ASCL2	1.52522	1.01561e-07	1.25691e-06	0.319557
ENSG00000102753	KPNA3	-0.370714	1.01816e-07	1.25922e-06	0.0714448
ENSG00000164219	PGGT1B	-0.410836	1.02026e-07	1.26096e-06	0.0796158
ENSG00000153487	ING1	0.520582	1.02683e-07	1.26823e-06	0.102403
ENSG00000106305	AIMP2	0.636285	1.0334e-07	1.27548e-06	0.126254
ENSG00000172046	USP19	0.312775	1.05445e-07	1.30058e-06	0.0607804
ENSG00000187531	SIRT7	0.457918	1.0558e-07	1.30138e-06	0.0894545
ENSG00000142303	ADAMTS10	0.981541	1.05696e-07	1.30192e-06	0.202741
ENSG00000116151	MORN1	0.645169	1.05839e-07	1.30281e-06	0.129063
ENSG00000285480	H2BK1	0.930166	1.06533e-07	1.31047e-06	0.189731
ENSG00000130787	HIP1R	0.679597	1.06672e-07	1.3113e-06	0.13542
ENSG00000187325	TAF9B	-0.410781	1.08632e-07	1.3345e-06	0.0797879
ENSG00000215041	NEURL4	0.519719	1.09416e-07	1.34322e-06	0.102317
ENSG00000106211	HSPB1	1.2708	1.10448e-07	1.35499e-06	0.265098
ENSG00000139438	FAM222A	1.09588	1.1119e-07	1.36318e-06	0.22577
ENSG00000129007	CALML4	0.977916	1.12877e-07	1.38293e-06	0.201117
ENSG00000186827	TNFRSF4	1.22602	1.13765e-07	1.39288e-06	0.257113
ENSG00000160767	ENTREP3	0.789338	1.13891e-07	1.39349e-06	0.159956
ENSG00000144320	LNPK	-0.486678	1.15271e-07	1.40944e-06	0.0960421
ENSG00000063241	ISOC2	0.955573	1.19471e-07	1.45981e-06	0.198515
ENSG00000196943	NOP9	0.254526	1.2024e-07	1.46823e-06	0.0486834
ENSG00000115464	USP34	-0.368296	1.2055e-07	1.47103e-06	0.0721447
ENSG00000186654	PRR5	0.829766	1.20958e-07	1.47503e-06	0.170411
ENSG00000131966	ACTR10	-0.328503	1.21834e-07	1.48472e-06	0.0621242
ENSG00000064995	TAF11	-0.322129	1.23466e-07	1.50299e-06	0.0611913
ENSG00000148296	SURF6	0.569949	1.23498e-07	1.50299e-06	0.113451
ENSG00000176715	ACSF3	0.272126	1.2436e-07	1.51248e-06	0.0524012
ENSG00000177595	PIDD1	0.891159	1.24811e-07	1.51696e-06	0.183246
ENSG00000188566	NDOR1	0.780162	1.25614e-07	1.52571e-06	0.159801
ENSG00000119328	ABITRAM	-0.487284	1.26718e-07	1.53809e-06	0.0961805
ENSG00000081237	PTPRC	-0.49881	1.26823e-07	1.53835e-06	0.0985772
ENSG00000143493	INTS7	-0.375776	1.27535e-07	1.54596e-06	0.0730733
ENSG00000135336	ORC3	-0.412217	1.2794e-07	1.54984e-06	0.0805413
ENSG00000182670	TTC3	-0.34652	1.28034e-07	1.54996e-06	0.0671891
ENSG00000119787	ATL2	-0.212452	1.28788e-07	1.55805e-06	0.0405323
ENSG00000147144	CCDC120	0.687544	1.28898e-07	1.55835e-06	0.138613
ENSG00000132153	DHX30	0.413756	1.29114e-07	1.55994e-06	0.0815519
ENSG00000104979	C19orf53	0.486858	1.30028e-07	1.56994e-06	0.0960183
ENSG00000150990	DHX37	0.574266	1.30832e-07	1.57861e-06	0.114786
ENSG00000130827	PLXNA3	0.632892	1.31199e-07	1.58199e-06	0.126536
ENSG00000090612	ZNF268	-0.496715	1.31392e-07	1.58327e-06	0.0988037
ENSG00000198301	SDAD1	-0.390816	1.33419e-07	1.60665e-06	0.0764039
ENSG00000164024	METAP1	-0.356875	1.33852e-07	1.6108e-06	0.0693621
ENSG00000101189	MRGBP	0.337853	1.35368e-07	1.62798e-06	0.0656162
ENSG00000168303	MPLKIP	0.36095	1.36617e-07	1.64192e-06	0.0703249
ENSG00000108515	ENO3	0.673636	1.36708e-07	1.64193e-06	0.137158
ENSG00000100258	LMF2	0.756521	1.38408e-07	1.66126e-06	0.154396
ENSG00000033100	CHPF2	0.345192	1.38621e-07	1.66164e-06	0.0671836
ENSG00000159882	ZNF230	-0.406446	1.38572e-07	1.66164e-06	0.0796206
ENSG00000104884	ERCC2	0.508633	1.38865e-07	1.66347e-06	0.100538
ENSG00000185614	INKA1	1.22789	1.39399e-07	1.66877e-06	0.257151
ENSG00000102882	MAPK3	0.40785	1.39796e-07	1.67243e-06	0.0799608
ENSG00000103510	KAT8	0.274941	1.42324e-07	1.70156e-06	0.0530924
ENSG00000136492	BRIP1	-0.693614	1.45255e-07	1.73548e-06	0.14105
ENSG00000106028	SSBP1	-0.42681	1.45926e-07	1.74235e-06	0.0849481
ENSG00000104442	ARMC1	-0.320147	1.46566e-07	1.74885e-06	0.0621488
ENSG00000011478	QPCTL	0.515547	1.46841e-07	1.751e-06	0.102747
ENSG00000012171	SEMA3B	1.31294	1.49289e-07	1.77902e-06	0.276264
ENSG00000113328	CCNG1	-0.477569	1.49732e-07	1.78315e-06	0.095147
ENSG00000205155	PSENEN	-0.68703	1.51547e-07	1.80241e-06	0.139459
ENSG00000264024	MIR4507	1.96911	1.51499e-07	1.80241e-06	0.416056
ENSG00000169660	HEXD	0.731806	1.5341e-07	1.82339e-06	0.148287
ENSG00000103671	TRIP4	-0.372691	1.53624e-07	1.82475e-06	0.0729679
ENSG00000215375	MYL5	0.620804	1.5486e-07	1.83824e-06	0.125187
ENSG00000090581	GNPTG	0.667753	1.55337e-07	1.8427e-06	0.135258
ENSG00000103168	TAF1C	0.481317	1.59221e-07	1.88755e-06	0.0952435
ENSG00000135452	TSPAN31	-0.323246	1.60887e-07	1.90607e-06	0.0631858
ENSG00000160753	RUSC1	0.412417	1.6149e-07	1.91198e-06	0.0813463
ENSG00000198000	NOL8	-0.369718	1.63197e-07	1.93094e-06	0.0725457
ENSG00000198918	RPL39	-0.995079	1.63305e-07	1.93096e-06	0.209984
ENSG00000166925	TSC22D4	0.837858	1.63954e-07	1.93738e-06	0.173497
ENSG00000173275	ZNF449	-0.541074	1.67073e-07	1.97297e-06	0.108464
ENSG00000196455	PIK3R4	-0.4433	1.70332e-07	2.01016e-06	0.0877172
ENSG00000102981	PARD6A	0.688992	1.71312e-07	2.01782e-06	0.14079
ENSG00000110172	CHORDC1	-0.342499	1.71248e-07	2.01782e-06	0.0665733
ENSG00000234616	JRK	0.399818	1.71132e-07	2.01782e-06	0.0788429
ENSG00000135049	AGTPBP1	-0.429214	1.71939e-07	2.02391e-06	0.0854495
ENSG00000159579	RSPRY1	-0.298691	1.72265e-07	2.02644e-06	0.0582032
ENSG00000265491	RNF115	-0.36071	1.75255e-07	2.06029e-06	0.0709795
ENSG00000177706	FAM20C	1.15957	1.78242e-07	2.09405e-06	0.24567
ENSG00000186907	RTN4RL2	2.31394	1.80098e-07	2.1145e-06	0.506201
ENSG00000089818	NECAP1	-0.339395	1.80614e-07	2.11785e-06	0.0665966
ENSG00000244274	DBNDD2	1.2099	1.8056e-07	2.11785e-06	0.259604
ENSG00000127585	FBXL16	1.03953	1.81075e-07	2.12189e-06	0.219949
ENSG00000122545	SEPTIN7	-0.451692	1.82445e-07	2.13658e-06	0.090039
ENSG00000254996	ANKHD1-EIF4EBP3	-0.578923	1.83293e-07	2.14514e-06	0.117378
ENSG00000198858	R3HDM4	0.604805	1.84325e-07	2.15583e-06	0.123113
ENSG00000165392	WRN	-0.374829	1.86267e-07	2.17716e-06	0.0742264
ENSG00000197647	ZNF433	-0.571435	1.86806e-07	2.18206e-06	0.115556
ENSG00000135249	RINT1	-0.465909	1.87026e-07	2.18324e-06	0.0938826
ENSG00000092096	SLC22A17	0.834885	1.91258e-07	2.23122e-06	0.173587
ENSG00000244754	N4BP2L2	-0.457607	1.9147e-07	2.23228e-06	0.0909652
ENSG00000049089	COL9A2	0.613081	1.92322e-07	2.23936e-06	0.125
ENSG00000162735	PEX19	-0.41037	1.922e-07	2.23936e-06	0.0815923
ENSG00000185049	NELFA	0.633981	1.95761e-07	2.27795e-06	0.130046
ENSG00000163466	ARPC2	-0.343633	1.97046e-07	2.29144e-06	0.0691049
ENSG00000037757	MRI1	0.803439	1.97491e-07	2.29516e-06	0.166987
ENSG00000143774	GUK1	0.479834	1.98911e-07	2.3102e-06	0.095637
ENSG00000118412	CASP8AP2	-0.529116	1.99739e-07	2.31834e-06	0.106943
ENSG00000177685	CRACR2B	1.65539	2.01692e-07	2.33953e-06	0.356198
ENSG00000181396	OGFOD3	0.522134	2.03488e-07	2.35886e-06	0.105215
ENSG00000106153	CHCHD2	0.456437	2.07386e-07	2.40253e-06	0.0915186
ENSG00000137770	CTDSPL2	-0.412861	2.08072e-07	2.40896e-06	0.082417
ENSG00000162729	IGSF8	0.642213	2.08346e-07	2.4106e-06	0.132008
ENSG00000110047	EHD1	0.632742	2.08663e-07	2.41275e-06	0.130459
ENSG00000135253	KCP	1.42521	2.12177e-07	2.45182e-06	0.307001
ENSG00000108465	CDK5RAP3	0.46332	2.12562e-07	2.45473e-06	0.0927218
ENSG00000136279	DBNL	0.393584	2.12831e-07	2.45628e-06	0.0782327
ENSG00000169641	LUZP1	-0.500697	2.15401e-07	2.48438e-06	0.101028
ENSG00000157778	PSMG3	0.38059	2.15996e-07	2.48966e-06	0.0757724
ENSG00000089639	GMIP	0.7159	2.16634e-07	2.49545e-06	0.148864
ENSG00000100359	SGSM3	0.630978	2.19893e-07	2.5314e-06	0.129526
ENSG00000072310	SREBF1	1.15265	2.24472e-07	2.58248e-06	0.246882
ENSG00000247315	ZCCHC3	0.522152	2.26128e-07	2.59991e-06	0.105762
ENSG00000006459	KDM7A	-0.491411	2.2708e-07	2.60921e-06	0.0994874
ENSG00000123684	LPGAT1	-0.469193	2.28237e-07	2.62085e-06	0.0944768
ENSG00000120903	CHRNA2	2.02653	2.29233e-07	2.63064e-06	0.43892
ENSG00000090661	CERS4	0.664513	2.30486e-07	2.64337e-06	0.137611
ENSG00000099958	DERL3	1.46237	2.32448e-07	2.6642e-06	0.321036
ENSG00000126603	GLIS2	0.7506	2.35444e-07	2.69685e-06	0.156945
ENSG00000160877	NACC1	0.908693	2.36197e-07	2.70379e-06	0.193452
ENSG00000160408	ST6GALNAC6	0.975603	2.36742e-07	2.70833e-06	0.207399
ENSG00000147065	MSN	-0.210723	2.37858e-07	2.7194e-06	0.0408157
ENSG00000138031	ADCY3	0.678381	2.43234e-07	2.77912e-06	0.141373
ENSG00000182903	ZNF721	-0.506412	2.44083e-07	2.78708e-06	0.103048
ENSG00000108094	CUL2	-0.317329	2.4431e-07	2.78794e-06	0.0627328
ENSG00000072364	AFF4	-0.334183	2.4678e-07	2.81437e-06	0.0662812
ENSG00000188191	PRKAR1B	0.811511	2.51664e-07	2.86828e-06	0.171108
ENSG00000165915	SLC39A13	0.570516	2.53807e-07	2.89091e-06	0.117345
ENSG00000165661	QSOX2	0.494666	2.54019e-07	2.89152e-06	0.100425
ENSG00000173531	MST1	0.606144	2.55273e-07	2.90399e-06	0.12457
ENSG00000069248	NUP133	-0.226338	2.56692e-07	2.91831e-06	0.0459572
ENSG00000174915	PTDSS2	0.626124	2.5764e-07	2.92728e-06	0.129545
ENSG00000078304	PPP2R5C	-0.511229	2.57947e-07	2.92894e-06	0.103512
ENSG00000105063	PPP6R1	0.510189	2.58372e-07	2.93195e-06	0.105111
ENSG00000196290	NIF3L1	-0.339665	2.59228e-07	2.93985e-06	0.0675277
ENSG00000198700	IPO9	-0.226239	2.59864e-07	2.94523e-06	0.0442277
ENSG00000105197	TIMM50	0.399129	2.611e-07	2.95741e-06	0.0800956
ENSG00000177119	ANO6	-0.434499	2.6304e-07	2.97754e-06	0.0883768
ENSG00000170779	CDCA4	0.614314	2.64519e-07	2.99244e-06	0.127664
ENSG00000213672	NCKIPSD	0.523123	2.68676e-07	3.03758e-06	0.106851
ENSG00000132613	MTSS2	1.37702	2.68844e-07	3.03761e-06	0.299062
ENSG00000175040	CHST2	1.31442	2.71008e-07	3.06017e-06	0.287565
ENSG00000104915	STX10	0.484553	2.71934e-07	3.06873e-06	0.0991563
ENSG00000115816	CEBPZ	-0.380738	2.72583e-07	3.07416e-06	0.0767007
ENSG00000162600	OMA1	-0.392613	2.73951e-07	3.08578e-06	0.0787456
ENSG00000196588	MRTFA	0.433297	2.73837e-07	3.08578e-06	0.087711
ENSG00000142765	SYTL1	0.774356	2.7944e-07	3.14568e-06	0.16323
ENSG00000082068	WDR70	-0.32646	2.8125e-07	3.1641e-06	0.0649663
ENSG00000129515	SNX6	-0.394257	2.82243e-07	3.17332e-06	0.0794147
ENSG00000117020	AKT3	-0.479543	2.85229e-07	3.20296e-06	0.0990959
ENSG00000213339	QTRT1	0.64397	2.85223e-07	3.20296e-06	0.133404
ENSG00000099817	POLR2E	0.572451	2.8701e-07	3.22098e-06	0.118225
ENSG00000134905	CARS2	0.327308	2.87966e-07	3.22974e-06	0.0647443
ENSG00000131748	STARD3	0.491821	2.91572e-07	3.26818e-06	0.100744
ENSG00000141905	NFIC	0.647656	2.93152e-07	3.28387e-06	0.134683
ENSG00000070413	DGCR2	0.496739	2.95782e-07	3.31131e-06	0.101163
ENSG00000070950	RAD18	-0.425418	2.96303e-07	3.31329e-06	0.0859823
ENSG00000130706	ADRM1	0.571138	2.9632e-07	3.31329e-06	0.117967
ENSG00000129559	NEDD8	-0.359424	2.96986e-07	3.3187e-06	0.0721933
ENSG00000077348	EXOSC5	0.629721	2.97882e-07	3.32668e-06	0.130963
ENSG00000104824	HNRNPL	0.256496	3.00455e-07	3.35337e-06	0.0501744
ENSG00000116668	SWT1	-0.487919	3.02948e-07	3.37914e-06	0.0997121
ENSG00000174917	MICOS13	0.508747	3.037e-07	3.38546e-06	0.104467
ENSG00000160219	GAB3	-0.561191	3.07347e-07	3.42402e-06	0.115701
ENSG00000070985	TRPM5	1.15721	3.09153e-07	3.43996e-06	0.251079
ENSG00000167395	ZNF646	0.500447	3.09046e-07	3.43996e-06	0.102516
ENSG00000134852	CLOCK	-0.491735	3.0983e-07	3.4454e-06	0.100729
ENSG00000167476	JSRP1	1.29938	3.10565e-07	3.45147e-06	0.283875
ENSG00000131725	WDR44	-0.351062	3.10809e-07	3.45209e-06	0.0701866
ENSG00000008086	CDKL5	-0.423078	3.11394e-07	3.4544e-06	0.0856609
ENSG00000163412	EIF4E3	-0.68325	3.11366e-07	3.4544e-06	0.143253
ENSG00000166965	RCCD1	0.693936	3.13965e-07	3.48081e-06	0.145983
ENSG00000141522	ARHGDIA	0.559182	3.14307e-07	3.48249e-06	0.115679
ENSG00000211456	SACM1L	-0.404255	3.14566e-07	3.48326e-06	0.0811654
ENSG00000105617	LENG1	0.462673	3.18999e-07	3.5302e-06	0.0942823
ENSG00000169221	TBC1D10B	0.645351	3.25608e-07	3.60117e-06	0.135661
ENSG00000102897	LYRM1	-0.368584	3.26369e-07	3.6074e-06	0.0741767
ENSG00000016864	GLT8D1	-0.263965	3.267e-07	3.60888e-06	0.052425
ENSG00000136874	STX17	-0.496126	3.27175e-07	3.61194e-06	0.102056
ENSG00000135045	C9orf40	0.491006	3.28301e-07	3.62219e-06	0.100582
ENSG00000056097	ZFR	-0.296933	3.29044e-07	3.62821e-06	0.0589247
ENSG00000161011	SQSTM1	0.812128	3.29268e-07	3.62848e-06	0.175163
ENSG00000124795	DEK	-0.348168	3.31263e-07	3.64828e-06	0.0713793
ENSG00000167508	MVD	0.619591	3.31885e-07	3.65293e-06	0.129626
ENSG00000184922	FMNL1	0.37501	3.32388e-07	3.65626e-06	0.0767012
ENSG00000074603	DPP8	-0.295325	3.43384e-07	3.77496e-06	0.0589971
ENSG00000112200	ZNF451	-0.40093	3.46963e-07	3.81201e-06	0.0811872
ENSG00000078177	N4BP2	-0.348832	3.49035e-07	3.83247e-06	0.0693476
ENSG00000183735	TBK1	-0.455947	3.55059e-07	3.89628e-06	0.0940489
ENSG00000160633	SAFB	0.433038	3.60213e-07	3.95047e-06	0.0888591
ENSG00000129084	PSMA1	-0.379911	3.6153e-07	3.96254e-06	0.0767862
ENSG00000213079	SCAF8	-0.26659	3.65709e-07	4.00595e-06	0.053199
ENSG00000182544	MFSD5	0.445647	3.66942e-07	4.01705e-06	0.0911392
ENSG00000196453	ZNF777	0.635584	3.69556e-07	4.04325e-06	0.134187
ENSG00000130475	FCHO1	0.532815	3.70068e-07	4.04643e-06	0.109994
ENSG00000176845	METRNL	1.06474	3.72734e-07	4.07315e-06	0.232733
ENSG00000125731	SH2D3A	0.715707	3.74007e-07	4.08462e-06	0.151172
ENSG00000033030	ZCCHC8	-0.312648	3.80964e-07	4.15812e-06	0.0628332
ENSG00000172725	CORO1B	0.746667	3.85967e-07	4.21021e-06	0.159286
ENSG00000134759	ELP2	-0.342674	3.86844e-07	4.21606e-06	0.0692473
ENSG00000174132	FAM174A	0.618627	3.86964e-07	4.21606e-06	0.129652
ENSG00000185338	SOCS1	1.54661	3.87692e-07	4.22148e-06	0.342212
ENSG00000115596	WNT6	1.71304	3.88485e-07	4.2276e-06	0.376286
ENSG00000068878	PSME4	-0.435386	3.97834e-07	4.32677e-06	0.0891848
ENSG00000133872	SARAF	-0.311869	3.98731e-07	4.33395e-06	0.0628506
ENSG00000160325	CACFD1	0.787377	4.0295e-07	4.37721e-06	0.168723
ENSG00000178188	SH2B1	0.461176	4.03817e-07	4.38403e-06	0.0953314
ENSG00000007047	MARK4	0.616074	4.05074e-07	4.39507e-06	0.129715
ENSG00000233436	BTBD18	1.03456	4.10997e-07	4.45669e-06	0.225319
ENSG00000174442	ZWILCH	-0.410235	4.13886e-07	4.48536e-06	0.0839663
ENSG00000106443	PHF14	-0.28613	4.14476e-07	4.48644e-06	0.0575106
ENSG00000160214	RRP1	0.624399	4.14262e-07	4.48644e-06	0.131749
ENSG00000174842	GLMN	-0.46776	4.16437e-07	4.505e-06	0.0965115
ENSG00000138190	EXOC6	-0.450812	4.17168e-07	4.51025e-06	0.0928317
ENSG00000165782	PIP4P1	0.32576	4.18288e-07	4.51969e-06	0.065976
ENSG00000131398	KCNC3	0.712616	4.18644e-07	4.52086e-06	0.152
ENSG00000205060	SLC35B4	-0.385737	4.19948e-07	4.53227e-06	0.0787421
ENSG00000010295	IFFO1	0.479686	4.21965e-07	4.55135e-06	0.0992446
ENSG00000167110	GOLGA2	0.255384	4.22687e-07	4.55645e-06	0.0507965
ENSG00000103148	NPRL3	0.540657	4.2726e-07	4.60304e-06	0.112752
ENSG00000161395	PGAP3	0.446098	4.29941e-07	4.6292e-06	0.0915723
ENSG00000117593	DARS2	-0.276694	4.30491e-07	4.63239e-06	0.0556237
ENSG00000161217	PCYT1A	-0.275895	4.44561e-07	4.77818e-06	0.0554994
ENSG00000275238	MIR4734	3.42434	4.44309e-07	4.77818e-06	0.743272
ENSG00000177981	ASB8	-0.249347	4.46828e-07	4.79973e-06	0.0500802
ENSG00000140382	HMG20A	-0.299688	4.47116e-07	4.8e-06	0.0604945
ENSG00000198720	ANKRD13B	1.06961	4.48009e-07	4.80677e-06	0.234129
ENSG00000105245	NUMBL	0.714234	4.48312e-07	4.8072e-06	0.152771
ENSG00000091947	TMEM101	0.453247	4.52028e-07	4.84138e-06	0.0938856
ENSG00000130304	SLC27A1	0.94818	4.52017e-07	4.84138e-06	0.207793
ENSG00000105610	KLF1	1.2879	4.5302e-07	4.84917e-06	0.288489
ENSG00000096063	SRPK1	-0.402332	4.54223e-07	4.85637e-06	0.0829964
ENSG00000179115	FARSA	0.558734	4.54153e-07	4.85637e-06	0.117348
ENSG00000123636	BAZ2B	-0.387504	4.55171e-07	4.86366e-06	0.0788492
ENSG00000072609	CHFR	0.433642	4.67973e-07	4.99754e-06	0.0889031
ENSG00000198040	ZNF84	-0.49261	4.75356e-07	5.07342e-06	0.102569
ENSG00000187609	EXD3	0.93867	4.80025e-07	5.12027e-06	0.206956
ENSG00000118898	PPL	1.20197	4.84547e-07	5.16549e-06	0.266369
ENSG00000069399	BCL3	1.20061	4.86532e-07	5.18363e-06	0.267715
ENSG00000050130	JKAMP	-0.406403	4.89461e-07	5.21181e-06	0.0834078
ENSG00000110171	TRIM3	0.274635	4.96471e-07	5.28337e-06	0.0555084
ENSG00000100242	SUN2	0.504272	5.00918e-07	5.3276e-06	0.104976
ENSG00000169567	HINT1	-0.434965	5.02531e-07	5.34166e-06	0.0907102
ENSG00000184445	KNTC1	-0.436654	5.04893e-07	5.36365e-06	0.0902664
ENSG00000153015	CWC27	-0.325408	5.09203e-07	5.4063e-06	0.0662614
ENSG00000108312	UBTF	0.404222	5.15689e-07	5.46882e-06	0.0827649
ENSG00000181704	YIPF6	-0.258564	5.15557e-07	5.46882e-06	0.0522696
ENSG00000101997	CCDC22	0.394332	5.1656e-07	5.47488e-06	0.0812726
ENSG00000089289	IGBP1	-0.263262	5.17295e-07	5.4795e-06	0.0533237
ENSG00000103111	MON1B	0.222374	5.18531e-07	5.48624e-06	0.0447288
ENSG00000141456	PELP1	0.516404	5.18505e-07	5.48624e-06	0.108297
ENSG00000157350	ST3GAL2	0.655244	5.19507e-07	5.49338e-06	0.139244
ENSG00000214309	MBLAC1	1.0547	5.21401e-07	5.51024e-06	0.233742
ENSG00000159140	SON	-0.242839	5.22033e-07	5.51373e-06	0.0481899
ENSG00000167964	RAB26	1.2778	5.25048e-07	5.54237e-06	0.284651
ENSG00000177283	FZD8	1.41067	5.31555e-07	5.60783e-06	0.315349
ENSG00000187535	IFT140	0.580638	5.32117e-07	5.61052e-06	0.122591
ENSG00000233198	RNF224	1.16829	5.32642e-07	5.61283e-06	0.259485
ENSG00000148297	MED22	0.393752	5.41818e-07	5.70624e-06	0.0813316
ENSG00000115524	SF3B1	-0.39979	5.45381e-07	5.74045e-06	0.0816672
ENSG00000136643	RPS6KC1	-0.410139	5.48759e-07	5.77269e-06	0.0848628
ENSG00000101246	ARFRP1	0.535409	5.50805e-07	5.79089e-06	0.113357
ENSG00000131323	TRAF3	0.451379	5.57915e-07	5.86227e-06	0.0937667
ENSG00000198612	COPS8	-0.360359	5.589e-07	5.86925e-06	0.0736465
ENSG00000167483	NIBAN3	1.19439	5.59935e-07	5.87675e-06	0.26575
ENSG00000119772	DNMT3A	0.465677	5.65209e-07	5.92871e-06	0.0957177
ENSG00000110011	DNAJC4	0.529625	5.74845e-07	6.02633e-06	0.111526
ENSG00000162191	UBXN1	0.381665	5.78512e-07	6.06129e-06	0.0784526
ENSG00000112245	PTP4A1	2.89509	5.82716e-07	6.10185e-06	0.657475
ENSG00000005801	ZNF195	-0.315905	5.90763e-07	6.18158e-06	0.0646307
ENSG00000147274	RBMX	-0.374854	5.91006e-07	6.18158e-06	0.0782416
ENSG00000089094	KDM2B	0.483876	5.92653e-07	6.19527e-06	0.101594
ENSG00000094880	CDC23	-0.287416	5.96915e-07	6.23626e-06	0.0588057
ENSG00000165259	HDX	-0.910898	6.03039e-07	6.29665e-06	0.200379
ENSG00000126804	ZBTB1	-0.346465	6.05194e-07	6.30594e-06	0.0712969
ENSG00000130812	ANGPTL6	1.0282	6.05077e-07	6.30594e-06	0.234684
ENSG00000168264	IRF2BP2	0.710684	6.05307e-07	6.30594e-06	0.154064
ENSG00000196544	BORCS6	0.587015	6.04841e-07	6.30594e-06	0.125655
ENSG00000176909	MAMSTR	0.98278	6.09796e-07	6.3491e-06	0.216915
ENSG00000124383	MPHOSPH10	-0.36315	6.13162e-07	6.38051e-06	0.0748495
ENSG00000185591	SP1	-0.360983	6.13739e-07	6.38288e-06	0.0711053
ENSG00000125531	FNDC11	1.16105	6.15077e-07	6.39317e-06	0.259391
ENSG00000275074	NUDT18	0.630897	6.16614e-07	6.40551e-06	0.135592
ENSG00000171566	PLRG1	-0.330685	6.22355e-07	6.46147e-06	0.0679832
ENSG00000198198	SZT2	0.30537	6.27274e-07	6.50885e-06	0.0620195
ENSG00000153975	ZUP1	-0.462393	6.28161e-07	6.51436e-06	0.0975099
ENSG00000115073	ACTR1B	0.281016	6.29759e-07	6.52724e-06	0.0546275
ENSG00000174197	MGA	-0.330895	6.30117e-07	6.52726e-06	0.0681269
ENSG00000013561	RNF14	-0.332322	6.34654e-07	6.57053e-06	0.0682327
ENSG00000198887	SMC5	-0.307255	6.36408e-07	6.58497e-06	0.0629777
ENSG00000163904	SENP2	-0.329828	6.4243e-07	6.64353e-06	0.0678387
ENSG00000167393	PPP2R3B	0.773708	6.43834e-07	6.65429e-06	0.169614
ENSG00000140395	SKIC8	-0.300782	6.55154e-07	6.76746e-06	0.061788
ENSG00000142065	ZFP14	-0.492033	6.55593e-07	6.76818e-06	0.104801
ENSG00000160323	ADAMTS13	0.930013	6.65959e-07	6.87132e-06	0.205601
ENSG00000166188	ZNF319	0.653622	6.6875e-07	6.89623e-06	0.141529
ENSG00000129351	ILF3	0.272017	6.72155e-07	6.92743e-06	0.0556144
ENSG00000158828	PINK1	0.632793	6.74066e-07	6.94322e-06	0.136435
ENSG00000122507	BBS9	-0.338891	6.76479e-07	6.96415e-06	0.069928
ENSG00000140675	SLC5A2	1.20233	6.80978e-07	7.00653e-06	0.270889
ENSG00000166987	MBD6	0.552042	6.82831e-07	7.02165e-06	0.117531
ENSG00000088256	GNA11	0.906285	6.97667e-07	7.17018e-06	0.200523
ENSG00000165240	ATP7A	-0.391423	6.99727e-07	7.18732e-06	0.0823301
ENSG00000205765	RIMOC1	-0.390142	7.06046e-07	7.24815e-06	0.0811029
ENSG00000141564	RPTOR	0.453207	7.08815e-07	7.2725e-06	0.0940469
ENSG00000158402	CDC25C	2.05744	7.15236e-07	7.33428e-06	0.464509
ENSG00000080824	HSP90AA1	-0.450903	7.16266e-07	7.34072e-06	0.094917
ENSG00000250571	GLI4	0.596598	7.16671e-07	7.34077e-06	0.128304
ENSG00000174516	PELI3	0.736815	7.27948e-07	7.45211e-06	0.160752
ENSG00000136021	SCYL2	-0.373941	7.33644e-07	7.50621e-06	0.0777608
ENSG00000167671	UBXN6	0.635518	7.42618e-07	7.59379e-06	0.137163
ENSG00000132950	ZMYM5	-0.356171	7.47531e-07	7.6355e-06	0.073947
ENSG00000167625	ZNF526	0.457304	7.47281e-07	7.6355e-06	0.0963629
ENSG00000034693	PEX3	-0.369426	7.55989e-07	7.71328e-06	0.0770326
ENSG00000066651	TRMT11	-0.360144	7.55892e-07	7.71328e-06	0.0749132
ENSG00000088205	DDX18	-0.315736	7.59316e-07	7.73859e-06	0.0652979
ENSG00000161016	RPL8	0.600342	7.5905e-07	7.73859e-06	0.129432
ENSG00000174718	RESF1	-0.683813	7.67752e-07	7.82021e-06	0.149883
ENSG00000197021	EOLA2	0.305028	7.71129e-07	7.85025e-06	0.0630664
ENSG00000040487	SLC66A1	0.693091	7.73202e-07	7.86698e-06	0.151357
ENSG00000105204	DYRK1B	0.608747	7.78884e-07	7.92039e-06	0.131595
ENSG00000160991	ORAI2	0.666897	7.8002e-07	7.92753e-06	0.144835
ENSG00000155313	USP25	-0.36465	7.8386e-07	7.95773e-06	0.075823
ENSG00000167925	GHDC	0.573279	7.83765e-07	7.95773e-06	0.123379
ENSG00000178927	CYBC1	0.516639	7.92307e-07	8.03457e-06	0.110425
ENSG00000198604	BAZ1A	-0.549686	7.92062e-07	8.03457e-06	0.117927
ENSG00000134982	APC	-0.419583	7.93488e-07	8.04208e-06	0.0883359
ENSG00000115866	DARS1	-0.379887	7.95157e-07	8.05453e-06	0.0794654
ENSG00000140320	BAHD1	0.392193	8.06195e-07	8.16183e-06	0.0810022
ENSG00000198131	ZNF544	-0.488054	8.08282e-07	8.17844e-06	0.104246
ENSG00000130332	LSM7	0.614046	8.09424e-07	8.18547e-06	0.133185
ENSG00000197921	HES5	3.00048	8.10776e-07	8.19461e-06	0.683564
ENSG00000167615	LENG8	0.545016	8.13774e-07	8.22038e-06	0.118075
ENSG00000181830	SLC35C1	0.407076	8.15999e-07	8.2383e-06	0.0856138
ENSG00000169592	INO80E	0.494917	8.25786e-07	8.32793e-06	0.105579
ENSG00000215717	TMEM167B	-0.31401	8.25751e-07	8.32793e-06	0.0637177
ENSG00000159086	PAXBP1	-0.318864	8.30021e-07	8.36602e-06	0.0661981
ENSG00000134480	CCNH	-0.54579	8.34193e-07	8.40345e-06	0.117244
ENSG00000070047	PHRF1	0.641249	8.44524e-07	8.4984e-06	0.140454
ENSG00000130764	LRRC47	0.414434	8.44547e-07	8.4984e-06	0.0875991
ENSG00000171044	XKR6	0.800009	8.56329e-07	8.61222e-06	0.178436
ENSG00000189266	PNRC2	-0.343114	8.6452e-07	8.68983e-06	0.0704026
ENSG00000158805	ZNF276	0.692641	8.65424e-07	8.69413e-06	0.152635
ENSG00000116698	SMG7	-0.369719	8.66519e-07	8.69612e-06	0.0774048
ENSG00000165609	NUDT5	-0.341294	8.66571e-07	8.69612e-06	0.0703812
ENSG00000196781	TLE1	0.982744	8.7011e-07	8.72685e-06	0.22147
ENSG00000168993	CPLX1	1.53422	8.70952e-07	8.7305e-06	0.351987
ENSG00000108107	RPL28	0.674647	8.77106e-07	8.78738e-06	0.148095
ENSG00000171867	PRNP	-0.382318	8.89077e-07	8.90245e-06	0.0806773
ENSG00000178694	NSUN3	-0.311679	8.92419e-07	8.93102e-06	0.0648483
ENSG00000178966	RMI1	-0.380008	8.96034e-07	8.9623e-06	0.0800151
ENSG00000065717	TLE2	1.03646	9.02636e-07	9.0234e-06	0.234139
ENSG00000198836	OPA1	-0.308334	9.09378e-07	9.08584e-06	0.0642414
ENSG00000076826	CAMSAP3	1.24004	9.18249e-07	9.16947e-06	0.285331
ENSG00000164970	FAM219A	0.417131	9.25939e-07	9.24121e-06	0.087746
ENSG00000164751	PEX2	-0.370622	9.41623e-07	9.39262e-06	0.0781118
ENSG00000158019	BABAM2	-0.416955	9.50962e-07	9.48061e-06	0.0887048
ENSG00000141428	C18orf21	-0.581076	9.54515e-07	9.51086e-06	0.126231
ENSG00000125827	TMX4	-0.434947	9.59041e-07	9.55076e-06	0.092768
ENSG00000136197	C7orf25	2.34517	9.60239e-07	9.55749e-06	0.537379
ENSG00000105778	AVL9	-0.21131	9.66804e-07	9.61276e-06	0.0435327
ENSG00000168286	THAP11	0.404406	9.66843e-07	9.61276e-06	0.0857479
ENSG00000100379	KCTD17	0.575622	9.71009e-07	9.64894e-06	0.125483
ENSG00000102858	MGRN1	0.619851	9.72124e-07	9.64955e-06	0.135959
ENSG00000145945	FAM50B	0.916804	9.71848e-07	9.64955e-06	0.206272
ENSG00000031003	FAM13B	-0.442337	9.72665e-07	9.64968e-06	0.0945537
ENSG00000172530	BANP	0.675001	9.73205e-07	9.6498e-06	0.149016
ENSG00000167680	SEMA6B	1.52907	9.77997e-07	9.69208e-06	0.363114
ENSG00000158406	H4C8	-0.636011	9.83104e-07	9.73741e-06	0.138876
ENSG00000207574	MIR661	1.8853	9.93156e-07	9.83166e-06	0.436554
ENSG00000167842	MIS12	-0.365616	9.94363e-07	9.83828e-06	0.0770835
ENSG00000138138	ATAD1	-0.331103	9.95788e-07	9.84706e-06	0.0693814
ENSG00000167280	ENGASE	0.57979	1.00224e-06	9.90548e-06	0.126621
ENSG00000156795	NTAQ1	-0.517042	1.00747e-06	9.95185e-06	0.111761
ENSG00000185813	PCYT2	0.422556	1.01365e-06	1.00075e-05	0.0899227
ENSG00000038219	BOD1L1	-0.317741	1.01551e-06	1.00204e-05	0.0665065
ENSG00000137760	ALKBH8	-0.431775	1.01847e-06	1.00442e-05	0.091836
ENSG00000188735	TMEM120B	0.514473	1.0203e-06	1.00568e-05	0.110432
ENSG00000111229	ARPC3	-0.467657	1.02649e-06	1.01124e-05	0.100223
ENSG00000122376	SHLD2	-0.436147	1.04997e-06	1.03382e-05	0.0931791
ENSG00000175467	SART1	0.466701	1.05424e-06	1.03746e-05	0.101446
ENSG00000008838	MED24	0.300835	1.05665e-06	1.03928e-05	0.0631226
ENSG00000129925	PGAP6	0.781012	1.0633e-06	1.04469e-05	0.176152
ENSG00000162004	CCDC78	0.812367	1.06325e-06	1.04469e-05	0.182285
ENSG00000186432	KPNA4	-0.43604	1.07136e-06	1.05204e-05	0.0933397
ENSG00000196110	ZNF699	-0.347615	1.07685e-06	1.05688e-05	0.0732526
ENSG00000270505	IGHV1OR15-1	3.21688	1.07934e-06	1.05874e-05	0.751396
ENSG00000113712	CSNK1A1	0.248964	1.0888e-06	1.06746e-05	0.0524509
ENSG00000163565	IFI16	-0.784293	1.09022e-06	1.06828e-05	0.175931
ENSG00000070031	SCT	1.70049	1.0948e-06	1.07219e-05	0.403135
ENSG00000224420	ADM5	1.0177	1.0959e-06	1.07269e-05	0.231863
ENSG00000187634	SAMD11	2.70273	1.10868e-06	1.08451e-05	0.64979
ENSG00000211450	SELENOH	0.554083	1.10916e-06	1.08451e-05	0.121294
ENSG00000168393	DTYMK	0.518668	1.11955e-06	1.09409e-05	0.112454
ENSG00000183495	EP400	0.291845	1.12076e-06	1.09469e-05	0.0610799
ENSG00000253352	TUG1	-0.38741	1.13228e-06	1.10535e-05	0.0830936
ENSG00000166484	MAPK7	0.460342	1.13544e-06	1.10784e-05	0.0987967
ENSG00000278619	MRM1	0.782366	1.14012e-06	1.11181e-05	0.176379
ENSG00000104529	EEF1D	0.407574	1.16734e-06	1.13776e-05	0.0870439
ENSG00000198860	TSEN15	-0.426838	1.1776e-06	1.14715e-05	0.0922101
ENSG00000112851	ERBIN	-0.376708	1.18305e-06	1.15184e-05	0.0792835
ENSG00000124209	RAB22A	-0.29666	1.18516e-06	1.15267e-05	0.0623336
ENSG00000166946	CCNDBP1	-0.215591	1.18508e-06	1.15267e-05	0.0456303
ENSG00000123159	GIPC1	0.746297	1.19755e-06	1.1641e-05	0.165712
ENSG00000135315	CEP162	-0.535835	1.21717e-06	1.18254e-05	0.117939
ENSG00000123136	DDX39A	0.41262	1.22682e-06	1.19129e-05	0.0883051
ENSG00000174886	NDUFA11	0.499302	1.24229e-06	1.20567e-05	0.108141
ENSG00000103653	CSK	0.605477	1.24481e-06	1.20747e-05	0.134189
ENSG00000169740	ZNF32	-0.402504	1.24587e-06	1.20786e-05	0.0866769
ENSG00000105523	FAM83E	1.39963	1.25265e-06	1.21379e-05	0.327091
ENSG00000079387	SENP1	-0.494858	1.25338e-06	1.21385e-05	0.109141
ENSG00000172247	C1QTNF4	2.97548	1.29107e-06	1.2497e-05	0.704933
ENSG00000136824	SMC2	-0.288229	1.29601e-06	1.25382e-05	0.0612571
ENSG00000130751	NPAS1	1.16743	1.30139e-06	1.25835e-05	0.273181
ENSG00000060339	CCAR1	-0.309349	1.31275e-06	1.26867e-05	0.0652097
ENSG00000184470	TXNRD2	0.451397	1.32522e-06	1.28004e-05	0.0982939
ENSG00000164815	ORC5	-0.480579	1.33775e-06	1.29146e-05	0.10462
ENSG00000196123	MATCAP1	0.426888	1.35597e-06	1.30837e-05	0.0921567
ENSG00000090470	PDCD7	0.392835	1.36904e-06	1.32028e-05	0.084252
ENSG00000089486	CDIP1	0.367112	1.37798e-06	1.3275e-05	0.0785659
ENSG00000146094	DOK3	0.833982	1.37727e-06	1.3275e-05	0.190534
ENSG00000105618	PRPF31	0.380966	1.38891e-06	1.33733e-05	0.0817779
ENSG00000111875	ASF1A	-0.528403	1.41343e-06	1.36022e-05	0.116176
ENSG00000102125	TAFAZZIN	0.362437	1.4219e-06	1.36765e-05	0.0774286
ENSG00000198538	ZNF28	-0.462986	1.42968e-06	1.37442e-05	0.100727
ENSG00000188976	NOC2L	0.442717	1.43076e-06	1.37473e-05	0.0955582
ENSG00000125459	MSTO1	0.251664	1.43934e-06	1.38225e-05	0.0529634
ENSG00000137492	THAP12	-0.31294	1.44184e-06	1.38393e-05	0.0665376
ENSG00000171425	ZNF581	0.547942	1.44654e-06	1.38771e-05	0.12079
ENSG00000104408	EIF3E	-0.416722	1.4649e-06	1.40459e-05	0.0900514
ENSG00000102910	LONP2	-0.29719	1.46835e-06	1.40642e-05	0.0630084
ENSG00000175395	ZNF25	-0.494809	1.46766e-06	1.40642e-05	0.108395
ENSG00000243678	NME2	0.83618	1.4712e-06	1.40842e-05	0.191807
ENSG00000094916	CBX5	-0.446546	1.47327e-06	1.40966e-05	0.0970334
ENSG00000172748	ZNF596	-0.50551	1.47598e-06	1.41152e-05	0.110978
ENSG00000138802	SEC24B	-0.388524	1.47809e-06	1.41279e-05	0.083631
ENSG00000140829	DHX38	0.238226	1.48627e-06	1.41987e-05	0.0505287
ENSG00000119760	SUPT7L	-0.282106	1.49022e-06	1.4229e-05	0.0598031
ENSG00000213799	ZNF845	-0.455471	1.49529e-06	1.427e-05	0.0991382
ENSG00000064547	LPAR2	0.632742	1.51e-06	1.44028e-05	0.141217
ENSG00000267959	MIR3188	2.9009	1.5293e-06	1.45793e-05	0.676424
ENSG00000121417	ZNF211	-0.363849	1.53285e-06	1.45904e-05	0.0781413
ENSG00000196923	PDLIM7	1.0445	1.53192e-06	1.45904e-05	0.244998
ENSG00000258674		0.990198	1.53278e-06	1.45904e-05	0.231081
ENSG00000164172	MOCS2	-0.367442	1.55298e-06	1.47743e-05	0.0792185
ENSG00000107140	TESK1	0.590323	1.55863e-06	1.48204e-05	0.131052
ENSG00000179195	ZNF664	-0.420391	1.56691e-06	1.48913e-05	0.0910374
ENSG00000058272	PPP1R12A	-0.35768	1.57956e-06	1.4996e-05	0.076819
ENSG00000100711	ZFYVE21	0.442532	1.57942e-06	1.4996e-05	0.0966383
ENSG00000050748	MAPK9	-0.269745	1.58276e-06	1.50186e-05	0.0571976
ENSG00000266124	MIR5587	1.4304	1.59194e-06	1.50979e-05	0.344909
ENSG00000144034	TPRKB	-0.375736	1.59843e-06	1.51516e-05	0.080996
ENSG00000076242	MLH1	-0.261558	1.61264e-06	1.52705e-05	0.0554904
ENSG00000083099	LYRM2	-0.318418	1.61191e-06	1.52705e-05	0.067993
ENSG00000079462	PAFAH1B3	0.561425	1.62916e-06	1.54189e-05	0.124502
ENSG00000187690	EZHIP	1.48581	1.63023e-06	1.5421e-05	0.353274
ENSG00000177542	SLC25A22	0.757077	1.63132e-06	1.54234e-05	0.172828
ENSG00000071051	NCK2	0.709415	1.63884e-06	1.54864e-05	0.161578
ENSG00000103502	CDIPT	0.310542	1.6512e-06	1.55872e-05	0.0663734
ENSG00000151806	GUF1	-0.333921	1.65038e-06	1.55872e-05	0.0715461
ENSG00000105248	YJU2	0.515112	1.6568e-06	1.5632e-05	0.113633
ENSG00000009413	REV3L	-0.394082	1.67682e-06	1.58078e-05	0.0857691
ENSG00000050405	LIMA1	-0.515558	1.67716e-06	1.58078e-05	0.113934
ENSG00000064102	INTS13	-0.30854	1.69292e-06	1.59481e-05	0.0659504
ENSG00000112234	FBXL4	-0.234514	1.70393e-06	1.60378e-05	0.0495466
ENSG00000169100	SLC25A6	0.644325	1.7042e-06	1.60378e-05	0.145653
ENSG00000067606	PRKCZ	0.507916	1.71252e-06	1.61079e-05	0.112022
ENSG00000141858	SAMD1	0.690013	1.72651e-06	1.62312e-05	0.158777
ENSG00000148300	REXO4	0.375332	1.74547e-06	1.6401e-05	0.0813079
ENSG00000112561	TFEB	0.790624	1.75455e-06	1.64778e-05	0.182181
ENSG00000156928	MALSU1	0.359836	1.7695e-06	1.66098e-05	0.077713
ENSG00000181472	ZBTB2	-0.413808	1.78048e-06	1.67042e-05	0.090123
ENSG00000199906	RNU5B-2P	-1.17601	1.78386e-06	1.67274e-05	0.276699
ENSG00000090989	EXOC1	-0.259323	1.79609e-06	1.68334e-05	0.0551924
ENSG00000197343	ZNF655	-0.46552	1.80284e-06	1.6888e-05	0.102307
ENSG00000203950	RTL8A	0.439029	1.81691e-06	1.70111e-05	0.0960331
ENSG00000099203	TMED1	0.585085	1.828e-06	1.70974e-05	0.131399
ENSG00000160299	PCNT	0.373385	1.82757e-06	1.70974e-05	0.0805942
ENSG00000189114	BLOC1S3	0.547924	1.83474e-06	1.71518e-05	0.12246
ENSG00000182378	PLCXD1	0.712439	1.84599e-06	1.72481e-05	0.16219
ENSG00000136720	HS6ST1	0.66374	1.86854e-06	1.74499e-05	0.1517
ENSG00000126012	KDM5C	0.244338	1.88164e-06	1.75632e-05	0.0520716
ENSG00000104899	AMH	1.39563	1.8858e-06	1.75931e-05	0.336511
ENSG00000172732	MUS81	0.349694	1.88716e-06	1.75968e-05	0.0756285
ENSG00000189180	ZNF33A	-0.588078	1.89522e-06	1.7663e-05	0.132532
ENSG00000142733	MAP3K6	0.656833	1.93632e-06	1.8031e-05	0.149711
ENSG00000197114	ZGPAT	0.677121	1.93667e-06	1.8031e-05	0.154351
ENSG00000100852	ARHGAP5	-0.491422	1.93875e-06	1.80411e-05	0.109002
ENSG00000074582	BCS1L	0.298744	1.94832e-06	1.8121e-05	0.0641707
ENSG00000110958	PTGES3	-0.364884	1.95584e-06	1.81817e-05	0.0809136
ENSG00000197380	DACT3	1.14752	1.98109e-06	1.84071e-05	0.274196
ENSG00000196417	ZNF765	-0.391254	1.98261e-06	1.84118e-05	0.0854878
ENSG00000131165	CHMP1A	0.40725	1.99074e-06	1.84779e-05	0.0882127
ENSG00000115504	EHBP1	-0.396907	1.99209e-06	1.84811e-05	0.0867658
ENSG00000165195	PIGA	-0.505314	1.9962e-06	1.85099e-05	0.112271
ENSG00000143033	MTF2	-0.235454	2.0082e-06	1.86117e-05	0.0501915
ENSG00000166479	TMX3	-0.293081	2.0106e-06	1.86245e-05	0.0628518
ENSG00000175315	CST6	2.17565	2.01458e-06	1.86519e-05	0.526998
ENSG00000265612	MIR4539	1.38813	2.04239e-06	1.88999e-05	0.332772
ENSG00000102543	CDADC1	-0.337147	2.08866e-06	1.93182e-05	0.0732997
ENSG00000076924	XAB2	0.394003	2.09203e-06	1.93396e-05	0.0853688
ENSG00000173540	GMPPB	0.549309	2.09427e-06	1.93506e-05	0.12337
ENSG00000163884	KLF15	1.08859	2.10124e-06	1.94052e-05	0.257887
ENSG00000167900	TK1	1.04721	2.10775e-06	1.94555e-05	0.251158
ENSG00000198087	CD2AP	-0.484674	2.13196e-06	1.96691e-05	0.107675
ENSG00000113569	NUP155	-0.299005	2.13324e-06	1.9671e-05	0.0641869
ENSG00000117174	ZNHIT6	-0.345411	2.20687e-06	2.03396e-05	0.0748969
ENSG00000127564	PKMYT1	1.14943	2.21242e-06	2.03805e-05	0.27646
ENSG00000166478	ZNF143	-0.417371	2.23213e-06	2.05415e-05	0.0925116
ENSG00000175387	SMAD2	-0.29325	2.23166e-06	2.05415e-05	0.0631404
ENSG00000177943	MAMDC4	0.814852	2.23776e-06	2.05829e-05	0.190066
ENSG00000092929	UNC13D	0.594547	2.24099e-06	2.06022e-05	0.13414
ENSG00000120802	TMPO	-0.332013	2.25052e-06	2.06794e-05	0.0709305
ENSG00000200816	SNORA38	1.57249	2.25977e-06	2.0754e-05	0.378066
ENSG00000134109	EDEM1	-0.338887	2.2708e-06	2.08449e-05	0.0737362
ENSG00000082258	CCNT2	-0.336613	2.28666e-06	2.0966e-05	0.0732243
ENSG00000118454	ANKRD13C	-0.290141	2.2858e-06	2.0966e-05	0.0626456
ENSG00000186063	AIDA	-0.35764	2.28743e-06	2.0966e-05	0.0786572
ENSG00000118246	FASTKD2	-0.394935	2.29011e-06	2.09801e-05	0.0866743
[truncated: 4,476 more rows]

## Sheet: TABLE_S4
Table S4. Differentially expressed genes in multiple sclerosis patients at 12 months of fingolimod therapy compared to healthy donors
Ensembl ID	Gene symbol	log2FC	pval	padj	lfcSE
ENSG00000101084	RAB5IF	3.93255	0	0	0.0970587
ENSG00000228253	MT-ATP8	-3.24397	1.25488e-282	1.14345e-278	0.0901456
ENSG00000130748	TMEM160	3.20712	2.63733e-142	1.60209e-138	0.128334
ENSG00000168040	FADD	2.93101	2.98885e-137	1.36172e-133	0.118228
ENSG00000167996	FTH1	3.54442	9.7988e-113	3.57147e-109	0.157718
ENSG00000271303	SRXN1	6.37228	1.5786e-111	4.79472e-108	0.285105
ENSG00000272325	NUDT3	4.44171	1.59743e-103	4.15879e-100	0.209558
ENSG00000243449	C4orf48	4.59654	1.25287e-99	2.85404e-96	0.224211
ENSG00000181588	MEX3D	2.34873	3.44137e-97	6.96839e-94	0.113456
ENSG00000163795	ZNF513	1.02886	2.79381e-96	5.09143e-93	0.0496105
ENSG00000141933	TPGS1	2.02416	2.88753e-93	4.78385e-90	0.0992676
ENSG00000172216	CEBPB	3.10314	4.90221e-93	7.44482e-90	0.153379
ENSG00000107872	FBXL15	2.60379	1.01549e-90	1.42356e-87	0.130191
ENSG00000135766	EGLN1	2.3498	5.39638e-88	7.02455e-85	0.11867
ENSG00000239857	GET4	2.14114	1.27833e-87	1.55309e-84	0.108473
ENSG00000213638	ADAT3	3.37205	5.75999e-86	6.56063e-83	0.174666
ENSG00000257704	INAFM1	2.08759	9.34574e-79	1.00186e-75	0.111682
ENSG00000159884	CCDC107	2.95473	2.47558e-76	2.50639e-73	0.161793
ENSG00000136628	EPRS1	-0.912648	1.9021e-75	1.82442e-72	0.0500315
ENSG00000260428	SCX	2.96164	2.7617e-74	2.51646e-71	0.164219
ENSG00000130725	UBE2M	1.16301	4.11921e-72	3.57469e-69	0.0652597
ENSG00000175756	AURKAIP1	1.35179	4.39774e-71	3.64293e-68	0.0767206
ENSG00000198113	TOR4A	2.12235	2.43436e-69	1.92886e-66	0.122524
ENSG00000130522	JUND	1.77963	2.72244e-68	2.06724e-65	0.102435
ENSG00000170468	RIOX1	0.984526	1.01505e-67	7.39929e-65	0.0568586
ENSG00000011304	PTBP1	0.72262	1.26595e-67	8.87331e-65	0.0417322
ENSG00000142634	EFHD2	1.66714	2.25487e-67	1.52196e-64	0.096819
ENSG00000167657	DAPK3	1.20527	6.64263e-67	4.32341e-64	0.0701858
ENSG00000101940	WDR13	1.06995	8.6399e-67	5.42943e-64	0.0622661
ENSG00000176022	B3GALT6	1.28673	5.27621e-66	3.20512e-63	0.0756196
ENSG00000168282	MGAT2	3.15053	1.59586e-65	9.38162e-63	0.185566
ENSG00000182325	FBXL6	1.25939	5.85786e-65	3.33605e-62	0.0743706
ENSG00000167136	ENDOG	3.24519	2.78333e-64	1.53707e-61	0.193477
ENSG00000135334	AKIRIN2	0.857359	1.62563e-63	8.71337e-61	0.0510741
ENSG00000128915	ICE2	-0.902982	2.03485e-63	1.05952e-60	0.0540707
ENSG00000221869	CEBPD	3.15055	3.26612e-63	1.65338e-60	0.189154
ENSG00000142409	ZNF787	1.94088	6.09068e-63	2.99991e-60	0.118119
ENSG00000139726	DENR	-0.635049	1.53622e-62	7.36739e-60	0.0381024
ENSG00000075292	ZNF638	-0.765032	6.26137e-61	2.92582e-58	0.0466557
ENSG00000184445	KNTC1	-1.20756	1.39247e-60	6.34408e-58	0.0737444
ENSG00000142544	CTU1	2.34782	2.03654e-60	9.05219e-58	0.144937
ENSG00000007520	TSR3	1.35216	2.81453e-60	1.22124e-57	0.0834174
ENSG00000166337	TAF10	1.09448	2.47348e-56	1.0483e-53	0.0693647
ENSG00000213563	C8orf82	1.68097	9.09197e-56	3.76573e-53	0.108016
ENSG00000105723	GSK3A	0.927597	9.31272e-56	3.77145e-53	0.0592589
ENSG00000103266	STUB1	1.63066	1.27598e-55	5.05511e-53	0.105208
ENSG00000126254	RBM42	1.27388	1.3044e-55	5.05774e-53	0.0819358
ENSG00000147119	CHST7	3.06901	9.1812e-55	3.48579e-52	0.199894
ENSG00000140406	TLNRD1	2.01728	3.83758e-54	1.42726e-51	0.131324
ENSG00000102931	ARL2BP	3.50322	5.02461e-54	1.83137e-51	0.229576
ENSG00000196757	ZNF700	-0.777883	6.83615e-53	2.44278e-50	0.0511574
ENSG00000178950	GAK	0.96707	9.59003e-53	3.36094e-50	0.0642601
ENSG00000261221	ZNF865	2.02594	1.22192e-52	4.20155e-50	0.134984
ENSG00000105329	TGFB1	1.71331	1.45411e-52	4.90737e-50	0.11374
ENSG00000078808	SDF4	1.01677	2.15681e-52	7.0263e-50	0.0671022
ENSG00000126461	SCAF1	1.51639	2.15909e-52	7.0263e-50	0.100304
ENSG00000129932	DOHH	1.74184	4.9543e-52	1.55667e-49	0.116027
ENSG00000167394	ZNF668	1.53456	4.88021e-52	1.55667e-49	0.102101
ENSG00000141873	SLC39A3	1.20936	1.54987e-51	4.78727e-49	0.0808032
ENSG00000171222	SCAND1	1.96587	3.33604e-51	1.01327e-48	0.133272
ENSG00000115524	SF3B1	-0.534539	3.67723e-51	1.09859e-48	0.0355478
ENSG00000126453	BCL2L12	0.905723	4.94331e-51	1.45301e-48	0.0603503
ENSG00000099804	CDC34	1.25788	6.13023e-51	1.77329e-48	0.0845093
ENSG00000144589	STK11IP	0.728002	7.9375e-51	2.2602e-48	0.0487605
ENSG00000104885	DOT1L	2.00261	1.23661e-50	3.46707e-48	0.135164
ENSG00000147274	RBMX	-0.755436	2.03295e-50	5.61341e-48	0.0505798
ENSG00000185000	DGAT1	1.10692	3.09293e-50	8.41276e-48	0.0750323
ENSG00000163655	GMPS	-0.54113	1.79541e-49	4.81169e-47	0.0367372
ENSG00000180376	CCDC66	-1.25407	2.07211e-49	5.47276e-47	0.0856504
ENSG00000088205	DDX18	-0.639776	6.03494e-49	1.57115e-46	0.0438669
ENSG00000116871	MAP7D1	1.32076	6.1675e-49	1.58305e-46	0.0909309
ENSG00000160087	UBE2J2	0.85212	8.78098e-49	2.22256e-46	0.0585132
ENSG00000149308	NPAT	-1.26758	9.89778e-49	2.47092e-46	0.0869419
ENSG00000063245	EPN1	1.35898	8.15139e-48	2.00744e-45	0.0946711
ENSG00000109180	OCIAD1	-0.48272	1.33243e-47	3.23763e-45	0.0333763
ENSG00000198918	RPL39	-1.9576	2.33571e-47	5.60079e-45	0.137751
ENSG00000188486	H2AX	1.4335	3.52144e-47	8.33439e-45	0.100299
ENSG00000173153	ESRRA	1.53865	5.35916e-47	1.25212e-44	0.109323
ENSG00000123144	TRIR	1.06526	1.648e-46	3.80166e-44	0.0750934
ENSG00000179271	GADD45GIP1	1.58871	1.68157e-46	3.83061e-44	0.112947
ENSG00000111684	LPCAT3	0.836313	1.84146e-46	4.14305e-44	0.0587728
ENSG00000108839	ALOX12	0.989736	5.96509e-46	1.32571e-43	0.0700964
ENSG00000004059	ARF5	0.936982	7.16308e-46	1.57277e-43	0.0664594
ENSG00000286264		2.43466	1.02457e-45	2.22282e-43	0.175291
ENSG00000196531	NACA	-1.10571	1.26538e-45	2.71298e-43	0.0788559
ENSG00000177034	MTX3	-1.28056	1.30618e-45	2.76788e-43	0.0909751
ENSG00000131116	ZNF428	1.84184	1.37531e-45	2.88088e-43	0.13289
ENSG00000088766	CRLS1	1.71661	1.78822e-45	3.70325e-43	0.122918
ENSG00000104231	ZFAND1	-1.23485	2.17206e-45	4.4476e-43	0.0880042
ENSG00000072609	CHFR	0.821551	2.22051e-45	4.49628e-43	0.0584577
ENSG00000141759	TXNL4A	0.685853	5.41428e-45	1.08428e-42	0.0490401
ENSG00000125746	EML2	0.674611	5.9239e-45	1.17345e-42	0.0480786
ENSG00000127445	PIN1	0.872634	6.1712e-45	1.20929e-42	0.0622745
ENSG00000175054	ATR	-0.927415	1.58771e-44	3.07813e-42	0.0664744
ENSG00000087302	RTRAF	-0.532169	1.72483e-44	3.30877e-42	0.0381345
ENSG00000104408	EIF3E	-1.35453	2.00457e-44	3.80534e-42	0.0984547
ENSG00000101199	ARFGAP1	0.823956	2.45062e-44	4.60414e-42	0.0593807
ENSG00000169230	PRELID1	1.79457	2.47754e-44	4.60721e-42	0.129718
ENSG00000103254	ANTKMT	2.54361	2.61628e-44	4.81606e-42	0.188945
ENSG00000197976	AKAP17A	0.79909	2.8633e-44	5.21808e-42	0.0576349
ENSG00000158290	CUL4B	-0.774781	4.5194e-44	8.1546e-42	0.0558137
ENSG00000104859	CLASRP	0.799436	5.82582e-44	1.03884e-41	0.0577891
ENSG00000158417	EIF5B	-0.736493	5.87142e-44	1.03884e-41	0.0533087
ENSG00000051523	CYBA	1.41039	6.37167e-44	1.11651e-41	0.102699
ENSG00000094916	CBX5	-1.21074	1.58031e-43	2.74281e-41	0.0881241
ENSG00000179832	MROH1	1.31731	1.79412e-43	3.08453e-41	0.0963085
ENSG00000214655	ZSWIM8	1.0028	2.24487e-43	3.82342e-41	0.0729876
ENSG00000141002	TCF25	0.605928	2.57132e-43	4.33886e-41	0.0439308
ENSG00000170265	ZNF282	1.13655	4.20933e-43	7.03769e-41	0.0831183
ENSG00000126005	MMP24OS	1.26564	1.04062e-42	1.72402e-40	0.0929995
ENSG00000198791	CNOT7	-0.626497	1.24667e-42	2.04679e-40	0.0457553
ENSG00000176619	LMNB2	0.965293	1.87505e-42	3.05097e-40	0.0711732
ENSG00000153187	HNRNPU	-0.534691	2.79053e-42	4.50041e-40	0.0392743
ENSG00000105963	ADAP1	2.2168	2.92379e-42	4.67396e-40	0.167085
ENSG00000167470	MIDN	1.47355	3.27818e-42	5.19492e-40	0.109385
ENSG00000178026	LRRC75B	1.88003	3.797e-42	5.96522e-40	0.140784
ENSG00000169228	RAB24	2.22826	5.629e-42	8.76777e-40	0.165746
ENSG00000198862	LTN1	-0.59643	6.3833e-42	9.85841e-40	0.0440691
ENSG00000187109	NAP1L1	-1.0124	6.47541e-42	9.91663e-40	0.0750695
ENSG00000148229	POLE3	-0.576241	8.79922e-42	1.33631e-39	0.0426978
ENSG00000218891	ZNF579	2.04995	1.11669e-41	1.68186e-39	0.153079
ENSG00000115266	APC2	1.49918	1.14248e-41	1.7066e-39	0.112398
ENSG00000161904	LEMD2	0.675249	1.28893e-41	1.90971e-39	0.050399
ENSG00000136937	NCBP1	-0.406047	2.00346e-41	2.94444e-39	0.0301412
ENSG00000141425	RPRD1A	-0.462039	2.86895e-41	4.18271e-39	0.0343761
ENSG00000151092	NGLY1	-0.654408	3.34718e-41	4.8412e-39	0.0489241
ENSG00000154370	TRIM11	0.712416	3.52523e-41	5.05857e-39	0.0531807
ENSG00000140521	POLG	0.588299	4.12368e-41	5.87109e-39	0.0438804
ENSG00000169564	PCBP1	2.244	6.42705e-41	9.07958e-39	0.170939
ENSG00000105254	TBCB	0.816883	9.00736e-41	1.26269e-38	0.0615093
ENSG00000182095	TNRC18	1.63895	9.61193e-41	1.33716e-38	0.124445
ENSG00000147677	EIF3H	-0.828222	1.13455e-40	1.56637e-38	0.0625692
ENSG00000144381	HSPD1	-0.994861	1.61355e-40	2.21092e-38	0.0752223
ENSG00000161179	YDJC	1.30541	2.29837e-40	3.12579e-38	0.0995753
ENSG00000184897	H1-10	2.21405	3.08994e-40	4.17119e-38	0.168687
ENSG00000134709	HOOK1	-2.71389	3.6493e-40	4.89006e-38	0.207347
ENSG00000161677	JOSD2	1.92574	3.93868e-40	5.23931e-38	0.148404
ENSG00000079246	XRCC5	-0.427559	1.20416e-39	1.59019e-37	0.0326395
ENSG00000127554	GFER	1.17611	1.33465e-39	1.74983e-37	0.0904066
ENSG00000136153	LMO7	-1.92889	1.95988e-39	2.5512e-37	0.148785
ENSG00000149100	EIF3M	-0.864028	4.55517e-39	5.88748e-37	0.0666237
ENSG00000125817	CENPB	1.10735	7.1432e-39	9.16744e-37	0.0862838
ENSG00000164941	INTS8	-0.835628	8.64597e-39	1.10185e-36	0.0645813
ENSG00000241360	PDXP	3.06179	1.04294e-38	1.3199e-36	0.239271
ENSG00000009307	CSDE1	-0.453809	1.36067e-38	1.71012e-36	0.0349613
ENSG00000120699	EXOSC8	-0.746767	1.6072e-38	2.00614e-36	0.0577941
ENSG00000099783	HNRNPM	0.601437	2.39628e-38	2.97073e-36	0.0465497
ENSG00000118412	CASP8AP2	-1.07681	2.93622e-38	3.61552e-36	0.0845109
ENSG00000006634	DBF4	-0.8178	3.62611e-38	4.43505e-36	0.063918
ENSG00000146834	MEPCE	1.36269	4.13554e-38	5.02441e-36	0.106476
ENSG00000178951	ZBTB7A	1.45656	4.20312e-38	5.07269e-36	0.114798
ENSG00000185803	SLC52A2	1.14036	4.9557e-38	5.94162e-36	0.089703
ENSG00000134419	RPS15A	-1.93341	5.01527e-38	5.97374e-36	0.153494
ENSG00000116685	KIAA2013	1.01515	5.69137e-38	6.73503e-36	0.0798441
ENSG00000182768	NGRN	1.20456	5.89134e-38	6.9267e-36	0.0949568
ENSG00000137207	YIPF3	0.600756	7.15641e-38	8.36016e-36	0.0468938
ENSG00000181690	PLAG1	-2.2374	1.00079e-37	1.16168e-35	0.176074
ENSG00000161011	SQSTM1	1.32141	1.09012e-37	1.25736e-35	0.104358
ENSG00000173338	KCNK7	1.95867	1.14628e-37	1.31382e-35	0.155769
ENSG00000169221	TBC1D10B	0.991897	1.62329e-37	1.84893e-35	0.0779003
ENSG00000184575	XPOT	-0.65462	2.10057e-37	2.37769e-35	0.0516552
ENSG00000182670	TTC3	-0.955144	2.34174e-37	2.63432e-35	0.0753447
ENSG00000005007	UPF1	0.804218	2.91112e-37	3.25474e-35	0.0630985
ENSG00000235863	B3GALT4	1.09795	3.09206e-37	3.43596e-35	0.0871776
ENSG00000183431	SF3A3	-0.525416	3.51271e-37	3.87973e-35	0.0414278
ENSG00000136997	MYC	-2.20285	3.73192e-37	4.09702e-35	0.175135
ENSG00000118246	FASTKD2	-0.75118	3.92113e-37	4.27896e-35	0.0593103
ENSG00000148516	ZEB1	-2.11417	4.10706e-37	4.45518e-35	0.16759
ENSG00000135164	DMTF1	-0.600433	5.15619e-37	5.56014e-35	0.04723
ENSG00000113649	TCERG1	-0.586992	5.50224e-37	5.89841e-35	0.0463656
ENSG00000184260	H2AC20	2.41574	7.14286e-37	7.61237e-35	0.192591
ENSG00000127980	PEX1	-0.841904	9.67401e-37	1.02499e-34	0.0667697
ENSG00000118482	PHF3	-0.680268	1.74282e-36	1.8359e-34	0.0539684
ENSG00000119574	ZBTB45	1.47469	1.95283e-36	2.04531e-34	0.118528
ENSG00000175416	CLTB	1.25156	3.69879e-36	3.85182e-34	0.101483
ENSG00000099364	FBXL19	1.23746	3.8016e-36	3.93638e-34	0.0993309
ENSG00000116984	MTR	-0.898889	4.47533e-36	4.53999e-34	0.0723014
ENSG00000152942	RAD17	-0.934314	4.48418e-36	4.53999e-34	0.075136
ENSG00000171161	ZNF672	0.921375	4.43582e-36	4.53999e-34	0.0738669
ENSG00000182973	CNOT10	-0.616328	4.43151e-36	4.53999e-34	0.0494117
ENSG00000130638	ATXN10	-0.555569	4.82101e-36	4.83367e-34	0.044475
ENSG00000204271	SPIN3	-1.83116	4.8273e-36	4.83367e-34	0.1492
ENSG00000171813	PWWP2B	1.62322	5.2708e-36	5.24891e-34	0.132702
ENSG00000258429	PDF	3.95784	6.26839e-36	6.20844e-34	0.322526
ENSG00000110719	TCIRG1	1.85661	7.14918e-36	7.04253e-34	0.150988
ENSG00000106244	PDAP1	0.567843	7.94349e-36	7.78291e-34	0.0456996
ENSG00000105229	PIAS4	1.15212	8.13358e-36	7.92655e-34	0.0933302
ENSG00000130382	MLLT1	0.92318	8.57178e-36	8.30915e-34	0.0743988
ENSG00000242802	AP5Z1	1.23479	9.46956e-36	9.13086e-34	0.100199
ENSG00000104825	NFKBIB	1.44497	1.00742e-35	9.58771e-34	0.117049
ENSG00000110013	SIAE	-1.03891	1.00839e-35	9.58771e-34	0.0843859
ENSG00000125898	FAM110A	1.77724	1.01012e-35	9.58771e-34	0.143611
ENSG00000018699	TTC27	-1.12174	1.08051e-35	1.02027e-33	0.0908012
ENSG00000070756	PABPC1	-1.1772	1.12444e-35	1.05503e-33	0.0960946
ENSG00000160404	TOR2A	1.21306	1.1289e-35	1.05503e-33	0.0987674
ENSG00000187325	TAF9B	-1.06332	1.90135e-35	1.76787e-33	0.0862058
ENSG00000078902	TOLLIP	1.17837	2.18183e-35	2.01835e-33	0.0965511
ENSG00000198393	ZNF26	-0.603713	2.33484e-35	2.149e-33	0.0488295
ENSG00000063169	BICRA	1.13817	3.11776e-35	2.84289e-33	0.0926054
ENSG00000113318	MSH3	-0.756131	3.11994e-35	2.84289e-33	0.0613654
ENSG00000197961	ZNF121	-1.24347	3.44634e-35	3.12468e-33	0.101394
ENSG00000132424	PNISR	-0.701367	3.71469e-35	3.35131e-33	0.0568398
ENSG00000170619	COMMD5	1.28467	3.77904e-35	3.39257e-33	0.105223
ENSG00000081386	ZNF510	-0.945628	3.95606e-35	3.53408e-33	0.0768474
ENSG00000269343	ZNF587B	-0.997668	4.033e-35	3.58524e-33	0.0811362
ENSG00000186298	PPP1CC	-0.429575	4.13638e-35	3.65929e-33	0.0348545
ENSG00000066651	TRMT11	-1.0168	4.42345e-35	3.89435e-33	0.0828311
ENSG00000136807	CDK9	0.796323	5.07555e-35	4.44696e-33	0.064763
ENSG00000185246	PRPF39	-0.654796	5.22398e-35	4.55511e-33	0.053377
ENSG00000058804	NDC1	-1.00911	5.63699e-35	4.89183e-33	0.0825821
ENSG00000182087	TMEM259	1.15285	6.24973e-35	5.39787e-33	0.0947176
ENSG00000162600	OMA1	-0.843502	8.20254e-35	7.05109e-33	0.0692409
ENSG00000105669	COPE	1.16483	8.90679e-35	7.62053e-33	0.0961469
ENSG00000088451	TGDS	-0.699819	1.14768e-34	9.77352e-33	0.0572673
ENSG00000107625	DDX50	-0.739551	1.44702e-34	1.22654e-32	0.0606943
ENSG00000156976	EIF4A2	-0.757457	1.60554e-34	1.3546e-32	0.0622348
ENSG00000165644	COMTD1	1.94084	2.17554e-34	1.82705e-32	0.162661
ENSG00000156508	EEF1A1	-0.82711	2.50864e-34	2.09713e-32	0.0682124
ENSG00000196961	AP2A1	1.00136	3.09849e-34	2.57839e-32	0.0823488
ENSG00000175768	TOMM5	-1.55059	3.43409e-34	2.84467e-32	0.128901
ENSG00000113575	PPP2CA	0.839058	3.55459e-34	2.91797e-32	0.0694456
ENSG00000124207	CSE1L	-0.703637	3.55083e-34	2.91797e-32	0.0580561
ENSG00000166263	STXBP4	-1.21783	3.74081e-34	3.05706e-32	0.10104
ENSG00000167395	ZNF646	1.01919	3.86707e-34	3.14614e-32	0.0845665
ENSG00000103275	UBE2I	0.47596	4.04288e-34	3.27455e-32	0.0390977
ENSG00000162236	STX5	0.56056	4.48501e-34	3.61659e-32	0.0462614
ENSG00000167635	ZNF146	-0.847891	5.0081e-34	4.0206e-32	0.0702496
ENSG00000128534	LSM8	-0.561563	6.616e-34	5.28816e-32	0.0463238
ENSG00000141551	CSNK1D	0.655065	6.7022e-34	5.33366e-32	0.0541136
ENSG00000165804	ZNF219	2.24366	7.51836e-34	5.95716e-32	0.190291
ENSG00000104853	CLPTM1	0.805964	8.14041e-34	6.42212e-32	0.0670951
ENSG00000113328	CCNG1	-1.14729	8.60873e-34	6.7623e-32	0.0956029
ENSG00000170791	CHCHD7	-0.791655	9.33391e-34	7.30048e-32	0.0656092
ENSG00000169288	MRPL1	-0.888606	1.02228e-33	7.96155e-32	0.0749675
ENSG00000060069	CTDP1	1.00693	1.0505e-33	8.14655e-32	0.0840003
ENSG00000076984	MAP2K7	0.898302	1.14653e-33	8.85353e-32	0.0749712
ENSG00000196182	STK40	1.0904	1.24638e-33	9.58401e-32	0.0910923
ENSG00000119559	C19orf25	0.959692	1.43239e-33	1.0968e-31	0.0804141
ENSG00000039650	PNKP	0.825524	1.74236e-33	1.32857e-31	0.0688046
ENSG00000173145	NOC3L	-0.960286	2.05104e-33	1.55742e-31	0.0804443
ENSG00000161956	SENP3	0.707938	2.06969e-33	1.56506e-31	0.0592485
ENSG00000137154	RPS6	-1.57571	2.3204e-33	1.74739e-31	0.133321
ENSG00000176101	SSNA1	0.965861	2.36534e-33	1.77391e-31	0.0815975
ENSG00000100106	TRIOBP	0.972294	2.99842e-33	2.23947e-31	0.0822266
ENSG00000180921	FAM83H	1.54725	3.11422e-33	2.31647e-31	0.130251
ENSG00000163002	NUP35	-0.923725	3.22775e-33	2.39116e-31	0.0776144
ENSG00000166197	NOLC1	-0.791089	3.9478e-33	2.91274e-31	0.0663289
ENSG00000185359	HGS	1.18508	6.11248e-33	4.49169e-31	0.100052
ENSG00000158792	SPATA2L	1.48399	6.26993e-33	4.58888e-31	0.126057
ENSG00000036549	ZZZ3	-0.984363	6.41295e-33	4.67478e-31	0.0836073
ENSG00000124193	SRSF6	-0.721141	6.62968e-33	4.81352e-31	0.0606995
ENSG00000112306	RPS12	-1.57276	6.87065e-33	4.96868e-31	0.134119
ENSG00000198586	TLK1	-0.839878	7.8194e-33	5.63244e-31	0.0706613
ENSG00000155876	RRAGA	0.611372	8.07076e-33	5.79061e-31	0.0514644
ENSG00000026036	RTEL1-TNFRSF6B	1.15284	9.25761e-33	6.6161e-31	0.0979264
ENSG00000141526	SLC16A3	2.26842	9.74012e-33	6.93375e-31	0.19499
ENSG00000172780	RAB43	1.99939	1.02599e-32	7.27533e-31	0.170453
ENSG00000077463	SIRT6	1.14583	1.23384e-32	8.71531e-31	0.0973058
ENSG00000065183	WDR3	-1.08317	1.28196e-32	9.02022e-31	0.092086
ENSG00000185262	UBALD2	1.45254	1.51793e-32	1.05987e-30	0.123328
ENSG00000229809	ZNF688	0.972469	1.51763e-32	1.05987e-30	0.0824889
ENSG00000076944	STXBP2	1.28055	1.55051e-32	1.07849e-30	0.108982
ENSG00000142459	EVI5L	1.09399	1.64188e-32	1.13771e-30	0.0932275
ENSG00000141522	ARHGDIA	0.996763	1.76368e-32	1.21747e-30	0.0843337
ENSG00000128228	SDF2L1	2.16814	1.80754e-32	1.24304e-30	0.190677
ENSG00000090372	STRN4	1.05269	1.85325e-32	1.26968e-30	0.0903119
ENSG00000176845	METRNL	2.09816	1.92078e-32	1.30613e-30	0.180329
ENSG00000186635	ARAP1	1.26469	1.9165e-32	1.30613e-30	0.108706
ENSG00000007047	MARK4	1.07576	2.13961e-32	1.44953e-30	0.0918008
ENSG00000188986	NELFB	0.804064	2.28838e-32	1.54457e-30	0.0685628
ENSG00000136877	FPGS	1.2299	2.41263e-32	1.62243e-30	0.105052
ENSG00000071626	DAZAP1	0.664044	3.13567e-32	2.10039e-30	0.0573429
ENSG00000100075	SLC25A1	1.20559	3.14643e-32	2.10039e-30	0.103836
ENSG00000153443	UBALD1	1.32291	3.51665e-32	2.33896e-30	0.113457
ENSG00000138073	PREB	0.610128	3.85389e-32	2.55394e-30	0.0518852
ENSG00000139746	RBM26	-0.939346	3.96731e-32	2.61958e-30	0.0800904
ENSG00000166226	CCT2	-0.588976	4.74109e-32	3.11919e-30	0.0503765
ENSG00000100578	KIAA0586	-0.92054	4.81988e-32	3.15962e-30	0.0787704
ENSG00000197483	ZNF628	1.83296	5.11582e-32	3.3416e-30	0.158498
ENSG00000177666	PNPLA2	0.995294	6.6942e-32	4.35697e-30	0.0851991
ENSG00000112159	MDN1	-1.00891	8.76471e-32	5.68427e-30	0.0866689
ENSG00000284286	MIR718	11.832	9.79407e-32	6.32933e-30	3.00584
ENSG00000133112	TPT1	-1.31625	1.00309e-31	6.45946e-30	0.11558
ENSG00000163041	H3-3A	0.85311	1.12865e-31	7.24246e-30	0.0731474
ENSG00000160410	SHKBP1	1.12066	1.14316e-31	7.30981e-30	0.0964668
ENSG00000182544	MFSD5	0.782209	1.35798e-31	8.65311e-30	0.0675411
ENSG00000136897	MRPL50	-0.771603	1.50249e-31	9.51162e-30	0.0664249
ENSG00000197857	ZNF44	-1.08207	1.50315e-31	9.51162e-30	0.0932789
ENSG00000132005	RFX1	1.32493	1.53051e-31	9.6512e-30	0.114926
ENSG00000179922	ZNF784	1.10561	1.564e-31	9.82839e-30	0.0956663
ENSG00000108559	NUP88	-0.729269	1.65839e-31	1.03858e-29	0.0627892
ENSG00000156639	ZFAND3	0.910707	1.68303e-31	1.0504e-29	0.0784816
ENSG00000047410	TPR	-0.653377	1.99157e-31	1.23871e-29	0.056175
ENSG00000163608	NEPRO	-0.740326	2.02874e-31	1.25754e-29	0.0641689
ENSG00000138182	KIF20B	-1.45333	2.7638e-31	1.70737e-29	0.12635
ENSG00000197982	C1orf122	2.02011	3.33075e-31	2.05066e-29	0.175736
ENSG00000163322	ABRAXAS1	-1.16766	3.57514e-31	2.19372e-29	0.101581
ENSG00000151623	NR3C2	-1.63715	3.82915e-31	2.34169e-29	0.143235
ENSG00000165733	BMS1	-0.658736	4.4539e-31	2.71464e-29	0.0571548
ENSG00000167674	HDGFL2	0.8377	4.83372e-31	2.93632e-29	0.0731149
ENSG00000124383	MPHOSPH10	-0.792589	4.95088e-31	2.9975e-29	0.0689162
ENSG00000178105	DDX10	-0.934753	5.98789e-31	3.61335e-29	0.0814605
ENSG00000169026	SLC49A3	2.17932	6.66406e-31	4.00812e-29	0.192761
ENSG00000181135	ZNF707	0.818097	7.71679e-31	4.62601e-29	0.0713396
ENSG00000079999	KEAP1	0.834287	8.15981e-31	4.87556e-29	0.0729389
ENSG00000159069	FBXW5	1.51962	8.8584e-31	5.27567e-29	0.13407
ENSG00000126261	UBA2	-0.484004	8.93949e-31	5.30662e-29	0.0422117
ENSG00000169131	ZNF354A	-0.598381	9.90117e-31	5.85841e-29	0.0521114
ENSG00000178057	NDUFAF3	1.04723	1.02657e-30	6.05444e-29	0.091926
ENSG00000147231	RADX	-1.71527	1.06473e-30	6.25924e-29	0.150956
ENSG00000164713	BRI3	1.95408	1.45617e-30	8.53286e-29	0.174228
ENSG00000099624	ATP5F1D	1.34684	1.57139e-30	9.17852e-29	0.119965
ENSG00000198522	GPN1	-0.534085	1.87139e-30	1.08959e-28	0.0469399
ENSG00000131165	CHMP1A	0.925615	1.883e-30	1.09286e-28	0.0812423
ENSG00000196683	TOMM7	-1.35037	1.94184e-30	1.12343e-28	0.11948
ENSG00000174276	ZNHIT2	1.3221	2.07031e-30	1.19396e-28	0.117073
ENSG00000039123	MTREX	-0.467735	2.15569e-30	1.23929e-28	0.0410029
ENSG00000144579	CTDSP1	0.887199	2.16445e-30	1.24041e-28	0.0785168
ENSG00000152601	MBNL1	-0.58242	2.21386e-30	1.26475e-28	0.0509374
ENSG00000181220	ZNF746	0.946112	2.4533e-30	1.39715e-28	0.0834838
ENSG00000172354	GNB2	1.21973	2.57468e-30	1.46171e-28	0.107912
ENSG00000179091	CYC1	0.974211	3.16284e-30	1.79005e-28	0.0863894
ENSG00000147654	EBAG9	-0.799409	3.25438e-30	1.83615e-28	0.0705798
ENSG00000163714	U2SURP	-0.627819	3.31927e-30	1.86699e-28	0.0549386
ENSG00000161671	EMC10	0.953942	3.6376e-30	2.03974e-28	0.0850442
ENSG00000115368	WDR75	-0.995727	3.66092e-30	2.04652e-28	0.0880361
ENSG00000167797	CDK2AP2	1.05025	3.69205e-30	2.05761e-28	0.0938105
ENSG00000083535	PIBF1	-0.714225	3.74559e-30	2.07818e-28	0.0628987
ENSG00000114857	NKTR	-0.800083	3.75176e-30	2.07818e-28	0.0704483
ENSG00000177733	HNRNPA0	0.619269	3.9289e-30	2.1697e-28	0.0544941
ENSG00000125676	THOC2	-0.445108	4.05537e-30	2.23278e-28	0.0391264
ENSG00000132849	PATJ	-1.70056	4.74228e-30	2.60311e-28	0.151526
ENSG00000189180	ZNF33A	-0.816091	5.09739e-30	2.78963e-28	0.0723218
ENSG00000161970	RPL26	-1.47812	5.34697e-30	2.91746e-28	0.13275
ENSG00000181163	NPM1	-1.12229	6.99707e-30	3.80641e-28	0.100446
ENSG00000160972	PPP1R16A	1.66646	7.15285e-30	3.87957e-28	0.148973
ENSG00000162623	TYW3	-0.77498	7.20846e-30	3.89813e-28	0.0689155
ENSG00000198517	MAFK	1.51525	7.42183e-30	4.00164e-28	0.136087
ENSG00000164284	GRPEL2	-1.40537	7.70667e-30	4.14296e-28	0.125498
ENSG00000174132	FAM174A	1.0397	8.06462e-30	4.32264e-28	0.0926843
ENSG00000130479	MAP1S	1.63364	8.36039e-30	4.46803e-28	0.147436
ENSG00000220008	LINGO3	2.33326	8.66176e-30	4.61555e-28	0.210639
ENSG00000170222	ADPRM	-1.18976	8.8384e-30	4.69595e-28	0.106081
ENSG00000112701	SENP6	-0.656952	1.02035e-29	5.40548e-28	0.0582289
ENSG00000162607	USP1	-0.553281	1.13382e-29	5.98921e-28	0.0491608
ENSG00000144161	ZC3H8	-1.39518	1.18192e-29	6.22521e-28	0.125249
ENSG00000163607	GTPBP8	-0.861894	1.34295e-29	7.05301e-28	0.0769296
ENSG00000204628	RACK1	-0.763839	1.35066e-29	7.07309e-28	0.0697963
ENSG00000176390	CRLF3	-0.698579	1.38104e-29	7.21148e-28	0.062015
ENSG00000116251	RPL22	-1.22953	1.40742e-29	7.32825e-28	0.109984
ENSG00000137760	ALKBH8	-1.03569	1.54225e-29	8.00737e-28	0.0927272
ENSG00000170006	TMEM154	-1.94986	1.66369e-29	8.61339e-28	0.176474
ENSG00000174903	RAB1B	0.859641	1.78062e-29	9.19263e-28	0.077342
ENSG00000103507	BCKDK	1.34512	1.89929e-29	9.77761e-28	0.121215
ENSG00000163946	TASOR	-0.684708	1.94303e-29	9.9746e-28	0.0611542
ENSG00000067182	TNFRSF1A	1.21136	2.26663e-29	1.16031e-27	0.10937
ENSG00000068796	KIF2A	-1.3181	2.38724e-29	1.21863e-27	0.119296
ENSG00000047188	YTHDC2	-0.443907	2.63446e-29	1.34107e-27	0.0395527
ENSG00000125970	RALY	0.764083	2.69089e-29	1.36598e-27	0.0687419
ENSG00000134086	VHL	0.878555	2.71267e-29	1.37321e-27	0.0783986
ENSG00000158987	RAPGEF6	-1.35758	2.75947e-29	1.39303e-27	0.122364
ENSG00000160813	PPP1R35	1.5872	3.48996e-29	1.75694e-27	0.144277
ENSG00000165175	MID1IP1	1.50101	3.77109e-29	1.89323e-27	0.136379
ENSG00000166189	HPS6	1.15098	4.66976e-29	2.33796e-27	0.104395
ENSG00000100243	CYB5R3	1.1277	5.25737e-29	2.62494e-27	0.10196
ENSG00000187808	SOWAHD	2.15065	5.29373e-29	2.63587e-27	0.197511
ENSG00000164172	MOCS2	-0.857628	5.42279e-29	2.69278e-27	0.0777188
ENSG00000122406	RPL5	-1.37675	5.68972e-29	2.81765e-27	0.125529
ENSG00000121864	ZNF639	-0.809533	5.86281e-29	2.89549e-27	0.0729224
ENSG00000115053	NCL	-0.61367	5.99577e-29	2.95316e-27	0.0556881
ENSG00000143947	RPS27A	-1.48883	6.22196e-29	3.05631e-27	0.136103
ENSG00000043514	TRIT1	-0.856893	6.31889e-29	3.09558e-27	0.0776909
ENSG00000259956	RBM15B	0.406914	6.36033e-29	3.10752e-27	0.0365609
ENSG00000029639	TFB1M	-0.926454	6.89409e-29	3.3593e-27	0.0837008
ENSG00000076201	PTPN23	0.93249	7.05482e-29	3.42846e-27	0.0844176
ENSG00000152894	PTPRK	-2.70788	7.21308e-29	3.49604e-27	0.248496
ENSG00000134815	DHX34	1.21388	7.56837e-29	3.65851e-27	0.110198
ENSG00000143971	ETAA1	-0.874421	7.92659e-29	3.82154e-27	0.079064
ENSG00000159086	PAXBP1	-0.659222	8.11578e-29	3.90242e-27	0.0594445
ENSG00000135521	LTV1	-1.0754	8.17444e-29	3.92029e-27	0.0975277
ENSG00000145348	TBCK	-0.637385	9.12339e-29	4.3639e-27	0.057475
ENSG00000121851	POLR3GL	-0.85843	9.66484e-29	4.61078e-27	0.0778671
ENSG00000133704	IPO8	-0.408245	1.19655e-28	5.67862e-27	0.0368144
ENSG00000179632	MAF1	0.754118	1.19554e-28	5.67862e-27	0.0680496
ENSG00000241343	RPL36A	-0.713413	1.25604e-28	5.94549e-27	0.064677
ENSG00000127564	PKMYT1	2.16764	1.35505e-28	6.39752e-27	0.202953
ENSG00000166188	ZNF319	1.09009	1.36474e-28	6.42662e-27	0.0992062
ENSG00000164346	NSA2	-0.972102	1.54077e-28	7.23685e-27	0.0891243
ENSG00000175137	SH3BP5L	0.662772	1.54527e-28	7.23933e-27	0.0604145
ENSG00000253352	TUG1	-0.470884	1.59209e-28	7.43953e-27	0.0425444
ENSG00000269335	IKBKG	0.874971	1.74492e-28	8.13286e-27	0.0794954
ENSG00000109736	MFSD10	1.23671	1.91202e-28	8.88894e-27	0.113896
ENSG00000205758	CRYZL1	-0.569197	2.04924e-28	9.50264e-27	0.0516423
ENSG00000144554	FANCD2	-1.15688	2.50482e-28	1.15857e-26	0.106154
ENSG00000129968	ABHD17A	1.55943	2.55485e-28	1.17872e-26	0.14425
ENSG00000066336	SPI1	1.89929	2.66306e-28	1.22554e-26	0.176434
ENSG00000133872	SARAF	-0.846602	2.92422e-28	1.34234e-26	0.0776903
ENSG00000090612	ZNF268	-0.632406	2.96213e-28	1.35633e-26	0.0577225
ENSG00000106636	YKT6	0.731334	3.15537e-28	1.44119e-26	0.066773
ENSG00000071859	FAM50A	0.796992	3.23258e-28	1.47277e-26	0.0732368
ENSG00000134759	ELP2	-0.986991	3.59736e-28	1.63487e-26	0.0909646
ENSG00000005175	RPAP3	-0.747761	3.63642e-28	1.64851e-26	0.0684334
ENSG00000196498	NCOR2	1.75202	3.81042e-28	1.7231e-26	0.163383
ENSG00000187531	SIRT7	0.59777	4.28345e-28	1.93222e-26	0.0546807
ENSG00000172922	RNASEH2C	0.711699	4.84939e-28	2.18211e-26	0.0652578
ENSG00000181027	FKRP	0.783346	4.89414e-28	2.19682e-26	0.0720441
ENSG00000137054	POLR1E	-0.940052	5.10186e-28	2.28443e-26	0.0865488
ENSG00000164889	SLC4A2	1.30618	5.30018e-28	2.36741e-26	0.120863
ENSG00000151806	GUF1	-0.616493	5.89835e-28	2.62815e-26	0.0566303
ENSG00000128699	ORMDL1	-0.749546	6.06365e-28	2.69522e-26	0.0689462
ENSG00000114942	EEF1B2	-1.56243	6.56898e-28	2.91273e-26	0.146587
ENSG00000204308	RNF5	0.602726	7.00566e-28	3.09881e-26	0.0553311
ENSG00000163930	BAP1	0.425535	7.27847e-28	3.21169e-26	0.0389802
ENSG00000106591	MRPL32	-0.741906	8.10032e-28	3.56571e-26	0.0683828
ENSG00000122026	RPL21	-1.52511	8.77884e-28	3.85507e-26	0.142633
ENSG00000118900	UBN1	0.435891	8.80322e-28	3.85649e-26	0.0399694
ENSG00000160691	SHC1	0.639269	8.85701e-28	3.87075e-26	0.0590602
ENSG00000171302	CANT1	0.887597	9.1648e-28	3.99568e-26	0.0818798
ENSG00000135829	DHX9	-0.389464	9.51545e-28	4.13865e-26	0.0353845
ENSG00000151413	NUBPL	-1.19411	9.97204e-28	4.32692e-26	0.111272
ENSG00000103249	CLCN7	1.30759	1.02192e-27	4.42362e-26	0.12167
ENSG00000187187	ZNF546	-1.24075	1.02946e-27	4.44571e-26	0.115131
ENSG00000167543	TP53I13	1.08156	1.03408e-27	4.45511e-26	0.0997589
ENSG00000170584	NUDCD2	-0.498136	1.148e-27	4.92261e-26	0.0458459
ENSG00000213015	ZNF580	0.816796	1.14791e-27	4.92261e-26	0.0753501
ENSG00000103549	RNF40	0.591517	1.52282e-27	6.51452e-26	0.0546037
ENSG00000225190	PLEKHM1	0.886731	1.55774e-27	6.6483e-26	0.0825146
ENSG00000101152	DNAJC5	0.897894	1.61765e-27	6.88786e-26	0.0837416
ENSG00000156738	MS4A1	-2.6908	1.74046e-27	7.3935e-26	0.254055
ENSG00000108950	FAM20A	2.22907	1.95712e-27	8.29454e-26	0.209235
ENSG00000133706	LARS1	-1.09664	2.13911e-27	9.04481e-26	0.102738
ENSG00000055917	PUM2	-0.469807	2.17994e-27	9.19614e-26	0.0435849
ENSG00000151500	THYN1	-0.865598	2.24127e-27	9.433e-26	0.0806854
ENSG00000125503	PPP1R12C	1.0578	2.41057e-27	1.01222e-25	0.0991621
ENSG00000154016	GRAP	-1.76962	2.45372e-27	1.02797e-25	0.167561
ENSG00000141627	DYM	-0.357631	3.11922e-27	1.30378e-25	0.0330879
ENSG00000170684	ZNF296	1.61221	3.28951e-27	1.37181e-25	0.152979
ENSG00000160877	NACC1	1.53205	3.35988e-27	1.39796e-25	0.145237
ENSG00000197008	ZNF138	-1.35073	3.56013e-27	1.4779e-25	0.127646
ENSG00000168101	NUDT16L1	0.77534	3.58909e-27	1.48653e-25	0.0727071
ENSG00000136014	USP44	-2.83258	4.03804e-27	1.66869e-25	0.271647
ENSG00000139725	RHOF	2.10798	4.20569e-27	1.73404e-25	0.20153
ENSG00000163702	IL17RC	2.30059	4.28171e-27	1.7614e-25	0.220667
ENSG00000110801	PSMD9	0.795304	4.3887e-27	1.80134e-25	0.0744251
ENSG00000135940	COX5B	0.949345	4.5714e-27	1.87212e-25	0.0900768
ENSG00000167110	GOLGA2	0.624424	4.79827e-27	1.96062e-25	0.058209
ENSG00000138363	ATIC	-1.25413	4.81059e-27	1.96126e-25	0.118812
ENSG00000070610	GBA2	0.479939	4.8953e-27	1.99134e-25	0.0444039
ENSG00000124535	WRNIP1	0.460927	5.67028e-27	2.30145e-25	0.0429691
ENSG00000079134	THOC1	-0.823801	5.76671e-27	2.33539e-25	0.0775765
ENSG00000065357	DGKA	-1.40821	6.07764e-27	2.45453e-25	0.133437
ENSG00000136261	BZW2	-1.28261	6.08783e-27	2.45453e-25	0.12166
ENSG00000049883	PTCD2	-0.991831	7.08625e-27	2.85077e-25	0.0934573
ENSG00000161013	MGAT4B	1.00731	7.2573e-27	2.91315e-25	0.0954623
ENSG00000157426	AASDH	-0.807774	7.35887e-27	2.94743e-25	0.0759096
ENSG00000005436	GCFC2	-1.02034	7.40956e-27	2.96123e-25	0.0963244
ENSG00000132300	PTCD3	-0.714593	7.62571e-27	3.04094e-25	0.0673888
ENSG00000138468	SENP7	-0.938743	8.45086e-27	3.36263e-25	0.0881412
ENSG00000146094	DOK3	1.68674	8.71143e-27	3.45876e-25	0.161547
ENSG00000163935	SFMBT1	-0.993335	9.03763e-27	3.58047e-25	0.0934492
ENSG00000162585	FAAP20	0.774058	9.11481e-27	3.60322e-25	0.0729034
ENSG00000170892	TSEN34	0.728357	9.73906e-27	3.84166e-25	0.0684342
ENSG00000143862	ARL8A	1.13523	1.05295e-26	4.1445e-25	0.107989
ENSG00000173258	ZNF483	-1.68415	1.06349e-26	4.17697e-25	0.161305
ENSG00000120800	UTP20	-1.19243	1.08132e-26	4.23786e-25	0.113078
ENSG00000184867	ARMCX2	-1.20653	1.09115e-26	4.26719e-25	0.114634
ENSG00000178761	FAM219B	0.708698	1.1227e-26	4.38117e-25	0.0664738
ENSG00000111786	SRSF9	0.395367	1.17396e-26	4.57141e-25	0.0370582
ENSG00000167969	ECI1	1.007	1.20577e-26	4.68528e-25	0.0954299
ENSG00000163584	RPL22L1	-0.99207	1.29948e-26	5.03866e-25	0.094359
ENSG00000092201	SUPT16H	-0.396867	1.35771e-26	5.25326e-25	0.0373126
ENSG00000114416	FXR1	-0.418231	1.37053e-26	5.29163e-25	0.0391206
ENSG00000065000	AP3D1	0.871716	1.47316e-26	5.67587e-25	0.0824333
ENSG00000129518	EAPP	-0.427415	1.52382e-26	5.85866e-25	0.0402274
ENSG00000179431	FJX1	2.91697	1.53788e-26	5.90028e-25	0.280804
ENSG00000128309	MPST	1.21659	1.67234e-26	6.40267e-25	0.116097
ENSG00000070444	MNT	0.829312	1.68652e-26	6.44341e-25	0.0788322
ENSG00000119669	IRF2BPL	1.58328	1.7253e-26	6.57781e-25	0.152899
ENSG00000131584	ACAP3	1.17327	1.88376e-26	7.16693e-25	0.112857
ENSG00000112893	MAN2A1	-0.728131	2.11799e-26	8.0413e-25	0.068908
ENSG00000006015	REX1BD	1.43369	2.19524e-26	8.31725e-25	0.138239
ENSG00000126934	MAP2K2	0.950751	2.44084e-26	9.22862e-25	0.0907524
ENSG00000114383	TUSC2	0.61905	2.60691e-26	9.83609e-25	0.0587964
ENSG00000197774	EME2	1.00283	2.73722e-26	1.03064e-24	0.0955146
ENSG00000105464	GRIN2D	1.88286	2.78192e-26	1.04531e-24	0.180992
ENSG00000196305	IARS1	-0.91296	2.8251e-26	1.05935e-24	0.0867377
ENSG00000099889	ARVCF	1.37521	2.88396e-26	1.07921e-24	0.131519
ENSG00000154814	OXNAD1	-1.51427	2.99351e-26	1.1179e-24	0.145134
ENSG00000241878	PISD	0.686843	3.05697e-26	1.13927e-24	0.065441
ENSG00000100749	VRK1	-0.851825	3.07252e-26	1.1404e-24	0.0810125
ENSG00000198034	RPS4X	-1.15858	3.06671e-26	1.1404e-24	0.111221
ENSG00000106443	PHF14	-0.665099	3.80214e-26	1.40834e-24	0.0631764
ENSG00000138398	PPIG	-0.373696	3.90644e-26	1.44403e-24	0.0354756
ENSG00000284194	SCO2	4.63087	4.04927e-26	1.49381e-24	0.448724
ENSG00000241837	ATP5PO	-0.862625	4.20045e-26	1.54645e-24	0.0831578
ENSG00000189114	BLOC1S3	1.01783	4.29868e-26	1.57942e-24	0.0974485
ENSG00000108106	UBE2S	1.46579	4.42804e-26	1.62368e-24	0.140869
ENSG00000198040	ZNF84	-0.949769	4.4447e-26	1.62651e-24	0.0911323
ENSG00000163918	RFC4	-0.912738	4.52862e-26	1.6539e-24	0.0872863
ENSG00000142676	RPL11	-1.12419	4.79277e-26	1.74687e-24	0.107684
ENSG00000149136	SSRP1	-0.598053	5.2894e-26	1.92403e-24	0.0571365
ENSG00000151835	SACS	-0.959335	5.32891e-26	1.93454e-24	0.0918192
ENSG00000185875	THNSL1	-2.13304	5.51538e-26	1.99825e-24	0.207736
ENSG00000099331	MYO9B	1.35315	5.74277e-26	2.07651e-24	0.130912
ENSG00000214029	ZNF891	-1.05594	6.31273e-26	2.27808e-24	0.101086
ENSG00000123395	ATG101	1.02167	7.02335e-26	2.52952e-24	0.0991128
ENSG00000163781	TOPBP1	-0.479005	7.14143e-26	2.56192e-24	0.0456509
ENSG00000178814	OPLAH	2.06631	7.14039e-26	2.56192e-24	0.201806
ENSG00000113558	SKP1	-1.47371	7.40736e-26	2.6521e-24	0.141989
ENSG00000232434	AJM1	2.51693	7.6774e-26	2.74339e-24	0.249126
ENSG00000115484	CCT4	-0.470999	8.70449e-26	3.10432e-24	0.0451636
ENSG00000101421	CHMP4B	0.92229	8.7777e-26	3.12431e-24	0.0887893
ENSG00000112787	FBRSL1	1.08681	8.83456e-26	3.13842e-24	0.105387
ENSG00000141384	TAF4B	-2.03089	9.12476e-26	3.23521e-24	0.197796
ENSG00000166454	ATMIN	-0.458767	9.35757e-26	3.31131e-24	0.0437968
ENSG00000104866	PPP1R37	1.5289	1.09813e-25	3.87836e-24	0.150938
ENSG00000239264	TXNDC5	2.88941	1.19044e-25	4.19626e-24	0.287007
ENSG00000143748	NVL	-0.490459	1.21978e-25	4.29137e-24	0.0470364
ENSG00000104218	CSPP1	-0.687189	1.27204e-25	4.45943e-24	0.066075
ENSG00000149781	FERMT3	1.16399	1.27245e-25	4.45943e-24	0.113037
ENSG00000136630	HLX	2.33493	1.41437e-25	4.94731e-24	0.227363
ENSG00000147604	RPL7	-1.25372	1.46135e-25	5.10184e-24	0.122527
ENSG00000113141	IK	-0.339539	1.50624e-25	5.24851e-24	0.0325029
ENSG00000172366	MCRIP2	1.52564	1.57117e-25	5.46431e-24	0.151506
ENSG00000176095	IP6K1	0.551008	1.70437e-25	5.91627e-24	0.0529697
ENSG00000179456	ZBTB18	-0.926604	1.71009e-25	5.92486e-24	0.089732
ENSG00000099203	TMED1	1.08579	1.71558e-25	5.93257e-24	0.105583
ENSG00000141101	NOB1	-0.816976	1.83484e-25	6.33297e-24	0.0789317
ENSG00000117174	ZNHIT6	-0.927903	1.92917e-25	6.64598e-24	0.0903415
ENSG00000188483	IER5L	3.56503	1.94816e-25	6.69873e-24	0.377381
ENSG00000173137	ADCK5	0.994157	2.07079e-25	7.10698e-24	0.0969772
ENSG00000103064	SLC7A6	-0.980879	2.07491e-25	7.10772e-24	0.0950377
ENSG00000090263	MRPS33	-0.975216	2.10779e-25	7.20682e-24	0.0951177
ENSG00000238227	TMEM250	0.939379	2.22891e-25	7.60669e-24	0.0920878
ENSG00000119397	CNTRL	-0.812518	2.39457e-25	8.15676e-24	0.0782987
ENSG00000143436	MRPL9	-0.607262	2.44891e-25	8.3263e-24	0.0587422
ENSG00000104886	PLEKHJ1	0.757113	2.55452e-25	8.6692e-24	0.0742529
ENSG00000276045	ORAI1	0.886251	2.66652e-25	9.03247e-24	0.0862232
ENSG00000007080	CCDC124	1.10112	2.6981e-25	9.1225e-24	0.108132
ENSG00000213463	SYNJ2BP	-0.792251	2.744e-25	9.26051e-24	0.0770014
ENSG00000186907	RTN4RL2	3.51993	2.77783e-25	9.35734e-24	0.346381
ENSG00000185475	TMEM179B	0.601445	2.83373e-25	9.52803e-24	0.0582581
ENSG00000162341	TPCN2	1.15718	2.90207e-25	9.73984e-24	0.113313
ENSG00000063046	EIF4B	-0.914949	3.09623e-25	1.03724e-23	0.0892238
ENSG00000113048	MRPS27	-0.729138	3.39357e-25	1.13476e-23	0.0709138
ENSG00000130429	ARPC1B	1.0407	3.4474e-25	1.15065e-23	0.101995
ENSG00000002834	LASP1	0.731584	3.47713e-25	1.15845e-23	0.0710655
ENSG00000111615	KRR1	-0.79253	3.53589e-25	1.17588e-23	0.0768585
ENSG00000163870	TPRA1	1.96951	3.64691e-25	1.21059e-23	0.196352
ENSG00000197903	H2BC12	1.19088	3.66668e-25	1.21494e-23	0.116634
ENSG00000173585	CCR9	-2.63807	3.74442e-25	1.23845e-23	0.260989
ENSG00000105708	ZNF14	-1.25322	4.40519e-25	1.45435e-23	0.122488
ENSG00000109929	SC5D	-0.808242	4.4642e-25	1.47117e-23	0.0789294
ENSG00000156469	MTERF3	-0.663302	4.73289e-25	1.55677e-23	0.064655
ENSG00000169567	HINT1	-1.00884	4.74103e-25	1.55677e-23	0.0985349
ENSG00000075884	ARHGAP15	-1.42482	4.92961e-25	1.61578e-23	0.141011
ENSG00000189409	MMP23B	3.91417	5.02024e-25	1.64253e-23	0.394042
ENSG00000137876	RSL24D1	-0.81296	5.62809e-25	1.83811e-23	0.0796455
ENSG00000154174	TOMM70	-0.577278	5.70016e-25	1.85831e-23	0.0562734
ENSG00000108055	SMC3	-0.486405	5.72709e-25	1.86376e-23	0.0472287
ENSG00000160570	DEDD2	1.30305	5.90516e-25	1.91828e-23	0.129455
ENSG00000141985	SH3GL1	1.19895	6.20405e-25	2.01179e-23	0.119218
ENSG00000149923	PPP4C	0.807718	6.25464e-25	2.02459e-23	0.0790137
ENSG00000147548	NSD3	-0.697942	6.34117e-25	2.04896e-23	0.0664965
ENSG00000145741	BTF3	-0.715695	7.47204e-25	2.4101e-23	0.0702453
ENSG00000117335	CD46	-0.391052	8.03407e-25	2.5868e-23	0.0380958
ENSG00000167487	KLHL26	1.16227	8.0876e-25	2.59944e-23	0.114609
ENSG00000075089	ACTR6	-0.719253	8.17892e-25	2.62417e-23	0.0704013
ENSG00000074201	CLNS1A	-0.75799	9.02342e-25	2.88496e-23	0.0745611
ENSG00000126391	FRMD8	0.579898	9.01812e-25	2.88496e-23	0.0561822
ENSG00000033100	CHPF2	0.538755	9.05562e-25	2.89018e-23	0.0519613
ENSG00000141582	CBX4	1.09566	9.1061e-25	2.90122e-23	0.108205
ENSG00000111860	CEP85L	-1.34119	9.35485e-25	2.97527e-23	0.13252
ENSG00000164897	TMUB1	1.2848	9.88097e-25	3.13712e-23	0.127613
ENSG00000146282	RARS2	-0.4454	1.0003e-24	3.17035e-23	0.0434757
ENSG00000232593	KANTR	-1.17193	1.04072e-24	3.29272e-23	0.11594
ENSG00000164466	SFXN1	-1.35904	1.0828e-24	3.41993e-23	0.134563
ENSG00000104142	VPS18	0.89681	1.0868e-24	3.42662e-23	0.0886482
ENSG00000149212	SESN3	-2.57657	1.10924e-24	3.49133e-23	0.256637
ENSG00000069248	NUP133	-0.436736	1.18867e-24	3.7349e-23	0.0427181
ENSG00000163938	GNL3	-0.931725	1.2378e-24	3.88256e-23	0.0919697
ENSG00000129757	CDKN1C	2.38637	1.32624e-24	4.15283e-23	0.238765
ENSG00000168028	RPSA	-1.29075	1.3319e-24	4.16338e-23	0.128675
ENSG00000124126	PREX1	0.974085	1.34224e-24	4.18854e-23	0.0962159
ENSG00000197070	ARRDC1	0.882599	1.53564e-24	4.78385e-23	0.0879627
ENSG00000115947	ORC4	-0.721618	1.77138e-24	5.50881e-23	0.0713021
ENSG00000111875	ASF1A	-0.925296	1.92026e-24	5.96163e-23	0.0917735
ENSG00000008988	RPS20	-0.973663	2.292e-24	7.10363e-23	0.0979189
ENSG00000034152	MAP2K3	1.17038	2.57301e-24	7.95075e-23	0.116479
ENSG00000088387	DOCK9	-1.75172	2.57404e-24	7.95075e-23	0.176141
ENSG00000180900	SCRIB	1.15451	2.61524e-24	8.06432e-23	0.115372
ENSG00000143799	PARP1	-0.668355	2.66952e-24	8.21779e-23	0.0662666
ENSG00000141503	MINK1	0.545909	3.14132e-24	9.65388e-23	0.0541851
ENSG00000040487	SLC66A1	1.24816	3.18981e-24	9.772e-23	0.125441
ENSG00000175938	ORAI3	1.32409	3.19048e-24	9.772e-23	0.134293
ENSG00000173653	RCE1	0.752019	3.21957e-24	9.84454e-23	0.0748876
ENSG00000110171	TRIM3	0.653366	3.74243e-24	1.14241e-22	0.0650279
ENSG00000187555	USP7	-0.37377	4.10606e-24	1.25132e-22	0.0370959
ENSG00000176108	CHMP6	0.823252	4.47803e-24	1.3624e-22	0.0822633
ENSG00000106355	LSM5	-0.637992	4.53813e-24	1.37838e-22	0.0635797
ENSG00000073536	NLE1	-1.46504	4.61175e-24	1.39841e-22	0.147126
ENSG00000173889	PHC3	-0.825767	4.93471e-24	1.49386e-22	0.0819689
ENSG00000198000	NOL8	-0.692009	4.9714e-24	1.50247e-22	0.0692572
ENSG00000085224	ATRX	-0.613358	5.3549e-24	1.61569e-22	0.0609181
ENSG00000164985	PSIP1	-1.22013	5.87532e-24	1.76978e-22	0.122704
ENSG00000157184	CPT2	0.588238	6.111e-24	1.83774e-22	0.0586828
ENSG00000128050	PAICS	-0.942811	6.20069e-24	1.86164e-22	0.0950371
ENSG00000232119	MCTS1	-0.632636	6.31313e-24	1.89228e-22	0.0631276
ENSG00000132676	DAP3	-0.383932	6.62084e-24	1.98125e-22	0.0381893
ENSG00000103326	CAPN15	1.50756	6.83234e-24	2.04119e-22	0.152725
ENSG00000184220	CMSS1	-1.45354	7.18622e-24	2.1434e-22	0.146884
ENSG00000172766	NAA16	-0.998682	7.51751e-24	2.23855e-22	0.100498
ENSG00000185347	TEDC1	1.14544	7.65759e-24	2.27654e-22	0.115408
ENSG00000162889	MAPKAPK2	0.873882	7.9213e-24	2.35111e-22	0.0870912
ENSG00000079313	REXO1	0.930967	8.32192e-24	2.46599e-22	0.0934437
ENSG00000197056	ZMYM1	-0.699046	8.84583e-24	2.61699e-22	0.0702322
ENSG00000106028	SSBP1	-0.546584	9.23899e-24	2.72887e-22	0.0547283
ENSG00000081059	TCF7	-1.927	9.33525e-24	2.75284e-22	0.195642
ENSG00000105397	TYK2	0.776642	9.56727e-24	2.8167e-22	0.0779087
ENSG00000198252	STYX	-0.678397	9.65706e-24	2.83855e-22	0.068158
ENSG00000102119	EMD	0.401847	9.96413e-24	2.92409e-22	0.0400488
ENSG00000124275	MTRR	-0.571307	1.10969e-23	3.25129e-22	0.0573639
ENSG00000090686	USP48	-0.465381	1.15507e-23	3.37882e-22	0.0465542
ENSG00000198755	RPL10A	-1.13737	1.17693e-23	3.43723e-22	0.116325
ENSG00000198625	MDM4	-0.667241	1.22239e-23	3.5643e-22	0.066938
ENSG00000198301	SDAD1	-0.730477	1.23343e-23	3.59074e-22	0.0737741
ENSG00000149970	CNKSR2	-3.35742	1.34618e-23	3.91272e-22	0.343961
ENSG00000167637	ZNF283	-0.674465	1.38126e-23	4.0083e-22	0.0677931
ENSG00000204103	MAFB	1.96463	1.39971e-23	4.05538e-22	0.203326
ENSG00000137409	MTCH1	0.496591	1.42939e-23	4.1348e-22	0.0498297
ENSG00000166432	ZMAT1	-0.999198	1.46423e-23	4.22886e-22	0.100962
ENSG00000104660	LEPROTL1	-0.967601	1.48779e-23	4.2901e-22	0.0980886
ENSG00000118181	RPS25	-1.08833	1.65273e-23	4.75818e-22	0.111718
ENSG00000100982	PCIF1	0.459207	1.65659e-23	4.76179e-22	0.0460674
ENSG00000114023	FAM162A	-0.676581	1.66008e-23	4.76429e-22	0.0684087
ENSG00000130511	SSBP4	1.83757	1.71409e-23	4.91156e-22	0.192031
ENSG00000008323	PLEKHG6	2.1515	1.71892e-23	4.91769e-22	0.219969
ENSG00000122085	MTERF4	-1.21961	1.82842e-23	5.22274e-22	0.124383
ENSG00000135336	ORC3	-0.528249	1.84291e-23	5.25591e-22	0.0533418
ENSG00000176182	MYPOP	1.30331	1.90264e-23	5.41776e-22	0.132335
ENSG00000102241	HTATSF1	-0.446398	2.11541e-23	6.01425e-22	0.0449467
ENSG00000105926	PALS2	-1.57464	2.12517e-23	6.03257e-22	0.161377
ENSG00000117543	DPH5	-1.72696	2.14776e-23	6.08721e-22	0.177778
ENSG00000251369	ZNF550	-1.10865	2.48637e-23	7.03595e-22	0.113003
ENSG00000197136	PCNX3	0.759972	2.50681e-23	7.0828e-22	0.0764884
ENSG00000099785	MARCHF2	1.10094	2.65132e-23	7.47951e-22	0.111943
ENSG00000164649	CDCA7L	-2.29601	2.70733e-23	7.6257e-22	0.235877
ENSG00000106003	LFNG	1.23702	2.75977e-23	7.76142e-22	0.126609
ENSG00000125354	SEPTIN6	-1.27417	2.84728e-23	7.9952e-22	0.129476
ENSG00000081307	UBA5	-0.458349	2.93504e-23	8.22895e-22	0.0462712
ENSG00000143774	GUK1	0.841629	3.06184e-23	8.57128e-22	0.085849
ENSG00000164815	ORC5	-0.791139	3.07983e-23	8.6084e-22	0.0805405
ENSG00000197892	KIF13B	0.601578	3.20939e-23	8.9568e-22	0.0611736
ENSG00000126749	EMG1	-0.880212	3.32965e-23	9.27822e-22	0.0904891
ENSG00000140829	DHX38	0.401904	3.43715e-23	9.56316e-22	0.0406846
ENSG00000243943	ZNF512	-0.730023	3.45772e-23	9.60573e-22	0.074224
ENSG00000138078	PREPL	-0.620576	3.56873e-23	9.89902e-22	0.0628771
ENSG00000180834	MAP6D1	2.63947	3.68211e-23	1.0198e-21	0.271854
ENSG00000167680	SEMA6B	2.93957	3.72979e-23	1.03144e-21	0.303756
ENSG00000059588	TARBP1	-1.15864	3.88253e-23	1.07205e-21	0.118702
ENSG00000099860	GADD45B	1.4878	4.12579e-23	1.13749e-21	0.153633
ENSG00000166004	CEP295	-0.942891	4.20569e-23	1.15777e-21	0.0961644
ENSG00000127452	FBXL12	0.631738	4.27222e-23	1.17431e-21	0.0642083
ENSG00000152256	PDK1	-1.62926	4.35064e-23	1.19407e-21	0.167983
ENSG00000135945	REV1	-0.424385	4.39364e-23	1.20405e-21	0.0430438
ENSG00000165392	WRN	-1.03792	4.57233e-23	1.25114e-21	0.106445
ENSG00000113712	CSNK1A1	0.586965	4.80479e-23	1.31278e-21	0.0597099
ENSG00000177374	HIC1	2.77773	4.83049e-23	1.31783e-21	0.28795
ENSG00000197841	ZNF181	-1.14754	4.8691e-23	1.32638e-21	0.117604
ENSG00000170854	RIOX2	-1.05105	5.06541e-23	1.37779e-21	0.1078
ENSG00000128000	ZNF780B	-1.01412	5.24874e-23	1.42553e-21	0.104238
ENSG00000129317	PUS7L	-0.665313	5.3282e-23	1.44496e-21	0.0680112
ENSG00000090060	PAPOLA	-0.375223	5.39928e-23	1.45989e-21	0.0374162
ENSG00000108443	RPS6KB1	-0.610206	5.39436e-23	1.45989e-21	0.0620974
ENSG00000171206	TRIM8	0.990554	5.60929e-23	1.51443e-21	0.102592
ENSG00000196440	ARMCX4	-0.863066	5.80964e-23	1.5662e-21	0.0881704
ENSG00000171443	ZNF524	1.42763	5.90724e-23	1.59016e-21	0.150213
ENSG00000189077	TMEM120A	0.952461	6.19846e-23	1.66609e-21	0.0981481
ENSG00000080603	SRCAP	0.983098	7.31947e-23	1.96451e-21	0.100981
ENSG00000100711	ZFYVE21	0.904829	7.45491e-23	1.99792e-21	0.0938785
ENSG00000089682	RBM41	-0.789529	9.15582e-23	2.45016e-21	0.0810202
ENSG00000172531	PPP1CA	0.608511	9.299e-23	2.48482e-21	0.062687
ENSG00000174444	RPL4	-1.27491	1.00694e-22	2.68675e-21	0.133139
ENSG00000184232	OAF	1.64177	1.01159e-22	2.6952e-21	0.171868
ENSG00000112200	ZNF451	-0.698436	1.01475e-22	2.69969e-21	0.0715747
ENSG00000095002	MSH2	-0.965487	1.07906e-22	2.86659e-21	0.100287
ENSG00000164134	NAA15	-0.680012	1.09203e-22	2.89681e-21	0.0701013
ENSG00000115816	CEBPZ	-0.699517	1.12713e-22	2.9856e-21	0.0720405
ENSG00000070476	ZXDC	0.427617	1.21709e-22	3.21918e-21	0.0437499
ENSG00000244754	N4BP2L2	-0.532272	1.2531e-22	3.30962e-21	0.0547732
ENSG00000152795	HNRNPDL	-0.475311	1.26006e-22	3.32321e-21	0.047392
ENSG00000163312	HELQ	-0.720544	1.26429e-22	3.32954e-21	0.074205
ENSG00000197063	MAFG	1.24852	1.28799e-22	3.38707e-21	0.129207
ENSG00000111196	MAGOHB	-0.765962	1.29189e-22	3.39241e-21	0.0787725
ENSG00000165886	UBTD1	1.8823	1.35864e-22	3.56258e-21	0.19851
ENSG00000152270	PDE3B	-1.4649	1.39057e-22	3.64105e-21	0.152462
ENSG00000141971	MVB12A	0.994041	1.42105e-22	3.71554e-21	0.103762
ENSG00000105520	PLPPR2	1.37012	1.42694e-22	3.72559e-21	0.143994
ENSG00000007376	RPUSD1	1.22408	1.44738e-22	3.77354e-21	0.12828
ENSG00000198355	PIM3	1.68109	1.45196e-22	3.78006e-21	0.175274
ENSG00000164074	ABHD18	-0.4423	1.49914e-22	3.89734e-21	0.0453914
ENSG00000138867	GUCD1	0.624533	1.55743e-22	4.0431e-21	0.0643315
ENSG00000125966	MMP24	0.92562	1.64974e-22	4.27057e-21	0.0957901
ENSG00000198932	GPRASP1	-2.14052	1.64759e-22	4.27057e-21	0.225215
ENSG00000089009	RPL6	-0.841926	1.65573e-22	4.28e-21	0.0875708
ENSG00000142534	RPS11	-0.96792	1.67495e-22	4.32354e-21	0.100666
ENSG00000171960	PPIH	-0.541977	1.71866e-22	4.4301e-21	0.0557698
ENSG00000186577	SMIM29	1.1309	1.73644e-22	4.46961e-21	0.118834
ENSG00000144645	OSBPL10	-2.65363	1.7429e-22	4.47991e-21	0.280737
ENSG00000153015	CWC27	-0.570881	1.85905e-22	4.77174e-21	0.058926
ENSG00000215375	MYL5	1.23599	1.86765e-22	4.78708e-21	0.12918
ENSG00000089022	MAPKAPK5	-0.562359	1.88065e-22	4.81361e-21	0.058031
ENSG00000100316	RPL3	-1.16777	1.92767e-22	4.92704e-21	0.122596
ENSG00000124574	ABCC10	0.624926	1.94053e-22	4.95298e-21	0.0650571
ENSG00000086712	TXLNG	-1.03084	1.94823e-22	4.96477e-21	0.107383
ENSG00000112305	SMAP1	0.81688	1.9506e-22	4.96477e-21	0.0846496
ENSG00000100300	TSPO	2.00163	2.02005e-22	5.13436e-21	0.213719
ENSG00000168350	DEGS2	1.91645	2.14694e-22	5.44927e-21	0.201399
ENSG00000182858	ALG12	0.584238	2.33932e-22	5.92933e-21	0.0606119
ENSG00000162086	ZNF75A	-0.612375	2.34416e-22	5.93333e-21	0.0630429
ENSG00000092929	UNC13D	0.972744	2.37125e-22	5.99358e-21	0.101285
ENSG00000136824	SMC2	-0.705553	2.46109e-22	6.21202e-21	0.073259
ENSG00000184515	BEX5	-2.47224	2.53921e-22	6.40034e-21	0.262189
ENSG00000108669	CYTH1	0.448786	2.68265e-22	6.75256e-21	0.0461765
ENSG00000132432	SEC61G	1.03764	2.76772e-22	6.95709e-21	0.10782
ENSG00000120802	TMPO	-1.31507	2.84229e-22	7.13469e-21	0.137619
ENSG00000141867	BRD4	0.604879	2.96673e-22	7.43682e-21	0.0630735
ENSG00000205138	SDHAF1	0.776538	3.01216e-22	7.54033e-21	0.0809625
ENSG00000127328	RAB3IP	-1.25183	3.01642e-22	7.54064e-21	0.130896
ENSG00000127616	SMARCA4	0.549596	3.11893e-22	7.78622e-21	0.0569571
ENSG00000148411	NACC2	1.28523	3.23687e-22	8.06958e-21	0.135054
ENSG00000131876	SNRPA1	-0.815941	3.55697e-22	8.8555e-21	0.0849766
ENSG00000140553	UNC45A	0.494046	3.78777e-22	9.41723e-21	0.0513547
ENSG00000103111	MON1B	0.457823	4.24533e-22	1.05405e-20	0.0474151
ENSG00000188177	ZC3H6	-1.01891	4.68008e-22	1.1604e-20	0.107061
ENSG00000166012	TAF1D	-0.753479	4.72611e-22	1.16998e-20	0.0785638
ENSG00000177076	ACER2	-1.24147	4.73155e-22	1.16998e-20	0.130437
ENSG00000174775	HRAS	0.840733	4.80569e-22	1.18671e-20	0.0888073
ENSG00000111581	NUP107	-0.579295	4.84154e-22	1.19394e-20	0.0602985
ENSG00000032444	PNPLA6	1.08245	4.88585e-22	1.20324e-20	0.114332
ENSG00000125505	MBOAT7	1.4309	4.92483e-22	1.2112e-20	0.150567
ENSG00000010256	UQCRC1	0.936671	5.01217e-22	1.2304e-20	0.0992177
ENSG00000144713	RPL32	-1.30043	5.01641e-22	1.2304e-20	0.137763
ENSG00000033170	FUT8	-1.00721	5.22537e-22	1.27994e-20	0.106322
ENSG00000151779	NBAS	-0.437544	5.43729e-22	1.33006e-20	0.0454723
ENSG00000117859	OSBPL9	-0.551547	5.44787e-22	1.33086e-20	0.0575972
ENSG00000129167	TPH1	-1.45831	5.62504e-22	1.3723e-20	0.153929
ENSG00000157873	TNFRSF14	1.12503	5.6894e-22	1.38615e-20	0.120433
ENSG00000165494	PCF11	-0.354861	5.90264e-22	1.43618e-20	0.0366307
ENSG00000138430	OLA1	-0.576225	6.60442e-22	1.60478e-20	0.0603695
ENSG00000164347	GFM2	-0.416038	6.78668e-22	1.64688e-20	0.043224
ENSG00000176170	SPHK1	2.58075	7.157e-22	1.73443e-20	0.274687
ENSG00000126970	ZC4H2	-1.32275	7.20031e-22	1.74261e-20	0.139857
ENSG00000173327	MAP3K11	1.21322	7.50717e-22	1.81446e-20	0.128964
ENSG00000135723	FHOD1	1.08924	8.16747e-22	1.97144e-20	0.11562
ENSG00000197766	CFD	3.59051	8.36985e-22	2.01762e-20	0.411015
ENSG00000266338	NBPF15	-1.85691	8.52307e-22	2.05184e-20	0.199069
ENSG00000173442	EHBP1L1	1.1315	8.57291e-22	2.06112e-20	0.120162
ENSG00000112118	MCM3	-0.793822	8.83242e-22	2.12071e-20	0.0835491
ENSG00000153140	CETN3	-0.921214	8.85589e-22	2.12355e-20	0.0972736
ENSG00000087263	OGFOD1	-0.482588	9.0545e-22	2.16832e-20	0.0507072
ENSG00000148303	RPL7A	-0.898304	9.12692e-22	2.18279e-20	0.0960909
ENSG00000029363	BCLAF1	-0.735186	9.65657e-22	2.30644e-20	0.0771314
ENSG00000054611	TBC1D22A	0.661017	9.76126e-22	2.32839e-20	0.0699475
ENSG00000104960	PTOV1	0.662757	9.81234e-22	2.33752e-20	0.0698982
ENSG00000136463	TACO1	1.19106	9.92885e-22	2.36219e-20	0.12626
ENSG00000099810	MTAP	-1.31179	1.04741e-21	2.48867e-20	0.140792
ENSG00000142065	ZFP14	-0.869089	1.06146e-21	2.51876e-20	0.0919422
ENSG00000130520	LSM4	0.546745	1.06913e-21	2.53365e-20	0.0576324
ENSG00000100036	SLC35E4	1.82003	1.07801e-21	2.55138e-20	0.19459
ENSG00000142002	DPP9	0.705623	1.08345e-21	2.56093e-20	0.0746642
ENSG00000130733	YIPF2	0.964393	1.0993e-21	2.59502e-20	0.102265
ENSG00000112237	CCNC	-0.6273	1.12724e-21	2.65754e-20	0.0662775
ENSG00000198730	CTR9	-0.328285	1.17329e-21	2.76254e-20	0.0343578
ENSG00000171863	RPS7	-1.0751	1.22628e-21	2.88358e-20	0.114575
ENSG00000257315	ZBED6	1.79167	1.31295e-21	3.08341e-20	0.19149
ENSG00000197858	GPAA1	1.14931	1.40786e-21	3.30204e-20	0.123226
ENSG00000163001	CFAP36	-1.02635	1.42916e-21	3.3477e-20	0.108885
ENSG00000171169	NAIF1	0.538728	1.49372e-21	3.49442e-20	0.0568172
ENSG00000101126	ADNP	-0.498347	1.51869e-21	3.54829e-20	0.052322
ENSG00000136111	TBC1D4	-1.59114	1.63265e-21	3.80965e-20	0.171379
ENSG00000089289	IGBP1	-0.481135	1.64004e-21	3.822e-20	0.0508564
ENSG00000090432	MUL1	0.601662	1.67929e-21	3.90848e-20	0.0634984
ENSG00000185272	RBM11	-2.56101	1.69728e-21	3.94532e-20	0.275668
ENSG00000172915	NBEA	-2.14466	1.72163e-21	3.99681e-20	0.232323
ENSG00000111652	COPS7A	0.607499	1.73064e-21	4.01262e-20	0.0644755
ENSG00000089693	MLF2	0.457462	1.78962e-21	4.1441e-20	0.0482596
ENSG00000063244	U2AF2	0.53786	1.82435e-21	4.21915e-20	0.0569942
ENSG00000175221	MED16	1.05501	1.92821e-21	4.4537e-20	0.112602
ENSG00000137955	RABGGTB	-0.625783	1.96966e-21	4.54368e-20	0.0662706
ENSG00000118046	STK11	0.93994	2.06913e-21	4.76712e-20	0.100856
ENSG00000167325	RRM1	-0.662252	2.08421e-21	4.79579e-20	0.0701377
ENSG00000188868	ZNF563	-1.32518	2.11387e-21	4.8579e-20	0.14195
ENSG00000167642	SPINT2	1.71802	2.16729e-21	4.97439e-20	0.187204
ENSG00000065150	IPO5	-0.67894	2.2024e-21	5.04862e-20	0.0719966
ENSG00000175182	FAM131A	0.978289	2.21347e-21	5.06763e-20	0.104281
ENSG00000103197	TSC2	0.671946	2.21965e-21	5.06905e-20	0.0715578
ENSG00000156697	UTP14A	-0.666789	2.21817e-21	5.06905e-20	0.0708362
ENSG00000177731	FLII	0.859315	2.29092e-21	5.22525e-20	0.092013
ENSG00000166987	MBD6	0.978839	2.30565e-21	5.25227e-20	0.105962
ENSG00000146757	ZNF92	-0.794164	2.33208e-21	5.30584e-20	0.0842829
ENSG00000119787	ATL2	-0.532102	2.3478e-21	5.33496e-20	0.0563344
ENSG00000182327	GLTPD2	3.19615	2.35929e-21	5.35438e-20	0.345949
ENSG00000078142	PIK3C3	-0.452263	2.40274e-21	5.44621e-20	0.0477827
ENSG00000261408	TEN1-CDK3	1.25423	2.42364e-21	5.48676e-20	0.135092
ENSG00000258728		-1.39317	2.54348e-21	5.75092e-20	0.149974
ENSG00000102053	ZC3H12B	-1.44243	2.65889e-21	6.00441e-20	0.15503
ENSG00000107140	TESK1	1.26793	2.7006e-21	6.09105e-20	0.136902
ENSG00000206530	CFAP44	-1.21668	2.76832e-21	6.23609e-20	0.130674
ENSG00000122435	TRMT13	-0.931547	2.8366e-21	6.38201e-20	0.0995088
ENSG00000198919	DZIP3	-1.25576	2.86706e-21	6.44257e-20	0.135074
ENSG00000164828	SUN1	-0.891862	3.15105e-21	7.07201e-20	0.0955394
ENSG00000142347	MYO1F	0.974324	3.3429e-21	7.49337e-20	0.105948
ENSG00000186564	FOXD2	1.67122	3.40616e-21	7.62577e-20	0.180915
ENSG00000127666	TICAM1	1.40086	3.67226e-21	8.21145e-20	0.151937
ENSG00000154146	NRGN	2.62093	3.99385e-21	8.91959e-20	0.285027
ENSG00000168061	SAC3D1	1.15607	4.02324e-21	8.97424e-20	0.1252
ENSG00000196504	PRPF40A	-0.376595	4.08897e-21	9.10971e-20	0.0399019
ENSG00000157637	SLC38A10	0.957508	4.14816e-21	9.2303e-20	0.103939
ENSG00000273611	ZNHIT3	-0.581967	4.34839e-21	9.66404e-20	0.062421
ENSG00000130935	NOL11	-0.765052	4.47757e-21	9.93899e-20	0.0819766
ENSG00000111142	METAP2	-0.472974	4.48488e-21	9.94312e-20	0.0505035
ENSG00000102763	VWA8	-0.976281	4.83686e-21	1.07104e-19	0.105042
ENSG00000072786	STK10	0.547333	4.85819e-21	1.07446e-19	0.0590925
ENSG00000233276	GPX1	2.53092	4.99743e-21	1.10392e-19	0.287678
ENSG00000159445	THEM4	-1.97472	5.02548e-21	1.10877e-19	0.215851
ENSG00000121892	PDS5A	-0.41632	5.11937e-21	1.12812e-19	0.0444046
ENSG00000104177	MYEF2	-1.53591	5.57529e-21	1.22415e-19	0.166856
ENSG00000107890	ANKRD26	-0.930212	5.57136e-21	1.22415e-19	0.100054
ENSG00000172954	LCLAT1	-1.48036	5.56728e-21	1.22415e-19	0.160901
ENSG00000123200	ZC3H13	-0.461415	5.60981e-21	1.23024e-19	0.0493162
ENSG00000081721	DUSP12	-0.598283	5.64289e-21	1.23453e-19	0.0641526
ENSG00000123353	ORMDL2	0.947389	5.64106e-21	1.23453e-19	0.102261
ENSG00000073169	SELENOO	1.05224	5.67827e-21	1.24078e-19	0.114103
ENSG00000178404	CEP295NL	2.2264	5.8615e-21	1.27928e-19	0.245266
ENSG00000133250	ZNF414	1.16746	6.03725e-21	1.31606e-19	0.126802
ENSG00000236287	ZBED5	-0.361698	6.30106e-21	1.37193e-19	0.0385273
ENSG00000090581	GNPTG	1.15297	6.84751e-21	1.48913e-19	0.126029
ENSG00000164068	RNF123	0.589886	7.00456e-21	1.52147e-19	0.0632796
ENSG00000116120	FARSB	-1.18006	7.01933e-21	1.52286e-19	0.128578
ENSG00000155508	CNOT8	-0.509969	7.04462e-21	1.52653e-19	0.054881
ENSG00000083720	OXCT1	-1.22056	7.09646e-21	1.53594e-19	0.132511
ENSG00000164022	AIMP1	-0.561206	7.41063e-21	1.60203e-19	0.0603319
ENSG00000119596	YLPM1	-0.540744	7.78017e-21	1.67993e-19	0.0580253
ENSG00000111057	KRT18	-3.04791	8.18547e-21	1.76535e-19	0.332939
ENSG00000117602	RCAN3	-1.65555	8.44711e-21	1.81962e-19	0.180811
ENSG00000158828	PINK1	1.06269	8.58194e-21	1.84648e-19	0.116128
ENSG00000075711	DLG1	-0.567898	8.8893e-21	1.91036e-19	0.0609535
ENSG00000091490	SEL1L3	-1.11633	9.01849e-21	1.93584e-19	0.121843
ENSG00000182979	MTA1	0.794821	9.05953e-21	1.94236e-19	0.0857605
ENSG00000140718	FTO	-0.512552	9.09844e-21	1.94841e-19	0.0551423
ENSG00000196458	ZNF605	-1.07936	9.19811e-21	1.96745e-19	0.117665
ENSG00000147874	HAUS6	-0.682457	9.20928e-21	1.96753e-19	0.0735873
ENSG00000011523	CEP68	-0.772343	9.3632e-21	1.99807e-19	0.0834834
ENSG00000171490	RSL1D1	-0.732238	9.61246e-21	2.04886e-19	0.0796632
ENSG00000164024	METAP1	-0.671933	9.65572e-21	2.05567e-19	0.0727017
ENSG00000185189	NRBP2	0.773109	9.72923e-21	2.06891e-19	0.0841541
ENSG00000196177	ACADSB	-0.980955	9.99581e-21	2.12312e-19	0.106332
ENSG00000169093	ASMTL	0.81895	1.00875e-20	2.14009e-19	0.0890611
ENSG00000117133	RPF1	-0.520752	1.03449e-20	2.19215e-19	0.0564604
ENSG00000161999	JMJD8	1.01213	1.09694e-20	2.3218e-19	0.111088
ENSG00000131408	NR1H2	0.963378	1.14005e-20	2.41023e-19	0.105119
ENSG00000127080	IPPK	0.903121	1.14845e-20	2.42519e-19	0.0983225
ENSG00000131446	MGAT1	1.33918	1.15091e-20	2.42757e-19	0.148131
ENSG00000115827	DCAF17	-0.628584	1.15534e-20	2.4341e-19	0.0681306
ENSG00000012232	EXTL3	0.580589	1.19434e-20	2.51335e-19	0.0626325
ENSG00000179526	SHARPIN	0.785598	1.23153e-20	2.58862e-19	0.0857327
ENSG00000153064	BANK1	-2.64659	1.23435e-20	2.59157e-19	0.291657
ENSG00000116032	GRIN3B	2.14264	1.2808e-20	2.686e-19	0.242381
ENSG00000135637	CCDC142	0.583451	1.30115e-20	2.72553e-19	0.0629705
ENSG00000080561	MID2	-2.08837	1.31497e-20	2.75133e-19	0.231088
ENSG00000130669	PAK4	1.39616	1.33599e-20	2.79209e-19	0.152823
ENSG00000216490	IFI30	1.74564	1.34537e-20	2.80847e-19	0.195188
ENSG00000104613	INTS10	-0.645915	1.35582e-20	2.82705e-19	0.0703052
ENSG00000060339	CCAR1	-0.444247	1.36401e-20	2.84089e-19	0.0477835
ENSG00000100612	DHRS7	0.742812	1.42974e-20	2.97438e-19	0.0809067
ENSG00000104973	MED25	1.09722	1.45812e-20	3.02995e-19	0.120011
ENSG00000172530	BANP	1.25354	1.48033e-20	3.07262e-19	0.136725
ENSG00000136518	ACTL6A	-0.53853	1.50673e-20	3.12385e-19	0.0584882
ENSG00000089157	RPLP0	-1.06512	1.55251e-20	3.21511e-19	0.117333
ENSG00000178425	NT5DC1	-0.960259	1.57968e-20	3.26766e-19	0.104755
ENSG00000162104	ADCY9	0.862547	1.60116e-20	3.30834e-19	0.0939829
ENSG00000130741	EIF2S3	-0.368999	1.61029e-20	3.32344e-19	0.0396677
ENSG00000160325	CACFD1	0.880611	1.84031e-20	3.79386e-19	0.096163
ENSG00000109452	INPP4B	-2.59364	1.88768e-20	3.88713e-19	0.287754
ENSG00000123106	CCDC91	-0.555894	1.89936e-20	3.90677e-19	0.0602983
ENSG00000110446	SLC15A3	1.7273	1.92355e-20	3.95206e-19	0.191779
ENSG00000278845	MRPL45	-0.708565	1.94868e-20	3.99919e-19	0.0772181
ENSG00000169031	COL4A3	-2.75387	2.07372e-20	4.25101e-19	0.31019
ENSG00000168591	TMUB2	0.486481	2.21603e-20	4.53763e-19	0.0530379
ENSG00000119969	HELLS	-1.47738	2.25518e-20	4.61262e-19	0.163996
ENSG00000205903	ZNF316	0.931482	2.30901e-20	4.71741e-19	0.102915
ENSG00000179085	DPM3	1.44422	2.57285e-20	5.25058e-19	0.162675
ENSG00000142444	TIMM29	0.670386	2.6606e-20	5.42359e-19	0.0734998
ENSG00000187522	HSPA14	-0.594172	2.70606e-20	5.51009e-19	0.0648528
ENSG00000275183	LENG9	1.74465	2.76947e-20	5.63291e-19	0.195972
ENSG00000128513	POT1	-0.67411	2.85049e-20	5.79124e-19	0.0736402
ENSG00000253729	PRKDC	-0.612683	2.94178e-20	5.97004e-19	0.0663129
ENSG00000147224	PRPS1	-0.744552	2.95744e-20	5.99514e-19	0.0813962
ENSG00000125691	RPL23	-0.808821	3.08278e-20	6.24228e-19	0.0895626
ENSG00000174943	KCTD13	0.534798	3.09441e-20	6.25888e-19	0.0584057
ENSG00000054967	RELT	1.48311	3.23122e-20	6.52835e-19	0.165422
ENSG00000055070	SZRD1	0.596257	3.2527e-20	6.56447e-19	0.0649963
ENSG00000156603	MED19	0.866965	3.26499e-20	6.58199e-19	0.0954993
ENSG00000114021	NIT2	-0.629666	3.27615e-20	6.5972e-19	0.0688153
ENSG00000069275	NUCKS1	-0.502416	3.28673e-20	6.61118e-19	0.0551239
ENSG00000173545	ZNF622	0.701747	3.31025e-20	6.65115e-19	0.0776237
ENSG00000185236	RAB11B	0.959735	3.55632e-20	7.13771e-19	0.106093
ENSG00000126012	KDM5C	0.437934	3.574e-20	7.1653e-19	0.0476689
ENSG00000166484	MAPK7	0.736718	3.65726e-20	7.32417e-19	0.0811079
ENSG00000120837	NFYB	-0.707505	3.70099e-20	7.40361e-19	0.0776394
ENSG00000145425	RPS3A	-1.46663	3.74405e-20	7.48154e-19	0.164291
ENSG00000125485	DDX31	-0.988008	3.75145e-20	7.48811e-19	0.109738
ENSG00000167770	OTUB1	0.524542	3.94858e-20	7.87297e-19	0.056713
ENSG00000105355	PLIN3	1.23556	4.04151e-20	8.04067e-19	0.13707
ENSG00000112294	ALDH5A1	-1.46576	4.03779e-20	8.04067e-19	0.163164
ENSG00000133131	MORC4	-1.54995	4.08555e-20	8.11942e-19	0.172555
ENSG00000186265	BTLA	-2.28294	4.25962e-20	8.45613e-19	0.255275
ENSG00000163682	RPL9	-1.37709	4.29205e-20	8.51124e-19	0.153403
ENSG00000136891	TEX10	-0.706951	4.30856e-20	8.53469e-19	0.077595
ENSG00000103152	MPG	0.998364	4.44496e-20	8.79532e-19	0.111027
ENSG00000247596	TWF2	1.07988	4.47755e-20	8.8502e-19	0.12089
ENSG00000176248	ANAPC2	0.606881	4.50435e-20	8.89352e-19	0.0667307
ENSG00000114626	ABTB1	0.796132	4.86906e-20	9.60322e-19	0.0878404
ENSG00000100490	CDKL1	-0.769106	4.91461e-20	9.68258e-19	0.0847994
ENSG00000182150	ERCC6L2	-0.796349	4.92862e-20	9.69969e-19	0.0875722
ENSG00000197050	ZNF420	-1.16125	4.97511e-20	9.78063e-19	0.12923
ENSG00000174292	TNK1	-2.05249	5.33407e-20	1.0475e-18	0.230802
ENSG00000124374	PAIP2B	-1.52108	5.474e-20	1.07379e-18	0.16937
ENSG00000185760	KCNQ5	-1.96499	5.47974e-20	1.07379e-18	0.220576
ENSG00000276819	TRBV15	-2.41704	5.58265e-20	1.09278e-18	0.271238
ENSG00000141012	GALNS	0.862989	5.68248e-20	1.11113e-18	0.0945157
ENSG00000111530	CAND1	-0.405898	5.70422e-20	1.11419e-18	0.0446846
ENSG00000167671	UBXN6	0.908267	5.75803e-20	1.12349e-18	0.100667
ENSG00000011258	MBTD1	-0.599763	5.90315e-20	1.15058e-18	0.0659954
ENSG00000198464	ZNF480	-0.749112	5.93996e-20	1.15652e-18	0.0828044
ENSG00000100263	RHBDD3	1.17939	5.97829e-20	1.16274e-18	0.132752
ENSG00000133612	AGAP3	1.60348	6.51353e-20	1.26549e-18	0.181599
ENSG00000099999	RNF215	0.833436	6.89899e-20	1.33895e-18	0.0924026
ENSG00000137502	RAB30	-1.48444	7.05314e-20	1.36741e-18	0.166093
ENSG00000140691	ARMC5	1.02887	7.37563e-20	1.42841e-18	0.115261
ENSG00000080839	RBL1	-0.85197	7.42986e-20	1.43739e-18	0.0942545
ENSG00000231500	RPS18	-1.38793	7.4655e-20	1.44275e-18	0.155349
ENSG00000052723	SIKE1	-0.550015	7.79196e-20	1.50425e-18	0.06053
ENSG00000198042	MAK16	-0.89374	8.2086e-20	1.583e-18	0.0995558
ENSG00000076043	REXO2	-1.2526	8.37301e-20	1.613e-18	0.141016
ENSG00000171566	PLRG1	-0.348082	8.5987e-20	1.65473e-18	0.0383123
ENSG00000160999	SH2B2	1.58676	8.66019e-20	1.6648e-18	0.178584
ENSG00000155034	FBXL18	1.03471	8.67305e-20	1.66552e-18	0.116314
ENSG00000149782	PLCB3	1.2297	9.0427e-20	1.73467e-18	0.139667
ENSG00000105401	CDC37	0.554265	9.11459e-20	1.74663e-18	0.062844
ENSG00000118804	STBD1	2.46437	9.25853e-20	1.77235e-18	0.279825
ENSG00000118689	FOXO3	1.14211	9.31786e-20	1.78183e-18	0.127843
ENSG00000086504	MRPL28	0.731521	9.61256e-20	1.83434e-18	0.0814411
ENSG00000198056	PRIM1	-1.67532	9.60306e-20	1.83434e-18	0.188141
ENSG00000129925	PGAP6	1.18576	9.67159e-20	1.84367e-18	0.1325
ENSG00000162302	RPS6KA4	1.16484	1.01646e-19	1.93562e-18	0.132113
ENSG00000165458	INPPL1	0.767249	1.03367e-19	1.96635e-18	0.0855755
ENSG00000105656	ELL	1.20282	1.0734e-19	2.0398e-18	0.134931
ENSG00000168944	CEP120	-0.979583	1.09592e-19	2.08041e-18	0.109342
ENSG00000185811	IKZF1	-0.841601	1.12735e-19	2.13786e-18	0.0939428
ENSG00000103653	CSK	0.891927	1.14768e-19	2.17414e-18	0.100065
ENSG00000102738	MRPS31	-0.736419	1.1593e-19	2.19389e-18	0.0820953
ENSG00000164163	ABCE1	-0.800734	1.24141e-19	2.34683e-18	0.0898657
ENSG00000021776	AQR	-0.448371	1.31623e-19	2.48569e-18	0.0495571
ENSG00000198198	SZT2	0.447282	1.31774e-19	2.48598e-18	0.049382
ENSG00000101901	ALG13	-0.602223	1.32201e-19	2.49145e-18	0.0669514
ENSG00000132128	LRRC41	0.36016	1.33086e-19	2.50305e-18	0.039859
ENSG00000211745	TRBV4-2	-2.6622	1.33091e-19	2.50305e-18	0.305318
ENSG00000101882	NKAP	-0.603977	1.34994e-19	2.53621e-18	0.0671231
ENSG00000132017	DCAF15	0.704224	1.36441e-19	2.56077e-18	0.0786642
ENSG00000116786	PLEKHM2	1.30107	1.44358e-19	2.70378e-18	0.147954
ENSG00000160124	MIX23	-1.30845	1.44353e-19	2.70378e-18	0.148367
ENSG00000196646	ZNF136	-0.709044	1.48448e-19	2.77754e-18	0.0789244
ENSG00000205250	E2F4	0.504319	1.5537e-19	2.90407e-18	0.0560825
ENSG00000134590	RTL8C	0.928096	1.63492e-19	3.05275e-18	0.10498
ENSG00000147364	FBXO25	-0.595342	1.74041e-19	3.24638e-18	0.0663023
ENSG00000088247	KHSRP	0.581878	1.7753e-19	3.30808e-18	0.0650665
ENSG00000149091	DGKZ	0.993677	1.82738e-19	3.40165e-18	0.112501
ENSG00000203326	ZNF525	-0.828245	1.8809e-19	3.4977e-18	0.0927602
ENSG00000105176	URI1	-0.84108	1.92598e-19	3.57789e-18	0.0948263
ENSG00000139370	SLC15A4	0.830397	1.93688e-19	3.59448e-18	0.0931787
ENSG00000149930	TAOK2	0.587426	1.94729e-19	3.61011e-18	0.0642738
ENSG00000185950	IRS2	1.42197	1.96077e-19	3.63142e-18	0.160952
ENSG00000069966	GNB5	-1.00965	2.02102e-19	3.73919e-18	0.113229
ENSG00000122490	SLC66A2	1.26312	2.02666e-19	3.74583e-18	0.144106
ENSG00000155561	NUP205	-0.618265	2.07144e-19	3.82472e-18	0.0690174
ENSG00000170142	UBE2E1	0.49606	2.12552e-19	3.92059e-18	0.0554744
ENSG00000173611	SCAI	-1.04977	2.14897e-19	3.95984e-18	0.118886
ENSG00000154743	TSEN2	-1.28543	2.19836e-19	4.04675e-18	0.145642
ENSG00000184207	PGP	0.832416	2.25421e-19	4.14539e-18	0.0941729
ENSG00000188404	SELL	-2.74143	2.26472e-19	4.1605e-18	0.315499
ENSG00000156256	USP16	-0.508309	2.3311e-19	4.27815e-18	0.0564679
ENSG00000198131	ZNF544	-0.974483	2.37064e-19	4.34633e-18	0.110516
ENSG00000108848	LUC7L3	-0.761852	2.37379e-19	4.34773e-18	0.0858647
ENSG00000185112	FAM43A	1.99536	2.41607e-19	4.42074e-18	0.227459
ENSG00000106868	SUSD1	1.07455	2.4327e-19	4.4467e-18	0.121512
ENSG00000152455	SUV39H2	-0.65085	2.46018e-19	4.48792e-18	0.0728949
ENSG00000250479	CHCHD10	1.74799	2.45955e-19	4.48792e-18	0.203729
ENSG00000033122	LRRC7	-1.50798	2.49142e-19	4.53583e-18	0.171125
ENSG00000130706	ADRM1	0.902936	2.49008e-19	4.53583e-18	0.101999
ENSG00000087266	SH3BP2	1.3615	2.54255e-19	4.6243e-18	0.15523
ENSG00000122705	CLTA	1.16328	2.56159e-19	4.65427e-18	0.132822
ENSG00000157077	ZFYVE9	-1.39976	2.67788e-19	4.86072e-18	0.158875
ENSG00000112365	ZBTB24	-0.698783	2.70706e-19	4.90881e-18	0.0784067
ENSG00000119285	HEATR1	-0.861429	2.71135e-19	4.9117e-18	0.0970883
ENSG00000186231	KLHL32	-1.67849	2.83237e-19	5.12584e-18	0.192408
ENSG00000196924	FLNA	1.11307	2.85573e-19	5.16298e-18	0.126352
ENSG00000120526	NUDCD1	-0.906737	2.88838e-19	5.21682e-18	0.102437
ENSG00000182903	ZNF721	-0.861935	3.08003e-19	5.55748e-18	0.0973179
ENSG00000110700	RPS13	-1.03891	3.14717e-19	5.673e-18	0.118959
ENSG00000165995	CACNB2	-0.965127	3.23489e-19	5.82536e-18	0.109473
ENSG00000005238	ATOSB	1.24388	3.26217e-19	5.86289e-18	0.142071
ENSG00000164073	MFSD8	-0.756564	3.25926e-19	5.86289e-18	0.085288
ENSG00000120662	MTRF1	-0.53473	3.35896e-19	6.0309e-18	0.0599889
ENSG00000176788	BASP1	2.03796	3.3874e-19	6.07599e-18	0.236747
ENSG00000167548	KMT2D	0.606132	3.40937e-19	6.10419e-18	0.0698706
ENSG00000188626	GOLGA8M	-2.67775	3.40982e-19	6.10419e-18	0.307641
ENSG00000126062	TMEM115	1.07615	3.46748e-19	6.20132e-18	0.12199
ENSG00000146576	INTS15	0.638287	3.62865e-19	6.48318e-18	0.0719713
ENSG00000133275	CSNK1G2	1.04936	3.64769e-19	6.51082e-18	0.119942
ENSG00000134744	TUT4	-0.815991	3.77496e-19	6.7314e-18	0.0921008
ENSG00000101868	POLA1	-0.563942	3.91336e-19	6.97137e-18	0.0635072
ENSG00000169045	HNRNPH1	-0.580031	3.95242e-19	7.02727e-18	0.0654603
ENSG00000171817	ZNF540	-1.5982	3.95245e-19	7.02727e-18	0.182882
ENSG00000095321	CRAT	0.709192	3.95821e-19	7.03065e-18	0.080183
ENSG00000198792	TMEM184B	0.95252	4.01318e-19	7.12135e-18	0.108473
ENSG00000114391	RPL24	-0.972241	4.07349e-19	7.22133e-18	0.109933
ENSG00000160336	ZNF761	-0.73083	4.52474e-19	8.0135e-18	0.0833983
ENSG00000171700	RGS19	1.35887	4.64584e-19	8.21997e-18	0.158348
ENSG00000127220	ABHD8	1.64601	4.7468e-19	8.39046e-18	0.19112
ENSG00000023516	AKAP11	-0.615048	4.81234e-19	8.49807e-18	0.0697267
ENSG00000103995	CEP152	-0.643128	4.92514e-19	8.68885e-18	0.0725839
ENSG00000173226	IQCB1	-0.610734	5.15432e-19	9.08437e-18	0.0689932
ENSG00000174886	NDUFA11	0.843044	5.19557e-19	9.14821e-18	0.0959391
ENSG00000117983	MUC5B	2.01534	5.46516e-19	9.61362e-18	0.232394
ENSG00000123143	PKN1	0.874363	5.66835e-19	9.96143e-18	0.100116
ENSG00000172270	BSG	0.916486	5.69344e-19	9.99589e-18	0.105722
ENSG00000114098	ARMC8	-0.37402	5.73127e-19	1.00526e-17	0.0421669
ENSG00000138381	ASNSD1	-0.861587	5.75679e-19	1.00877e-17	0.0979361
ENSG00000183734	ASCL2	2.7876	5.8048e-19	1.0162e-17	0.324671
ENSG00000100379	KCTD17	0.866705	5.90952e-19	1.03354e-17	0.0990298
ENSG00000131844	MCCC2	-0.825239	5.94209e-19	1.03735e-17	0.093841
ENSG00000169398	PTK2	-1.58448	5.94268e-19	1.03735e-17	0.182615
ENSG00000058729	RIOK2	-0.641271	6.11927e-19	1.06715e-17	0.0726979
ENSG00000186994	KANK3	2.34593	6.15714e-19	1.07273e-17	0.273306
ENSG00000163029	SMC6	-0.862773	6.31355e-19	1.09893e-17	0.0981651
ENSG00000089639	GMIP	1.0961	6.4035e-19	1.11352e-17	0.126281
ENSG00000151651	ADAM8	1.87958	6.53333e-19	1.13502e-17	0.216933
ENSG00000135486	HNRNPA1	-0.476635	6.73363e-19	1.1687e-17	0.0531482
ENSG00000124222	STX16	-0.573273	6.86351e-19	1.19011e-17	0.0649399
ENSG00000101391	CDK5RAP1	-0.369207	7.00744e-19	1.21391e-17	0.04168
ENSG00000121210	TMEM131L	-1.03242	7.07584e-19	1.2246e-17	0.117839
ENSG00000145592	RPL37	-1.10741	7.11373e-19	1.22999e-17	0.127737
ENSG00000118971	CCND2	-1.26114	7.60755e-19	1.31412e-17	0.145197
ENSG00000136720	HS6ST1	1.40558	8.22753e-19	1.41987e-17	0.162278
ENSG00000168010	ATG16L2	0.809438	8.38944e-19	1.44644e-17	0.0928015
ENSG00000196670	ZFP62	-0.8203	8.50698e-19	1.46532e-17	0.0937246
ENSG00000167302	TEPSIN	0.645594	8.63269e-19	1.48557e-17	0.073767
ENSG00000111716	LDHB	-2.10642	8.65106e-19	1.48733e-17	0.247435
ENSG00000150776	NKAPD1	-0.44004	8.70415e-19	1.49505e-17	0.0497858
ENSG00000165521	EML5	-1.56452	9.03758e-19	1.55086e-17	0.180793
ENSG00000121741	ZMYM2	-0.517945	9.80676e-19	1.68126e-17	0.059195
ENSG00000189057	FAM111B	-2.61973	1.0281e-18	1.76091e-17	0.306557
ENSG00000166971	AKTIP	-1.16458	1.04956e-18	1.79598e-17	0.134453
ENSG00000256223	ZNF10	-1.19656	1.05411e-18	1.80207e-17	0.138081
ENSG00000167613	LAIR1	1.40282	1.07606e-18	1.83787e-17	0.163052
ENSG00000284015	MIR1281	3.98076	1.08925e-18	1.85866e-17	0.458358
ENSG00000196976	LAGE3	1.21332	1.11217e-18	1.896e-17	0.14163
ENSG00000126524	SBDS	-0.755841	1.11404e-18	1.8974e-17	0.0864333
ENSG00000139722	VPS37B	0.733671	1.17731e-18	2.00329e-17	0.0841712
ENSG00000146830	GIGYF1	0.698596	1.18661e-18	2.01723e-17	0.0793807
ENSG00000065989	PDE4A	1.63057	1.22292e-18	2.07702e-17	0.18967
ENSG00000182512	GLRX5	0.707345	1.28298e-18	2.177e-17	0.0812828
ENSG00000198839	ZNF277	-0.58405	1.32246e-18	2.24191e-17	0.0667502
ENSG00000254901	BORCS8	0.728255	1.39405e-18	2.36108e-17	0.0834386
ENSG00000108349	CASC3	0.242873	1.43532e-18	2.42872e-17	0.0276196
ENSG00000113460	BRIX1	-0.980487	1.44991e-18	2.45112e-17	0.113437
ENSG00000258890	CEP95	-0.748111	1.4614e-18	2.46826e-17	0.0860101
ENSG00000116062	MSH6	-0.500568	1.47582e-18	2.49031e-17	0.0573087
ENSG00000131368	MRPS25	-0.894304	1.49373e-18	2.5182e-17	0.102796
ENSG00000100605	ITPK1	0.888521	1.52365e-18	2.56581e-17	0.103631
ENSG00000160256	SLX9	0.996622	1.52479e-18	2.56581e-17	0.116009
ENSG00000113569	NUP155	-0.534242	1.53677e-18	2.58359e-17	0.0611619
ENSG00000158966	CACHD1	-3.36708	1.54359e-18	2.59266e-17	0.395663
ENSG00000068650	ATP11A	0.905633	1.54637e-18	2.59495e-17	0.104671
ENSG00000165209	STRBP	-1.09265	1.58649e-18	2.65981e-17	0.126272
ENSG00000064961	HMG20B	0.999353	1.64801e-18	2.76042e-17	0.116967
ENSG00000178719	GRINA	1.66493	1.76625e-18	2.95575e-17	0.194689
ENSG00000134571	MYBPC3	1.77106	1.77706e-18	2.97112e-17	0.207023
ENSG00000134030	CTIF	1.13803	1.78198e-18	2.9766e-17	0.132956
ENSG00000126522	ASL	1.04254	1.85457e-18	3.09502e-17	0.121433
ENSG00000137770	CTDSPL2	-0.581925	1.88253e-18	3.13881e-17	0.0667513
ENSG00000164944	VIRMA	-0.45902	1.9427e-18	3.23618e-17	0.0526384
ENSG00000173621	LRFN4	2.3869	1.95643e-18	3.25607e-17	0.296191
ENSG00000106400	ZNHIT1	0.606762	1.9825e-18	3.29645e-17	0.0698732
ENSG00000168228	ZCCHC4	-0.637121	1.98814e-18	3.30281e-17	0.0736922
ENSG00000169692	AGPAT2	1.61635	1.99451e-18	3.31038e-17	0.193095
ENSG00000186020	ZNF529	-0.639407	2.07669e-18	3.44365e-17	0.0735593
ENSG00000198612	COPS8	-0.340971	2.14749e-18	3.5578e-17	0.0390701
ENSG00000079805	DNM2	0.77028	2.15196e-18	3.55874e-17	0.0899339
ENSG00000227500	SCAMP4	1.19101	2.15026e-18	3.55874e-17	0.140345
ENSG00000182489	XKRX	-2.5627	2.17338e-18	3.5909e-17	0.301529
ENSG00000203879	GDI1	0.536515	2.18913e-18	3.61365e-17	0.0616496
ENSG00000123552	USP45	-0.850511	2.36605e-18	3.90217e-17	0.0985468
ENSG00000184465	WDR27	-0.917101	2.44185e-18	4.02354e-17	0.106167
ENSG00000130734	ATG4D	0.885453	2.54101e-18	4.18314e-17	0.102734
ENSG00000196693	ZNF33B	-1.2952	2.6889e-18	4.42261e-17	0.152712
ENSG00000198837	DENND4B	0.760906	2.81412e-18	4.62439e-17	0.0896131
ENSG00000175556	LONRF3	1.25749	2.97379e-18	4.88237e-17	0.147393
ENSG00000136938	ANP32B	-0.514464	3.0107e-18	4.93852e-17	0.0595113
ENSG00000198408	OGA	-0.562727	3.08102e-18	5.04932e-17	0.0649181
ENSG00000160685	ZBTB7B	1.22277	3.08837e-18	5.05682e-17	0.143713
ENSG00000150907	FOXO1	-1.37041	3.09667e-18	5.06587e-17	0.160951
ENSG00000063176	SPHK2	1.12891	3.12376e-18	5.10559e-17	0.132119
ENSG00000113387	SUB1	-0.509684	3.41216e-18	5.57198e-17	0.0590737
ENSG00000198736	MSRB1	0.91673	3.46904e-18	5.65978e-17	0.107152
ENSG00000155016	CYP2U1	-1.18304	3.48027e-18	5.67303e-17	0.138661
ENSG00000166295	ANAPC16	-0.437841	3.48486e-18	5.67543e-17	0.0505447
ENSG00000008710	PKD1	1.07174	3.55384e-18	5.7826e-17	0.125716
ENSG00000196172	ZNF681	-1.14009	3.65765e-18	5.94622e-17	0.134124
ENSG00000204186	ZDBF2	-1.61588	3.84673e-18	6.24802e-17	0.190507
ENSG00000000938	FGR	1.41825	3.96781e-18	6.43895e-17	0.167404
ENSG00000149474	KAT14	-0.750127	3.99641e-18	6.47959e-17	0.0876106
ENSG00000130348	QRSL1	-0.805659	4.03806e-18	6.54041e-17	0.0940391
ENSG00000166200	COPS2	-0.457623	4.0411e-18	6.54041e-17	0.0531072
ENSG00000100726	TELO2	1.03825	4.15507e-18	6.7189e-17	0.121955
ENSG00000146263	MMS22L	-0.965993	4.19366e-18	6.77529e-17	0.112849
ENSG00000196455	PIK3R4	-0.627009	4.21884e-18	6.80994e-17	0.0728719
ENSG00000096063	SRPK1	-0.70956	4.22376e-18	6.81184e-17	0.0825142
ENSG00000126804	ZBTB1	-0.522422	4.27508e-18	6.8885e-17	0.0606364
ENSG00000196923	PDLIM7	2.05728	4.33531e-18	6.97938e-17	0.24518
ENSG00000140939	NOL3	1.43971	4.35468e-18	7.00439e-17	0.173733
ENSG00000198853	RUSC2	1.80473	4.48947e-18	7.21483e-17	0.214693
ENSG00000009724	MASP2	-0.918335	4.59761e-18	7.3821e-17	0.107847
ENSG00000260001	TGFBR3L	2.46982	4.60379e-18	7.38551e-17	0.293863
ENSG00000102383	ZDHHC15	-2.31532	4.70688e-18	7.54426e-17	0.273785
ENSG00000172831	CES2	0.559426	4.83197e-18	7.73795e-17	0.0650128
ENSG00000010292	NCAPD2	-0.503408	4.92685e-18	7.88296e-17	0.0584662
ENSG00000184271	POU6F1	-1.33138	5.0848e-18	8.12854e-17	0.157521
ENSG00000104442	ARMC1	-0.463848	5.14386e-18	8.21575e-17	0.0538412
ENSG00000074706	IPCEF1	-1.72729	5.2399e-18	8.36182e-17	0.204765
ENSG00000162521	RBBP4	-0.355805	5.28326e-18	8.42364e-17	0.0409937
ENSG00000167283	ATP5MG	-0.746635	5.56516e-18	8.86534e-17	0.0880107
ENSG00000028137	TNFRSF1B	1.74387	5.61808e-18	8.94183e-17	0.208619
ENSG00000153395	LPCAT1	1.09939	5.75259e-18	9.14793e-17	0.129738
ENSG00000205730	ITPRIPL2	1.55551	5.77661e-18	9.1781e-17	0.184933
ENSG00000186854	TRABD2A	-2.92847	5.789e-18	9.18978e-17	0.351615
ENSG00000135426	TESPA1	-2.06344	5.84521e-18	9.27095e-17	0.247258
ENSG00000183814	LIN9	-1.28281	5.89912e-18	9.34831e-17	0.151964
ENSG00000132185	FCRLA	-1.95772	6.05349e-18	9.58461e-17	0.233522
ENSG00000141552	ANAPC11	0.924289	6.06606e-18	9.59616e-17	0.109973
ENSG00000089094	KDM2B	0.756839	6.09001e-18	9.6257e-17	0.0892094
ENSG00000142655	PEX14	0.644267	6.16111e-18	9.72965e-17	0.0753265
ENSG00000089123	TASP1	-0.560367	6.37661e-18	1.00612e-16	0.0653591
ENSG00000178149	DALRD3	0.676649	6.73035e-18	1.06102e-16	0.0793467
ENSG00000174175	SELP	-2.3408	6.7392e-18	1.0615e-16	0.28275
ENSG00000108298	RPL19	-0.919289	6.77769e-18	1.06664e-16	0.108835
ENSG00000108344	PSMD3	0.593395	6.94667e-18	1.09229e-16	0.0691185
ENSG00000135040	NAA35	-0.473831	7.46295e-18	1.17246e-16	0.0555165
ENSG00000183684	ALYREF	0.658056	7.5011e-18	1.17743e-16	0.0774763
ENSG00000167785	ZNF558	-0.77302	7.87252e-18	1.23467e-16	0.0908161
ENSG00000138795	LEF1	-3.14748	8.06946e-18	1.26447e-16	0.386394
ENSG00000140743	CDR2	-1.11649	8.26357e-18	1.29377e-16	0.133693
ENSG00000179604	CDC42EP4	1.76606	8.30607e-18	1.29931e-16	0.210894
ENSG00000172878	METAP1D	-2.06796	8.50892e-18	1.3299e-16	0.249652
ENSG00000138036	DYNC2LI1	-0.909709	8.54353e-18	1.33417e-16	0.107489
ENSG00000188529	SRSF10	-0.636564	8.62241e-18	1.34533e-16	0.0745418
ENSG00000121749	TBC1D15	-0.782785	8.77419e-18	1.36784e-16	0.0934008
ENSG00000165915	SLC39A13	0.890026	8.80148e-18	1.37092e-16	0.105493
ENSG00000125652	ALKBH7	1.32927	9.11843e-18	1.41908e-16	0.162072
ENSG00000134193	REG4	-4.10319	9.15195e-18	1.42308e-16	0.498865
ENSG00000183828	NUDT14	1.18832	9.24589e-18	1.43646e-16	0.142856
ENSG00000162959	MEMO1	1.07103	9.29874e-18	1.44344e-16	0.127449
ENSG00000003509	NDUFAF7	-0.460098	9.79986e-18	1.51994e-16	0.0538404
ENSG00000154153	RETREG1	-2.04593	1.09024e-17	1.6895e-16	0.248288
ENSG00000107404	DVL1	1.25463	1.12289e-17	1.73862e-16	0.150195
ENSG00000224051	CPTP	1.22261	1.12455e-17	1.7397e-16	0.147084
ENSG00000136045	PWP1	-0.485667	1.139e-17	1.76057e-16	0.0572022
ENSG00000106484	MEST	-1.57428	1.14103e-17	1.76221e-16	0.188182
ENSG00000131791	PRKAB2	-0.504656	1.1472e-17	1.77025e-16	0.0592087
ENSG00000083123	BCKDHB	-0.929079	1.15041e-17	1.7737e-16	0.110388
ENSG00000108021	TASOR2	-0.708236	1.16942e-17	1.80149e-16	0.0834151
ENSG00000149311	ATM	-1.05252	1.22371e-17	1.88352e-16	0.12549
ENSG00000177051	FBXO46	0.782756	1.27219e-17	1.95649e-16	0.0929116
ENSG00000198746	GPATCH3	0.525253	1.28239e-17	1.97052e-16	0.0619085
ENSG00000156239	N6AMT1	-0.972706	1.30915e-17	2.00993e-16	0.116233
ENSG00000163728	TTC14	-0.608072	1.31173e-17	2.0122e-16	0.0717313
ENSG00000108819	PPP1R9B	1.15967	1.36579e-17	2.09337e-16	0.139579
ENSG00000106771	TMEM245	-0.857313	1.40022e-17	2.14433e-16	0.101875
ENSG00000038358	EDC4	0.443076	1.40628e-17	2.15181e-16	0.0519287
ENSG00000073849	ST6GAL1	-1.3408	1.41861e-17	2.16703e-16	0.160597
ENSG00000162688	AGL	-0.793853	1.41747e-17	2.16703e-16	0.0943658
ENSG00000140320	BAHD1	0.528801	1.4208e-17	2.16857e-16	0.0622937
ENSG00000134900	TPP2	-0.682198	1.42864e-17	2.17871e-16	0.0812941
ENSG00000169223	LMAN2	0.715847	1.52107e-17	2.31773e-16	0.0852767
ENSG00000166260	COX11	-0.805135	1.5334e-17	2.33457e-16	0.0956959
ENSG00000108506	INTS2	-0.611263	1.54013e-17	2.34285e-16	0.0721758
ENSG00000121895	TMEM156	-1.5266	1.55396e-17	2.36192e-16	0.184667
ENSG00000137714	FDX1	1.00961	1.5691e-17	2.38295e-16	0.120706
ENSG00000174206	KICS2	-1.41782	1.59195e-17	2.41562e-16	0.17118
ENSG00000113319	RASGRF2	-2.18308	1.59808e-17	2.42292e-16	0.26401
ENSG00000178297	TMPRSS9	1.35123	1.62327e-17	2.45906e-16	0.163798
ENSG00000128789	PSMG2	-0.239759	1.64096e-17	2.48379e-16	0.0281796
ENSG00000187815	ZFP69	-0.699791	1.67113e-17	2.52736e-16	0.0831268
ENSG00000179088	C12orf42	-2.09938	1.72424e-17	2.60552e-16	0.254049
ENSG00000112339	HBS1L	-0.562119	1.73311e-17	2.61676e-16	0.0663603
ENSG00000165113	GKAP1	-1.3325	1.79639e-17	2.71005e-16	0.160053
ENSG00000072756	TRNT1	-0.630061	1.80285e-17	2.71754e-16	0.0744465
ENSG00000082516	GEMIN5	-0.596909	1.81492e-17	2.73348e-16	0.0712665
ENSG00000197119	SLC25A29	1.6337	1.83018e-17	2.75419e-16	0.199163
ENSG00000165359	INTS6L	-0.799113	1.84077e-17	2.76784e-16	0.0947748
ENSG00000185340	GAS2L1	1.87849	1.85414e-17	2.78565e-16	0.2283
ENSG00000176986	SEC24C	0.408516	1.87587e-17	2.81596e-16	0.0473513
ENSG00000077097	TOP2B	-0.671827	1.89798e-17	2.84681e-16	0.0802089
ENSG00000014919	COX15	-0.495454	1.91728e-17	2.8734e-16	0.0586456
ENSG00000106665	CLIP2	0.99546	1.9472e-17	2.91584e-16	0.11933
ENSG00000113593	PPWD1	-0.778674	1.9707e-17	2.94861e-16	0.0935375
ENSG00000113597	TRAPPC13	-0.42076	1.97486e-17	2.95241e-16	0.0496524
ENSG00000166046	TCP11L2	-1.0994	2.05972e-17	3.07675e-16	0.131953
ENSG00000188785	ZNF548	-1.01516	2.06642e-17	3.08423e-16	0.121388
ENSG00000160703	NLRX1	0.719728	2.17141e-17	3.23827e-16	0.0858345
ENSG00000196456	ZNF775	1.25237	2.18954e-17	3.26265e-16	0.150754
ENSG00000126249	PDCD2L	-1.44996	2.21244e-17	3.29408e-16	0.175402
ENSG00000275052	PPP4R3B	-0.40445	2.24251e-17	3.33612e-16	0.0478855
ENSG00000275791	TRBV10-3	-2.7892	2.26777e-17	3.37095e-16	0.346913
ENSG00000162852	CNST	-0.894096	2.29403e-17	3.40721e-16	0.106903
ENSG00000113296	THBS4	-1.83284	2.30228e-17	3.41667e-16	0.223537
ENSG00000076554	TPD52	-1.48808	2.39933e-17	3.5578e-16	0.179805
ENSG00000161682	FAM171A2	2.15154	2.42654e-17	3.59522e-16	0.262552
ENSG00000047315	POLR2B	-0.344998	2.5261e-17	3.7397e-16	0.0408264
ENSG00000159958	TNFRSF13C	-1.98199	2.55356e-17	3.77727e-16	0.240716
ENSG00000108509	CAMTA2	0.537232	2.57799e-17	3.81032e-16	0.0642903
ENSG00000051128	HOMER3	2.21272	2.62104e-17	3.87081e-16	0.280735
ENSG00000060971	ACAA1	0.655413	2.62886e-17	3.87921e-16	0.0783059
ENSG00000167566	NCKAP5L	1.31391	2.63713e-17	3.88828e-16	0.162126
ENSG00000066739	ATG2B	-0.676901	2.66875e-17	3.93171e-16	0.0808537
ENSG00000130717	UCK1	0.417758	2.7524e-17	4.0484e-16	0.0500253
ENSG00000140990	NDUFB10	0.735538	2.75023e-17	4.0484e-16	0.0887316
ENSG00000183779	ZNF703	2.14602	2.76894e-17	4.06945e-16	0.269894
ENSG00000204843	DCTN1	0.467352	2.80642e-17	4.12121e-16	0.055684
ENSG00000204311	PJVK	-1.47634	2.86423e-17	4.20271e-16	0.179546
ENSG00000079785	DDX1	-0.375247	2.86715e-17	4.20362e-16	0.0446241
ENSG00000100836	PABPN1	0.555863	2.87463e-17	4.21119e-16	0.0664082
ENSG00000163811	WDR43	-0.735527	2.89405e-17	4.23623e-16	0.0883372
ENSG00000203950	RTL8A	0.796215	3.09897e-17	4.53255e-16	0.096093
ENSG00000168876	ANKRD49	-0.779834	3.15068e-17	4.60448e-16	0.0933383
ENSG00000135124	P2RX4	1.55745	3.2065e-17	4.68231e-16	0.190838
ENSG00000197776	KLHDC1	-1.01275	3.2905e-17	4.80113e-16	0.122166
ENSG00000101986	ABCD1	1.83891	3.34201e-17	4.87238e-16	0.225694
ENSG00000106399	RPA3	-0.688566	3.3797e-17	4.9234e-16	0.0826164
ENSG00000115942	ORC2	-1.0112	3.41452e-17	4.97015e-16	0.121815
ENSG00000160209	PDXK	1.11863	3.43909e-17	5.00191e-16	0.137978
ENSG00000198168	SVIP	-1.34284	3.45963e-17	5.02777e-16	0.162784
ENSG00000116584	ARHGEF2	0.931613	3.54124e-17	5.14228e-16	0.112634
ENSG00000143486	EIF2D	-0.791878	3.65435e-17	5.3023e-16	0.0951925
ENSG00000165233	CARD19	1.02414	3.67414e-17	5.32678e-16	0.125003
ENSG00000179588	ZFPM1	1.73666	3.70208e-17	5.36302e-16	0.211699
ENSG00000258102	MAP1LC3B2	0.822907	3.75361e-17	5.43335e-16	0.0994147
ENSG00000143373	ZNF687	0.5352	3.92571e-17	5.67794e-16	0.0639543
ENSG00000145833	DDX46	-0.330781	4.11628e-17	5.94886e-16	0.0392096
ENSG00000143793	C1orf35	0.875002	4.24138e-17	6.12479e-16	0.105909
ENSG00000106144	CASP2	-0.618838	4.52221e-17	6.52517e-16	0.0746062
ENSG00000126903	SLC10A3	0.607409	4.6009e-17	6.63345e-16	0.0732911
ENSG00000015475	BID	1.04461	4.61863e-17	6.65375e-16	0.126554
ENSG00000116771	AGMAT	-2.02236	4.65849e-17	6.70255e-16	0.250858
ENSG00000133641	C12orf29	-0.977158	4.65986e-17	6.70255e-16	0.118519
ENSG00000138107	ACTR1A	0.551999	4.69024e-17	6.74093e-16	0.0663023
ENSG00000183496	MEX3B	1.6119	4.88978e-17	7.02217e-16	0.202373
ENSG00000068323	TFE3	0.928926	5.08641e-17	7.2988e-16	0.111985
ENSG00000100503	NIN	-0.515759	5.42415e-17	7.77732e-16	0.063421
ENSG00000110172	CHORDC1	-0.438473	5.4425e-17	7.7975e-16	0.0523133
ENSG00000160446	ZDHHC12	1.00398	5.4742e-17	7.83675e-16	0.122289
ENSG00000107164	FUBP3	0.351324	5.49736e-17	7.86373e-16	0.0421391
ENSG00000129680	MAP7D3	-0.485442	5.55186e-17	7.93546e-16	0.0584218
ENSG00000136371	MTHFS	1.6948	5.70486e-17	8.14776e-16	0.208961
ENSG00000172046	USP19	0.404116	5.80576e-17	8.28537e-16	0.0493905
ENSG00000186222	BLOC1S4	0.683639	5.84756e-17	8.33849e-16	0.0825164
ENSG00000184922	FMNL1	0.623536	6.02314e-17	8.58216e-16	0.074708
ENSG00000168894	RNF181	0.658411	6.03311e-17	8.58965e-16	0.0797092
ENSG00000186111	PIP5K1C	1.19543	6.0839e-17	8.65519e-16	0.147016
ENSG00000071553	ATP6AP1	1.0237	6.16882e-17	8.76916e-16	0.125465
ENSG00000121879	PIK3CA	-0.652103	6.1985e-17	8.80447e-16	0.0785214
ENSG00000198753	PLXNB3	2.47991	6.37966e-17	9.05475e-16	0.307623
ENSG00000176978	DPP7	1.09838	6.42149e-17	9.10702e-16	0.134776
ENSG00000156172	CFAP418	-1.11075	6.44199e-17	9.12899e-16	0.136523
ENSG00000004455	AK2	-0.426966	6.53653e-17	9.25576e-16	0.0511837
ENSG00000120278	PLEKHG1	-1.44157	6.59653e-17	9.33347e-16	0.17663
ENSG00000153339	TRAPPC8	-0.416942	6.69329e-17	9.46304e-16	0.0499858
ENSG00000102910	LONP2	-0.419395	6.82534e-17	9.64224e-16	0.0504944
ENSG00000129473	BCL2L2	0.886524	6.98778e-17	9.86408e-16	0.108009
ENSG00000198373	WWP2	0.568988	7.02338e-17	9.90666e-16	0.0686353
ENSG00000141576	RNF157	-3.14552	7.11768e-17	1.00319e-15	0.397423
ENSG00000176014	TUBB6	1.43181	7.21192e-17	1.01569e-15	0.17706
ENSG00000135297	MTO1	-0.714883	7.34555e-17	1.03371e-15	0.0870071
ENSG00000184613	NELL2	-2.76944	7.55253e-17	1.06202e-15	0.343661
ENSG00000168264	IRF2BP2	1.00892	7.69601e-17	1.08136e-15	0.123222
ENSG00000119640	ACYP1	-0.767626	7.76408e-17	1.09008e-15	0.0931008
ENSG00000196123	MATCAP1	0.88936	7.78728e-17	1.0925e-15	0.108706
ENSG00000106635	BCL7B	0.5439	7.86193e-17	1.10212e-15	0.0658583
ENSG00000171262	FAM98B	-0.622248	8.15405e-17	1.14219e-15	0.0754935
ENSG00000077152	UBE2T	-1.33261	8.20695e-17	1.14872e-15	0.163896
ENSG00000185418	TARS3	-0.709606	8.4445e-17	1.18106e-15	0.0861476
ENSG00000132471	WBP2	0.783596	8.59869e-17	1.20171e-15	0.0957466
ENSG00000070018	LRP6	-3.04329	9.22992e-17	1.28894e-15	0.379656
ENSG00000102858	MGRN1	1.05687	9.62847e-17	1.34356e-15	0.129354
ENSG00000166086	JAM3	-1.55725	9.81406e-17	1.36841e-15	0.192716
ENSG00000111880	RNGTT	-0.513278	9.95339e-17	1.38678e-15	0.0620397
ENSG00000169740	ZNF32	-0.911367	1.04418e-16	1.4526e-15	0.112078
ENSG00000261308	FIGNL2	2.26629	1.04389e-16	1.4526e-15	0.282157
ENSG00000105722	ERF	0.88667	1.05457e-16	1.46595e-15	0.109673
ENSG00000173041	ZNF680	-1.00094	1.0613e-16	1.47417e-15	0.123778
ENSG00000136527	TRA2B	-0.426041	1.07073e-16	1.48613e-15	0.0518931
ENSG00000205339	IPO7	-0.481694	1.08903e-16	1.51039e-15	0.0583514
ENSG00000167995	BEST1	1.46079	1.10976e-16	1.53797e-15	0.180988
ENSG00000169554	ZEB2	1.02414	1.14585e-16	1.58678e-15	0.125784
ENSG00000129911	KLF16	1.26631	1.15536e-16	1.59874e-15	0.16086
ENSG00000198298	ZNF485	-1.61138	1.16648e-16	1.61289e-15	0.199566
ENSG00000164048	ZNF589	-0.99477	1.16781e-16	1.61351e-15	0.123329
ENSG00000174514	MFSD4A	-1.31908	1.17707e-16	1.62508e-15	0.16265
ENSG00000143761	ARF1	0.645314	1.19297e-16	1.64577e-15	0.0780472
ENSG00000133265	HSPBP1	0.772282	1.19682e-16	1.64984e-15	0.0945926
ENSG00000197756	RPL37A	-0.881244	1.19799e-16	1.6502e-15	0.10902
ENSG00000214413	BBIP1	-0.754237	1.20322e-16	1.65615e-15	0.0921997
ENSG00000160226	CFAP410	0.799251	1.23214e-16	1.69468e-15	0.0984039
ENSG00000189362	NEMP2	-0.928679	1.28497e-16	1.766e-15	0.114006
ENSG00000102890	ELMO3	0.8768	1.31115e-16	1.79994e-15	0.108357
ENSG00000189283	FHIT	-3.0695	1.31163e-16	1.79994e-15	0.386007
ENSG00000128463	EMC4	0.458766	1.31943e-16	1.80928e-15	0.0558178
ENSG00000183864	TOB2	0.59896	1.34041e-16	1.83667e-15	0.0732773
ENSG00000156398	SFXN2	-1.39377	1.36763e-16	1.87256e-15	0.172841
ENSG00000064995	TAF11	-0.375766	1.41734e-16	1.93916e-15	0.0456896
ENSG00000100284	TOM1	1.34068	1.44235e-16	1.9719e-15	0.166082
ENSG00000101246	ARFRP1	0.727087	1.47402e-16	2.01369e-15	0.0888523
ENSG00000162227	TAF6L	0.677221	1.48591e-16	2.02841e-15	0.082962
ENSG00000166037	CEP57	-0.705237	1.50044e-16	2.0467e-15	0.0863929
ENSG00000035115	SH3YL1	-1.1227	1.52887e-16	2.08392e-15	0.138942
ENSG00000084764	MAPRE3	1.05098	1.55169e-16	2.11345e-15	0.12995
ENSG00000272333	KMT2B	0.713429	1.61757e-16	2.20153e-15	0.087441
ENSG00000126895	AVPR2	1.23576	1.68557e-16	2.29238e-15	0.154279
ENSG00000163867	ZMYM6	-0.46502	1.69278e-16	2.30047e-15	0.0568542
ENSG00000166398	GARRE1	-0.566899	1.72705e-16	2.34529e-15	0.069256
ENSG00000204525	HLA-C	1.04969	1.74432e-16	2.36697e-15	0.129905
ENSG00000146063	TRIM41	0.555408	1.74843e-16	2.37079e-15	0.0679141
ENSG00000183963	SMTN	1.36166	1.77236e-16	2.40144e-15	0.170002
ENSG00000266124	MIR5587	1.92518	1.78826e-16	2.42119e-15	0.243131
ENSG00000137944	KYAT3	-0.635438	1.79027e-16	2.42211e-15	0.0779651
ENSG00000198146	ZNF770	-0.726875	1.79878e-16	2.43182e-15	0.0891046
ENSG00000010404	IDS	0.800394	1.83333e-16	2.47669e-15	0.0982013
ENSG00000111605	CPSF6	-0.523374	1.91404e-16	2.58381e-15	0.06343
ENSG00000100599	RIN3	1.2227	1.93222e-16	2.60642e-15	0.15471
ENSG00000034693	PEX3	-0.682337	1.99701e-16	2.69183e-15	0.0838869
ENSG00000005302	MSL3	-0.940058	2.00079e-16	2.69493e-15	0.117078
ENSG00000156482	RPL30	-1.10673	2.06137e-16	2.77447e-15	0.138426
ENSG00000132704	FCRL2	-2.51172	2.11012e-16	2.83799e-15	0.31671
ENSG00000132932	ATP8A2	-2.61086	2.11715e-16	2.84535e-15	0.329988
ENSG00000067704	IARS2	-0.471057	2.13768e-16	2.87082e-15	0.0579431
ENSG00000130402	ACTN4	0.863446	2.16539e-16	2.90376e-15	0.106346
ENSG00000196642	RABL6	0.768308	2.1641e-16	2.90376e-15	0.0951947
ENSG00000253276	CCDC71L	1.17211	2.23363e-16	2.99307e-15	0.145315
ENSG00000081019	RSBN1	-0.628701	2.3038e-16	3.08482e-15	0.0771736
ENSG00000148719	DNAJB12	0.836182	2.31796e-16	3.1015e-15	0.102919
ENSG00000154822	PLCL2	-0.718083	2.35838e-16	3.15327e-15	0.0886254
ENSG00000169583	CLIC3	2.50359	2.47191e-16	3.30265e-15	0.318676
ENSG00000165819	METTL3	-0.372592	2.4869e-16	3.32023e-15	0.0451108
ENSG00000137267	TUBB2A	1.62682	2.50016e-16	3.3355e-15	0.205892
ENSG00000153207	AHCTF1	-0.492645	2.62279e-16	3.49654e-15	0.0604547
ENSG00000139574	NPFF	1.14719	2.6441e-16	3.52238e-15	0.143372
ENSG00000124181	PLCG1	-0.867613	2.67225e-16	3.55728e-15	0.108231
ENSG00000125753	VASP	1.1312	2.72033e-16	3.61864e-15	0.142357
ENSG00000140694	PARN	-0.383497	2.74128e-16	3.64238e-15	0.0470401
ENSG00000269403		2.37841	2.74218e-16	3.64238e-15	0.300466
ENSG00000123600	METTL8	-0.970593	2.77824e-16	3.68759e-15	0.121154
ENSG00000175324	LSM1	0.56095	2.99e-16	3.96577e-15	0.0691923
ENSG00000171462	DLK2	1.03638	3.06916e-16	4.06781e-15	0.12928
ENSG00000103495	MAZ	0.905295	3.07425e-16	4.07159e-15	0.114429
ENSG00000101439	CST3	2.34	3.12733e-16	4.13888e-15	0.30579
ENSG00000134686	PHC2	1.15035	3.14443e-16	4.1585e-15	0.144595
ENSG00000135316	SYNCRIP	-0.556033	3.21466e-16	4.2483e-15	0.0687155
ENSG00000137871	ZNF280D	-0.952161	3.22167e-16	4.25447e-15	0.11943
ENSG00000182463	TSHZ2	-3.7846	3.27237e-16	4.31829e-15	0.485989
ENSG00000196544	BORCS6	0.799093	3.28243e-16	4.32844e-15	0.100184
ENSG00000071655	MBD3	0.868033	3.33952e-16	4.40054e-15	0.108635
ENSG00000118420	UBE3D	-1.15754	3.3562e-16	4.41932e-15	0.145749
ENSG00000112282	MED23	-0.488769	3.37627e-16	4.44146e-15	0.0601893
ENSG00000171453	POLR1C	-0.695591	3.37789e-16	4.44146e-15	0.0863422
ENSG00000168288	MMADHC	-0.396277	3.40009e-16	4.46742e-15	0.0488392
ENSG00000173141	MRPL57	0.697989	3.55154e-16	4.66306e-15	0.0869437
ENSG00000156504	PABIR2	-0.700166	3.61976e-16	4.7492e-15	0.0868146
ENSG00000150457	LATS2	1.08612	3.62563e-16	4.75348e-15	0.135633
ENSG00000167705	RILP	1.48017	3.63457e-16	4.76178e-15	0.188726
ENSG00000184860	SDR42E1	-1.17059	3.64619e-16	4.77357e-15	0.147712
ENSG00000111731	C2CD5	-0.588217	3.66179e-16	4.79056e-15	0.0730107
ENSG00000140368	PSTPIP1	0.704249	3.70136e-16	4.83885e-15	0.0873846
ENSG00000129194	SOX15	1.16828	3.76141e-16	4.91383e-15	0.147768
ENSG00000176102	CSTF3	-0.562952	3.8418e-16	5.01526e-15	0.0697173
ENSG00000185624	P4HB	0.99854	3.89417e-16	5.07999e-15	0.125863
ENSG00000160796	NBEAL2	1.11455	3.98783e-16	5.19845e-15	0.140476
ENSG00000211776	TRAV2	-2.6469	4.01181e-16	5.22597e-15	0.337189
ENSG00000100814	CCNB1IP1	-1.17291	4.01682e-16	5.22875e-15	0.147821
ENSG00000099817	POLR2E	0.92052	4.02277e-16	5.23276e-15	0.115463
ENSG00000167962	ZNF598	0.962577	4.03598e-16	5.2462e-15	0.120278
ENSG00000064102	INTS13	-0.541154	4.06697e-16	5.27895e-15	0.0671499
ENSG00000153107	ANAPC1	-0.850195	4.06536e-16	5.27895e-15	0.105595
ENSG00000142875	PRKACB	-1.17919	4.16845e-16	5.40682e-15	0.148669
ENSG00000067365	METTL22	0.485059	4.25321e-16	5.51284e-15	0.0601088
ENSG00000132952	USPL1	-0.567611	4.34207e-16	5.62401e-15	0.0705913
ENSG00000170445	HARS1	-0.339291	4.39722e-16	5.69076e-15	0.0418201
ENSG00000177272	KCNA3	-1.0254	4.39984e-16	5.69076e-15	0.128719
ENSG00000149273	RPS3	-1.00391	4.40744e-16	5.69654e-15	0.126736
ENSG00000124784	RIOK1	-0.583144	4.41121e-16	5.69736e-15	0.0725492
ENSG00000115365	LANCL1	-0.831691	4.50451e-16	5.81376e-15	0.104048
ENSG00000137720	CFAP68	-1.3891	4.51588e-16	5.8243e-15	0.175806
ENSG00000012211	PRICKLE3	1.08436	4.60245e-16	5.93176e-15	0.137301
ENSG00000168280	KIF5C	-1.66061	4.64015e-16	5.97611e-15	0.213213
ENSG00000116191	RALGPS2	-1.7809	4.76036e-16	6.1266e-15	0.226396
ENSG00000137492	THAP12	-0.506331	4.86918e-16	6.26224e-15	0.0630053
ENSG00000135249	RINT1	-0.734897	4.88637e-16	6.27992e-15	0.0918704
ENSG00000197705	KLHL14	-3.20292	4.91455e-16	6.31169e-15	0.410223
ENSG00000103496	STX4	0.809214	5.138e-16	6.594e-15	0.101738
ENSG00000181991	MRPS11	0.549178	5.20475e-16	6.67497e-15	0.068558
ENSG00000129219	PLD2	1.09335	5.21866e-16	6.6881e-15	0.137451
ENSG00000125107	CNOT1	-0.31625	5.33148e-16	6.82789e-15	0.038955
ENSG00000145882	PCYOX1L	-1.04636	5.36003e-16	6.85964e-15	0.132254
ENSG00000184730	APOBR	1.25509	5.39717e-16	6.90232e-15	0.160277
ENSG00000134283	PPHLN1	-0.542285	5.4075e-16	6.91068e-15	0.0675301
ENSG00000204262	COL5A2	-1.79127	5.41682e-16	6.91773e-15	0.228191
ENSG00000172336	POP7	0.733073	5.47886e-16	6.99207e-15	0.0924849
ENSG00000175602	CCDC85B	2.12407	5.48775e-16	6.99851e-15	0.280555
ENSG00000184916	JAG2	2.06929	5.49897e-16	7.00792e-15	0.264293
ENSG00000114503	NCBP2	-0.426117	5.54043e-16	7.05582e-15	0.0540925
ENSG00000204463	BAG6	0.533848	5.57064e-16	7.08934e-15	0.066378
ENSG00000175040	CHST2	1.91387	5.68489e-16	7.22969e-15	0.244251
ENSG00000140678	ITGAX	1.05566	5.78893e-16	7.35686e-15	0.134083
ENSG00000114853	ZBTB47	1.86091	5.92182e-16	7.51527e-15	0.241592
ENSG00000197279	ZNF165	-2.22483	5.92044e-16	7.51527e-15	0.284249
ENSG00000091009	RBM27	-0.780377	6.0576e-16	7.68224e-15	0.0982222
ENSG00000116001	TIA1	-0.586484	6.23315e-16	7.89937e-15	0.0729723
ENSG00000105698	USF2	1.18689	6.3729e-16	8.07087e-15	0.153777
ENSG00000070423	RNF126	1.06132	6.41431e-16	8.11766e-15	0.134622
ENSG00000137040	RANBP6	-0.637616	6.61364e-16	8.36412e-15	0.0795401
ENSG00000007541	PIGQ	0.760259	6.73397e-16	8.51039e-15	0.0951857
ENSG00000187824	TMEM220	-1.35713	7.00615e-16	8.84824e-15	0.172431
ENSG00000111879	FAM184A	-3.07035	7.24163e-16	9.1393e-15	0.400048
ENSG00000161202	DVL3	0.702485	7.43246e-16	9.37364e-15	0.0878612
ENSG00000215305	VPS16	0.463	7.44326e-16	9.38077e-15	0.0577186
ENSG00000074696	HACD3	-0.666125	7.51098e-16	9.45957e-15	0.0834782
ENSG00000100815	TRIP11	-0.541687	7.57097e-16	9.52854e-15	0.0676123
ENSG00000145390	USP53	-1.65374	7.67253e-16	9.64971e-15	0.211095
ENSG00000050426	LETMD1	-0.577566	7.75962e-16	9.7525e-15	0.072443
ENSG00000087152	ATXN7L3	0.482409	8.13112e-16	1.02124e-14	0.0603224
ENSG00000197385	ZNF860	-2.85199	8.23158e-16	1.03314e-14	0.373542
ENSG00000150403	TMCO3	0.88532	8.5871e-16	1.07702e-14	0.112323
ENSG00000087088	BAX	0.592513	8.68243e-16	1.08823e-14	0.0739589
ENSG00000144895	EIF2A	-0.652204	8.7001e-16	1.0897e-14	0.0823862
ENSG00000073150	PANX2	2.65892	8.70911e-16	1.09007e-14	0.34318
ENSG00000147457	CHMP7	-0.880906	9.27628e-16	1.15947e-14	0.112162
ENSG00000153201	RANBP2	-0.45826	9.2744e-16	1.15947e-14	0.0572835
ENSG00000089775	ZBTB25	-0.884993	9.3997e-16	1.17409e-14	0.112795
ENSG00000102225	CDK16	0.50599	9.71068e-16	1.21211e-14	0.063277
ENSG00000134987	WDR36	-0.668149	9.92283e-16	1.23774e-14	0.084475
ENSG00000100294	MCAT	0.777238	9.9422e-16	1.23931e-14	0.0982581
ENSG00000168256	NKIRAS2	0.756485	9.9746e-16	1.2425e-14	0.0959639
ENSG00000105701	FKBP8	0.89738	1.01045e-15	1.25782e-14	0.114584
ENSG00000109184	DCUN1D4	-0.520836	1.02762e-15	1.27831e-14	0.0651511
ENSG00000046651	OFD1	-0.942955	1.05448e-15	1.31083e-14	0.119635
ENSG00000225614	ZNF469	1.79234	1.05964e-15	1.31635e-14	0.231017
ENSG00000175489	LRRC25	1.38915	1.07684e-15	1.33681e-14	0.178401
ENSG00000169926	KLF13	0.408108	1.08175e-15	1.34199e-14	0.0511143
ENSG00000175634	RPS6KB2	0.442239	1.09095e-15	1.35248e-14	0.0555201
ENSG00000116906	GNPAT	-0.38019	1.11377e-15	1.37984e-14	0.0477334
ENSG00000148308	GTF3C5	0.362721	1.11877e-15	1.38508e-14	0.0455013
ENSG00000186806	VSIG10L	1.47998	1.12638e-15	1.39356e-14	0.190774
ENSG00000182154	MRPL41	1.36868	1.13711e-15	1.40588e-14	0.177963
ENSG00000106692	FKTN	-0.745805	1.14217e-15	1.41119e-14	0.0940198
ENSG00000109113	RAB34	1.16784	1.14351e-15	1.41188e-14	0.150149
ENSG00000119041	GTF3C3	-0.418148	1.22373e-15	1.5099e-14	0.0524292
ENSG00000148335	NTMT1	0.492759	1.2276e-15	1.51365e-14	0.0622321
ENSG00000127914	AKAP9	-0.771558	1.23628e-15	1.52332e-14	0.097406
ENSG00000215440	NPEPL1	0.852766	1.26451e-15	1.55706e-14	0.108898
ENSG00000148468	FAM171A1	-1.93356	1.26569e-15	1.55745e-14	0.251148
ENSG00000131469	RPL27	-1.09383	1.27274e-15	1.56508e-14	0.141073
ENSG00000173208	ABCD2	-1.65341	1.27761e-15	1.57e-14	0.216094
ENSG00000116017	ARID3A	1.33748	1.29099e-15	1.58538e-14	0.177179
ENSG00000137070	IL11RA	-0.977567	1.33159e-15	1.63413e-14	0.124881
ENSG00000100083	GGA1	0.970805	1.37714e-15	1.68849e-14	0.12434
ENSG00000277972	CISD3	1.18518	1.37773e-15	1.68849e-14	0.155355
ENSG00000135775	COG2	-0.320856	1.38184e-15	1.69239e-14	0.0402953
ENSG00000153815	CMIP	1.02961	1.39498e-15	1.70733e-14	0.131348
ENSG00000196793	ZNF239	-1.66338	1.45005e-15	1.77354e-14	0.21511
ENSG00000111321	LTBR	1.31002	1.45177e-15	1.77444e-14	0.170552
ENSG00000134748	PRPF38A	-0.382323	1.45274e-15	1.77444e-14	0.0480001
ENSG00000167193	CRK	0.579508	1.49885e-15	1.82954e-14	0.073206
ENSG00000101216	GMEB2	0.521644	1.51178e-15	1.84409e-14	0.0657475
ENSG00000159593	NAE1	-0.819398	1.51367e-15	1.84516e-14	0.104082
ENSG00000166326	TRIM44	-0.330999	1.55777e-15	1.89765e-14	0.0415692
ENSG00000186814	ZSCAN30	-0.749185	1.61372e-15	1.96449e-14	0.0952678
ENSG00000121680	PEX16	0.5812	1.62601e-15	1.97813e-14	0.0736838
ENSG00000187961	KLHL17	0.936982	1.6965e-15	2.06251e-14	0.120032
ENSG00000163492	CCDC141	-2.34303	1.72154e-15	2.09155e-14	0.305763
ENSG00000100575	TIMM9	-1.07278	1.74189e-15	2.11487e-14	0.138379
ENSG00000146281	PM20D2	-0.698207	1.75456e-15	2.12883e-14	0.0885355
ENSG00000105472	CLEC11A	2.176	1.86252e-15	2.25833e-14	0.288148
ENSG00000176208	ATAD5	-0.667988	1.96377e-15	2.37951e-14	0.0848049
ENSG00000170909	OSCAR	1.79745	2.01173e-15	2.43599e-14	0.234349
ENSG00000196839	ADA	1.97195	2.06537e-15	2.49929e-14	0.256898
ENSG00000148396	SEC16A	0.45343	2.09668e-15	2.53549e-14	0.0572221
ENSG00000160633	SAFB	0.45558	2.11265e-15	2.55312e-14	0.0578835
ENSG00000164970	FAM219A	0.842609	2.12232e-15	2.5631e-14	0.107319
ENSG00000070950	RAD18	-0.5978	2.13497e-15	2.57666e-14	0.0759968
ENSG00000103043	VAC14	1.16655	2.16575e-15	2.61209e-14	0.150331
ENSG00000005801	ZNF195	-0.494271	2.17994e-15	2.62746e-14	0.0627101
ENSG00000138439	FAM117B	-1.57967	2.19988e-15	2.64974e-14	0.205603
ENSG00000116127	ALMS1	-0.788983	2.20876e-15	2.65868e-14	0.100752
ENSG00000112146	FBXO9	-0.530882	2.21081e-15	2.6594e-14	0.0673545
ENSG00000063601	MTMR1	-0.740438	2.22922e-15	2.67977e-14	0.094534
ENSG00000085465	OVGP1	-1.90885	2.23381e-15	2.68175e-14	0.251812
ENSG00000188566	NDOR1	0.807359	2.23357e-15	2.68175e-14	0.103749
ENSG00000211593	IGKJ5	-2.87904	2.28627e-15	2.74293e-14	0.378154
ENSG00000109606	DHX15	-0.324399	2.3147e-15	2.7752e-14	0.04127
ENSG00000085872	CHERP	0.805276	2.33365e-15	2.79609e-14	0.103364
ENSG00000196411	EPHB4	-2.11169	2.46802e-15	2.95514e-14	0.280361
ENSG00000114686	MRPL3	-0.781064	2.49828e-15	2.9894e-14	0.101011
ENSG00000023839	ABCC2	-0.973841	2.58278e-15	3.08849e-14	0.125487
ENSG00000113716	HMGXB3	0.506657	2.6091e-15	3.11791e-14	0.0646326
ENSG00000081052	COL4A4	-2.13029	2.62432e-15	3.13405e-14	0.280683
ENSG00000131748	STARD3	0.639625	2.77218e-15	3.30801e-14	0.082266
ENSG00000154229	PRKCA	-1.36181	2.77362e-15	3.30801e-14	0.181619
ENSG00000142330	CAPN10	0.858286	2.78276e-15	3.31674e-14	0.110854
ENSG00000185414	MRPL30	-0.371915	2.79353e-15	3.3274e-14	0.0473267
ENSG00000172830	SSH3	0.836529	2.85796e-15	3.40193e-14	0.108244
ENSG00000088035	ALG6	-0.634798	2.95855e-15	3.51857e-14	0.0812102
ENSG00000177169	ULK1	0.920747	2.95981e-15	3.51857e-14	0.118442
ENSG00000156170	NDUFAF6	-0.743641	3.0259e-15	3.59478e-14	0.096058
ENSG00000080503	SMARCA2	-0.485559	3.03273e-15	3.60055e-14	0.0618663
ENSG00000115694	STK25	0.428914	3.07535e-15	3.64877e-14	0.0548162
ENSG00000186106	ANKRD46	-0.655482	3.20519e-15	3.80036e-14	0.0839571
ENSG00000147419	CCDC25	-0.510809	3.23836e-15	3.83719e-14	0.0656265
ENSG00000108604	SMARCD2	0.335044	3.3411e-15	3.95635e-14	0.0426912
ENSG00000110697	PITPNM1	0.845837	3.37238e-15	3.9908e-14	0.109653
ENSG00000130254	SAFB2	0.499716	3.3863e-15	4.00467e-14	0.0638762
ENSG00000101842	VSIG1	-2.87569	3.6187e-15	4.27673e-14	0.386572
ENSG00000101182	PSMA7	0.582363	3.8664e-15	4.56651e-14	0.0753616
ENSG00000168958	MFF	-0.438692	3.98868e-15	4.70789e-14	0.0561345
ENSG00000188305	PEAK3	1.73184	3.9985e-15	4.71642e-14	0.230741
ENSG00000101546	RBFA	-0.812582	4.09033e-15	4.82162e-14	0.105787
ENSG00000168140	VASN	1.23678	4.09824e-15	4.82782e-14	0.162254
ENSG00000156983	BRPF1	0.517837	4.16577e-15	4.9042e-14	0.066923
ENSG00000152457	DCLRE1C	-0.437299	4.2755e-15	5.03013e-14	0.0561588
ENSG00000177853	ZNF518A	-0.459815	4.31193e-15	5.06971e-14	0.0589259
ENSG00000159842	ABR	1.1491	4.37145e-15	5.13639e-14	0.149526
ENSG00000168813	ZNF507	-1.20926	4.44309e-15	5.21719e-14	0.158012
ENSG00000067533	RRP15	-1.02003	4.45448e-15	5.2272e-14	0.133734
ENSG00000004399	PLXND1	1.33459	4.55345e-15	5.3399e-14	0.176761
ENSG00000122565	CBX3	-0.415163	4.73461e-15	5.54878e-14	0.0537792
ENSG00000130956	HABP4	-0.951765	4.79754e-15	5.61892e-14	0.124393
ENSG00000197114	ZGPAT	0.730344	4.80093e-15	5.61927e-14	0.0949987
ENSG00000171314	PGAM1	0.855562	4.8297e-15	5.64932e-14	0.111524
ENSG00000177570	SAMD12	-2.56508	4.83518e-15	5.65211e-14	0.342045
ENSG00000101935	AMMECR1	-0.623563	4.8567e-15	5.66999e-14	0.0805463
ENSG00000110777	POU2AF1	-2.10472	4.85393e-15	5.66999e-14	0.281119
ENSG00000085788	DDHD2	-0.633378	4.95363e-15	5.77944e-14	0.0817098
ENSG00000175305	CCNE2	-0.904039	4.98479e-15	5.81207e-14	0.11744
ENSG00000140548	ZNF710	1.3129	5.02654e-15	5.85701e-14	0.172762
ENSG00000086200	IPO11	-0.645205	5.05821e-15	5.89015e-14	0.08365
ENSG00000103510	KAT8	0.358002	5.06175e-15	5.89051e-14	0.0459469
ENSG00000004766	VPS50	-0.566724	5.15515e-15	5.99537e-14	0.0732827
ENSG00000168003	SLC3A2	0.926876	5.18375e-15	6.02479e-14	0.120874
ENSG00000135632	SMYD5	-0.996379	5.55321e-15	6.45008e-14	0.130319
ENSG00000185104	FAF1	-0.478687	5.56853e-15	6.46376e-14	0.0616695
ENSG00000148400	NOTCH1	1.56349	5.64036e-15	6.54296e-14	0.208293
ENSG00000090020	SLC9A1	0.585851	5.76354e-15	6.6816e-14	0.0758131
ENSG00000053770	AP5M1	-0.425025	5.78034e-15	6.69682e-14	0.0547442
ENSG00000072310	SREBF1	1.34264	5.87815e-15	6.8036e-14	0.179392
ENSG00000110717	NDUFS8	0.751491	5.87998e-15	6.8036e-14	0.0981042
ENSG00000010295	IFFO1	0.922257	5.90603e-15	6.82941e-14	0.122078
ENSG00000159792	PSKH1	0.579774	5.91767e-15	6.83853e-14	0.0751757
ENSG00000023734	STRAP	-0.355228	5.93665e-15	6.85611e-14	0.045825
ENSG00000196268	ZNF493	-0.91679	5.96899e-15	6.8891e-14	0.119702
ENSG00000100941	PNN	-0.511726	5.98511e-15	6.90333e-14	0.0660133
ENSG00000125630	POLR1B	-0.79792	5.99369e-15	6.90886e-14	0.103936
ENSG00000175455	CCDC14	-0.67437	6.01174e-15	6.92528e-14	0.0874592
ENSG00000148339	SLC25A25	1.00034	6.02549e-15	6.93674e-14	0.132715
ENSG00000133773	CCDC59	-0.642391	6.13034e-15	7.0509e-14	0.0831849
ENSG00000162461	SLC25A34	1.68281	6.13239e-15	7.0509e-14	0.227183
ENSG00000129484	PARP2	-0.550719	6.15691e-15	7.07016e-14	0.0713123
ENSG00000142208	AKT1	0.579805	6.15625e-15	7.07016e-14	0.0755229
ENSG00000183401	CCDC159	0.541029	6.24094e-15	7.16215e-14	0.0701769
ENSG00000168661	ZNF30	-1.25253	6.25832e-15	7.17757e-14	0.165225
ENSG00000064012	CASP8	-0.894702	6.50323e-15	7.45377e-14	0.1168
ENSG00000105819	PMPCB	-0.380414	6.63752e-15	7.6029e-14	0.0490334
ENSG00000211749	TRBV23-1	-3.30916	6.84107e-15	7.83114e-14	0.455098
ENSG00000069509	FUNDC1	-0.542846	6.88495e-15	7.87642e-14	0.0704233
ENSG00000165801	ARHGEF40	1.24511	7.08143e-15	8.09611e-14	0.164682
ENSG00000174718	RESF1	-0.843933	7.1721e-15	8.19463e-14	0.109759
ENSG00000068724	TTC7A	0.780045	7.25995e-15	8.28981e-14	0.102539
ENSG00000106615	RHEB	0.883591	7.32041e-15	8.35361e-14	0.116255
ENSG00000161091	MFSD12	1.09794	7.39949e-15	8.43857e-14	0.147231
ENSG00000176731	RBIS	-0.722541	7.45601e-15	8.49771e-14	0.0939782
ENSG00000075407	ZNF37A	-0.632817	7.69993e-15	8.77021e-14	0.0820348
ENSG00000198105	ZNF248	-0.996615	7.74842e-15	8.81994e-14	0.131855
ENSG00000256574	OR13A1	-3.12408	7.88974e-15	8.97519e-14	0.414748
ENSG00000153037	SRP19	-0.491254	7.92969e-15	9.01502e-14	0.0635543
ENSG00000107611	CUBN	-1.31706	7.9614e-15	9.04214e-14	0.174157
ENSG00000130985	UBA1	0.540482	7.96347e-15	9.04214e-14	0.0699655
ENSG00000117643	MAN1C1	-1.3153	8.12774e-15	9.2229e-14	0.175182
ENSG00000108479	GALK1	1.19575	8.29597e-15	9.40796e-14	0.161919
ENSG00000225556	C2CD4D	1.43135	8.31411e-15	9.42266e-14	0.192005
ENSG00000177105	RHOG	0.959425	8.38888e-15	9.50149e-14	0.126882
ENSG00000105202	FBL	-0.846115	8.56771e-15	9.69801e-14	0.111505
ENSG00000119777	TMEM214	0.556836	8.57431e-15	9.69946e-14	0.0725823
ENSG00000213445	SIPA1	1.05961	8.8942e-15	1.00551e-13	0.14042
ENSG00000187790	FANCM	-0.565755	8.92503e-15	1.00837e-13	0.0735736
ENSG00000069849	ATP1B3	0.700937	9.10323e-15	1.02786e-13	0.0913729
ENSG00000167625	ZNF526	0.694144	9.23175e-15	1.04173e-13	0.0908204
ENSG00000138794	CASP6	-0.84299	9.36767e-15	1.05641e-13	0.11153
ENSG00000000003	TSPAN6	-2.93448	9.52922e-15	1.07397e-13	0.393929
ENSG00000167615	LENG8	0.565344	9.55901e-15	1.07666e-13	0.0737149
ENSG00000172650	AGAP5	1.50973	9.58456e-15	1.0782e-13	0.202686
ENSG00000198231	DDX42	-0.244195	9.58146e-15	1.0782e-13	0.0315919
ENSG00000258366	RTEL1	0.989114	9.64099e-15	1.08388e-13	0.130239
ENSG00000131389	SLC6A6	0.887235	9.71271e-15	1.09127e-13	0.11695
ENSG00000115504	EHBP1	-0.708914	9.83887e-15	1.10477e-13	0.092722
ENSG00000102032	RENBP	1.48836	9.85252e-15	1.10562e-13	0.201433
ENSG00000166881	NEMP1	-0.618913	9.99926e-15	1.12139e-13	0.0808085
ENSG00000111737	RAB35	0.736695	1.01691e-14	1.13974e-13	0.0960442
ENSG00000177728	TMEM94	0.765144	1.02738e-14	1.15076e-13	0.100611
ENSG00000148843	PDCD11	-0.610247	1.05457e-14	1.1805e-13	0.0795997
ENSG00000122390	NAA60	0.682548	1.05603e-14	1.18141e-13	0.0893191
ENSG00000088038	CNOT3	0.582284	1.06247e-14	1.18788e-13	0.0760465
ENSG00000138138	ATAD1	-0.636025	1.07848e-14	1.20504e-13	0.082956
ENSG00000174607	UGT8	-2.70882	1.11069e-14	1.24028e-13	0.365017
ENSG00000186687	LYRM7	-0.8688	1.11362e-14	1.24278e-13	0.114311
ENSG00000161298	ZNF382	-1.21424	1.11635e-14	1.24507e-13	0.162023
ENSG00000142327	RNPEPL1	0.881852	1.1459e-14	1.27724e-13	0.117462
ENSG00000100299	ARSA	0.717677	1.14749e-14	1.27824e-13	0.0948262
ENSG00000262246	CORO7	0.896979	1.15342e-14	1.28405e-13	0.119377
ENSG00000188428	BLOC1S5	-0.591462	1.15425e-14	1.28419e-13	0.0776001
ENSG00000110400	NECTIN1	0.975213	1.15903e-14	1.28872e-13	0.129679
ENSG00000175029	CTBP2	0.943408	1.16543e-14	1.29504e-13	0.124747
ENSG00000138031	ADCY3	0.877863	1.17773e-14	1.30792e-13	0.116171
ENSG00000213676	ATF6B	0.485235	1.19384e-14	1.325e-13	0.0636548
ENSG00000178927	CYBC1	0.548074	1.1987e-14	1.32958e-13	0.0715639
ENSG00000114395	CYB561D2	0.777967	1.20145e-14	1.33182e-13	0.10291
ENSG00000103342	GSPT1	-0.515325	1.20666e-14	1.33679e-13	0.0677726
ENSG00000147164	SNX12	0.590555	1.21216e-14	1.34206e-13	0.0773506
ENSG00000175467	SART1	0.514138	1.21594e-14	1.34543e-13	0.0672976
ENSG00000173264	GPR137	0.853067	1.25516e-14	1.38798e-13	0.112259
ENSG00000113441	LNPEP	-0.769213	1.32522e-14	1.46457e-13	0.101548
ENSG00000185122	HSF1	0.86971	1.35484e-14	1.4964e-13	0.115723
ENSG00000103024	NME3	1.20621	1.36521e-14	1.50694e-13	0.162619
ENSG00000181896	ZNF101	-1.08046	1.3743e-14	1.51606e-13	0.144324
ENSG00000107014	RLN2	-1.95718	1.37903e-14	1.52036e-13	0.264951
ENSG00000153044	CENPH	-1.12252	1.41149e-14	1.5552e-13	0.149059
ENSG00000241058	NSUN6	-0.936249	1.41881e-14	1.56232e-13	0.124964
ENSG00000106153	CHCHD2	0.716213	1.42729e-14	1.56976e-13	0.0942165
ENSG00000166181	API5	-0.304375	1.42685e-14	1.56976e-13	0.0394066
ENSG00000141428	C18orf21	-0.603409	1.43277e-14	1.57403e-13	0.0792592
ENSG00000167491	GATAD2A	0.513302	1.4329e-14	1.57403e-13	0.067345
ENSG00000115761	NOL10	-0.400066	1.44054e-14	1.58147e-13	0.0522749
ENSG00000068903	SIRT2	0.6694	1.47865e-14	1.62233e-13	0.0883991
ENSG00000172244	C5orf34	-0.993796	1.48965e-14	1.63342e-13	0.131798
ENSG00000138095	LRPPRC	-0.802227	1.51219e-14	1.65713e-13	0.106502
ENSG00000131037	EPS8L1	1.77852	1.52947e-14	1.67506e-13	0.240013
ENSG00000101557	USP14	-0.339955	1.53923e-14	1.68474e-13	0.044434
ENSG00000138442	WDR12	-0.82564	1.54059e-14	1.68522e-13	0.110277
ENSG00000254470	AP5B1	1.0769	1.55894e-14	1.70427e-13	0.143742
ENSG00000114861	FOXP1	-1.12769	1.56158e-14	1.70613e-13	0.150083
ENSG00000120727	PAIP2	0.372059	1.61058e-14	1.75861e-13	0.0486896
ENSG00000147687	TATDN1	-0.835019	1.65701e-14	1.80823e-13	0.111526
ENSG00000082512	TRAF5	-0.860442	1.67019e-14	1.82151e-13	0.114162
ENSG00000125656	CLPP	0.68753	1.69291e-14	1.84519e-13	0.091113
ENSG00000135372	NAT10	-0.63507	1.72654e-14	1.88073e-13	0.0838857
ENSG00000135253	KCP	2.45259	1.74525e-14	1.89996e-13	0.33637
ENSG00000171456	ASXL1	-0.550971	1.79831e-14	1.95656e-13	0.0724392
ENSG00000157216	SSBP3	0.714849	1.80505e-14	1.96272e-13	0.0933824
ENSG00000100722	ZC3H14	-0.68219	1.8403e-14	1.99985e-13	0.0905569
ENSG00000035141	FAM136A	-0.700202	1.85371e-14	2.01323e-13	0.0929002
ENSG00000177628	GBA1	1.06866	1.88379e-14	2.04468e-13	0.143585
ENSG00000162522	KIAA1522	1.28944	1.88756e-14	2.04756e-13	0.173082
ENSG00000104903	LYL1	1.84965	1.92843e-14	2.09064e-13	0.260731
ENSG00000143457	GOLPH3L	-0.863797	1.93216e-14	2.09345e-13	0.114913
ENSG00000175087	PDIK1L	-0.768922	1.94534e-14	2.10646e-13	0.101748
ENSG00000165527	ARF6	0.437855	1.95871e-14	2.11969e-13	0.0575578
ENSG00000185798	WDR53	-0.494067	1.98522e-14	2.1471e-13	0.0650422
ENSG00000165879	FRAT1	0.904161	1.99696e-14	2.15852e-13	0.120193
ENSG00000154710	RABGEF1	0.864944	1.99998e-14	2.1605e-13	0.115555
ENSG00000134291	TMEM106C	-0.704257	2.00784e-14	2.16771e-13	0.0932194
ENSG00000059145	UNKL	1.06458	2.03331e-14	2.1939e-13	0.14249
ENSG00000035928	RFC1	-0.587067	2.03516e-14	2.19461e-13	0.0774478
ENSG00000162642	C1orf52	-0.330351	2.10341e-14	2.26686e-13	0.0432903
ENSG00000087157	PGS1	1.04424	2.1261e-14	2.28996e-13	0.139356
ENSG00000156858	PRR14	0.632336	2.14818e-14	2.31237e-13	0.0836034
ENSG00000156510	HKDC1	-2.71962	2.16253e-14	2.32644e-13	0.371637
ENSG00000125734	GPR108	0.885335	2.19733e-14	2.36248e-13	0.117823
ENSG00000071794	HLTF	-0.991169	2.2247e-14	2.3905e-13	0.132331
ENSG00000052841	TTC17	-0.35884	2.2318e-14	2.39594e-13	0.0471162
ENSG00000142892	PIGK	-0.930999	2.23239e-14	2.39594e-13	0.124668
ENSG00000172725	CORO1B	1.25228	2.2477e-14	2.41095e-13	0.170726
ENSG00000198707	CEP290	-0.917993	2.29054e-14	2.45546e-13	0.122076
ENSG00000133247	KMT5C	1.06412	2.30282e-14	2.46575e-13	0.142162
ENSG00000147642	SYBU	-3.11188	2.30284e-14	2.46575e-13	0.425649
ENSG00000135069	PSAT1	-1.87417	2.38583e-14	2.5531e-13	0.254483
ENSG00000181444	ZNF467	1.9674	2.40618e-14	2.57337e-13	0.274869
ENSG00000134463	ECHDC3	1.02386	2.46586e-14	2.63451e-13	0.13782
ENSG00000167967	E4F1	0.869595	2.46624e-14	2.63451e-13	0.116388
ENSG00000138193	PLCE1	-1.06849	2.46976e-14	2.63672e-13	0.143839
ENSG00000135956	TMEM127	0.83044	2.47629e-14	2.64215e-13	0.111126
ENSG00000148356	LRSAM1	0.49956	2.50048e-14	2.6664e-13	0.0661191
ENSG00000154305	MIA3	-0.459432	2.52684e-14	2.69293e-13	0.0605226
ENSG00000112182	BACH2	-1.81157	2.5587e-14	2.7237e-13	0.247297
ENSG00000188229	TUBB4B	0.849279	2.55791e-14	2.7237e-13	0.114212
ENSG00000174851	YIF1A	0.819044	2.56558e-14	2.72942e-13	0.109827
ENSG00000178562	CD28	-2.57231	2.63412e-14	2.80072e-13	0.357126
ENSG00000106682	EIF4H	0.262306	2.6653e-14	2.83222e-13	0.0345281
ENSG00000121903	ZSCAN20	0.668623	2.6733e-14	2.83906e-13	0.0892886
ENSG00000147044	CASK	-0.630109	2.68632e-14	2.85122e-13	0.0836816
ENSG00000141506	PIK3R5	1.28352	2.71219e-14	2.87701e-13	0.174356
ENSG00000160055	TMEM234	0.668067	2.73501e-14	2.89953e-13	0.0888773
ENSG00000081154	PCNP	-0.39118	2.74096e-14	2.90415e-13	0.0515948
ENSG00000187954	ZFTRAF1	0.670426	2.79718e-14	2.96199e-13	0.0892233
ENSG00000145700	ANKRD31	-2.47149	2.90073e-14	3.06977e-13	0.338829
ENSG00000204219	TCEA3	-3.34873	2.90233e-14	3.06977e-13	0.46872
ENSG00000166595	CIAO2B	0.58806	2.91617e-14	3.08262e-13	0.078262
ENSG00000104969	SGTA	0.590994	2.93781e-14	3.10369e-13	0.0788065
ENSG00000152495	CAMK4	-2.22144	2.9642e-14	3.12976e-13	0.307735
ENSG00000187840	EIF4EBP1	1.39347	3.02023e-14	3.18707e-13	0.196645
ENSG00000116809	ZBTB17	1.34572	3.07726e-14	3.24537e-13	0.181967
ENSG00000124596	OARD1	-0.53251	3.12221e-14	3.28897e-13	0.0706914
ENSG00000163785	RYK	-0.585698	3.12158e-14	3.28897e-13	0.0777109
ENSG00000105404	RABAC1	0.876891	3.15094e-14	3.31731e-13	0.118835
ENSG00000011451	WIZ	0.752689	3.18634e-14	3.35264e-13	0.100076
ENSG00000101911	PRPS2	-0.521586	3.26089e-14	3.42911e-13	0.0691632
ENSG00000181790	ADGRB1	2.47356	3.34877e-14	3.51949e-13	0.340085
ENSG00000186104	CYP2R1	-0.86473	3.35708e-14	3.52619e-13	0.115604
ENSG00000136521	NDUFB5	-0.690097	3.36861e-14	3.53626e-13	0.0925251
ENSG00000177425	PAWR	-1.94577	3.41023e-14	3.57789e-13	0.267378
ENSG00000162971	TYW5	-0.5849	3.43395e-14	3.60071e-13	0.0776439
ENSG00000091947	TMEM101	0.456241	3.462e-14	3.62803e-13	0.0607323
ENSG00000153253	SCN3A	-3.39064	3.48903e-14	3.65426e-13	0.468768
ENSG00000072958	AP1M1	0.419032	3.58583e-14	3.75348e-13	0.0555165
ENSG00000163104	SMARCAD1	-0.692997	3.66793e-14	3.83722e-13	0.0927121
ENSG00000188295	ZNF669	-0.614517	3.67439e-14	3.84177e-13	0.0824619
ENSG00000163125	RPRD2	-0.693106	3.78851e-14	3.95882e-13	0.09301
ENSG00000048162	NOP16	-0.821715	3.82574e-14	3.99543e-13	0.11099
ENSG00000124802	EEF1E1	-1.0114	3.88091e-14	4.05073e-13	0.136943
ENSG00000085117	CD82	1.57757	3.91667e-14	4.08571e-13	0.215349
ENSG00000121797	CCRL2	1.24583	3.98995e-14	4.15977e-13	0.169329
ENSG00000177989	ODF3B	2.34816	4.11128e-14	4.28382e-13	0.32466
ENSG00000184990	SIVA1	0.634837	4.12328e-14	4.29387e-13	0.0850321
ENSG00000151461	UPF2	-0.377323	4.24703e-14	4.42021e-13	0.0499387
ENSG00000148248	SURF4	0.551676	4.31142e-14	4.48466e-13	0.0738243
ENSG00000131148	EMC8	0.431134	4.38524e-14	4.55885e-13	0.0575296
ENSG00000120458	MSANTD2	-0.573483	4.38776e-14	4.55887e-13	0.076661
ENSG00000175224	ATG13	0.172562	4.39635e-14	4.56519e-13	0.0228632
ENSG00000138326	RPS24	-0.597347	4.41354e-14	4.58043e-13	0.0801592
ENSG00000157110	RBPMS	-0.643783	4.41903e-14	4.58091e-13	0.0863181
ENSG00000177225	GATD1	0.580293	4.41855e-14	4.58091e-13	0.077849
ENSG00000141905	NFIC	1.03791	4.43876e-14	4.59875e-13	0.141115
ENSG00000131591	C1orf159	0.997119	4.47321e-14	4.6318e-13	0.134308
ENSG00000152234	ATP5F1A	-0.469043	4.56547e-14	4.72465e-13	0.0628515
ENSG00000160233	LRRC3	1.36943	4.73037e-14	4.89253e-13	0.189685
ENSG00000131653	TRAF7	0.657743	4.75373e-14	4.91389e-13	0.0886107
ENSG00000186352	ANKRD37	1.17116	4.7728e-14	4.93081e-13	0.160439
ENSG00000168646	AXIN2	-2.26016	5.08328e-14	5.2486e-13	0.317139
ENSG00000233493	TMEM238	1.9222	5.15589e-14	5.32055e-13	0.267177
ENSG00000105613	MAST1	1.47587	5.17501e-14	5.33726e-13	0.204315
ENSG00000197599	CCDC154	1.01763	5.23398e-14	5.39503e-13	0.139045
ENSG00000197530	MIB2	1.49727	5.23754e-14	5.39565e-13	0.20772
ENSG00000112739	PRPF4B	-0.360703	5.24305e-14	5.39827e-13	0.0479865
ENSG00000102710	SUPT20H	-0.36982	5.26067e-14	5.41335e-13	0.0494355
ENSG00000173473	SMARCC1	-0.485135	5.295e-14	5.4456e-13	0.0647904
ENSG00000105325	FZR1	0.890615	5.30052e-14	5.44821e-13	0.121635
ENSG00000105085	MED26	0.7234	5.35846e-14	5.50466e-13	0.0975617
ENSG00000103005	USB1	0.726268	5.37572e-14	5.51927e-13	0.0979972
ENSG00000119929	CUTC	-0.462709	5.4444e-14	5.58664e-13	0.0620079
ENSG00000184221	OLIG1	2.74795	5.55529e-14	5.69722e-13	0.389218
ENSG00000094880	CDC23	-0.281507	5.62483e-14	5.76529e-13	0.0374922
ENSG00000284730	TMDD1	4.88226	5.82938e-14	5.97159e-13	0.722926
ENSG00000173080	RXFP4	1.98637	6.00633e-14	6.1494e-13	0.276306
ENSG00000142186	SCYL1	0.453339	6.06257e-14	6.20349e-13	0.0592435
ENSG00000126458	RRAS	1.39084	6.17979e-14	6.31989e-13	0.193212
ENSG00000105327	BBC3	1.38449	6.30628e-14	6.44563e-13	0.194235
ENSG00000127663	KDM4B	0.731809	6.32037e-14	6.45641e-13	0.0985616
ENSG00000144711	IQSEC1	0.613825	6.40597e-14	6.54019e-13	0.0823041
ENSG00000038382	TRIO	1.11589	6.49188e-14	6.62419e-13	0.150894
ENSG00000188848	BEND4	-2.02218	6.51511e-14	6.64417e-13	0.281805
ENSG00000214022	REPIN1	0.738763	6.58687e-14	6.71359e-13	0.0993704
ENSG00000117410	ATP6V0B	1.03656	6.64826e-14	6.77238e-13	0.143288
ENSG00000099385	BCL7C	0.746705	6.67143e-14	6.79219e-13	0.1016
ENSG00000060688	SNRNP40	-0.361017	6.79922e-14	6.91842e-13	0.0484157
ENSG00000162298	SYVN1	0.523089	6.81303e-14	6.92861e-13	0.0722515
ENSG00000120440	TTLL2	-1.91034	6.83972e-14	6.95187e-13	0.263521
ENSG00000127580	WDR24	0.989779	6.98712e-14	7.09773e-13	0.135732
ENSG00000104856	RELB	1.50619	7.01203e-14	7.11906e-13	0.207526
ENSG00000236104	ZBTB22	0.559029	7.09779e-14	7.20212e-13	0.0751897
ENSG00000134765	DSC1	-3.86201	7.12399e-14	7.22468e-13	0.560005
ENSG00000106330	MOSPD3	0.896813	7.20251e-14	7.30025e-13	0.122459
ENSG00000179943	FIZ1	0.611423	7.22469e-14	7.31866e-13	0.0828496
ENSG00000189164	ZNF527	-0.864479	7.22888e-14	7.31884e-13	0.118063
ENSG00000179051	RCC2	0.421086	7.30384e-14	7.39063e-13	0.0567853
ENSG00000188827	SLX4	0.643564	7.34069e-14	7.42379e-13	0.0870025
ENSG00000083845	RPS5	-1.04503	7.37063e-14	7.44994e-13	0.144451
ENSG00000141480	ARRB2	0.850153	7.41821e-14	7.49387e-13	0.116896
ENSG00000132205	EMILIN2	1.19658	7.52474e-14	7.59727e-13	0.164679
ENSG00000136100	VPS36	-0.337323	7.60059e-14	7.66961e-13	0.0451337
ENSG00000284395	PERCC1	1.79144	7.6545e-14	7.71973e-13	0.24915
ENSG00000262874	C19orf84	1.95026	7.71199e-14	7.77341e-13	0.271893
ENSG00000113356	POLR3G	-1.14038	7.73385e-14	7.79114e-13	0.157438
ENSG00000169621	APLF	-0.838037	7.83186e-14	7.88552e-13	0.113976
ENSG00000070614	NDST1	1.4773	7.8423e-14	7.89167e-13	0.204005
ENSG00000050030	NEXMIF	-2.79798	7.86582e-14	7.91097e-13	0.398331
ENSG00000156381	ANKRD9	1.74646	7.89566e-14	7.9366e-13	0.251581
ENSG00000198315	ZKSCAN8	-0.50069	7.90678e-14	7.94339e-13	0.0672977
ENSG00000140044	JDP2	1.38208	7.92373e-14	7.95603e-13	0.193609
ENSG00000129197	RPAIN	-0.441371	7.93493e-14	7.9629e-13	0.0593616
ENSG00000152527	PLEKHH2	-2.83592	7.96466e-14	7.98833e-13	0.398157
ENSG00000242372	EIF6	0.654919	8.04031e-14	8.05977e-13	0.0890098
ENSG00000131127	ZNF141	-0.68497	8.05043e-14	8.06105e-13	0.0928003
ENSG00000164919	COX6C	-0.660679	8.0473e-14	8.06105e-13	0.0902604
ENSG00000067829	IDH3G	0.706033	8.13275e-14	8.13901e-13	0.0965031
ENSG00000161847	RAVER1	0.997028	8.22316e-14	8.22496e-13	0.136927
ENSG00000143554	SLC27A3	1.02186	8.52094e-14	8.51813e-13	0.141168
ENSG00000136908	DPM2	0.485319	8.58016e-14	8.57263e-13	0.0655857
ENSG00000176444	CLK2	0.334433	8.78401e-14	8.77149e-13	0.0448192
ENSG00000115282	TTC31	0.326454	8.88097e-14	8.86346e-13	0.0439112
ENSG00000213741	RPS29	-1.23712	9.23245e-14	9.20921e-13	0.171475
ENSG00000197021	EOLA2	0.350403	9.24029e-14	9.21199e-13	0.0472349
ENSG00000169733	RFNG	0.698214	9.30959e-14	9.27599e-13	0.0959513
ENSG00000025156	HSF2	-0.923669	9.43192e-14	9.39275e-13	0.126273
ENSG00000179364	PACS2	0.751348	9.49646e-14	9.45186e-13	0.103449
ENSG00000197355	UAP1L1	1.28345	9.52495e-14	9.47504e-13	0.182054
ENSG00000119414	PPP6C	-0.252395	9.5861e-14	9.53066e-13	0.0339109
ENSG00000083520	DIS3	-0.404077	9.64727e-14	9.58625e-13	0.0544148
ENSG00000165591	FAAH2	-2.61223	9.82312e-14	9.75567e-13	0.367471
ENSG00000143363	PRUNE1	-0.724454	9.86334e-14	9.78804e-13	0.0987852
ENSG00000250565	ATP6V1E2	-0.850861	9.87183e-14	9.78804e-13	0.116903
ENSG00000272398	CD24	-2.47647	9.87012e-14	9.78804e-13	0.347812
ENSG00000140382	HMG20A	-0.409579	9.90843e-14	9.81899e-13	0.0552923
ENSG00000187257	RSBN1L	-0.515922	1.00542e-13	9.95802e-13	0.0700441
ENSG00000002586	CD99	0.899468	1.00615e-13	9.95981e-13	0.125172
ENSG00000137166	FOXP4	1.48755	1.01949e-13	1.00864e-12	0.207812
ENSG00000167842	MIS12	-0.57563	1.02101e-13	1.0096e-12	0.0779884
ENSG00000162368	CMPK1	-0.514779	1.02542e-13	1.01341e-12	0.0697442
ENSG00000102054	RBBP7	-0.338596	1.03528e-13	1.0226e-12	0.0456946
ENSG00000196437	ZNF569	-1.04949	1.07432e-13	1.06058e-12	0.144801
ENSG00000196422	PPP1R26	1.3179	1.09711e-13	1.08249e-12	0.185463
ENSG00000127152	BCL11B	-1.4722	1.13902e-13	1.12324e-12	0.206749
ENSG00000117676	RPS6KA1	0.726273	1.14043e-13	1.12402e-12	0.10016
ENSG00000181649	PHLDA2	2.01848	1.15126e-13	1.13409e-12	0.282855
ENSG00000188266	HYKK	-2.8699	1.19424e-13	1.17579e-12	0.407948
ENSG00000076770	MBNL3	-0.936567	1.20257e-13	1.18335e-12	0.129758
ENSG00000204386	NEU1	0.774276	1.24722e-13	1.22662e-12	0.10803
ENSG00000164442	CITED2	0.962947	1.2608e-13	1.23931e-12	0.132176
ENSG00000086848	ALG9	-0.710174	1.27119e-13	1.24885e-12	0.0973896
ENSG00000187801	ZFP69B	-1.25868	1.27293e-13	1.24989e-12	0.174979
ENSG00000074266	EED	-0.436848	1.27554e-13	1.25177e-12	0.0595397
ENSG00000196214	ZNF766	-0.627557	1.27629e-13	1.25184e-12	0.0864308
ENSG00000139697	SBNO1	-0.39287	1.28457e-13	1.25928e-12	0.0532531
ENSG00000085644	ZNF213	0.85618	1.29435e-13	1.26819e-12	0.118046
ENSG00000155085	AK9	-0.792506	1.30173e-13	1.27473e-12	0.108546
ENSG00000158716	DUSP23	1.60888	1.30782e-13	1.28001e-12	0.234158
ENSG00000197958	RPL12	-0.906444	1.31958e-13	1.29082e-12	0.127125
ENSG00000196247	ZNF107	-1.08192	1.34395e-13	1.31396e-12	0.149789
ENSG00000141040	ZNF287	-1.08907	1.34637e-13	1.31562e-12	0.151449
ENSG00000115275	MOGS	0.374597	1.35184e-13	1.32025e-12	0.0510949
ENSG00000117519	CNN3	-1.99321	1.37678e-13	1.34389e-12	0.281069
ENSG00000080608	PUM3	-0.6431	1.5423e-13	1.50465e-12	0.0885475
ENSG00000101294	HM13	1.14215	1.56511e-13	1.52609e-12	0.160875
ENSG00000165655	ZNF503	2.16554	1.57537e-13	1.53527e-12	0.312193
ENSG00000213316	LTC4S	1.52327	1.58367e-13	1.54253e-12	0.21586
ENSG00000157800	SLC37A3	-0.914619	1.5912e-13	1.54904e-12	0.126449
ENSG00000166669	ATF7IP2	-0.974113	1.59762e-13	1.55446e-12	0.136667
ENSG00000117322	CR2	-2.64445	1.61076e-13	1.56641e-12	0.378325
ENSG00000176273	SLC35G1	-0.960378	1.6484e-13	1.60216e-12	0.13372
ENSG00000184216	IRAK1	1.69862	1.64947e-13	1.60234e-12	0.242595
ENSG00000076356	PLXNA2	1.10984	1.68716e-13	1.63808e-12	0.154889
ENSG00000184840	TMED9	0.763468	1.72274e-13	1.67174e-12	0.106325
ENSG00000184787	UBE2G2	-0.399503	1.7251e-13	1.67313e-12	0.0545058
ENSG00000171681	ATF7IP	-0.717012	1.8895e-13	1.83161e-12	0.0986678
ENSG00000125534	PPDPF	1.66163	1.92424e-13	1.86429e-12	0.235249
ENSG00000148832	PAOX	1.60863	1.99946e-13	1.93614e-12	0.22677
ENSG00000074842	MYDGF	1.22769	2.00488e-13	1.94036e-12	0.175293
ENSG00000229117	RPL41	-0.701683	2.03565e-13	1.96909e-12	0.0972216
ENSG00000086544	ITPKC	0.543468	2.05773e-13	1.9894e-12	0.0747671
ENSG00000161638	ITGA5	1.0242	2.07451e-13	2.00455e-12	0.143018
ENSG00000163975	MELTF	1.86814	2.087e-13	2.01555e-12	0.269447
ENSG00000169972	PUSL1	0.836101	2.12949e-13	2.0555e-12	0.116483
ENSG00000196365	LONP1	0.649018	2.14672e-13	2.07103e-12	0.0901369
ENSG00000014216	CAPN1	0.688026	2.15727e-13	2.08011e-12	0.0957497
ENSG00000151062	CACNA2D4	1.28979	2.21383e-13	2.13352e-12	0.181294
ENSG00000173540	GMPPB	0.93332	2.30735e-13	2.22248e-12	0.130572
ENSG00000155827	RNF20	-0.297379	2.34336e-13	2.25596e-12	0.0406907
ENSG00000204514	ZNF814	-0.950835	2.39469e-13	2.30416e-12	0.132338
ENSG00000066654	THUMPD1	-0.5596	2.43334e-13	2.34012e-12	0.0771452
ENSG00000115306	SPTBN1	-1.17963	2.43826e-13	2.34361e-12	0.166343
ENSG00000181830	SLC35C1	0.649714	2.46348e-13	2.3666e-12	0.0906518
ENSG00000106397	PLOD3	1.01499	2.46873e-13	2.37039e-12	0.14404
ENSG00000171475	WIPF2	0.407785	2.48553e-13	2.38527e-12	0.0559321
ENSG00000143393	PI4KB	0.282919	2.50578e-13	2.40344e-12	0.038684
ENSG00000170075	GPR37L1	1.99068	2.53606e-13	2.4312e-12	0.284203
ENSG00000196199	MPHOSPH8	-0.434032	2.5594e-13	2.45228e-12	0.0598415
ENSG00000156875	MFSD14A	1.00532	2.63386e-13	2.5223e-12	0.14099
ENSG00000088854	DNAAF9	0.846268	2.67846e-13	2.56232e-12	0.118446
ENSG00000119335	SET	-0.398519	2.67788e-13	2.56232e-12	0.0545424
ENSG00000021300	PLEKHB1	-1.7174	2.69912e-13	2.58073e-12	0.245278
ENSG00000101574	METTL4	-0.77003	2.70454e-13	2.58456e-12	0.106635
ENSG00000078674	PCM1	-0.563259	2.71902e-13	2.59589e-12	0.0785945
ENSG00000161914	ZNF653	0.780698	2.71925e-13	2.59589e-12	0.108992
ENSG00000112667	DNPH1	1.084	2.72501e-13	2.60003e-12	0.154028
ENSG00000162511	LAPTM5	0.980238	2.72928e-13	2.60274e-12	0.138052
ENSG00000254986	DPP3	0.493547	2.79293e-13	2.66204e-12	0.0681348
ENSG00000100038	TOP3B	1.11555	2.80747e-13	2.67451e-12	0.157244
ENSG00000087502	ERGIC2	-0.506288	2.84395e-13	2.70784e-12	0.0699057
ENSG00000105483	CARD8	-0.472267	2.84577e-13	2.70816e-12	0.0651229
ENSG00000181754	AMIGO1	-1.75389	2.85983e-13	2.72012e-12	0.250971
ENSG00000150625	GPM6A	-3.33856	2.91674e-13	2.77281e-12	0.477521
ENSG00000131188	PRR7	1.36057	2.99953e-13	2.85002e-12	0.193825
ENSG00000130713	EXOSC2	-0.677868	3.00794e-13	2.85652e-12	0.0941293
ENSG00000157593	SLC35B2	0.625899	3.03702e-13	2.88264e-12	0.0866537
ENSG00000105248	YJU2	0.577529	3.06139e-13	2.90423e-12	0.0799263
ENSG00000222009	BTBD19	1.63136	3.06295e-13	2.90423e-12	0.233851
ENSG00000062725	APPBP2	-0.392721	3.13477e-13	2.97078e-12	0.0542487
ENSG00000102871	TRADD	0.945165	3.13712e-13	2.97146e-12	0.133086
ENSG00000125166	GOT2	-0.587929	3.16427e-13	2.99562e-12	0.0816491
ENSG00000129460	NGDN	-0.484067	3.19466e-13	3.02282e-12	0.0667123
ENSG00000244486	SCARF2	1.30978	3.20966e-13	3.03544e-12	0.185548
ENSG00000164463	CREBRF	-0.69973	3.22389e-13	3.04731e-12	0.0973532
ENSG00000144218	AFF3	-1.93409	3.22839e-13	3.04998e-12	0.275335
ENSG00000159674	SPON2	1.49644	3.24135e-13	3.06064e-12	0.212381
ENSG00000171291	ZNF439	-1.4223	3.24391e-13	3.06147e-12	0.201859
ENSG00000198860	TSEN15	-0.607019	3.27303e-13	3.08736e-12	0.0843785
ENSG00000101181	MTG2	0.523003	3.43538e-13	3.23882e-12	0.0725433
ENSG00000147854	UHRF2	-0.666224	3.51944e-13	3.31635e-12	0.0920708
ENSG00000071127	WDR1	0.537973	3.53422e-13	3.32856e-12	0.0751386
ENSG00000240038	AMY2B	-1.2053	3.58422e-13	3.3739e-12	0.172588
ENSG00000031003	FAM13B	-0.382712	3.73209e-13	3.51128e-12	0.0529321
ENSG00000124459	ZNF45	-0.42889	3.74481e-13	3.52144e-12	0.0592964
ENSG00000137312	FLOT1	0.984784	3.76354e-13	3.53722e-12	0.139359
ENSG00000101109	STK4	-0.46071	3.77702e-13	3.54806e-12	0.0637251
ENSG00000168476	REEP4	1.02026	3.78095e-13	3.54992e-12	0.147576
ENSG00000004700	RECQL	-0.362877	3.7969e-13	3.56306e-12	0.0501644
ENSG00000128059	PPAT	-0.996866	3.82639e-13	3.58889e-12	0.140938
ENSG00000156162	DPY19L4	-0.593449	3.88054e-13	3.63781e-12	0.0826024
ENSG00000241127	YAE1	-0.646218	3.91176e-13	3.66519e-12	0.0903437
ENSG00000165630	PRPF18	-0.309783	3.91457e-13	3.66593e-12	0.0428258
ENSG00000175449	RFESD	-1.37611	3.91969e-13	3.66885e-12	0.195519
ENSG00000163006	CCDC138	-0.979691	3.93171e-13	3.67821e-12	0.138385
ENSG00000169435	RASSF6	-3.31371	3.97507e-13	3.71686e-12	0.49656
ENSG00000119318	RAD23B	0.581852	3.98357e-13	3.72199e-12	0.0805622
ENSG00000164880	INTS1	1.0039	3.98464e-13	3.72199e-12	0.1419
ENSG00000102245	CD40LG	-2.55887	4.0003e-13	3.73471e-12	0.369611
ENSG00000173114	LRRN3	-3.97159	4.0671e-13	3.79513e-12	0.582046
ENSG00000145604	SKP2	-0.665449	4.08161e-13	3.80672e-12	0.0928192
ENSG00000137076	TLN1	0.932074	4.12576e-13	3.84592e-12	0.131552
ENSG00000196781	TLE1	1.31689	4.14048e-13	3.85767e-12	0.187461
ENSG00000060558	GNA15	1.68236	4.18982e-13	3.90165e-12	0.240997
ENSG00000178093	TSSK6	0.796892	4.2148e-13	3.92291e-12	0.111683
ENSG00000117000	RLF	-0.491521	4.25155e-13	3.95509e-12	0.0682932
ENSG00000100629	CEP128	-0.785412	4.30121e-13	3.99924e-12	0.110831
ENSG00000266507	MIR4479	5.07491	4.31493e-13	4.00996e-12	0.844425
ENSG00000115325	DOK1	0.925936	4.34697e-13	4.03767e-12	0.132847
ENSG00000169951	ZNF764	0.594815	4.3827e-13	4.06879e-12	0.0831368
ENSG00000213859	KCTD11	0.934654	4.43572e-13	4.11591e-12	0.130553
ENSG00000155189	AGPAT5	-0.920835	4.45674e-13	4.13332e-12	0.130458
ENSG00000151881	TMEM267	-0.698929	4.46073e-13	4.13491e-12	0.0977573
ENSG00000172081	MOB3A	0.41281	4.48687e-13	4.15703e-12	0.0576019
ENSG00000175573	C11orf68	0.735042	4.54549e-13	4.2092e-12	0.103551
ENSG00000196290	NIF3L1	-0.439796	4.61189e-13	4.26851e-12	0.0613209
ENSG00000106628	POLD2	-0.570684	4.64324e-13	4.29535e-12	0.0798424
ENSG00000169635	HIC2	0.612923	4.66483e-13	4.31313e-12	0.0857714
ENSG00000146826	TRAPPC14	0.561273	4.84681e-13	4.47912e-12	0.0783617
ENSG00000203965	EFCAB7	-1.0892	4.85287e-13	4.48245e-12	0.154385
ENSG00000120253	NUP43	-0.536246	4.86356e-13	4.49005e-12	0.0749103
ENSG00000186166	CENATAC	-0.543691	4.98345e-13	4.5984e-12	0.0759505
ENSG00000173933	RBM4	-0.613564	5.02685e-13	4.6361e-12	0.0856891
ENSG00000015285	WAS	0.761792	5.0405e-13	4.64399e-12	0.106949
ENSG00000143952	VPS54	-0.384635	5.03854e-13	4.64399e-12	0.0534334
ENSG00000151332	MBIP	-0.542774	5.05594e-13	4.65585e-12	0.0758577
ENSG00000142541	RPL13A	-0.998902	5.07884e-13	4.67459e-12	0.142728
ENSG00000112144	CILK1	-0.567086	5.14015e-13	4.72863e-12	0.0793457
ENSG00000136286	MYO1G	1.75697	5.16724e-13	4.75115e-12	0.25331
ENSG00000130958	SLC35D2	0.750909	5.25428e-13	4.82874e-12	0.106176
ENSG00000137100	DCTN3	0.424909	5.38996e-13	4.95094e-12	0.0594649
ENSG00000196284	SUPT3H	-0.798218	5.39404e-13	4.95219e-12	0.112527
ENSG00000129675	ARHGEF6	-0.749594	5.47726e-13	5.02606e-12	0.106048
ENSG00000107521	HPS1	0.580883	5.48743e-13	5.03286e-12	0.0817993
ENSG00000070413	DGCR2	0.549616	5.57863e-13	5.11393e-12	0.0768213
ENSG00000107372	ZFAND5	0.622211	6.05678e-13	5.54946e-12	0.0873532
ENSG00000170955	CAVIN3	2.61606	6.10172e-13	5.58783e-12	0.386154
ENSG00000144736	SHQ1	-0.507114	6.21458e-13	5.68832e-12	0.0707794
ENSG00000100092	SH3BP1	1.0378	6.29549e-13	5.75949e-12	0.149209
ENSG00000146587	RBAK	-0.686976	6.30078e-13	5.76144e-12	0.0967796
ENSG00000155366	RHOC	1.12455	6.31211e-13	5.7689e-12	0.161507
ENSG00000057935	MTA3	-0.710638	6.36239e-13	5.80903e-12	0.100782
ENSG00000100156	SLC16A8	1.66648	6.36072e-13	5.80903e-12	0.241298
ENSG00000116205	TCEANC2	-0.521218	6.39485e-13	5.83574e-12	0.073081
ENSG00000100650	SRSF5	-0.43757	6.40619e-13	5.84024e-12	0.0612958
[truncated: 8,172 more rows]

## Sheet: TABLE_S5
Table S5. Differentially expressed genes in responder patients to fingolimod at baseline compared to healthy donors
Ensembl ID	Gene symbol	log2FC	pval	padj	lfcSE
ENSG00000228253	MT-ATP8	-3.30088	3.16486e-225	5.60909e-221	0.103129
ENSG00000101084	RAB5IF	3.44116	3.10939e-118	2.75538e-114	0.148308
ENSG00000130748	TMEM160	3.18207	1.30661e-113	7.71903e-110	0.143151
ENSG00000272325	NUDT3	3.95756	1.11293e-55	4.93112e-52	0.259139
ENSG00000102931	ARL2BP	4.15638	3.62795e-51	1.28596e-47	0.282574
ENSG00000243449	C4orf48	3.94981	3.06468e-50	9.05254e-47	0.279129
ENSG00000088766	CRLS1	1.98348	5.96752e-50	1.51089e-46	0.136148
ENSG00000167136	ENDOG	3.47954	6.39197e-47	1.41606e-43	0.243911
ENSG00000141933	TPGS1	1.87421	1.68338e-45	3.31494e-42	0.135299
ENSG00000168350	DEGS2	2.71223	6.57201e-41	1.16476e-37	0.204771
ENSG00000135766	EGLN1	2.24266	6.52395e-40	1.05113e-36	0.171118
ENSG00000179965	ZNF771	1.77052	2.08129e-39	3.07389e-36	0.137154
ENSG00000241360	PDXP	3.50735	4.79981e-37	6.54362e-34	0.282082
ENSG00000168040	FADD	2.67421	7.507e-35	9.50333e-32	0.225654
ENSG00000176022	B3GALT6	1.22343	4.47224e-34	5.2841e-31	0.102991
ENSG00000142544	CTU1	2.53379	5.04869e-34	5.59237e-31	0.211522
ENSG00000107872	FBXL15	2.19734	4.9576e-32	5.16845e-29	0.192585
ENSG00000181588	MEX3D	1.71709	8.10666e-32	7.98191e-29	0.150667
ENSG00000271303	SRXN1	6.03355	1.21808e-31	1.13621e-28	0.51518
ENSG00000143337	TOR1AIP1	-0.511777	1.75056e-31	1.55126e-28	0.0444081
ENSG00000250479	CHCHD10	2.12112	4.63763e-31	3.91394e-28	0.192369
ENSG00000111775	COX6A1	-1.02714	2.68189e-30	2.16051e-27	0.0919825
ENSG00000141873	SLC39A3	0.978785	2.04364e-29	1.57476e-26	0.0885143
ENSG00000130522	JUND	1.69032	6.79933e-29	5.02102e-26	0.154986
ENSG00000161956	SENP3	0.830915	7.36562e-29	5.22163e-26	0.0760513
ENSG00000182325	FBXL6	1.10368	7.95732e-29	5.22325e-26	0.100848
ENSG00000239857	GET4	2.00936	7.67472e-29	5.22325e-26	0.185087
ENSG00000099624	ATP5F1D	1.65368	4.03519e-28	2.55413e-25	0.15544
ENSG00000117859	OSBPL9	-0.486659	1.83074e-27	1.11883e-24	0.0454523
ENSG00000196976	LAGE3	1.18	1.79192e-26	1.05861e-23	0.113937
ENSG00000182154	MRPL41	1.88433	3.1483e-26	1.79991e-23	0.182728
ENSG00000103495	MAZ	0.92625	3.31093e-26	1.83374e-23	0.0902122
ENSG00000213563	C8orf82	1.42364	3.71654e-26	1.99601e-23	0.13707
ENSG00000233493	TMEM238	3.52447	4.22129e-26	2.20041e-23	0.350606
ENSG00000260428	SCX	3.02725	9.24959e-26	4.68373e-23	0.305263
ENSG00000179922	ZNF784	0.959762	1.11699e-25	5.49902e-23	0.0936175
ENSG00000147804	SLC39A4	1.48208	1.45863e-25	6.98685e-23	0.145028
ENSG00000166337	TAF10	0.9344	2.0975e-25	9.78261e-23	0.091763
ENSG00000161999	JMJD8	1.10158	3.72868e-25	1.69445e-22	0.109615
ENSG00000179271	GADD45GIP1	1.34127	1.17976e-24	5.22721e-22	0.135911
ENSG00000161179	YDJC	1.53942	1.63805e-24	7.08077e-22	0.156828
ENSG00000103266	STUB1	1.55531	1.74756e-24	7.37429e-22	0.157207
ENSG00000261221	ZNF865	2.09529	2.65395e-24	1.09386e-21	0.212643
ENSG00000127554	GFER	1.14893	2.83674e-24	1.14262e-21	0.116546
ENSG00000113141	IK	-0.367113	3.60063e-24	1.41809e-21	0.0364511
ENSG00000218891	ZNF579	1.95899	4.86225e-24	1.87334e-21	0.196682
ENSG00000141759	TXNL4A	0.481738	7.1566e-24	2.69865e-21	0.0486755
ENSG00000177666	PNPLA2	1.03369	8.13203e-24	3.00258e-21	0.105337
ENSG00000167996	FTH1	2.457	1.63683e-23	5.9203e-21	0.249234
ENSG00000131116	ZNF428	1.69426	2.11983e-23	7.51395e-21	0.175806
ENSG00000188486	H2AX	1.44419	4.15786e-23	1.4449e-20	0.151447
ENSG00000172216	CEBPB	2.30925	1.33552e-22	4.55182e-20	0.239792
ENSG00000130725	UBE2M	0.83392	1.3891e-22	4.64511e-20	0.0870874
ENSG00000140406	TLNRD1	1.54179	1.49631e-22	4.91096e-20	0.161841
ENSG00000168288	MMADHC	-0.471001	2.69738e-22	8.69193e-20	0.0492557
ENSG00000126453	BCL2L12	0.727698	4.99318e-22	1.58025e-19	0.0769871
ENSG00000105464	GRIN2D	1.67579	9.98271e-22	3.10392e-19	0.180606
ENSG00000224877	NDUFAF8	1.17425	1.04073e-21	3.18015e-19	0.127368
ENSG00000161682	FAM171A2	2.84508	2.97124e-21	8.9253e-19	0.309363
ENSG00000117983	MUC5B	1.75621	4.94751e-21	1.46141e-18	0.191424
ENSG00000169230	PRELID1	1.12041	5.68366e-21	1.65134e-18	0.123865
ENSG00000172780	RAB43	2.51303	6.05566e-21	1.73104e-18	0.273028
ENSG00000220008	LINGO3	2.55915	7.89818e-21	2.2219e-18	0.282666
ENSG00000169228	RAB24	1.46542	8.99615e-21	2.49123e-18	0.160338
ENSG00000182768	NGRN	1.30746	1.46187e-20	3.98596e-18	0.14632
ENSG00000186298	PPP1CC	-0.370136	1.8203e-20	4.88806e-18	0.0406045
ENSG00000184207	PGP	0.892242	2.10726e-20	5.57417e-18	0.0996899
ENSG00000175756	AURKAIP1	1.16101	2.26096e-20	5.89281e-18	0.130875
ENSG00000103254	ANTKMT	2.27838	2.38651e-20	6.12986e-18	0.26141
ENSG00000104859	CLASRP	0.765157	2.83968e-20	7.18967e-18	0.0850573
ENSG00000197150	ABCB8	0.55417	3.6038e-20	8.99579e-18	0.0612697
ENSG00000205903	ZNF316	1.08413	6.11769e-20	1.50589e-17	0.123263
ENSG00000169131	ZNF354A	-0.645735	1.00998e-19	2.45204e-17	0.0723162
ENSG00000104325	DECR1	-0.563727	1.13702e-19	2.72315e-17	0.0633862
ENSG00000185262	UBALD2	1.37159	1.46029e-19	3.45076e-17	0.155252
ENSG00000126895	AVPR2	1.62571	1.48862e-19	3.47143e-17	0.187363
ENSG00000284286	MIR718	9.9382	2.10363e-19	4.84189e-17	2.84596
ENSG00000007520	TSR3	1.20547	2.20282e-19	5.00519e-17	0.139651
ENSG00000159884	CCDC107	2.31541	2.44338e-19	5.48153e-17	0.268994
ENSG00000284015	MIR1281	4.30293	4.68582e-19	1.03809e-16	0.489006
ENSG00000213638	ADAT3	2.49461	6.45674e-19	1.41275e-16	0.299028
ENSG00000182149	IST1	-0.26311	7.75032e-19	1.67511e-16	0.0298415
ENSG00000165644	COMTD1	1.83384	7.9993e-19	1.70809e-16	0.216011
ENSG00000088930	XRN2	-0.439918	9.73186e-19	2.05331e-16	0.0503385
ENSG00000118007	STAG1	-0.506698	1.10448e-18	2.30291e-16	0.0583941
ENSG00000139725	RHOF	2.62415	1.25121e-18	2.5785e-16	0.313851
ENSG00000065559	MAP2K4	-0.455415	1.82455e-18	3.71683e-16	0.0526118
ENSG00000182512	GLRX5	0.577135	2.21894e-18	4.46889e-16	0.0674868
ENSG00000173153	ESRRA	1.1525	3.09044e-18	6.15415e-16	0.138194
ENSG00000177733	HNRNPA0	0.618018	3.56804e-18	7.02626e-16	0.0733105
ENSG00000164754	RAD21	-0.390188	4.29183e-18	8.3587e-16	0.0454389
ENSG00000142409	ZNF787	1.63152	4.55492e-18	8.77466e-16	0.198945
ENSG00000258429	PDF	4.54208	4.98938e-18	9.50826e-16	0.554417
ENSG00000174943	KCTD13	0.588102	6.78436e-18	1.27914e-15	0.069749
ENSG00000179085	DPM3	1.32469	7.02903e-18	1.31132e-15	0.161886
ENSG00000168282	MGAT2	2.55405	8.38944e-18	1.54881e-15	0.31511
ENSG00000123144	TRIR	0.975792	8.54711e-18	1.56165e-15	0.117851
ENSG00000079246	XRCC5	-0.440561	1.00099e-17	1.81026e-15	0.052342
ENSG00000155508	CNOT8	-0.369955	1.37664e-17	2.46001e-15	0.0439256
ENSG00000178297	TMPRSS9	1.83549	1.38804e-17	2.46001e-15	0.226065
ENSG00000104866	PPP1R37	1.25685	1.4882e-17	2.61141e-15	0.153143
ENSG00000128789	PSMG2	-0.327657	1.7682e-17	3.07233e-15	0.0389197
ENSG00000160813	PPP1R35	1.76697	2.74161e-17	4.71744e-15	0.218395
ENSG00000146834	MEPCE	1.23429	3.82176e-17	6.51279e-15	0.152629
ENSG00000106028	SSBP1	-0.500686	3.96881e-17	6.69897e-15	0.0611003
ENSG00000257704	INAFM1	1.59034	4.43416e-17	7.41383e-15	0.196989
ENSG00000167394	ZNF668	1.06224	4.97599e-17	8.242e-15	0.130246
ENSG00000135164	DMTF1	-0.507579	5.26245e-17	8.63577e-15	0.0608279
ENSG00000063169	BICRA	1.17592	6.14217e-17	9.98694e-15	0.144933
ENSG00000178015	GPR150	1.68923	6.2685e-17	1.00997e-14	0.209398
ENSG00000075292	ZNF638	-0.544239	6.54278e-17	1.02617e-14	0.0662615
ENSG00000115266	APC2	1.17125	6.5272e-17	1.02617e-14	0.145068
ENSG00000116014	KISS1R	3.41951	6.47744e-17	1.02617e-14	0.428524
ENSG00000188986	NELFB	0.662618	1.31325e-16	2.04164e-14	0.0819284
ENSG00000116685	KIAA2013	0.709358	1.37478e-16	2.11871e-14	0.0882358
ENSG00000083642	PDS5B	-0.506146	1.56377e-16	2.3892e-14	0.0625971
ENSG00000185000	DGAT1	0.782496	1.63286e-16	2.47343e-14	0.0984248
ENSG00000130511	SSBP4	1.59251	1.89174e-16	2.84129e-14	0.202771
ENSG00000162959	MEMO1	1.25551	2.42076e-16	3.6053e-14	0.158341
ENSG00000126254	RBM42	0.950447	2.99246e-16	4.41962e-14	0.121409
ENSG00000239264	TXNDC5	3.21314	3.05983e-16	4.48177e-14	0.404596
ENSG00000126461	SCAF1	1.26136	3.1499e-16	4.55196e-14	0.159899
ENSG00000176619	LMNB2	0.884107	3.15912e-16	4.55196e-14	0.112534
ENSG00000136463	TACO1	1.28646	3.32284e-16	4.74925e-14	0.164792
ENSG00000185950	IRS2	1.10759	3.43696e-16	4.87306e-14	0.140179
ENSG00000105662	CRTC1	0.827787	3.54071e-16	4.98032e-14	0.104563
ENSG00000176182	MYPOP	1.29135	3.94382e-16	5.50365e-14	0.163181
ENSG00000036257	CUL3	-0.408173	4.37762e-16	6.06129e-14	0.0510861
ENSG00000112787	FBRSL1	1.37315	4.43121e-16	6.08794e-14	0.177915
ENSG00000164190	NIPBL	-0.446965	5.0469e-16	6.88048e-14	0.0562441
ENSG00000186352	ANKRD37	1.31846	5.21787e-16	7.05926e-14	0.168985
ENSG00000167642	SPINT2	1.3711	6.46267e-16	8.67712e-14	0.177946
ENSG00000178951	ZBTB7A	1.21029	7.3509e-16	9.79549e-14	0.158719
ENSG00000146282	RARS2	-0.449555	7.41544e-16	9.80775e-14	0.0567736
ENSG00000011304	PTBP1	0.571718	7.76895e-16	1.01992e-13	0.073516
ENSG00000186222	BLOC1S4	0.855127	8.67748e-16	1.13082e-13	0.110069
ENSG00000102109	PCSK1N	3.20127	9.18573e-16	1.18831e-13	0.424287
ENSG00000104983	CCDC61	1.01725	1.02224e-15	1.31284e-13	0.130919
ENSG00000133250	ZNF414	1.5052	1.40435e-15	1.7906e-13	0.197786
ENSG00000114631	PODXL2	1.3097	1.70278e-15	2.1556e-13	0.173388
ENSG00000123395	ATG101	0.853812	1.86279e-15	2.32494e-13	0.111982
ENSG00000179832	MROH1	0.882424	1.85072e-15	2.32494e-13	0.114878
ENSG00000103275	UBE2I	0.45708	2.2571e-15	2.79738e-13	0.0589526
ENSG00000112659	CUL9	0.513714	2.35351e-15	2.89662e-13	0.0658544
ENSG00000172922	RNASEH2C	0.734135	2.43372e-15	2.97468e-13	0.095918
ENSG00000243147	MRPL33	-0.631197	2.61309e-15	3.17204e-13	0.0826173
ENSG00000136628	EPRS1	-0.47362	2.96805e-15	3.57842e-13	0.0613632
ENSG00000127445	PIN1	0.747746	3.3263e-15	3.98324e-13	0.0981151
ENSG00000158290	CUL4B	-0.461645	3.44998e-15	4.10362e-13	0.0596097
ENSG00000119203	CPSF3	-0.52448	3.49271e-15	4.12675e-13	0.0682131
ENSG00000171222	SCAND1	1.57214	4.18217e-15	4.90865e-13	0.211013
ENSG00000197961	ZNF121	-0.643662	4.30472e-15	5.01925e-13	0.0846094
ENSG00000143793	C1orf35	1.2475	4.74112e-15	5.49195e-13	0.167006
ENSG00000125912	NCLN	1.00807	4.88402e-15	5.62074e-13	0.133995
ENSG00000178761	FAM219B	0.581378	4.98101e-15	5.69538e-13	0.0760713
ENSG00000100603	SNW1	-0.40608	6.18571e-15	7.02753e-13	0.0529738
ENSG00000164620	RELL2	1.19872	7.44841e-15	8.40816e-13	0.159669
ENSG00000205155	PSENEN	-0.835325	7.49598e-15	8.40831e-13	0.111426
ENSG00000165804	ZNF219	1.67025	7.84399e-15	8.74333e-13	0.222805
ENSG00000136877	FPGS	0.699985	8.04602e-15	8.91248e-13	0.0927169
ENSG00000109180	OCIAD1	-0.419299	8.57652e-15	9.4411e-13	0.0550083
ENSG00000071626	DAZAP1	0.641966	8.7887e-15	9.612e-13	0.0848561
ENSG00000205078	SYCE1L	1.20709	8.84024e-15	9.612e-13	0.163454
ENSG00000198862	LTN1	-0.436273	9.94118e-15	1.07431e-12	0.0571705
ENSG00000205138	SDHAF1	0.908981	1.06397e-14	1.14283e-12	0.122668
ENSG00000006015	REX1BD	1.49478	1.07821e-14	1.15115e-12	0.205743
ENSG00000103978	TMEM87A	-0.531697	1.1846e-14	1.24969e-12	0.0710223
ENSG00000106052	TAX1BP1	-0.522026	1.1815e-14	1.24969e-12	0.0696776
ENSG00000184897	H1-10	1.86941	1.2478e-14	1.30856e-12	0.249659
ENSG00000163795	ZNF513	0.551536	1.40006e-14	1.45961e-12	0.0734399
ENSG00000167969	ECI1	0.95538	1.59401e-14	1.65208e-12	0.129455
ENSG00000162585	FAAP20	0.858581	1.63868e-14	1.67875e-12	0.116658
ENSG00000178026	LRRC75B	1.16322	1.63239e-14	1.67875e-12	0.159111
ENSG00000178149	DALRD3	0.844014	1.83084e-14	1.86483e-12	0.114209
ENSG00000121741	ZMYM2	-0.551674	1.94051e-14	1.94633e-12	0.0742439
ENSG00000170468	RIOX1	0.705009	1.94225e-14	1.94633e-12	0.0955988
ENSG00000187037	GPR141	-1.06083	1.94662e-14	1.94633e-12	0.144837
ENSG00000188483	IER5L	2.89454	1.95478e-14	1.94633e-12	0.420616
ENSG00000099364	FBXL19	1.15519	2.14006e-14	2.10989e-12	0.15663
ENSG00000182095	TNRC18	1.15495	2.14287e-14	2.10989e-12	0.156594
ENSG00000147601	TERF1	-0.41963	2.26754e-14	2.22031e-12	0.0556894
ENSG00000114416	FXR1	-0.369363	2.4371e-14	2.37322e-12	0.0492635
ENSG00000196757	ZNF700	-0.583033	3.02246e-14	2.92716e-12	0.0794047
ENSG00000163702	IL17RC	2.19178	3.46172e-14	3.33435e-12	0.303347
ENSG00000139266	MARCHF9	0.755602	3.55399e-14	3.40472e-12	0.102554
ENSG00000182087	TMEM259	1.09202	3.64732e-14	3.47534e-12	0.15156
ENSG00000284194	SCO2	3.47309	3.94312e-14	3.73711e-12	0.467144
ENSG00000169564	PCBP1	1.67744	4.06536e-14	3.83247e-12	0.231963
ENSG00000167302	TEPSIN	0.576548	4.24753e-14	3.98302e-12	0.0783536
ENSG00000129932	DOHH	1.3981	4.8331e-14	4.50826e-12	0.195797
ENSG00000125652	ALKBH7	1.51907	4.92319e-14	4.56826e-12	0.216938
ENSG00000105472	CLEC11A	2.11962	5.80975e-14	5.36282e-12	0.30036
ENSG00000105229	PIAS4	0.965213	6.42569e-14	5.90065e-12	0.133768
ENSG00000173137	ADCK5	0.975613	7.07025e-14	6.45907e-12	0.135893
ENSG00000162227	TAF6L	0.549317	7.60877e-14	6.9154e-12	0.0756572
ENSG00000188375	H3-5	-1.55413	7.82484e-14	7.07549e-12	0.220467
ENSG00000197483	ZNF628	1.70075	8.99545e-14	8.09271e-12	0.238965
ENSG00000105607	GCDH	0.671082	9.20956e-14	8.24349e-12	0.0931673
ENSG00000116544	DLGAP3	1.88402	9.48628e-14	8.44851e-12	0.270083
ENSG00000118564	FBXL5	-0.507701	9.69947e-14	8.55242e-12	0.0701215
ENSG00000173511	VEGFB	0.682145	9.65702e-14	8.55242e-12	0.0952636
ENSG00000225828	FAM229A	1.10222	9.79443e-14	8.5934e-12	0.154969
ENSG00000136536	MARCHF7	-0.428387	1.01904e-13	8.89678e-12	0.0587943
ENSG00000047188	YTHDC2	-0.353708	1.19269e-13	1.03618e-11	0.0486338
ENSG00000008323	PLEKHG6	1.80156	1.23977e-13	1.07182e-11	0.251579
ENSG00000031003	FAM13B	-0.494484	1.26691e-13	1.08997e-11	0.0683981
ENSG00000167700	MFSD3	1.39339	1.30472e-13	1.11708e-11	0.199828
ENSG00000157870	PRXL2B	0.800699	1.33612e-13	1.13847e-11	0.114487
ENSG00000164944	VIRMA	-0.509193	1.43458e-13	1.21651e-11	0.070891
ENSG00000189227	C15orf61	1.04451	1.5124e-13	1.27639e-11	0.146629
ENSG00000120733	KDM3B	-0.228399	1.55732e-13	1.30807e-11	0.0310371
ENSG00000063245	EPN1	0.972414	1.84988e-13	1.54648e-11	0.138183
ENSG00000178950	GAK	0.676662	1.89397e-13	1.5759e-11	0.0949081
ENSG00000163714	U2SURP	-0.372017	1.94333e-13	1.60942e-11	0.0519417
ENSG00000141582	CBX4	1.13973	2.17012e-13	1.78889e-11	0.162375
ENSG00000102241	HTATSF1	-0.407661	2.39537e-13	1.96542e-11	0.0568738
ENSG00000125107	CNOT1	-0.390537	2.47778e-13	2.02367e-11	0.0540348
ENSG00000090382	LYZ	-1.41705	2.52176e-13	2.05015e-11	0.207462
ENSG00000171443	ZNF524	1.30919	2.63224e-13	2.13019e-11	0.189259
ENSG00000187555	USP7	-0.341988	2.68242e-13	2.16093e-11	0.0482005
ENSG00000284395	PERCC1	2.08611	2.85431e-13	2.289e-11	0.30232
ENSG00000161904	LEMD2	0.48729	2.87037e-13	2.29151e-11	0.0683281
ENSG00000174586	ZNF497	1.73719	2.91167e-13	2.31406e-11	0.24952
ENSG00000136937	NCBP1	-0.317038	3.07307e-13	2.43143e-11	0.0440485
ENSG00000175602	CCDC85B	2.78605	3.52662e-13	2.77788e-11	0.414804
ENSG00000139726	DENR	-0.335011	3.79372e-13	2.97505e-11	0.0466882
ENSG00000175482	POLD4	0.61508	3.94573e-13	3.08063e-11	0.0875744
ENSG00000072501	SMC1A	-0.299267	4.00208e-13	3.11091e-11	0.0416276
ENSG00000168061	SAC3D1	1.19033	4.37943e-13	3.38937e-11	0.170778
ENSG00000197976	AKAP17A	0.761181	4.87873e-13	3.75938e-11	0.108988
ENSG00000021776	AQR	-0.52072	4.94997e-13	3.79776e-11	0.0734591
ENSG00000174775	HRAS	0.854604	5.15896e-13	3.94104e-11	0.12398
ENSG00000039650	PNKP	0.604287	5.32223e-13	4.03102e-11	0.0861887
ENSG00000166747	AP1G1	-0.533578	5.31051e-13	4.03102e-11	0.0763581
ENSG00000241837	ATP5PO	-0.645144	5.76466e-13	4.34753e-11	0.0933422
ENSG00000172795	DCP2	-0.503865	5.99878e-13	4.50493e-11	0.0724487
ENSG00000104885	DOT1L	1.3531	6.41443e-13	4.79675e-11	0.197075
ENSG00000160972	PPP1R16A	1.52111	6.4776e-13	4.80345e-11	0.22023
ENSG00000198924	DCLRE1A	-0.750208	6.46326e-13	4.80345e-11	0.109286
ENSG00000127616	SMARCA4	0.434098	6.579e-13	4.84036e-11	0.0613203
ENSG00000160113	NR2F6	1.68481	6.58199e-13	4.84036e-11	0.248029
ENSG00000178093	TSSK6	1.04118	6.70937e-13	4.91365e-11	0.152161
ENSG00000088247	KHSRP	0.638829	6.94758e-13	5.06716e-11	0.0924228
ENSG00000112667	DNPH1	1.40289	7.02737e-13	5.10435e-11	0.211852
ENSG00000026036	RTEL1-TNFRSF6B	0.918654	7.13178e-13	5.15904e-11	0.13531
ENSG00000179168	GGN	1.79132	7.66281e-13	5.52065e-11	0.266474
ENSG00000270170	NCBP2AS2	0.78044	7.827e-13	5.61611e-11	0.114775
ENSG00000116030	SUMO1	-0.522267	7.94511e-13	5.67787e-11	0.0751833
ENSG00000125656	CLPP	0.821058	8.15126e-13	5.8018e-11	0.119921
ENSG00000188070	ZFTA	0.921316	8.25784e-13	5.83083e-11	0.133846
ENSG00000261308	FIGNL2	2.41248	8.24283e-13	5.83083e-11	0.356973
ENSG00000276045	ORAI1	0.665374	8.71382e-13	6.12838e-11	0.096763
ENSG00000081721	DUSP12	-0.590454	8.85887e-13	6.20576e-11	0.0855878
ENSG00000075407	ZNF37A	-0.488243	9.89846e-13	6.90671e-11	0.0701515
ENSG00000158417	EIF5B	-0.536394	1.1134e-12	7.73835e-11	0.0780843
ENSG00000152518	ZFP36L2	1.29567	1.12693e-12	7.80182e-11	0.189875
ENSG00000111087	GLI1	1.25902	1.14558e-12	7.90001e-11	0.184583
ENSG00000160087	UBE2J2	0.653099	1.19209e-12	8.18895e-11	0.0953889
ENSG00000137947	GTF2B	-0.672449	1.19693e-12	8.1904e-11	0.0988155
ENSG00000105856	HBP1	-0.561776	1.22375e-12	8.34175e-11	0.0816326
ENSG00000162302	RPS6KA4	0.934801	1.29436e-12	8.78926e-11	0.138487
ENSG00000130520	LSM4	0.532493	1.31014e-12	8.86242e-11	0.0776653
ENSG00000083535	PIBF1	-0.507332	1.38355e-12	9.2883e-11	0.0735824
ENSG00000123200	ZC3H13	-0.432648	1.38358e-12	9.2883e-11	0.0620696
ENSG00000198522	GPN1	-0.514143	1.42666e-12	9.54142e-11	0.0750469
ENSG00000119414	PPP6C	-0.302182	1.43379e-12	9.55303e-11	0.0431778
ENSG00000105698	USF2	0.859916	1.48574e-12	9.82526e-11	0.126878
ENSG00000173338	KCNK7	1.42419	1.48149e-12	9.82526e-11	0.214523
ENSG00000135940	COX5B	0.742599	1.49956e-12	9.87983e-11	0.110846
ENSG00000128585	MKLN1	-0.512801	1.53037e-12	1.00455e-10	0.0742189
ENSG00000125817	CENPB	0.780533	1.66286e-12	1.08749e-10	0.116698
ENSG00000148832	PAOX	1.94852	1.67678e-12	1.09256e-10	0.287162
ENSG00000131584	ACAP3	0.963524	1.76247e-12	1.1402e-10	0.143076
ENSG00000178605	GTPBP6	0.8999	1.76276e-12	1.1402e-10	0.133677
ENSG00000100075	SLC25A1	0.877901	1.81145e-12	1.16244e-10	0.130096
ENSG00000117000	RLF	-0.548046	1.80811e-12	1.16244e-10	0.0796202
ENSG00000221821	C6orf226	0.983083	1.81683e-12	1.16244e-10	0.147468
ENSG00000182979	MTA1	0.966043	1.87612e-12	1.19606e-10	0.143467
ENSG00000103150	MLYCD	0.605274	1.96404e-12	1.24762e-10	0.0887233
ENSG00000141577	CEP131	1.01223	2.22544e-12	1.40863e-10	0.152494
ENSG00000119673	ACOT2	1.15358	2.37535e-12	1.49816e-10	0.172162
ENSG00000159917	ZNF235	-0.398365	2.5261e-12	1.58759e-10	0.0580391
ENSG00000082068	WDR70	-0.425319	2.55611e-12	1.60078e-10	0.0623027
ENSG00000104064	GABPB1	-0.607572	2.67961e-12	1.67221e-10	0.0901448
ENSG00000065000	AP3D1	0.508706	2.7213e-12	1.69227e-10	0.0749007
ENSG00000171813	PWWP2B	1.29063	2.84831e-12	1.76506e-10	0.197342
ENSG00000179846	NKPD1	1.44741	2.92872e-12	1.80856e-10	0.21782
ENSG00000006125	AP2B1	-0.334667	3.01801e-12	1.85723e-10	0.0493172
ENSG00000131188	PRR7	2.05193	3.23602e-12	1.9845e-10	0.318195
ENSG00000128513	POT1	-0.533276	3.51804e-12	2.15001e-10	0.0788702
ENSG00000100519	PSMC6	-0.31356	3.87789e-12	2.36178e-10	0.0462111
ENSG00000118046	STK11	1.04861	4.09603e-12	2.48609e-10	0.160202
ENSG00000090060	PAPOLA	-0.395687	4.14987e-12	2.50281e-10	0.0579189
ENSG00000160226	CFAP410	1.0443	4.15181e-12	2.50281e-10	0.160939
ENSG00000183971	NPW	3.37506	4.22618e-12	2.539e-10	0.532395
ENSG00000179698	WDR97	1.18343	4.30037e-12	2.57484e-10	0.180977
ENSG00000176125	UFSP1	1.63621	4.38612e-12	2.61735e-10	0.249855
ENSG00000197343	ZNF655	-0.419977	4.64141e-12	2.76039e-10	0.0618091
ENSG00000127528	KLF2	1.88968	4.97738e-12	2.95031e-10	0.28586
ENSG00000181218	H2AC25	1.16744	5.20578e-12	3.0754e-10	0.179196
ENSG00000167733	HSD11B1L	1.01199	5.3573e-12	3.1544e-10	0.153534
ENSG00000087302	RTRAF	-0.366217	5.56041e-12	3.25245e-10	0.0547569
ENSG00000170265	ZNF282	0.673301	5.56053e-12	3.25245e-10	0.101316
ENSG00000146826	TRAPPC14	0.903843	5.57962e-12	3.25288e-10	0.137082
ENSG00000163655	GMPS	-0.301048	5.95164e-12	3.45839e-10	0.0443535
ENSG00000130545	CRB3	1.29027	6.52295e-12	3.77798e-10	0.197957
ENSG00000163605	PPP4R2	-0.423791	6.6342e-12	3.8299e-10	0.0635322
ENSG00000198763	MT-ND2	-0.715452	6.97873e-12	4.01572e-10	0.109101
ENSG00000029364	SLC39A9	-0.495435	7.41023e-12	4.25021e-10	0.0748941
ENSG00000132005	RFX1	1.15637	7.5905e-12	4.33956e-10	0.177313
ENSG00000172366	MCRIP2	1.12244	7.62815e-12	4.34707e-10	0.175509
ENSG00000176101	SSNA1	0.667877	7.73779e-12	4.39541e-10	0.102497
ENSG00000160256	SLX9	1.14431	8.14751e-12	4.61337e-10	0.177193
ENSG00000177189	RPS6KA3	-0.416683	8.65636e-12	4.88588e-10	0.0623061
ENSG00000196428	TSC22D2	0.404555	9.02976e-12	5.08046e-10	0.0603168
ENSG00000141503	MINK1	0.568471	9.35275e-12	5.24553e-10	0.0865477
ENSG00000213015	ZNF580	0.704152	9.90813e-12	5.53949e-10	0.108209
ENSG00000169696	ASPSCR1	0.761132	1.07479e-11	5.99009e-10	0.117306
ENSG00000101940	WDR13	0.601689	1.09179e-11	6.06575e-10	0.0916625
ENSG00000078618	NRDC	-0.523663	1.11228e-11	6.14817e-10	0.0789639
ENSG00000129911	KLF16	1.1569	1.11356e-11	6.14817e-10	0.183323
ENSG00000105708	ZNF14	-0.683962	1.14098e-11	6.28e-10	0.10587
ENSG00000079134	THOC1	-0.393218	1.20091e-11	6.58939e-10	0.0596344
ENSG00000152942	RAD17	-0.497143	1.24328e-11	6.79897e-10	0.0755039
ENSG00000197579	TOPORS	-0.46241	1.24678e-11	6.79897e-10	0.0697992
ENSG00000168569	TMEM223	0.73536	1.28147e-11	6.96669e-10	0.113893
ENSG00000116871	MAP7D1	0.906776	1.31052e-11	7.10286e-10	0.139916
ENSG00000177732	SOX12	1.28988	1.34699e-11	7.27826e-10	0.203753
ENSG00000077454	LRCH4	0.79147	1.35356e-11	7.29153e-10	0.122531
ENSG00000167657	DAPK3	0.792181	1.36257e-11	7.31785e-10	0.121563
ENSG00000116032	GRIN3B	2.37528	1.42103e-11	7.60876e-10	0.39719
ENSG00000153975	ZUP1	-0.538494	1.53796e-11	8.21003e-10	0.0831312
ENSG00000179862	CITED4	1.90443	1.55296e-11	8.2652e-10	0.303822
ENSG00000177225	GATD1	0.576892	1.60918e-11	8.53878e-10	0.0888769
ENSG00000127415	IDUA	1.43717	1.71783e-11	9.08807e-10	0.229499
ENSG00000009307	CSDE1	-0.392231	1.82317e-11	9.61667e-10	0.0600139
ENSG00000173080	RXFP4	2.95231	1.83138e-11	9.63133e-10	0.450625
ENSG00000116906	GNPAT	-0.423749	1.89978e-11	9.96146e-10	0.0643992
ENSG00000139697	SBNO1	-0.386146	1.92375e-11	1.00574e-09	0.0582604
ENSG00000142235	LMTK3	1.21602	1.97369e-11	1.02881e-09	0.192329
ENSG00000104960	PTOV1	0.667726	2.1049e-11	1.09168e-09	0.103443
ENSG00000137776	SLTM	-0.295792	2.10662e-11	1.09168e-09	0.044569
ENSG00000126214	KLC1	0.461308	2.11646e-11	1.09359e-09	0.0703279
ENSG00000123989	CHPF	1.20067	2.14412e-11	1.10466e-09	0.188318
ENSG00000134419	RPS15A	-0.926464	2.17321e-11	1.1164e-09	0.148646
ENSG00000160949	TONSL	1.04819	2.31048e-11	1.18349e-09	0.166102
ENSG00000119328	ABITRAM	-0.491844	2.38918e-11	1.22027e-09	0.0761896
ENSG00000004700	RECQL	-0.414353	2.43293e-11	1.23905e-09	0.0635666
ENSG00000138592	USP8	-0.356699	2.4536e-11	1.24405e-09	0.0543052
ENSG00000166181	API5	-0.353127	2.4568e-11	1.24405e-09	0.0539912
ENSG00000137601	NEK1	-0.521881	2.70688e-11	1.36678e-09	0.0809731
ENSG00000111731	C2CD5	-0.384484	2.93217e-11	1.47633e-09	0.0589843
ENSG00000180900	SCRIB	1.19497	3.00405e-11	1.50824e-09	0.18884
ENSG00000047315	POLR2B	-0.412572	3.23038e-11	1.61729e-09	0.0638741
ENSG00000124486	USP9X	-0.378529	3.3757e-11	1.68528e-09	0.0580591
ENSG00000008710	PKD1	1.28578	3.71388e-11	1.84891e-09	0.205022
ENSG00000244486	SCARF2	1.43207	3.76126e-11	1.86725e-09	0.235356
ENSG00000184260	H2AC20	2.12917	3.9995e-11	1.97997e-09	0.336289
ENSG00000152475	ZNF837	1.7274	4.02168e-11	1.98541e-09	0.277699
ENSG00000108839	ALOX12	0.724461	4.0644e-11	2.00093e-09	0.115256
ENSG00000167513	CDT1	1.57675	4.44999e-11	2.18469e-09	0.258409
ENSG00000149100	EIF3M	-0.411276	4.72812e-11	2.31482e-09	0.0645448
ENSG00000137944	KYAT3	-0.594156	4.86097e-11	2.37166e-09	0.0938157
ENSG00000198198	SZT2	0.343177	4.87097e-11	2.37166e-09	0.0527695
ENSG00000257315	ZBED6	1.63749	4.91673e-11	2.38738e-09	0.261174
ENSG00000174276	ZNHIT2	1.27403	5.1909e-11	2.51361e-09	0.208163
ENSG00000049769	PPP1R3F	0.952086	5.45072e-11	2.63224e-09	0.153437
ENSG00000167536	DHRS13	1.17605	5.59834e-11	2.69618e-09	0.188502
ENSG00000103197	TSC2	0.606632	5.65425e-11	2.71573e-09	0.0956541
ENSG00000169221	TBC1D10B	0.596366	5.69432e-11	2.72195e-09	0.0937734
ENSG00000214435	AS3MT	4.01747	5.69793e-11	2.72195e-09	0.662692
ENSG00000149823	VPS51	1.08745	5.808e-11	2.76707e-09	0.177782
ENSG00000090971	NAT14	1.11795	6.31716e-11	3.00158e-09	0.180428
ENSG00000229809	ZNF688	0.876657	6.55719e-11	3.1073e-09	0.142199
ENSG00000167674	HDGFL2	0.709471	6.60555e-11	3.12187e-09	0.113124
ENSG00000101405	OXT	3.15815	6.86786e-11	3.23721e-09	0.514967
ENSG00000085224	ATRX	-0.378839	7.03983e-11	3.30947e-09	0.0590228
ENSG00000197070	ARRDC1	0.749524	7.23304e-11	3.3913e-09	0.121093
ENSG00000125901	MRPS26	1.06614	7.31453e-11	3.42046e-09	0.173833
ENSG00000166233	ARIH1	-0.458344	7.40017e-11	3.4514e-09	0.0722237
ENSG00000115268	RPS15	1.29218	7.73328e-11	3.5973e-09	0.212575
ENSG00000163704	PRRT3	0.901756	8.1643e-11	3.78785e-09	0.147229
ENSG00000155827	RNF20	-0.301795	8.19076e-11	3.7902e-09	0.047067
ENSG00000099804	CDC34	0.839786	8.23842e-11	3.80233e-09	0.135066
ENSG00000154370	TRIM11	0.495583	8.41362e-11	3.86307e-09	0.0789734
ENSG00000170892	TSEN34	0.402348	8.39733e-11	3.86307e-09	0.0633486
ENSG00000171462	DLK2	1.09001	8.57301e-11	3.92608e-09	0.175999
ENSG00000085832	EPS15	-0.545616	8.67911e-11	3.9441e-09	0.0860882
ENSG00000130254	SAFB2	0.624374	8.64377e-11	3.9441e-09	0.100179
ENSG00000138834	MAPK8IP3	0.797766	8.67437e-11	3.9441e-09	0.129524
ENSG00000227507	LTB	1.21804	9.15908e-11	4.15157e-09	0.200077
ENSG00000163608	NEPRO	-0.495234	9.61518e-11	4.34719e-09	0.0791999
ENSG00000175221	MED16	1.04966	9.91535e-11	4.47149e-09	0.170332
ENSG00000175137	SH3BP5L	0.482885	1.0398e-10	4.67726e-09	0.0771805
ENSG00000132522	GPS2	0.857488	1.05129e-10	4.71698e-09	0.140241
ENSG00000165669	FAM204A	-0.358745	1.17606e-10	5.26346e-09	0.0566584
ENSG00000147119	CHST7	1.74448	1.18189e-10	5.27624e-09	0.282943
ENSG00000099821	POLRMT	0.953941	1.2059e-10	5.3699e-09	0.156376
ENSG00000111530	CAND1	-0.267496	1.32071e-10	5.8664e-09	0.0422
ENSG00000276043	UHRF1	1.05374	1.39734e-10	6.19127e-09	0.174729
ENSG00000082213	C5orf22	-0.388871	1.42913e-10	6.31634e-09	0.0620271
ENSG00000143952	VPS54	-0.525266	1.50082e-10	6.61669e-09	0.0847362
ENSG00000100294	MCAT	0.90607	1.55357e-10	6.83226e-09	0.148901
ENSG00000170604	IRF2BP1	1.46742	1.56017e-10	6.84429e-09	0.245066
ENSG00000214160	ALG3	0.481964	1.60705e-10	7.03253e-09	0.0778451
ENSG00000161677	JOSD2	1.39339	1.62569e-10	7.09658e-09	0.232592
ENSG00000173638	SLC19A1	0.877438	1.63618e-10	7.12482e-09	0.143796
ENSG00000198113	TOR4A	1.25284	1.64505e-10	7.14589e-09	0.206654
ENSG00000153147	SMARCA5	-0.503583	1.6495e-10	7.14771e-09	0.0815957
ENSG00000162298	SYVN1	0.426456	1.65877e-10	7.17033e-09	0.0685487
ENSG00000105963	ADAP1	1.35056	1.66691e-10	7.17055e-09	0.225479
ENSG00000149809	TM7SF2	0.705066	1.66677e-10	7.17055e-09	0.115833
ENSG00000204839	MROH6	1.10197	1.68199e-10	7.21787e-09	0.183555
ENSG00000214655	ZSWIM8	0.522999	1.78295e-10	7.63267e-09	0.0842338
ENSG00000146083	RNF44	0.836937	1.83787e-10	7.8488e-09	0.140003
ENSG00000197530	MIB2	1.37824	1.87791e-10	8.00051e-09	0.230223
ENSG00000148175	STOM	-0.650342	1.95774e-10	8.32064e-09	0.108503
ENSG00000136986	DERL1	-0.409342	2.02096e-10	8.56876e-09	0.0658824
ENSG00000151532	VTI1A	-0.335988	2.02756e-10	8.57622e-09	0.0536791
ENSG00000039123	MTREX	-0.467528	2.08765e-10	8.80937e-09	0.0765438
ENSG00000180921	FAM83H	1.17173	2.24265e-10	9.44098e-09	0.196902
ENSG00000171045	TSNARE1	1.00589	2.27118e-10	9.53842e-09	0.166444
ENSG00000144674	GOLGA4	-0.551686	2.34504e-10	9.82531e-09	0.090817
ENSG00000124535	WRNIP1	0.406372	2.39948e-10	1.00297e-08	0.0654131
ENSG00000168101	NUDT16L1	0.741691	2.40865e-10	1.00444e-08	0.125671
ENSG00000091947	TMEM101	0.401278	2.51939e-10	1.04815e-08	0.0651091
ENSG00000182952	HMGN4	-0.37735	2.7248e-10	1.13095e-08	0.0612843
ENSG00000266507	MIR4479	4.68187	2.74421e-10	1.13635e-08	0.903348
ENSG00000196505	GDAP2	-0.654883	2.82796e-10	1.1683e-08	0.108323
ENSG00000168096	ANKS3	0.532701	2.93161e-10	1.2083e-08	0.0873047
ENSG00000134086	VHL	0.609975	3.13123e-10	1.28758e-08	0.100306
ENSG00000108055	SMC3	-0.338997	3.22787e-10	1.32425e-08	0.0553855
ENSG00000139218	SCAF11	-0.389722	3.28703e-10	1.34541e-08	0.0624254
ENSG00000148334	PTGES2	0.59472	3.30603e-10	1.34696e-08	0.0992639
ENSG00000196504	PRPF40A	-0.360554	3.304e-10	1.34696e-08	0.058611
ENSG00000253352	TUG1	-0.356678	3.34967e-10	1.36161e-08	0.0578145
ENSG00000198918	RPL39	-0.950681	3.37123e-10	1.36724e-08	0.164572
ENSG00000070423	RNF126	1.29235	3.53319e-10	1.42965e-08	0.223844
ENSG00000196531	NACA	-0.488897	3.55162e-10	1.43383e-08	0.0809966
ENSG00000173621	LRFN4	1.88934	3.60274e-10	1.45117e-08	0.337986
ENSG00000113312	TTC1	-0.394384	3.6983e-10	1.48628e-08	0.0645607
ENSG00000076984	MAP2K7	0.709342	3.74834e-10	1.50174e-08	0.119628
ENSG00000077097	TOP2B	-0.416036	3.75371e-10	1.50174e-08	0.0676063
ENSG00000023287	RB1CC1	-0.488204	3.82683e-10	1.52414e-08	0.0802129
ENSG00000163636	PSMD6	-0.326258	3.8269e-10	1.52414e-08	0.0531326
ENSG00000100106	TRIOBP	0.656487	3.9593e-10	1.57333e-08	0.110143
ENSG00000101972	STAG2	-0.429513	4.0241e-10	1.59551e-08	0.0701099
ENSG00000221869	CEBPD	1.95299	4.04055e-10	1.59845e-08	0.325993
ENSG00000147274	RBMX	-0.37916	4.13006e-10	1.63022e-08	0.0623928
ENSG00000096401	CDC5L	-0.360638	4.14636e-10	1.63031e-08	0.0599012
ENSG00000179886	TIGD5	1.30738	4.14867e-10	1.63031e-08	0.223046
ENSG00000163781	TOPBP1	-0.353861	4.35064e-10	1.70538e-08	0.0579274
ENSG00000170242	USP47	-0.436322	4.35896e-10	1.70538e-08	0.0721803
ENSG00000128011	LRFN1	1.41667	4.45662e-10	1.73975e-08	0.248009
ENSG00000161544	CYGB	2.12455	4.50289e-10	1.75395e-08	0.372771
ENSG00000161914	ZNF653	0.780378	4.57919e-10	1.77976e-08	0.132017
ENSG00000180834	MAP6D1	2.23042	4.67031e-10	1.8112e-08	0.38556
ENSG00000107758	PPP3CB	-0.432566	4.81942e-10	1.86495e-08	0.0714344
ENSG00000215301	DDX3X	-0.424365	4.91183e-10	1.89657e-08	0.0700109
ENSG00000130382	MLLT1	0.688548	5.21389e-10	2.00882e-08	0.115446
ENSG00000028839	TBPL1	-0.537869	5.41663e-10	2.08241e-08	0.0902978
ENSG00000115607	IL18RAP	-1.14558	5.46005e-10	2.09003e-08	0.198304
ENSG00000143543	JTB	-0.801447	5.45289e-10	2.09003e-08	0.137056
ENSG00000126524	SBDS	-0.76812	5.53233e-10	2.10952e-08	0.131852
ENSG00000126653	NSRP1	-0.431579	5.53478e-10	2.10952e-08	0.0714862
ENSG00000114062	UBE3A	-0.377528	5.7217e-10	2.16679e-08	0.0631023
ENSG00000130731	METTL26	0.955621	5.7214e-10	2.16679e-08	0.164001
ENSG00000135334	AKIRIN2	0.484612	5.71314e-10	2.16679e-08	0.0801891
ENSG00000177051	FBXO46	0.858805	5.75804e-10	2.1759e-08	0.146371
ENSG00000167685	ZNF444	0.665055	6.16075e-10	2.32313e-08	0.112129
ENSG00000214022	REPIN1	0.832808	6.17908e-10	2.32509e-08	0.143008
ENSG00000105723	GSK3A	0.56105	6.20624e-10	2.33036e-08	0.093235
ENSG00000138073	PREB	0.429087	6.309e-10	2.36394e-08	0.0712795
ENSG00000092096	SLC22A17	1.07883	6.34249e-10	2.37148e-08	0.183598
ENSG00000164068	RNF123	0.414609	6.56413e-10	2.44918e-08	0.0687834
ENSG00000141424	SLC39A6	-0.44416	6.68209e-10	2.48795e-08	0.0742955
ENSG00000169738	DCXR	0.988187	6.91977e-10	2.57105e-08	0.171553
ENSG00000138381	ASNSD1	-0.509154	6.99686e-10	2.59425e-08	0.0856677
ENSG00000133027	PEMT	0.914407	7.35524e-10	2.72144e-08	0.158809
ENSG00000128228	SDF2L1	1.43097	7.40134e-10	2.73279e-08	0.259214
ENSG00000238227	TMEM250	0.716297	7.91226e-10	2.91536e-08	0.123863
ENSG00000105329	TGFB1	0.898537	8.07044e-10	2.96748e-08	0.157295
ENSG00000142798	HSPG2	1.46429	8.11393e-10	2.97729e-08	0.258613
ENSG00000136527	TRA2B	-0.378867	8.18201e-10	2.99607e-08	0.0632053
ENSG00000115524	SF3B1	-0.357765	8.357e-10	3.05384e-08	0.0596692
ENSG00000148229	POLE3	-0.454693	8.49765e-10	3.09885e-08	0.0773943
ENSG00000188032	C19orf67	3.07925	8.56388e-10	3.11659e-08	0.539938
ENSG00000214114	MYCBP	-0.549102	8.58578e-10	3.11815e-08	0.0939089
ENSG00000167548	KMT2D	0.564824	9.05727e-10	3.28266e-08	0.0952927
ENSG00000004059	ARF5	0.48622	9.43951e-10	3.41421e-08	0.0822369
ENSG00000119669	IRF2BPL	0.964123	9.51188e-10	3.43338e-08	0.168387
ENSG00000012963	UBR7	-0.43709	9.5589e-10	3.44334e-08	0.0734713
ENSG00000105655	ISYNA1	1.05859	9.63821e-10	3.46487e-08	0.18457
ENSG00000104964	TLE5	0.965916	1.03208e-09	3.70275e-08	0.170527
ENSG00000167543	TP53I13	0.871422	1.03787e-09	3.71599e-08	0.152863
ENSG00000060749	QSER1	-0.566931	1.04571e-09	3.72898e-08	0.0969328
ENSG00000147251	DOCK11	-0.414662	1.04512e-09	3.72898e-08	0.0698174
ENSG00000118482	PHF3	-0.408741	1.06018e-09	3.77301e-08	0.0688066
ENSG00000055147	FAM114A2	-0.412959	1.08642e-09	3.85863e-08	0.0695813
ENSG00000161671	EMC10	0.64085	1.10728e-09	3.9234e-08	0.111506
ENSG00000185189	NRBP2	0.743876	1.10908e-09	3.9234e-08	0.128771
ENSG00000110717	NDUFS8	0.662937	1.12443e-09	3.96977e-08	0.115493
ENSG00000286264		1.75482	1.14498e-09	4.03428e-08	0.32301
ENSG00000125676	THOC2	-0.343426	1.14887e-09	4.03998e-08	0.0572006
ENSG00000080819	CPOX	0.461758	1.15852e-09	4.06583e-08	0.0780116
ENSG00000123106	CCDC91	-0.478282	1.17496e-09	4.11539e-08	0.0814356
ENSG00000198055	GRK6	0.617087	1.20098e-09	4.19823e-08	0.107286
ENSG00000139722	VPS37B	0.495287	1.25601e-09	4.38195e-08	0.0844861
ENSG00000064995	TAF11	-0.330488	1.25915e-09	4.38426e-08	0.0557239
ENSG00000126777	KTN1	-0.476494	1.26196e-09	4.38545e-08	0.0809078
ENSG00000125356	NDUFA1	-0.65581	1.31008e-09	4.54373e-08	0.115147
ENSG00000121879	PIK3CA	-0.429242	1.33972e-09	4.63748e-08	0.0725318
ENSG00000122299	ZC3H7A	-0.264379	1.35834e-09	4.69276e-08	0.0442049
ENSG00000198677	SKIC3	-0.359616	1.36469e-09	4.70554e-08	0.0609023
ENSG00000089818	NECAP1	-0.357841	1.37302e-09	4.72507e-08	0.0609406
ENSG00000078808	SDF4	0.558112	1.40328e-09	4.81052e-08	0.0956662
ENSG00000080603	SRCAP	0.691101	1.40174e-09	4.81052e-08	0.119536
ENSG00000142459	EVI5L	0.817683	1.46732e-09	5.02033e-08	0.143094
ENSG00000090612	ZNF268	-0.500518	1.50544e-09	5.14083e-08	0.086587
ENSG00000104886	PLEKHJ1	0.575849	1.52212e-09	5.1878e-08	0.100084
ENSG00000099866	MADCAM1	1.77986	1.53862e-09	5.23396e-08	0.31348
ENSG00000171161	ZNF672	0.56572	1.54579e-09	5.24828e-08	0.0976691
ENSG00000101844	ATG4A	-0.48043	1.55473e-09	5.26015e-08	0.0822468
ENSG00000167487	KLHL26	0.913348	1.55522e-09	5.26015e-08	0.160813
ENSG00000174165	ZDHHC24	0.67476	1.65837e-09	5.59835e-08	0.118397
ENSG00000133265	HSPBP1	0.932651	1.67198e-09	5.63357e-08	0.168887
ENSG00000123143	PKN1	0.733619	1.68002e-09	5.6499e-08	0.128059
ENSG00000176472	ZNF575	1.14189	1.69033e-09	5.67381e-08	0.203678
ENSG00000038358	EDC4	0.426325	1.71014e-09	5.72945e-08	0.072962
ENSG00000164347	GFM2	-0.377127	1.71562e-09	5.73696e-08	0.0639714
ENSG00000175354	PTPN2	-0.434514	1.74759e-09	5.83287e-08	0.0743454
ENSG00000109606	DHX15	-0.37404	1.7725e-09	5.90487e-08	0.0641459
ENSG00000077254	USP33	-0.411234	1.78733e-09	5.94314e-08	0.0699006
ENSG00000179632	MAF1	0.512493	1.81107e-09	6.01078e-08	0.0889047
ENSG00000100263	RHBDD3	0.746284	1.83332e-09	6.07326e-08	0.131978
ENSG00000179091	CYC1	0.618429	1.87606e-09	6.19168e-08	0.109494
ENSG00000212864	RNF208	1.59354	1.87577e-09	6.19168e-08	0.283471
ENSG00000133315	MACROD1	1.5676	1.90213e-09	6.26606e-08	0.285577
ENSG00000259956	RBM15B	0.294026	1.93812e-09	6.37278e-08	0.0498197
ENSG00000087206	UIMC1	-0.412456	1.94605e-09	6.37555e-08	0.0705775
ENSG00000138468	SENP7	-0.442817	1.94616e-09	6.37555e-08	0.0762582
ENSG00000183691	NOG	2.10446	2.04403e-09	6.68383e-08	0.385517
ENSG00000159069	FBXW5	1.07311	2.05251e-09	6.69919e-08	0.191978
ENSG00000176248	ANAPC2	0.614214	2.12085e-09	6.90954e-08	0.108273
ENSG00000196646	ZNF136	-0.577787	2.14569e-09	6.97764e-08	0.101186
ENSG00000105738	SIPA1L3	0.754521	2.16379e-09	7.02359e-08	0.132748
ENSG00000164329	TENT2	-0.401144	2.18728e-09	7.08686e-08	0.0689916
ENSG00000198355	PIM3	1.19251	2.32974e-09	7.53466e-08	0.21535
ENSG00000162591	MEGF6	1.18392	2.3404e-09	7.55535e-08	0.213035
ENSG00000105254	TBCB	0.488197	2.36112e-09	7.60837e-08	0.0853377
ENSG00000076242	MLH1	-0.32511	2.39477e-09	7.70283e-08	0.0556917
ENSG00000138081	FBXO11	-0.324322	2.4186e-09	7.76538e-08	0.055949
ENSG00000083099	LYRM2	-0.3603	2.46866e-09	7.91175e-08	0.0619858
ENSG00000128708	HAT1	-0.498514	2.49509e-09	7.98204e-08	0.0876796
ENSG00000130479	MAP1S	1.14926	2.51169e-09	8.02068e-08	0.206484
ENSG00000129951	PLPPR3	1.85066	2.51791e-09	8.02606e-08	0.334837
ENSG00000205758	CRYZL1	-0.341711	2.65956e-09	8.46237e-08	0.058662
ENSG00000069424	KCNAB2	0.65028	2.78861e-09	8.85709e-08	0.114441
ENSG00000060069	CTDP1	0.780594	2.8036e-09	8.88876e-08	0.138716
ENSG00000106244	PDAP1	0.314373	2.81067e-09	8.89526e-08	0.053989
ENSG00000114554	PLXNA1	0.79473	2.82179e-09	8.91455e-08	0.140393
ENSG00000094975	SUCO	-0.362863	2.88954e-09	9.11232e-08	0.0627854
ENSG00000161013	MGAT4B	0.634007	3.12442e-09	9.83555e-08	0.112556
ENSG00000146576	INTS15	0.6971	3.28273e-09	1.03156e-07	0.124631
ENSG00000101846	STS	-0.636757	3.33368e-09	1.04571e-07	0.113498
ENSG00000167393	PPP2R3B	0.891145	3.38819e-09	1.06093e-07	0.159594
ENSG00000121851	POLR3GL	-0.551374	3.40588e-09	1.06459e-07	0.0977556
ENSG00000196456	ZNF775	1.26832	3.42029e-09	1.06722e-07	0.230514
ENSG00000166454	ATMIN	-0.329103	3.43342e-09	1.06876e-07	0.0565761
ENSG00000179564	LSMEM2	2.30118	3.43729e-09	1.06876e-07	0.422326
ENSG00000173141	MRPL57	0.694975	3.46889e-09	1.07669e-07	0.125883
ENSG00000198837	DENND4B	0.457374	3.5191e-09	1.09037e-07	0.0796046
ENSG00000185803	SLC52A2	0.702935	3.68274e-09	1.13908e-07	0.126119
ENSG00000204370	SDHD	-0.673074	3.6912e-09	1.13971e-07	0.122583
ENSG00000176024	ZNF613	-0.521789	3.70956e-09	1.14338e-07	0.0923402
ENSG00000163535	SGO2	-0.631887	3.74209e-09	1.15141e-07	0.11237
ENSG00000127663	KDM4B	0.810243	3.83382e-09	1.17759e-07	0.143055
ENSG00000099783	HNRNPM	0.373568	4.02077e-09	1.23287e-07	0.065126
ENSG00000103152	MPG	0.926258	4.05803e-09	1.24215e-07	0.168029
ENSG00000102890	ELMO3	0.870438	4.11247e-09	1.25664e-07	0.159463
ENSG00000139350	NEDD1	-0.335402	4.14349e-09	1.26394e-07	0.0581542
ENSG00000124574	ABCC10	0.550449	4.20718e-09	1.28117e-07	0.0971803
ENSG00000135336	ORC3	-0.329623	4.25356e-09	1.29307e-07	0.0573792
ENSG00000179588	ZFPM1	1.53582	4.26542e-09	1.29445e-07	0.283747
ENSG00000185453	ZSWIM9	0.752392	4.3946e-09	1.33138e-07	0.134086
ENSG00000169683	LRRC45	0.886158	4.41143e-09	1.33419e-07	0.160144
ENSG00000152700	SAR1B	-0.34866	4.58051e-09	1.38297e-07	0.0609976
ENSG00000162607	USP1	-0.445866	4.64115e-09	1.3989e-07	0.0792612
ENSG00000153207	AHCTF1	-0.407436	4.90435e-09	1.47572e-07	0.0720647
ENSG00000103024	NME3	1.34282	5.12178e-09	1.53853e-07	0.2504
ENSG00000166225	FRS2	-0.511507	5.18698e-09	1.55548e-07	0.0911308
ENSG00000166188	ZNF319	0.801753	5.21562e-09	1.56143e-07	0.145147
ENSG00000112893	MAN2A1	-0.456331	5.33941e-09	1.59579e-07	0.0809152
ENSG00000126934	MAP2K2	0.693334	5.38477e-09	1.60664e-07	0.125182
ENSG00000153443	UBALD1	0.944428	5.50397e-09	1.63669e-07	0.173988
ENSG00000167797	CDK2AP2	0.667135	5.49995e-09	1.63669e-07	0.121654
ENSG00000153201	RANBP2	-0.448554	5.51368e-09	1.63683e-07	0.0801643
ENSG00000158716	DUSP23	1.12995	5.53167e-09	1.63943e-07	0.215924
ENSG00000112651	MRPL2	0.797836	5.68408e-09	1.67898e-07	0.146586
ENSG00000198886	MT-ND4	-0.729003	5.67878e-09	1.67898e-07	0.134719
ENSG00000182628	SKA2	-0.486959	5.71691e-09	1.68587e-07	0.0874195
ENSG00000197050	ZNF420	-0.596337	5.87473e-09	1.72953e-07	0.107667
ENSG00000130244	FAM98C	0.556322	5.89507e-09	1.72977e-07	0.0998675
ENSG00000171823	FBXL14	1.15846	5.88958e-09	1.72977e-07	0.213953
ENSG00000092148	HECTD1	-0.29874	5.9881e-09	1.75417e-07	0.0522461
ENSG00000102753	KPNA3	-0.462848	6.01263e-09	1.75555e-07	0.0826452
ENSG00000168538	TRAPPC11	-0.34693	6.00796e-09	1.75555e-07	0.0604738
ENSG00000070476	ZXDC	0.306927	6.18713e-09	1.80353e-07	0.0531812
ENSG00000079313	REXO1	0.816206	6.33435e-09	1.84243e-07	0.149757
ENSG00000112701	SENP6	-0.378187	6.34137e-09	1.84243e-07	0.0668872
ENSG00000107625	DDX50	-0.416147	6.42621e-09	1.86402e-07	0.0742908
ENSG00000019995	ZRANB1	-0.421672	6.49599e-09	1.88118e-07	0.0749323
ENSG00000130312	MRPL34	0.71998	6.76555e-09	1.95286e-07	0.132975
ENSG00000138768	USO1	-0.47063	6.76016e-09	1.95286e-07	0.0842226
ENSG00000040199	PHLPP2	-0.623845	6.84121e-09	1.97149e-07	0.113536
ENSG00000129083	COPB1	-0.454742	6.92162e-09	1.99143e-07	0.081706
ENSG00000075089	ACTR6	-0.458849	7.11764e-09	2.0445e-07	0.082418
ENSG00000185838	GNB1L	0.977079	7.42193e-09	2.12846e-07	0.181422
ENSG00000169972	PUSL1	0.853084	7.47827e-09	2.14115e-07	0.158138
ENSG00000113119	TMCO6	0.539339	7.64708e-09	2.18595e-07	0.0973453
ENSG00000119574	ZBTB45	1.00178	7.77174e-09	2.21801e-07	0.188233
ENSG00000133275	CSNK1G2	1.01981	7.99706e-09	2.27865e-07	0.191403
ENSG00000114209	PDCD10	-0.446747	8.01372e-09	2.27973e-07	0.0804097
ENSG00000103260	METRN	1.08919	8.06951e-09	2.29192e-07	0.207745
ENSG00000088205	DDX18	-0.385058	8.42567e-09	2.38925e-07	0.069308
ENSG00000165802	NSMF	0.7239	8.44216e-09	2.3901e-07	0.134096
ENSG00000064961	HMG20B	0.833763	8.53058e-09	2.41128e-07	0.155089
ENSG00000187522	HSPA14	-0.495533	8.65056e-09	2.44131e-07	0.0904764
ENSG00000178057	NDUFAF3	0.662651	8.66625e-09	2.44184e-07	0.1213
ENSG00000160570	DEDD2	0.826201	8.80653e-09	2.47743e-07	0.152916
ENSG00000213445	SIPA1	1.07083	8.891e-09	2.49723e-07	0.202209
ENSG00000177853	ZNF518A	-0.489604	9.37014e-09	2.62764e-07	0.0889621
ENSG00000197044	ZNF441	-0.601447	9.62988e-09	2.69621e-07	0.110479
ENSG00000108106	UBE2S	1.10608	9.71204e-09	2.71493e-07	0.20737
ENSG00000029363	BCLAF1	-0.546032	9.9387e-09	2.77392e-07	0.100375
ENSG00000172650	AGAP5	1.25904	1.04234e-08	2.90463e-07	0.237573
ENSG00000107816	LZTS2	0.873556	1.0739e-08	2.98787e-07	0.163389
ENSG00000175416	CLTB	0.769289	1.07744e-08	2.99301e-07	0.143672
ENSG00000233276	GPX1	1.62518	1.0937e-08	3.03344e-07	0.321089
ENSG00000107290	SETX	-0.477219	1.14112e-08	3.15507e-07	0.0855214
ENSG00000197766	CFD	2.59513	1.13984e-08	3.15507e-07	0.533488
ENSG00000198791	CNOT7	-0.390426	1.1533e-08	3.18379e-07	0.0708596
ENSG00000105699	LSR	0.885139	1.1664e-08	3.20996e-07	0.169243
ENSG00000183864	TOB2	0.402986	1.16592e-08	3.20996e-07	0.0726722
ENSG00000102871	TRADD	0.992728	1.20367e-08	3.3074e-07	0.187879
ENSG00000174428	GTF2IRD2B	0.846999	1.2271e-08	3.36654e-07	0.157432
ENSG00000185522	LMNTD2	1.54895	1.33585e-08	3.65923e-07	0.29965
ENSG00000140990	NDUFB10	0.577283	1.35316e-08	3.70094e-07	0.108617
ENSG00000214706	IFRD2	0.74358	1.35929e-08	3.71198e-07	0.14207
ENSG00000224051	CPTP	1.24407	1.3614e-08	3.71202e-07	0.238052
ENSG00000032219	ARID4A	-0.467198	1.37011e-08	3.73002e-07	0.0852825
ENSG00000101290	CDS2	-0.290554	1.3775e-08	3.7444e-07	0.0521943
ENSG00000108515	ENO3	0.631001	1.38368e-08	3.75542e-07	0.117834
ENSG00000189409	MMP23B	2.9003	1.39734e-08	3.78671e-07	0.568518
ENSG00000198517	MAFK	1.11432	1.46897e-08	3.97473e-07	0.215437
ENSG00000141524	TMC6	0.827046	1.47907e-08	3.99598e-07	0.156596
ENSG00000256087	ZNF432	-0.478544	1.49706e-08	4.03842e-07	0.0878869
ENSG00000063244	U2AF2	0.474998	1.5122e-08	4.07307e-07	0.0872447
ENSG00000171695	LKAAEAR1	2.91688	1.6083e-08	4.32533e-07	0.572445
ENSG00000167842	MIS12	-0.443196	1.61386e-08	4.33369e-07	0.0814464
ENSG00000147813	NAPRT	1.01143	1.66687e-08	4.46927e-07	0.191278
ENSG00000132952	USPL1	-0.463164	1.69726e-08	4.53704e-07	0.0857408
ENSG00000133704	IPO8	-0.315787	1.69517e-08	4.53704e-07	0.0567964
ENSG00000182973	CNOT10	-0.409009	1.71358e-08	4.57377e-07	0.0746293
ENSG00000066739	ATG2B	-0.344562	1.72638e-08	4.60099e-07	0.0628089
ENSG00000197785	ATAD3A	0.852256	1.73074e-08	4.60569e-07	0.163208
ENSG00000128626	MRPS12	0.766471	1.73556e-08	4.61158e-07	0.147027
ENSG00000105613	MAST1	1.457	1.83301e-08	4.86325e-07	0.282768
ENSG00000105397	TYK2	0.501518	1.83588e-08	4.86356e-07	0.0924492
ENSG00000135387	CAPRIN1	-0.30221	1.83954e-08	4.866e-07	0.0546711
ENSG00000235863	B3GALT4	0.578619	1.84386e-08	4.87016e-07	0.107606
ENSG00000103326	CAPN15	1.28085	1.85413e-08	4.88999e-07	0.246798
ENSG00000167283	ATP5MG	-0.50049	1.85742e-08	4.89139e-07	0.0939433
ENSG00000123179	EBPL	0.893131	1.87569e-08	4.93217e-07	0.168086
ENSG00000078814	MYH7B	1.0886	1.92239e-08	5.0475e-07	0.206594
ENSG00000085872	CHERP	0.852287	1.94357e-08	5.09554e-07	0.162869
ENSG00000103253	HAGHL	1.60242	1.951e-08	5.10747e-07	0.332215
ENSG00000177192	PUS1	0.592368	1.97697e-08	5.16783e-07	0.111011
ENSG00000135837	CEP350	-0.380061	2.15904e-08	5.63544e-07	0.0697816
ENSG00000084093	REST	-0.402927	2.17781e-08	5.67608e-07	0.0745257
ENSG00000161996	WDR90	0.870116	2.20207e-08	5.72247e-07	0.165657
ENSG00000213316	LTC4S	1.54682	2.20202e-08	5.72247e-07	0.307136
ENSG00000174672	BRSK2	1.21134	2.21608e-08	5.75046e-07	0.238391
ENSG00000170619	COMMD5	0.597332	2.25902e-08	5.8533e-07	0.113017
ENSG00000179526	SHARPIN	0.613539	2.30345e-08	5.95972e-07	0.116321
ENSG00000132549	VPS13B	-0.294702	2.32173e-08	5.99826e-07	0.053505
ENSG00000148481	MINDY3	-0.331108	2.33638e-08	6.02732e-07	0.0604242
ENSG00000127922	SEM1	-0.404391	2.34454e-08	6.02989e-07	0.0749986
ENSG00000143373	ZNF687	0.370385	2.34189e-08	6.02989e-07	0.0682493
ENSG00000179051	RCC2	0.345683	2.34758e-08	6.02989e-07	0.0636104
ENSG00000203485	INF2	1.04464	2.35891e-08	6.05022e-07	0.201076
ENSG00000277972	CISD3	0.750344	2.3871e-08	6.11365e-07	0.145575
ENSG00000141867	BRD4	0.464886	2.47435e-08	6.32798e-07	0.0863744
ENSG00000164897	TMUB1	1.11701	2.50509e-08	6.39738e-07	0.218909
ENSG00000169905	TOR1AIP2	-0.396705	2.50955e-08	6.39952e-07	0.0727502
ENSG00000099381	SETD1A	0.681221	2.5304e-08	6.43418e-07	0.129523
ENSG00000167615	LENG8	0.588239	2.52779e-08	6.43418e-07	0.111256
ENSG00000198700	IPO9	-0.23736	2.59276e-08	6.58331e-07	0.0431553
ENSG00000165525	NEMF	-0.291099	2.60045e-08	6.59338e-07	0.053775
ENSG00000153487	ING1	0.66343	2.67431e-08	6.77097e-07	0.125952
ENSG00000126464	PRR12	1.12215	2.7369e-08	6.91955e-07	0.217042
ENSG00000172748	ZNF596	-0.643399	2.83317e-08	7.15274e-07	0.124558
ENSG00000127870	RNF6	-0.325601	2.84301e-08	7.16738e-07	0.0611447
ENSG00000084676	NCOA1	-0.431003	2.85657e-08	7.19133e-07	0.0795207
ENSG00000145996	CDKAL1	-0.376461	2.89912e-08	7.2881e-07	0.0701232
ENSG00000172530	BANP	0.689764	2.91218e-08	7.31057e-07	0.130371
ENSG00000172175	MALT1	-0.436999	2.968e-08	7.44015e-07	0.0818091
ENSG00000167702	KIFC2	0.879112	2.99228e-08	7.47985e-07	0.169422
ENSG00000264947	MIR3181	4.48052	2.99209e-08	7.47985e-07	0.900691
ENSG00000083093	PALB2	-0.34188	3.00935e-08	7.51193e-07	0.0633576
ENSG00000275052	PPP4R3B	-0.310893	3.02785e-08	7.54748e-07	0.0574564
ENSG00000087470	DNM1L	-0.345759	3.06692e-08	7.63412e-07	0.0642106
ENSG00000128191	DGCR8	0.333124	3.07187e-08	7.63573e-07	0.0616311
ENSG00000165879	FRAT1	0.764372	3.08166e-08	7.64935e-07	0.146965
ENSG00000244754	N4BP2L2	-0.389156	3.11449e-08	7.72001e-07	0.0726019
ENSG00000047410	TPR	-0.366252	3.22696e-08	7.98762e-07	0.0668021
ENSG00000126391	FRMD8	0.470311	3.33162e-08	8.23519e-07	0.0888275
ENSG00000228300	FAM174C	1.03233	3.3526e-08	8.2755e-07	0.206351
ENSG00000004766	VPS50	-0.455809	3.35854e-08	8.27863e-07	0.0858367
ENSG00000198171	DDRGK1	0.499004	3.42332e-08	8.4266e-07	0.0943015
ENSG00000160993	ALKBH4	0.753378	3.44099e-08	8.45836e-07	0.146398
ENSG00000066557	LRRC40	-0.458822	3.45985e-08	8.47971e-07	0.0871364
ENSG00000187676	B3GLCT	-0.532101	3.45947e-08	8.47971e-07	0.10119
ENSG00000288649	ACTL10	1.9653	3.46403e-08	8.47971e-07	0.385159
ENSG00000185359	HGS	0.611576	3.46904e-08	8.48024e-07	0.116674
ENSG00000141569	TRIM65	0.508239	3.50079e-08	8.54606e-07	0.0964449
ENSG00000101199	ARFGAP1	0.483316	3.51739e-08	8.5748e-07	0.09164
ENSG00000278053	DDX52	-0.339824	3.56898e-08	8.68861e-07	0.063276
ENSG00000181027	FKRP	0.610438	3.58036e-08	8.70435e-07	0.117514
ENSG00000167325	RRM1	-0.446099	3.7321e-08	9.06083e-07	0.0847262
ENSG00000151779	NBAS	-0.378948	3.7528e-08	9.09861e-07	0.0711092
ENSG00000181652	ATG9B	0.876836	3.81468e-08	9.23602e-07	0.170245
ENSG00000101343	CRNKL1	-0.394739	3.83307e-08	9.26787e-07	0.0749564
ENSG00000153339	TRAPPC8	-0.416035	3.87097e-08	9.34676e-07	0.0778425
ENSG00000152601	MBNL1	-0.430963	3.89468e-08	9.39122e-07	0.0811266
ENSG00000171566	PLRG1	-0.39804	3.9523e-08	9.51721e-07	0.075517
ENSG00000135253	KCP	1.61824	4.00538e-08	9.63194e-07	0.314047
ENSG00000147874	HAUS6	-0.41695	4.02723e-08	9.67136e-07	0.0783785
ENSG00000168056	LTBP3	1.13008	4.08746e-08	9.80272e-07	0.224181
ENSG00000007080	CCDC124	0.909063	4.11202e-08	9.84439e-07	0.182376
ENSG00000175387	SMAD2	-0.395256	4.11595e-08	9.84439e-07	0.0739854
ENSG00000138398	PPIG	-0.269692	4.21565e-08	1.00693e-06	0.0502275
ENSG00000172336	POP7	0.719455	4.28648e-08	1.02247e-06	0.142673
ENSG00000128298	BAIAP2L2	0.813069	4.32486e-08	1.03024e-06	0.159321
ENSG00000153187	HNRNPU	-0.348722	4.37162e-08	1.03998e-06	0.0651121
ENSG00000119844	AFTPH	-0.325861	4.40095e-08	1.04555e-06	0.0607973
ENSG00000114650	SCAP	0.481908	4.41702e-08	1.04796e-06	0.0911153
ENSG00000119760	SUPT7L	-0.229953	4.44427e-08	1.05302e-06	0.0425674
ENSG00000141030	COPS3	-0.490808	4.47138e-08	1.05803e-06	0.0955342
ENSG00000169718	DUS1L	0.588053	4.48658e-08	1.0588e-06	0.11418
ENSG00000184986	TMEM121	2.3711	4.48366e-08	1.0588e-06	0.54385
ENSG00000161091	MFSD12	0.867803	4.51895e-08	1.06502e-06	0.171157
ENSG00000170684	ZNF296	1.18038	4.52533e-08	1.06511e-06	0.238591
ENSG00000107404	DVL1	1.10019	4.73559e-08	1.11259e-06	0.218089
ENSG00000115138	POMC	1.55979	4.73962e-08	1.11259e-06	0.325779
ENSG00000213516	RBMXL1	-0.532634	4.78732e-08	1.1223e-06	0.102545
ENSG00000163166	IWS1	-0.267956	4.86303e-08	1.13854e-06	0.0497989
ENSG00000157353	FCSK	0.602726	4.9011e-08	1.14594e-06	0.116894
ENSG00000073169	SELENOO	0.940213	4.91862e-08	1.14701e-06	0.18644
ENSG00000135736	CCDC102A	1.30934	4.9166e-08	1.14701e-06	0.266563
ENSG00000122692	SMU1	-0.435308	4.99636e-08	1.16285e-06	0.0839532
ENSG00000137266	SLC22A23	0.569283	4.99969e-08	1.16285e-06	0.109391
ENSG00000111684	LPCAT3	0.447616	5.03948e-08	1.17057e-06	0.0852041
ENSG00000181135	ZNF707	0.557541	5.05395e-08	1.1724e-06	0.107462
ENSG00000068912	ERLEC1	-0.404042	5.19018e-08	1.20242e-06	0.0765923
ENSG00000262919	CCNQ	0.606654	5.22254e-08	1.20834e-06	0.119164
ENSG00000062822	POLD1	0.85404	5.24481e-08	1.21033e-06	0.168862
ENSG00000075711	DLG1	-0.35522	5.24059e-08	1.21033e-06	0.067158
ENSG00000057608	GDI2	-0.3286	5.401e-08	1.24476e-06	0.0623609
ENSG00000053702	NRIP2	0.613065	5.4603e-08	1.25679e-06	0.118506
ENSG00000197982	C1orf122	1.21771	5.60517e-08	1.28846e-06	0.239712
ENSG00000127220	ABHD8	1.29492	5.65649e-08	1.29857e-06	0.260881
ENSG00000198727	MT-CYB	-0.499983	5.69232e-08	1.30511e-06	0.0985476
ENSG00000137770	CTDSPL2	-0.481106	5.78291e-08	1.32417e-06	0.0916024
ENSG00000163904	SENP2	-0.355651	5.86387e-08	1.34097e-06	0.0674369
ENSG00000110011	DNAJC4	0.609553	6.13299e-08	1.40071e-06	0.119643
ENSG00000076201	PTPN23	0.554641	6.17838e-08	1.40926e-06	0.107096
ENSG00000185862	EVI2B	-0.697012	6.20234e-08	1.41291e-06	0.138106
ENSG00000105516	DBP	1.08947	6.25558e-08	1.42321e-06	0.224623
ENSG00000139323	POC1B	-0.389553	6.28395e-08	1.42783e-06	0.0742175
ENSG00000269335	IKBKG	0.405766	6.3361e-08	1.43783e-06	0.0771876
ENSG00000175938	ORAI3	0.858772	6.43735e-08	1.45894e-06	0.170382
ENSG00000129968	ABHD17A	1.06134	6.45988e-08	1.46218e-06	0.216754
ENSG00000213551	DNAJC9	0.684441	6.47512e-08	1.46376e-06	0.134594
ENSG00000273576	NA	-0.65469	6.66792e-08	1.50542e-06	0.12929
ENSG00000070444	MNT	0.518825	6.85085e-08	1.54475e-06	0.100758
ENSG00000115875	SRSF7	-0.402792	7.0983e-08	1.59852e-06	0.0772807
ENSG00000124383	MPHOSPH10	-0.425024	7.11133e-08	1.59942e-06	0.0825794
ENSG00000183153	GJD3	2.59644	7.14329e-08	1.60457e-06	0.531776
ENSG00000108651	UTP6	-0.338632	7.22932e-08	1.62184e-06	0.0646035
ENSG00000104825	NFKBIB	0.729738	7.34236e-08	1.64512e-06	0.145943
ENSG00000106400	ZNHIT1	0.479627	7.38433e-08	1.65035e-06	0.0929418
ENSG00000169689	CENPX	0.519996	7.38376e-08	1.65035e-06	0.10238
ENSG00000067248	DHX29	-0.331255	7.43461e-08	1.65949e-06	0.0629231
ENSG00000100726	TELO2	1.00242	7.54799e-08	1.68268e-06	0.204329
ENSG00000124207	CSE1L	-0.387057	7.716e-08	1.71797e-06	0.0745448
ENSG00000117751	PPP1R8	-0.298371	7.81391e-08	1.73759e-06	0.0566354
ENSG00000148384	INPP5E	0.694617	7.93695e-08	1.76274e-06	0.136344
ENSG00000125731	SH2D3A	0.778141	7.96279e-08	1.76626e-06	0.155706
ENSG00000083520	DIS3	-0.362086	7.99083e-08	1.77027e-06	0.0696017
ENSG00000064545	TMEM161A	0.745219	8.01625e-08	1.77147e-06	0.148668
ENSG00000167280	ENGASE	0.648037	8.00766e-08	1.77147e-06	0.128018
ENSG00000115694	STK25	0.360281	8.16127e-08	1.80127e-06	0.0693537
ENSG00000164332	UBLCP1	-0.359725	8.19547e-08	1.80657e-06	0.0694248
ENSG00000185009	AP3M1	-0.360854	8.37533e-08	1.84392e-06	0.0696486
ENSG00000284691		0.905717	8.43759e-08	1.85533e-06	0.181073
ENSG00000186432	KPNA4	-0.550444	8.4691e-08	1.85995e-06	0.10936
ENSG00000167522	ANKRD11	0.419159	8.66037e-08	1.8996e-06	0.081025
ENSG00000104852	SNRNP70	0.703676	8.75507e-08	1.91353e-06	0.140325
ENSG00000108819	PPP1R9B	0.793802	8.74303e-08	1.91353e-06	0.158738
ENSG00000170638	TRABD	1.18736	8.75629e-08	1.91353e-06	0.24777
ENSG00000178163	ZNF518B	-0.35161	9.04341e-08	1.97385e-06	0.0672384
ENSG00000161618	ALDH16A1	0.933338	9.08451e-08	1.98038e-06	0.189467
ENSG00000104880	ARHGEF18	0.702236	9.12578e-08	1.98693e-06	0.142425
ENSG00000127511	SIN3B	0.566567	9.19052e-08	1.99857e-06	0.111919
ENSG00000108479	GALK1	0.811257	9.39725e-08	2.04102e-06	0.165515
ENSG00000168936	TMEM129	0.590888	9.47244e-08	2.05484e-06	0.117766
ENSG00000159086	PAXBP1	-0.319153	9.50701e-08	2.05981e-06	0.0610577
ENSG00000104643	MTMR9	-0.443551	9.53672e-08	2.06121e-06	0.0869944
ENSG00000156671	SAMD8	-0.459341	9.52633e-08	2.06121e-06	0.0898877
ENSG00000134815	DHX34	0.719205	9.58251e-08	2.06858e-06	0.143201
ENSG00000161970	RPL26	-0.72441	9.75711e-08	2.10271e-06	0.146695
ENSG00000205643	CDPF1	0.616782	9.76432e-08	2.10271e-06	0.123729
ENSG00000110852	CLEC2B	-0.599621	9.83039e-08	2.10988e-06	0.118607
ENSG00000127585	FBXL16	1.08162	9.83333e-08	2.10988e-06	0.224588
ENSG00000130299	GTPBP3	0.703111	9.8251e-08	2.10988e-06	0.140328
ENSG00000092020	PPP2R3C	-0.500975	9.87127e-08	2.11164e-06	0.0991394
ENSG00000140688	RUSF1	0.409944	9.87728e-08	2.11164e-06	0.0802931
ENSG00000160325	CACFD1	0.663147	9.8576e-08	2.11164e-06	0.131553
ENSG00000133247	KMT5C	1.0218	9.96026e-08	2.12682e-06	0.206336
ENSG00000092201	SUPT16H	-0.326751	9.98943e-08	2.12991e-06	0.0631122
ENSG00000104524	PYCR3	0.782844	9.99877e-08	2.12991e-06	0.159284
ENSG00000188305	PEAK3	1.33016	1.03277e-07	2.19734e-06	0.269508
ENSG00000171219	CDC42BPG	0.967983	1.04616e-07	2.22314e-06	0.196564
ENSG00000215440	NPEPL1	0.809407	1.05639e-07	2.24221e-06	0.164559
ENSG00000115484	CCT4	-0.289934	1.06114e-07	2.24959e-06	0.0560541
ENSG00000151806	GUF1	-0.35284	1.06537e-07	2.25587e-06	0.0686239
ENSG00000113387	SUB1	-0.430315	1.08264e-07	2.2897e-06	0.0848636
ENSG00000189180	ZNF33A	-0.501864	1.08743e-07	2.29708e-06	0.100109
ENSG00000184524	CEND1	1.96628	1.10159e-07	2.32423e-06	0.40864
ENSG00000163104	SMARCAD1	-0.437826	1.10731e-07	2.33351e-06	0.0859638
ENSG00000137492	THAP12	-0.345228	1.12299e-07	2.36375e-06	0.0667694
ENSG00000125898	FAM110A	0.948238	1.12441e-07	2.36392e-06	0.189802
ENSG00000004897	CDC27	-0.448133	1.14356e-07	2.39849e-06	0.0875272
ENSG00000107651	SEC23IP	-0.312657	1.14242e-07	2.39849e-06	0.0609815
ENSG00000067900	ROCK1	-0.341659	1.1451e-07	2.39889e-06	0.0659874
ENSG00000198408	OGA	-0.407259	1.15245e-07	2.41143e-06	0.0797614
ENSG00000165934	CPSF2	-0.444309	1.17935e-07	2.46482e-06	0.0874
ENSG00000103591	AAGAB	-0.408107	1.18949e-07	2.48308e-06	0.0802578
ENSG00000151470	C4orf33	-0.656119	1.19835e-07	2.49863e-06	0.132079
ENSG00000119559	C19orf25	0.71825	1.2079e-07	2.51263e-06	0.147074
ENSG00000186787	SPIN2B	0.618377	1.20752e-07	2.51263e-06	0.124426
ENSG00000025796	SEC63	-0.432463	1.21351e-07	2.52135e-06	0.0851322
ENSG00000113597	TRAPPC13	-0.401333	1.21629e-07	2.52415e-06	0.0783136
ENSG00000180448	ARHGAP45	1.02371	1.21882e-07	2.52646e-06	0.212811
ENSG00000149308	NPAT	-0.552182	1.237e-07	2.56114e-06	0.109871
ENSG00000166266	CUL5	-0.497663	1.24431e-07	2.57326e-06	0.0988756
ENSG00000158792	SPATA2L	0.961024	1.2563e-07	2.59504e-06	0.198024
ENSG00000108406	DHX40	-0.380617	1.262e-07	2.60378e-06	0.0750622
ENSG00000033100	CHPF2	0.344343	1.27378e-07	2.62501e-06	0.0668844
ENSG00000040608	RTN4R	1.85543	1.29229e-07	2.66007e-06	0.407883
ENSG00000110719	TCIRG1	0.927814	1.31137e-07	2.69622e-06	0.189975
ENSG00000119041	GTF3C3	-0.341701	1.3184e-07	2.70753e-06	0.0663683
ENSG00000160999	SH2B2	1.2345	1.32067e-07	2.70906e-06	0.250991
ENSG00000069248	NUP133	-0.299272	1.33665e-07	2.73866e-06	0.0581493
ENSG00000167962	ZNF598	0.977612	1.34307e-07	2.74863e-06	0.202553
ENSG00000196557	CACNA1H	1.26249	1.35371e-07	2.76723e-06	0.264002
ENSG00000036549	ZZZ3	-0.394393	1.37773e-07	2.81308e-06	0.0789798
ENSG00000127080	IPPK	0.545654	1.38373e-07	2.82207e-06	0.110045
ENSG00000005175	RPAP3	-0.430526	1.39005e-07	2.8317e-06	0.0847303
ENSG00000149091	DGKZ	0.761644	1.45192e-07	2.95435e-06	0.157137
ENSG00000125746	EML2	0.316314	1.45491e-07	2.95529e-06	0.0612627
ENSG00000165494	PCF11	-0.235393	1.45572e-07	2.95529e-06	0.0453313
ENSG00000198832	SELENOM	1.17752	1.48258e-07	3.00638e-06	0.24843
ENSG00000106009	BRAT1	0.787058	1.48429e-07	3.00641e-06	0.16279
ENSG00000235173	HGH1	0.777143	1.49082e-07	3.01618e-06	0.159556
ENSG00000030066	NUP160	-0.435292	1.5583e-07	3.14912e-06	0.0866477
ENSG00000171206	TRIM8	0.541527	1.56668e-07	3.16245e-06	0.109529
ENSG00000159593	NAE1	-0.437438	1.58844e-07	3.20272e-06	0.0872769
ENSG00000198393	ZNF26	-0.403674	1.60049e-07	3.22336e-06	0.0798948
ENSG00000135519	KCNH3	1.13962	1.61045e-07	3.23972e-06	0.238203
ENSG00000119446	RBM18	-0.39269	1.6279e-07	3.26742e-06	0.0784997
ENSG00000135945	REV1	-0.275034	1.62762e-07	3.26742e-06	0.0532732
ENSG00000204308	RNF5	0.396528	1.67286e-07	3.35385e-06	0.0783338
ENSG00000130734	ATG4D	0.684272	1.67871e-07	3.36179e-06	0.141713
ENSG00000166189	HPS6	0.640362	1.6893e-07	3.37916e-06	0.130813
ENSG00000090975	PITPNM2	1.08621	1.69772e-07	3.3922e-06	0.225058
ENSG00000138182	KIF20B	-0.736145	1.70106e-07	3.39445e-06	0.152055
ENSG00000196498	NCOR2	0.939934	1.70268e-07	3.39445e-06	0.194934
ENSG00000130733	YIPF2	0.670628	1.73607e-07	3.45712e-06	0.137533
ENSG00000145217	SLC26A1	1.03065	1.74526e-07	3.47152e-06	0.21633
ENSG00000150712	MTMR12	-0.293279	1.75293e-07	3.47705e-06	0.0581083
ENSG00000197283	SYNGAP1	0.756837	1.75112e-07	3.47705e-06	0.153511
ENSG00000198612	COPS8	-0.381032	1.75392e-07	3.47705e-06	0.0759229
ENSG00000033011	ALG1	0.392001	1.77191e-07	3.50878e-06	0.0778025
ENSG00000248333	CDK11B	0.431819	1.77588e-07	3.5127e-06	0.0862319
ENSG00000197119	SLC25A29	1.29486	1.84469e-07	3.64476e-06	0.270449
ENSG00000100146	SOX10	1.79388	1.88201e-07	3.71435e-06	0.375449
ENSG00000142330	CAPN10	0.73737	1.91842e-07	3.782e-06	0.151013
ENSG00000164896	FASTK	0.66645	1.93518e-07	3.81079e-06	0.138856
ENSG00000062485	CS	-0.268108	1.94704e-07	3.82564e-06	0.0525051
ENSG00000119431	HDHD3	0.499231	1.94559e-07	3.82564e-06	0.100637
ENSG00000221184		0.731364	1.95351e-07	3.83411e-06	0.150432
ENSG00000150316	CWC15	-0.423554	1.96404e-07	3.85051e-06	0.085361
ENSG00000115464	USP34	-0.334631	1.97645e-07	3.87057e-06	0.0653123
ENSG00000197608	ZNF841	-0.369552	1.97897e-07	3.87123e-06	0.0730873
ENSG00000162572	SCNN1D	1.08217	1.98882e-07	3.88621e-06	0.229755
ENSG00000198521	ZNF43	-0.411405	1.997e-07	3.89788e-06	0.0823945
ENSG00000213199	ASIC3	0.813425	2.01445e-07	3.92762e-06	0.172585
ENSG00000256683	ZNF350	-0.490672	2.05144e-07	3.99536e-06	0.100906
ENSG00000213213	CCDC183	0.932138	2.05725e-07	4.00227e-06	0.196412
ENSG00000132000	PODNL1	1.34077	2.06038e-07	4.00395e-06	0.281875
ENSG00000258366	RTEL1	0.675631	2.07856e-07	4.03487e-06	0.138646
ENSG00000051523	CYBA	0.721964	2.09621e-07	4.06468e-06	0.150552
ENSG00000007376	RPUSD1	0.930269	2.10576e-07	4.07873e-06	0.196894
ENSG00000130669	PAK4	1.01484	2.11021e-07	4.08289e-06	0.212317
ENSG00000148356	LRSAM1	0.368928	2.12462e-07	4.10628e-06	0.0733538
ENSG00000176978	DPP7	0.845825	2.138e-07	4.12764e-06	0.178811
ENSG00000138018	SELENOI	-0.599813	2.15126e-07	4.14831e-06	0.122994
ENSG00000142444	TIMM29	0.570913	2.15339e-07	4.14831e-06	0.117538
ENSG00000062194	GPBP1	-0.521665	2.15666e-07	4.15012e-06	0.105846
ENSG00000138698	RAP1GDS1	-0.356055	2.16999e-07	4.17123e-06	0.071342
ENSG00000187808	SOWAHD	1.30118	2.17768e-07	4.18147e-06	0.287882
ENSG00000197885	NKIRAS1	-0.505345	2.18837e-07	4.19745e-06	0.102623
ENSG00000089820	ARHGAP4	0.931672	2.206e-07	4.22669e-06	0.198102
ENSG00000113407	TARS1	-0.531124	2.21403e-07	4.23749e-06	0.108772
ENSG00000239282	CASTOR1	1.09429	2.2195e-07	4.24339e-06	0.232759
ENSG00000176410	DNAJC30	0.650986	2.25486e-07	4.30635e-06	0.135888
ENSG00000101216	GMEB2	0.551959	2.27355e-07	4.33736e-06	0.113581
ENSG00000233436	BTBD18	1.12995	2.28819e-07	4.36061e-06	0.244608
ENSG00000163754	GYG1	-0.484177	2.32911e-07	4.43211e-06	0.0994154
ENSG00000197647	ZNF433	-0.753323	2.33071e-07	4.43211e-06	0.156562
ENSG00000181790	ADGRB1	2.15492	2.33592e-07	4.43725e-06	0.447902
ENSG00000068784	SRBD1	-0.464187	2.34171e-07	4.44348e-06	0.0943921
ENSG00000127980	PEX1	-0.375289	2.35426e-07	4.46252e-06	0.0749433
ENSG00000113441	LNPEP	-0.579007	2.37585e-07	4.49863e-06	0.119022
ENSG00000108599	AKAP10	-0.307968	2.38276e-07	4.5069e-06	0.0610128
ENSG00000183431	SF3A3	-0.372566	2.47519e-07	4.67674e-06	0.0754175
ENSG00000251322	SHANK3	1.43951	2.54633e-07	4.80602e-06	0.310722
ENSG00000081237	PTPRC	-0.465531	2.55707e-07	4.82117e-06	0.0935252
ENSG00000130429	ARPC1B	0.599856	2.56531e-07	4.82643e-06	0.123923
ENSG00000186577	SMIM29	0.614135	2.56376e-07	4.82643e-06	0.128024
ENSG00000167526	RPL13	0.858199	2.57237e-07	4.83458e-06	0.182574
ENSG00000121067	SPOP	-0.241982	2.58468e-07	4.85258e-06	0.0476157
ENSG00000044090	CUL7	0.396062	2.62044e-07	4.91451e-06	0.0791388
ENSG00000187017	ESPN	1.70792	2.63199e-07	4.93095e-06	0.406013
ENSG00000167562	ZNF701	-0.389393	2.76939e-07	5.18062e-06	0.0783024
ENSG00000179195	ZNF664	-0.398117	2.7711e-07	5.18062e-06	0.0803034
ENSG00000112339	HBS1L	-0.429025	2.78586e-07	5.20272e-06	0.0863401
ENSG00000164463	CREBRF	-0.536911	2.84013e-07	5.29849e-06	0.112324
ENSG00000127452	FBXL12	0.415248	2.86954e-07	5.34773e-06	0.0838962
ENSG00000272333	KMT2B	0.656331	2.89157e-07	5.38312e-06	0.135474
ENSG00000142303	ADAMTS10	1.11677	2.89887e-07	5.39105e-06	0.247071
ENSG00000125910	S1PR4	1.3075	2.90828e-07	5.39817e-06	0.293268
ENSG00000237330	RNF223	1.84012	2.90879e-07	5.39817e-06	0.388763
ENSG00000179364	PACS2	0.598854	2.97625e-07	5.51758e-06	0.124272
ENSG00000010017	RANBP9	-0.324365	2.98386e-07	5.52591e-06	0.0650043
ENSG00000005483	KMT2E	-0.364069	3.00347e-07	5.55642e-06	0.0729445
ENSG00000162086	ZNF75A	-0.368908	3.02356e-07	5.58775e-06	0.0747116
ENSG00000053371	AKR7A2	0.515932	3.03317e-07	5.59967e-06	0.106882
ENSG00000087088	BAX	0.389846	3.15945e-07	5.82674e-06	0.0784495
ENSG00000136720	HS6ST1	0.658169	3.17884e-07	5.85639e-06	0.138648
ENSG00000164880	INTS1	1.00677	3.2102e-07	5.90803e-06	0.21684
ENSG00000100156	SLC16A8	1.51862	3.22407e-07	5.92741e-06	0.342033
ENSG00000116698	SMG7	-0.373166	3.28279e-07	6.02911e-06	0.0750531
ENSG00000132635	PCED1A	0.687976	3.30469e-07	6.06304e-06	0.146926
ENSG00000143155	TIPRL	-0.387723	3.34562e-07	6.13178e-06	0.0786922
ENSG00000232434	AJM1	1.68867	3.3522e-07	6.1375e-06	0.384023
ENSG00000059145	UNKL	1.08491	3.36892e-07	6.16175e-06	0.234781
ENSG00000057663	ATG5	-0.435984	3.38439e-07	6.18367e-06	0.08965
ENSG00000131791	PRKAB2	-0.362613	3.39672e-07	6.1998e-06	0.0736026
ENSG00000115548	KDM3A	-0.349232	3.40775e-07	6.21353e-06	0.0709431
ENSG00000072958	AP1M1	0.450757	3.43841e-07	6.25657e-06	0.0915552
ENSG00000184261	KCNK12	1.2334	3.4368e-07	6.25657e-06	0.268359
ENSG00000054611	TBC1D22A	0.465208	3.44527e-07	6.25867e-06	0.0962707
ENSG00000142634	EFHD2	0.670235	3.44663e-07	6.25867e-06	0.14103
ENSG00000167964	RAB26	1.33516	3.47909e-07	6.31115e-06	0.295794
ENSG00000071655	MBD3	0.821403	3.50455e-07	6.34434e-06	0.176969
ENSG00000159256	MORC3	-0.483706	3.50305e-07	6.34434e-06	0.0994081
ENSG00000130812	ANGPTL6	1.1529	3.53855e-07	6.39935e-06	0.258996
ENSG00000078142	PIK3C3	-0.328696	3.54855e-07	6.41091e-06	0.0659907
ENSG00000108094	CUL2	-0.319132	3.59063e-07	6.48032e-06	0.0645266
ENSG00000182183	SHISAL2A	0.930713	3.59448e-07	6.48067e-06	0.197812
ENSG00000198315	ZKSCAN8	-0.442099	3.62182e-07	6.52333e-06	0.0917466
ENSG00000109929	SC5D	-0.442399	3.65464e-07	6.57575e-06	0.0918724
ENSG00000205702	CYP2D7	0.623281	3.67987e-07	6.61444e-06	0.129766
ENSG00000099769	IGFALS	1.51986	3.76826e-07	6.76645e-06	0.332221
ENSG00000172775	PSME3IP1	-0.237589	3.89142e-07	6.98053e-06	0.0475822
ENSG00000198276	UCKL1	0.57505	3.91336e-07	7.01279e-06	0.12081
ENSG00000060971	ACAA1	0.376045	3.93553e-07	7.04153e-06	0.0770228
ENSG00000221914	PPP2R2A	-0.37588	3.93734e-07	7.04153e-06	0.0766045
ENSG00000078674	PCM1	-0.371791	3.96789e-07	7.089e-06	0.0756805
ENSG00000175701	MTLN	0.779176	3.98587e-07	7.11395e-06	0.168453
ENSG00000112419	PHACTR2	-0.75695	3.99134e-07	7.11655e-06	0.162243
ENSG00000122490	SLC66A2	0.718028	4.08665e-07	7.27916e-06	0.153159
ENSG00000100567	PSMA3	-0.394245	4.09762e-07	7.29137e-06	0.0812131
ENSG00000141627	DYM	-0.236377	4.10229e-07	7.29237e-06	0.0472774
ENSG00000127580	WDR24	1.06407	4.16624e-07	7.39863e-06	0.233467
ENSG00000115257	PCSK4	1.13475	4.1863e-07	7.4268e-06	0.24672
ENSG00000162576	MXRA8	1.16801	4.19908e-07	7.44203e-06	0.252091
ENSG00000186395	KRT10	0.586063	4.24015e-07	7.5073e-06	0.124399
ENSG00000099875	MKNK2	0.867437	4.27196e-07	7.55609e-06	0.183659
ENSG00000147654	EBAG9	-0.478199	4.32102e-07	7.63524e-06	0.099809
ENSG00000129194	SOX15	1.04067	4.35911e-07	7.69487e-06	0.232532
ENSG00000184343	SRPK3	1.03274	4.398e-07	7.7558e-06	0.225401
ENSG00000134461	ANKRD16	0.885777	4.41767e-07	7.78274e-06	0.189638
ENSG00000173230	GOLGB1	-0.421778	4.56843e-07	8.04034e-06	0.0861659
ENSG00000171169	NAIF1	0.429077	4.57546e-07	8.04474e-06	0.0884152
ENSG00000108443	RPS6KB1	-0.378117	4.58898e-07	8.0605e-06	0.0775531
ENSG00000008086	CDKL5	-0.396594	4.60405e-07	8.07897e-06	0.0815668
ENSG00000163013	FBXO41	0.648395	4.63312e-07	8.12194e-06	0.139502
ENSG00000099330	OCEL1	0.716784	4.6889e-07	8.19967e-06	0.155381
ENSG00000146063	TRIM41	0.528348	4.69134e-07	8.19967e-06	0.110925
ENSG00000160336	ZNF761	-0.463739	4.68567e-07	8.19967e-06	0.0969357
ENSG00000172663	TMEM134	0.649454	4.71426e-07	8.23161e-06	0.138504
ENSG00000148925	BTBD10	-0.416851	4.72018e-07	8.23383e-06	0.0863407
ENSG00000196544	BORCS6	0.62495	4.73861e-07	8.25785e-06	0.132874
ENSG00000141002	TCF25	0.370954	4.76301e-07	8.29222e-06	0.07615
ENSG00000134444	RELCH	-0.273958	4.77159e-07	8.299e-06	0.0557143
ENSG00000204348	DXO	0.315247	4.83021e-07	8.39272e-06	0.0641479
ENSG00000150776	NKAPD1	-0.313107	4.87925e-07	8.46964e-06	0.0638887
ENSG00000197599	CCDC154	0.800532	4.8892e-07	8.4786e-06	0.173118
ENSG00000099385	BCL7C	0.660014	5.00695e-07	8.67431e-06	0.143955
ENSG00000187609	EXD3	1.08278	5.02464e-07	8.69646e-06	0.242483
ENSG00000143437	ARNT	-0.305956	5.03947e-07	8.7136e-06	0.0629645
ENSG00000143222	UFC1	-0.343322	5.06984e-07	8.75757e-06	0.0707948
ENSG00000153922	CHD1	-0.382798	5.10889e-07	8.81644e-06	0.0786404
ENSG00000025800	KPNA6	-0.320697	5.12609e-07	8.83752e-06	0.065778
ENSG00000198830	HMGN2	0.376545	5.19486e-07	8.94737e-06	0.0773423
ENSG00000211769	TRBJ2-5	1.88963	5.3322e-07	9.17501e-06	0.431976
ENSG00000085760	MTIF2	-0.285076	5.41707e-07	9.31145e-06	0.0584073
ENSG00000185122	HSF1	0.813389	5.422e-07	9.31145e-06	0.178087
ENSG00000137500	CCDC90B	-0.336887	5.43089e-07	9.31769e-06	0.0691281
ENSG00000070413	DGCR2	0.480081	5.449e-07	9.33971e-06	0.100565
ENSG00000172354	GNB2	0.666284	5.46558e-07	9.35908e-06	0.142971
ENSG00000163794	UCN	1.275	5.57246e-07	9.53289e-06	0.290824
ENSG00000135457	TFCP2	-0.363686	5.62471e-07	9.61299e-06	0.0752638
ENSG00000176058	TPRN	0.745149	5.63472e-07	9.62083e-06	0.16107
ENSG00000120903	CHRNA2	2.37963	5.64277e-07	9.62529e-06	0.521439
ENSG00000151461	UPF2	-0.376947	5.6747e-07	9.67045e-06	0.077543
ENSG00000146828	SLC12A9	0.536879	5.75501e-07	9.79789e-06	0.113859
ENSG00000058453	CROCC	1.14161	5.82886e-07	9.9141e-06	0.251986
ENSG00000100300	TSPO	1.22603	5.89285e-07	1.00133e-05	0.271924
ENSG00000136717	BIN1	0.535494	5.91966e-07	1.00492e-05	0.114937
ENSG00000118217	ATF6	-0.470335	6.05481e-07	1.02688e-05	0.0993274
ENSG00000168116	KIAA1586	-0.462809	6.07235e-07	1.02887e-05	0.0972821
ENSG00000187961	KLHL17	0.792846	6.13938e-07	1.03924e-05	0.172153
ENSG00000165630	PRPF18	-0.309131	6.14595e-07	1.03936e-05	0.0633649
ENSG00000185515	BRCC3	-0.441654	6.17163e-07	1.0427e-05	0.0926308
ENSG00000081386	ZNF510	-0.484143	6.30885e-07	1.06487e-05	0.10242
ENSG00000181220	ZNF746	0.530422	6.32813e-07	1.06711e-05	0.111874
ENSG00000165689	ENTR1	0.319949	6.37793e-07	1.07449e-05	0.0663527
ENSG00000074855	ANO8	0.892683	6.51248e-07	1.09507e-05	0.196641
ENSG00000176396	EID2	0.557049	6.51069e-07	1.09507e-05	0.118056
ENSG00000111877	MCM9	-0.395774	6.53825e-07	1.09836e-05	0.0832793
ENSG00000111229	ARPC3	-0.548398	6.62754e-07	1.11231e-05	0.118897
ENSG00000100664	EIF5	-0.477444	6.69954e-07	1.12333e-05	0.101685
ENSG00000204525	HLA-C	0.598469	6.77914e-07	1.1356e-05	0.128459
ENSG00000135913	USP37	-0.42887	6.78792e-07	1.136e-05	0.0897569
ENSG00000142546	NOSIP	0.631818	6.88425e-07	1.15103e-05	0.136443
ENSG00000143106	PSMA5	-0.5355	6.89961e-07	1.15251e-05	0.114947
ENSG00000124275	MTRR	-0.317005	6.95836e-07	1.16123e-05	0.0657299
ENSG00000198753	PLXNB3	1.37611	7.19106e-07	1.19894e-05	0.308199
ENSG00000144320	LNPK	-0.54624	7.42763e-07	1.23722e-05	0.118922
ENSG00000162032	SPSB3	2.21429	7.57248e-07	1.26016e-05	0.494889
ENSG00000085741	WNT11	1.35918	7.58437e-07	1.26095e-05	0.315306
ENSG00000261408	TEN1-CDK3	1.02315	7.66045e-07	1.27241e-05	0.230778
ENSG00000064313	TAF2	-0.238131	7.75727e-07	1.28668e-05	0.0490249
ENSG00000105298	CACTIN	0.781222	7.76087e-07	1.28668e-05	0.172304
ENSG00000116977	LGALS8	-0.365448	7.76935e-07	1.28688e-05	0.0761095
ENSG00000033178	UBA6	-0.494737	7.77948e-07	1.28735e-05	0.106589
ENSG00000137955	RABGGTB	-0.407316	7.82274e-07	1.29331e-05	0.0860932
ENSG00000108091	CCDC6	-0.460231	7.8874e-07	1.30278e-05	0.0976594
ENSG00000197136	PCNX3	0.588416	7.89593e-07	1.30297e-05	0.126863
ENSG00000198301	SDAD1	-0.420986	8.00368e-07	1.31953e-05	0.0901053
ENSG00000172009	THOP1	0.79556	8.27336e-07	1.36272e-05	0.178311
ENSG00000117335	CD46	-0.27482	8.43156e-07	1.38679e-05	0.0569949
ENSG00000139574	NPFF	0.941455	8.43512e-07	1.38679e-05	0.211466
ENSG00000196642	RABL6	0.65955	8.47824e-07	1.39258e-05	0.143505
ENSG00000147465	STAR	1.56867	8.56721e-07	1.4059e-05	0.37097
ENSG00000173020	GRK2	0.663312	8.60793e-07	1.41127e-05	0.145901
ENSG00000145833	DDX46	-0.243791	8.63544e-07	1.41447e-05	0.0503724
ENSG00000184967	NOC4L	0.731858	8.79983e-07	1.44007e-05	0.164139
ENSG00000128607	KLHDC10	-0.338253	8.95534e-07	1.46282e-05	0.0707764
ENSG00000196954	CASP4	-0.754708	8.94804e-07	1.46282e-05	0.167236
ENSG00000132676	DAP3	-0.233325	8.96372e-07	1.46284e-05	0.0482864
ENSG00000174953	DHX36	-0.408098	8.98435e-07	1.46485e-05	0.0873375
ENSG00000117360	PRPF3	-0.322975	9.05843e-07	1.47558e-05	0.0675991
ENSG00000133619	KRBA1	0.558841	9.13988e-07	1.48748e-05	0.122444
ENSG00000171492	LRRC8D	-0.415859	9.1765e-07	1.49207e-05	0.0882924
ENSG00000101213	PTK6	0.836612	9.19045e-07	1.49296e-05	0.184277
ENSG00000135452	TSPAN31	-0.372915	9.2495e-07	1.50118e-05	0.0790288
ENSG00000198740	ZNF652	-0.474115	9.26525e-07	1.50236e-05	0.102619
ENSG00000090372	STRN4	0.578982	9.38415e-07	1.52025e-05	0.125512
ENSG00000159753	CARMIL2	0.720942	9.56088e-07	1.54747e-05	0.159343
ENSG00000137760	ALKBH8	-0.436392	9.59339e-07	1.55083e-05	0.0936796
ENSG00000204228	HSD17B8	0.63447	9.59917e-07	1.55083e-05	0.139235
ENSG00000008382	MPND	0.428225	9.64972e-07	1.55758e-05	0.0916431
ENSG00000164934	DCAF13	-0.536364	9.66883e-07	1.55924e-05	0.119137
ENSG00000153827	TRIP12	-0.401148	9.7766e-07	1.57443e-05	0.0859131
ENSG00000221968	FADS3	0.662635	9.78076e-07	1.57443e-05	0.145084
ENSG00000092929	UNC13D	0.618263	9.80744e-07	1.57729e-05	0.135104
ENSG00000214140	PRCD	0.943963	1.00093e-06	1.6083e-05	0.210506
ENSG00000104853	CLPTM1	0.373999	1.04021e-06	1.6699e-05	0.0796439
ENSG00000134001	EIF2S1	-0.380692	1.04345e-06	1.67358e-05	0.0815034
ENSG00000167900	TK1	0.942669	1.05378e-06	1.68862e-05	0.213966
ENSG00000236287	ZBED5	-0.162856	1.0589e-06	1.69529e-05	0.0337523
ENSG00000105135	ILVBL	0.517557	1.06386e-06	1.7017e-05	0.114255
ENSG00000122545	SEPTIN7	-0.43029	1.06895e-06	1.70829e-05	0.0932397
ENSG00000077463	SIRT6	0.689072	1.07574e-06	1.7176e-05	0.152717
ENSG00000179943	FIZ1	0.639303	1.07877e-06	1.72088e-05	0.142921
ENSG00000144224	UBXN4	-0.262111	1.08093e-06	1.72278e-05	0.0548001
ENSG00000127564	PKMYT1	1.17769	1.08565e-06	1.72875e-05	0.275949
ENSG00000158106	RHPN1	1.09739	1.08947e-06	1.73327e-05	0.249392
ENSG00000143207	COP1	-0.365577	1.09071e-06	1.73368e-05	0.0783281
ENSG00000155034	FBXL18	0.752139	1.0934e-06	1.73641e-05	0.170736
ENSG00000100413	POLR3H	0.45412	1.10762e-06	1.75742e-05	0.0988187
ENSG00000131748	STARD3	0.531452	1.11196e-06	1.76272e-05	0.116072
ENSG00000112237	CCNC	-0.478217	1.12381e-06	1.77993e-05	0.104986
ENSG00000095139	ARCN1	-0.282139	1.12837e-06	1.78554e-05	0.0597445
ENSG00000180957	PITPNB	-0.374117	1.13101e-06	1.78813e-05	0.0795572
ENSG00000239306	RBM14	0.341889	1.13237e-06	1.78869e-05	0.07215
ENSG00000159658	EFCAB14	-0.230148	1.13535e-06	1.79179e-05	0.0478748
ENSG00000087157	PGS1	0.457842	1.13732e-06	1.79331e-05	0.0981778
ENSG00000079785	DDX1	-0.364976	1.17378e-06	1.84915e-05	0.0787566
ENSG00000184922	FMNL1	0.413074	1.17777e-06	1.85379e-05	0.0880369
ENSG00000073067	CYP2W1	2.01218	1.18334e-06	1.86089e-05	0.458555
ENSG00000135655	USP15	-0.580226	1.19251e-06	1.87365e-05	0.127192
ENSG00000114742	WDR48	-0.330255	1.19997e-06	1.88322e-05	0.0700398
ENSG00000164713	BRI3	0.96933	1.20072e-06	1.88322e-05	0.217063
ENSG00000116641	DOCK7	-0.425385	1.22173e-06	1.91448e-05	0.0926089
ENSG00000140675	SLC5A2	1.19016	1.23757e-06	1.93587e-05	0.278107
ENSG00000174718	RESF1	-0.597593	1.23653e-06	1.93587e-05	0.130548
ENSG00000175634	RPS6KB2	0.352883	1.2611e-06	1.97093e-05	0.0755842
ENSG00000130758	MAP3K10	0.910918	1.26669e-06	1.97793e-05	0.205442
ENSG00000176108	CHMP6	0.506258	1.27207e-06	1.98459e-05	0.11114
ENSG00000115816	CEBPZ	-0.376222	1.27492e-06	1.98728e-05	0.0812015
ENSG00000090661	CERS4	0.748458	1.2939e-06	2.0151e-05	0.169926
ENSG00000166024	R3HCC1L	-0.509724	1.31394e-06	2.04451e-05	0.113545
ENSG00000088451	TGDS	-0.352981	1.3327e-06	2.07188e-05	0.0760872
ENSG00000131508	UBE2D2	0.209785	1.3388e-06	2.07953e-05	0.0438603
ENSG00000171700	RGS19	0.866881	1.34449e-06	2.08655e-05	0.197856
ENSG00000151422	FER	-0.448625	1.3682e-06	2.12149e-05	0.0979475
ENSG00000104442	ARMC1	-0.33882	1.3741e-06	2.12877e-05	0.0725833
ENSG00000110075	PPP6R3	-0.323252	1.37602e-06	2.12989e-05	0.0689441
ENSG00000161036	LRWD1	0.85153	1.3893e-06	2.14857e-05	0.194985
ENSG00000136146	MED4	-0.379577	1.39317e-06	2.15267e-05	0.0824077
ENSG00000143493	INTS7	-0.415381	1.39868e-06	2.1593e-05	0.0902579
ENSG00000182685	BRICD5	0.900607	1.40247e-06	2.16327e-05	0.209362
ENSG00000102125	TAFAZZIN	0.38118	1.40915e-06	2.17168e-05	0.0821072
ENSG00000164972	C9orf24	1.42489	1.47977e-06	2.27854e-05	0.335694
ENSG00000113391	FAM172A	-0.400161	1.49081e-06	2.29354e-05	0.0869933
ENSG00000067334	DNTTIP2	-0.529521	1.49343e-06	2.29558e-05	0.11755
ENSG00000160072	ATAD3B	0.658578	1.50677e-06	2.31408e-05	0.147855
ENSG00000138031	ADCY3	0.664602	1.51404e-06	2.32323e-05	0.151332
ENSG00000007541	PIGQ	0.586719	1.5176e-06	2.32668e-05	0.13036
ENSG00000196961	AP2A1	0.547247	1.55768e-06	2.38606e-05	0.120224
ENSG00000162521	RBBP4	-0.276537	1.57264e-06	2.4069e-05	0.0591747
ENSG00000205356	TECPR1	0.621706	1.6075e-06	2.45813e-05	0.139636
ENSG00000177283	FZD8	1.54707	1.61775e-06	2.47167e-05	0.35597
ENSG00000261236	BOP1	0.752196	1.62879e-06	2.48639e-05	0.173948
ENSG00000140262	TCF12	-0.36319	1.653e-06	2.52118e-05	0.0781691
ENSG00000100485	SOS2	-0.415413	1.66789e-06	2.5417e-05	0.0900586
ENSG00000176387	HSD11B2	1.78279	1.68411e-06	2.56422e-05	0.418744
ENSG00000149930	TAOK2	0.444651	1.69772e-06	2.58272e-05	0.09702
ENSG00000156875	MFSD14A	0.819707	1.70333e-06	2.58903e-05	0.187561
ENSG00000203782	LORICRIN	1.76418	1.71063e-06	2.5979e-05	0.426051
ENSG00000158402	CDC25C	2.21912	1.72375e-06	2.61559e-05	0.53101
ENSG00000161847	RAVER1	0.959683	1.75055e-06	2.65397e-05	0.223085
ENSG00000181045	SLC26A11	0.821776	1.76735e-06	2.67357e-05	0.18733
ENSG00000186564	FOXD2	0.973722	1.76567e-06	2.67357e-05	0.230503
ENSG00000234965	SHISA8	2.72017	1.768e-06	2.67357e-05	0.689196
ENSG00000122376	SHLD2	-0.464711	1.77692e-06	2.68477e-05	0.103563
ENSG00000189164	ZNF527	-0.421052	1.8065e-06	2.72714e-05	0.0923943
ENSG00000108469	RECQL5	0.401217	1.81021e-06	2.73041e-05	0.087274
ENSG00000128915	ICE2	-0.298206	1.83212e-06	2.76111e-05	0.064481
ENSG00000121680	PEX16	0.471258	1.8386e-06	2.76852e-05	0.104302
ENSG00000164172	MOCS2	-0.328329	1.8677e-06	2.80995e-05	0.0710069
ENSG00000095066	HOOK2	0.544645	1.87645e-06	2.8201e-05	0.120391
ENSG00000162441	LZIC	-0.322212	1.87762e-06	2.8201e-05	0.0699645
ENSG00000116747	RO60	-0.439339	1.88705e-06	2.83185e-05	0.0966322
ENSG00000005801	ZNF195	-0.249225	1.89062e-06	2.83481e-05	0.0532452
ENSG00000162341	TPCN2	0.649852	1.90823e-06	2.85774e-05	0.147027
ENSG00000188747	NOXA1	1.20666	1.90914e-06	2.85774e-05	0.294181
ENSG00000163946	TASOR	-0.352713	1.97254e-06	2.95015e-05	0.0758484
ENSG00000156026	MCU	-0.304683	1.98045e-06	2.95949e-05	0.0657679
ENSG00000172247	C1QTNF4	3.06644	1.99732e-06	2.98218e-05	0.722474
ENSG00000011132	APBA3	0.664746	2.00361e-06	2.98906e-05	0.151102
ENSG00000160284	SPATC1L	1.44192	2.02363e-06	3.01612e-05	0.362319
ENSG00000169635	HIC2	0.569937	2.02515e-06	3.01612e-05	0.127789
ENSG00000125520	SLC2A4RG	0.939581	2.071e-06	3.08108e-05	0.226253
ENSG00000182858	ALG12	0.394214	2.07225e-06	3.08108e-05	0.0868211
ENSG00000113575	PPP2CA	0.472904	2.08277e-06	3.09162e-05	0.105052
ENSG00000156256	USP16	-0.454871	2.08283e-06	3.09162e-05	0.102569
ENSG00000186994	KANK3	1.6803	2.08708e-06	3.09535e-05	0.408879
ENSG00000011007	ELOA	-0.291867	2.08962e-06	3.09652e-05	0.0632616
ENSG00000071564	TCF3	0.830551	2.095e-06	3.1001e-05	0.192573
ENSG00000077232	DNAJC10	-0.372014	2.09729e-06	3.1001e-05	0.0813914
ENSG00000196365	LONP1	0.553264	2.09669e-06	3.1001e-05	0.125526
ENSG00000012211	PRICKLE3	0.85491	2.10261e-06	3.10279e-05	0.200163
ENSG00000126603	GLIS2	0.758279	2.10128e-06	3.10279e-05	0.176998
ENSG00000125449	ARMC7	0.506375	2.1209e-06	3.12719e-05	0.114312
ENSG00000156983	BRPF1	0.343424	2.12416e-06	3.12938e-05	0.0753588
ENSG00000117020	AKT3	-0.451364	2.12946e-06	3.13459e-05	0.101341
ENSG00000099889	ARVCF	0.910445	2.15648e-06	3.16909e-05	0.209561
ENSG00000143164	DCAF6	-0.355772	2.15599e-06	3.16909e-05	0.0778961
ENSG00000103174	NAGPA	0.46394	2.16407e-06	3.17761e-05	0.10375
ENSG00000069509	FUNDC1	-0.550904	2.17644e-06	3.19314e-05	0.126325
ENSG00000141012	GALNS	0.493536	2.18151e-06	3.19792e-05	0.10853
ENSG00000169026	SLC49A3	1.17928	2.18513e-06	3.20058e-05	0.277361
ENSG00000126261	UBA2	-0.275681	2.21642e-06	3.24373e-05	0.060009
ENSG00000059915	PSD	1.04282	2.22916e-06	3.257e-05	0.243504
ENSG00000187690	EZHIP	1.49835	2.22806e-06	3.257e-05	0.364008
ENSG00000141428	C18orf21	-0.534833	2.23445e-06	3.26204e-05	0.122549
ENSG00000100038	TOP3B	1.08106	2.2378e-06	3.26425e-05	0.259345
ENSG00000184110	EIF3C	0.872171	2.24974e-06	3.27896e-05	0.207322
ENSG00000001629	ANKIB1	-0.374516	2.26264e-06	3.29506e-05	0.0820408
ENSG00000060339	CCAR1	-0.266406	2.28011e-06	3.31777e-05	0.0574189
ENSG00000119707	RBM25	-0.294941	2.30148e-06	3.34611e-05	0.063801
ENSG00000147144	CCDC120	0.736003	2.31706e-06	3.36601e-05	0.17003
ENSG00000259224	SLC35G6	1.43227	2.32563e-06	3.37569e-05	0.350659
ENSG00000185361	TNFAIP8L1	0.741716	2.32891e-06	3.37768e-05	0.173062
ENSG00000116266	STXBP3	-0.416194	2.33929e-06	3.38997e-05	0.0923638
ENSG00000070770	CSNK2A2	-0.281477	2.36327e-06	3.42191e-05	0.0610264
ENSG00000178913	TAF7	-0.405718	2.37903e-06	3.44192e-05	0.0906763
ENSG00000072195	SPEG	1.0863	2.39371e-06	3.46034e-05	0.257544
ENSG00000174851	YIF1A	0.51815	2.41432e-06	3.48728e-05	0.11764
ENSG00000169727	GPS1	0.512551	2.41992e-06	3.49253e-05	0.117421
ENSG00000109736	MFSD10	0.827895	2.47967e-06	3.57585e-05	0.194064
ENSG00000118246	FASTKD2	-0.469194	2.49845e-06	3.6e-05	0.107713
ENSG00000136381	IREB2	-0.300885	2.5168e-06	3.62349e-05	0.0657448
ENSG00000169592	INO80E	0.539614	2.53042e-06	3.64015e-05	0.12304
ENSG00000167967	E4F1	0.813341	2.53665e-06	3.64615e-05	0.191313
ENSG00000178342	KCNG2	3.06088	2.56197e-06	3.67956e-05	0.744171
ENSG00000023041	ZDHHC6	-0.289533	2.57024e-06	3.68844e-05	0.0627915
ENSG00000138802	SEC24B	-0.396234	2.57315e-06	3.68964e-05	0.0877213
ENSG00000237172	B3GNT9	1.02459	2.57776e-06	3.69327e-05	0.246852
ENSG00000006715	VPS41	-0.377197	2.58153e-06	3.69567e-05	0.0837953
ENSG00000173889	PHC3	-0.364222	2.59898e-06	3.71765e-05	0.0802821
ENSG00000160877	NACC1	0.913568	2.62065e-06	3.74563e-05	0.215931
ENSG00000141965	FEM1A	0.724854	2.64747e-06	3.77787e-05	0.169675
ENSG00000146830	GIGYF1	0.572448	2.64535e-06	3.77787e-05	0.131482
ENSG00000127081	ZNF484	-0.462445	2.66218e-06	3.7958e-05	0.10551
ENSG00000254901	BORCS8	0.360691	2.68484e-06	3.82503e-05	0.0793634
ENSG00000177548	RABEP2	0.772254	2.69616e-06	3.83807e-05	0.181228
ENSG00000119402	FBXW2	-0.266793	2.70702e-06	3.85045e-05	0.0583649
ENSG00000067596	DHX8	-0.267778	2.73321e-06	3.88458e-05	0.0584898
ENSG00000165392	WRN	-0.423402	2.73594e-06	3.88534e-05	0.0949751
ENSG00000186111	PIP5K1C	0.733606	2.74494e-06	3.895e-05	0.170535
ENSG00000155085	AK9	-0.56979	2.75058e-06	3.89988e-05	0.130624
ENSG00000134056	MRPS36	-0.432659	2.76269e-06	3.91393e-05	0.0979078
ENSG00000184575	XPOT	-0.292778	2.76849e-06	3.91901e-05	0.0641006
ENSG00000108061	SHOC2	-0.405594	2.79924e-06	3.95937e-05	0.0903867
ENSG00000103121	CMC2	-0.530773	2.80341e-06	3.9621e-05	0.121737
ENSG00000103148	NPRL3	0.51528	2.83188e-06	3.99916e-05	0.11604
ENSG00000074370	ATP2A3	0.671097	2.84662e-06	4.01678e-05	0.156775
ENSG00000135829	DHX9	-0.269974	2.86683e-06	4.04207e-05	0.0592129
ENSG00000135521	LTV1	-0.536225	2.87283e-06	4.04731e-05	0.123585
ENSG00000171703	TCEA2	0.665494	2.88142e-06	4.05297e-05	0.155184
ENSG00000200087	SNORA73B	1.24419	2.88025e-06	4.05297e-05	0.304122
ENSG00000156521	TYSND1	0.599099	2.88522e-06	4.05509e-05	0.137648
ENSG00000258890	CEP95	-0.357275	2.92382e-06	4.10609e-05	0.0804012
ENSG00000143256	PFDN2	0.392882	2.94841e-06	4.13081e-05	0.08802
ENSG00000167701	GPT	1.17562	2.94764e-06	4.13081e-05	0.290746
ENSG00000196683	TOMM7	-0.584637	2.94522e-06	4.13081e-05	0.137098
ENSG00000071073	MGAT4A	-0.517788	2.96855e-06	4.15428e-05	0.118978
ENSG00000130818	ZNF426	-0.426521	2.96985e-06	4.15428e-05	0.0968445
ENSG00000157181	ODR4	-0.417209	2.98395e-06	4.17071e-05	0.0942708
ENSG00000007047	MARK4	0.640524	3.04956e-06	4.25584e-05	0.147086
ENSG00000062650	WAPL	-0.288026	3.04966e-06	4.25584e-05	0.0630764
ENSG00000166326	TRIM44	-0.245225	3.05833e-06	4.26458e-05	0.0532969
ENSG00000120526	NUDCD1	-0.590691	3.06405e-06	4.26919e-05	0.137552
ENSG00000100852	ARHGAP5	-0.464044	3.09191e-06	4.30462e-05	0.105449
ENSG00000013561	RNF14	-0.350191	3.11681e-06	4.33292e-05	0.0783058
ENSG00000129245	FXR2	0.397308	3.11712e-06	4.33292e-05	0.0884802
ENSG00000164167	LSM6	-0.342949	3.12694e-06	4.34316e-05	0.0765663
ENSG00000135637	CCDC142	0.409882	3.17438e-06	4.40215e-05	0.0922762
ENSG00000224940	PRRT4	1.45474	3.17349e-06	4.40215e-05	0.358031
ENSG00000055208	TAB2	-0.392504	3.17789e-06	4.40358e-05	0.0909722
ENSG00000176715	ACSF3	0.313735	3.1948e-06	4.42354e-05	0.0690493
ENSG00000151292	CSNK1G3	-0.449881	3.20939e-06	4.44029e-05	0.102124
ENSG00000165684	SNAPC4	0.703384	3.21686e-06	4.44714e-05	0.163727
ENSG00000138246	DNAJC13	-0.504346	3.24047e-06	4.47629e-05	0.11515
ENSG00000103363	ELOB	0.504455	3.24977e-06	4.48564e-05	0.11678
ENSG00000136758	YME1L1	-0.336825	3.26283e-06	4.50017e-05	0.0751349
ENSG00000162664	ZNF326	-0.31704	3.2901e-06	4.53426e-05	0.0703729
ENSG00000014919	COX15	-0.337115	3.30047e-06	4.545e-05	0.0748407
ENSG00000137055	PLAA	-0.516264	3.31894e-06	4.56689e-05	0.120553
ENSG00000148341	SH3GLB2	0.499427	3.32552e-06	4.5724e-05	0.114667
ENSG00000275074	NUDT18	0.684792	3.33013e-06	4.57518e-05	0.159604
ENSG00000140323	DISP2	0.817718	3.33998e-06	4.58517e-05	0.195453
ENSG00000149476	TKFC	0.453716	3.3511e-06	4.59687e-05	0.102146
ENSG00000009844	VTA1	-0.249999	3.37176e-06	4.62164e-05	0.0549511
ENSG00000164162	ANAPC10	-0.541805	3.39961e-06	4.65277e-05	0.124814
ENSG00000198435	NRARP	1.24031	3.39973e-06	4.65277e-05	0.316643
ENSG00000099904	ZDHHC8	0.766667	3.4266e-06	4.68592e-05	0.182548
ENSG00000116127	ALMS1	-0.47264	3.43161e-06	4.68916e-05	0.10858
ENSG00000105576	TNPO2	0.250356	3.43715e-06	4.69311e-05	0.0550797
ENSG00000182327	GLTPD2	1.63476	3.45763e-06	4.71744e-05	0.39243
ENSG00000111786	SRSF9	0.210602	3.46735e-06	4.72706e-05	0.0458287
ENSG00000260729		1.16033	3.48537e-06	4.74798e-05	0.288288
ENSG00000147669	POLR2K	-0.47236	3.51664e-06	4.7869e-05	0.109534
ENSG00000130305	NSUN5	0.430152	3.5197e-06	4.78738e-05	0.09774
ENSG00000115239	ASB3	-0.415683	3.52612e-06	4.79245e-05	0.0936393
ENSG00000197858	GPAA1	0.708008	3.55155e-06	4.8233e-05	0.169505
ENSG00000125534	PPDPF	1.49536	3.59412e-06	4.87738e-05	0.365829
ENSG00000198899	MT-ATP6	-0.57339	3.59877e-06	4.87996e-05	0.135524
ENSG00000114098	ARMC8	-0.264856	3.60161e-06	4.88008e-05	0.0585058
ENSG00000175054	ATR	-0.44067	3.63721e-06	4.92455e-05	0.100713
ENSG00000012660	ELOVL5	-0.436974	3.6711e-06	4.96289e-05	0.100454
ENSG00000284730	TMDD1	3.39709	3.67113e-06	4.96289e-05	0.876905
ENSG00000144589	STK11IP	0.324863	3.68586e-06	4.97521e-05	0.0723388
ENSG00000181830	SLC35C1	0.385619	3.68377e-06	4.97521e-05	0.0873805
ENSG00000078177	N4BP2	-0.372352	3.69709e-06	4.98657e-05	0.0834628
ENSG00000080824	HSP90AA1	-0.502855	3.71494e-06	5.00684e-05	0.114527
ENSG00000166200	COPS2	-0.416516	3.71835e-06	5.00762e-05	0.0959451
ENSG00000006638	TBXA2R	2.0107	3.7506e-06	5.03957e-05	0.488705
ENSG00000088038	CNOT3	0.452543	3.74975e-06	5.03957e-05	0.10274
ENSG00000164253	WDR41	-0.503746	3.75033e-06	5.03957e-05	0.115773
ENSG00000100445	SDR39U1	0.605734	3.78893e-06	5.08721e-05	0.140456
ENSG00000164414	SLC35A1	-0.693186	3.8141e-06	5.11713e-05	0.163563
ENSG00000177169	ULK1	0.695688	3.85126e-06	5.15966e-05	0.163715
ENSG00000244476	ERVFRD-1	2.4112	3.85162e-06	5.15966e-05	0.597544
ENSG00000185730	ZNF696	0.844599	3.8645e-06	5.173e-05	0.205713
ENSG00000171988	JMJD1C	-0.562339	3.89258e-06	5.20666e-05	0.132395
ENSG00000104517	UBR5	-0.22008	3.93161e-06	5.25489e-05	0.0482303
ENSG00000125503	PPP1R12C	0.659447	3.96477e-06	5.29523e-05	0.156627
ENSG00000143184	XCL1	-1.24534	3.97502e-06	5.30492e-05	0.319436
ENSG00000136371	MTHFS	1.31696	4.00455e-06	5.3403e-05	0.341345
ENSG00000165219	GAPVD1	-0.382623	4.01208e-06	5.34633e-05	0.0864495
ENSG00000285480	H2BK1	0.995865	4.0224e-06	5.35605e-05	0.24373
ENSG00000167716	WDR81	0.684312	4.02678e-06	5.35785e-05	0.16393
ENSG00000104979	C19orf53	0.501827	4.05263e-06	5.3882e-05	0.116877
ENSG00000169758	TMEM266	0.833424	4.05775e-06	5.39096e-05	0.203144
ENSG00000071243	ING3	-0.357706	4.12739e-06	5.47938e-05	0.0805883
ENSG00000105401	CDC37	0.400446	4.21112e-06	5.58636e-05	0.0909325
ENSG00000269343	ZNF587B	-0.44377	4.22796e-06	5.6045e-05	0.102471
ENSG00000141959	PFKL	0.569686	4.24214e-06	5.61489e-05	0.134393
ENSG00000171867	PRNP	-0.379487	4.23941e-06	5.61489e-05	0.087156
ENSG00000160285	LSS	0.540051	4.2535e-06	5.62573e-05	0.125564
ENSG00000132017	DCAF15	0.548686	4.25986e-06	5.62995e-05	0.128731
ENSG00000137871	ZNF280D	-0.462486	4.27232e-06	5.64139e-05	0.106319
ENSG00000167595	PROSER3	0.341713	4.27489e-06	5.64139e-05	0.0767529
ENSG00000005206	SPPL2B	0.923245	4.32695e-06	5.7016e-05	0.222504
ENSG00000089639	GMIP	0.626827	4.32471e-06	5.7016e-05	0.147846
ENSG00000134480	CCNH	-0.426663	4.33222e-06	5.70431e-05	0.0978244
ENSG00000169567	HINT1	-0.396125	4.38288e-06	5.76672e-05	0.0905887
ENSG00000134490	TMEM241	0.676605	4.39523e-06	5.77869e-05	0.160123
ENSG00000116209	TMEM59	-0.336028	4.42346e-06	5.80718e-05	0.0762803
ENSG00000141564	RPTOR	0.531927	4.42273e-06	5.80718e-05	0.12261
ENSG00000167470	MIDN	0.73915	4.43511e-06	5.81816e-05	0.179125
ENSG00000183479	TREX2	0.920041	4.44977e-06	5.82447e-05	0.224979
ENSG00000185112	FAM43A	1.50874	4.44405e-06	5.82447e-05	0.38772
ENSG00000241343	RPL36A	-0.469166	4.44694e-06	5.82447e-05	0.108119
ENSG00000074276	CDHR2	0.978149	4.53226e-06	5.92806e-05	0.244867
ENSG00000152683	SLC30A6	-0.407845	4.56095e-06	5.96119e-05	0.0935887
ENSG00000146205	ANO7	1.51703	4.61984e-06	6.03371e-05	0.374713
ENSG00000161011	SQSTM1	0.672856	4.65111e-06	6.07007e-05	0.158637
ENSG00000105429	MEGF8	0.710053	4.66121e-06	6.07876e-05	0.169377
ENSG00000138346	DNA2	-0.562074	4.66462e-06	6.07876e-05	0.133767
ENSG00000105270	CLIP3	0.730566	4.70959e-06	6.13285e-05	0.17809
ENSG00000185246	PRPF39	-0.311633	4.78441e-06	6.22571e-05	0.0699122
ENSG00000089022	MAPKAPK5	-0.243854	4.80812e-06	6.25197e-05	0.0544994
ENSG00000092439	TRPM7	-0.39558	4.83109e-06	6.27723e-05	0.0899943
ENSG00000104299	INTS9	-0.249525	4.87463e-06	6.32917e-05	0.0557385
ENSG00000137714	FDX1	0.810823	4.89463e-06	6.34583e-05	0.194431
ENSG00000164970	FAM219A	0.441024	4.89334e-06	6.34583e-05	0.100832
ENSG00000175040	CHST2	0.923196	4.97792e-06	6.44528e-05	0.221707
ENSG00000264493	MIR4298	1.51851	4.97861e-06	6.44528e-05	0.391325
ENSG00000109501	WFS1	0.882225	4.98233e-06	6.44539e-05	0.212573
ENSG00000071889	FAM3A	0.598448	4.9952e-06	6.45733e-05	0.143208
ENSG00000136807	CDK9	0.356722	5.01671e-06	6.47568e-05	0.0813481
ENSG00000174915	PTDSS2	0.525111	5.01643e-06	6.47568e-05	0.122489
ENSG00000101882	NKAP	-0.38148	5.09096e-06	6.56335e-05	0.087305
ENSG00000103342	GSPT1	-0.281547	5.09203e-06	6.56335e-05	0.0637055
ENSG00000100796	PPP4R3A	-0.252265	5.10962e-06	6.58124e-05	0.05633
ENSG00000014138	POLA2	0.448799	5.13428e-06	6.6082e-05	0.103366
ENSG00000176209	SMIM19	-0.40938	5.16422e-06	6.6419e-05	0.0953468
ENSG00000130638	ATXN10	-0.361734	5.18038e-06	6.65786e-05	0.0834413
ENSG00000110697	PITPNM1	0.75109	5.19806e-06	6.66325e-05	0.181121
ENSG00000126767	ELK1	0.47667	5.19961e-06	6.66325e-05	0.110861
ENSG00000132470	ITGB4	1.11037	5.19472e-06	6.66325e-05	0.278252
ENSG00000136436	CALCOCO2	-0.544059	5.18993e-06	6.66325e-05	0.128012
ENSG00000198728	LDB1	0.380604	5.23176e-06	6.6996e-05	0.0877604
ENSG00000148672	GLUD1	-0.377787	5.24332e-06	6.70956e-05	0.0872697
ENSG00000161835	TAMALIN	1.00585	5.26065e-06	6.72687e-05	0.257824
ENSG00000103653	CSK	0.533323	5.30565e-06	6.77952e-05	0.125027
ENSG00000171159	BBLN	1.04675	5.31517e-06	6.78679e-05	0.263766
ENSG00000074603	DPP8	-0.275236	5.33815e-06	6.81123e-05	0.0623348
ENSG00000005007	UPF1	0.485637	5.34976e-06	6.82114e-05	0.114365
ENSG00000282936		0.634004	5.37906e-06	6.85356e-05	0.152099
ENSG00000167799	NUDT8	1.38353	5.44752e-06	6.9358e-05	0.359563
ENSG00000197162	ZNF785	0.470862	5.49634e-06	6.99294e-05	0.108965
ENSG00000105373	NOP53	0.954602	5.55223e-06	7.05898e-05	0.238184
ENSG00000023734	STRAP	-0.418759	5.61431e-06	7.13279e-05	0.0990675
ENSG00000146757	ZNF92	-0.398938	5.67343e-06	7.20274e-05	0.0920568
ENSG00000138606	SHF	0.781568	5.72966e-06	7.26372e-05	0.194534
ENSG00000171204	TMEM126B	-0.363181	5.72559e-06	7.26372e-05	0.0834834
ENSG00000127419	TMEM175	0.698376	5.74677e-06	7.27518e-05	0.171841
ENSG00000136897	MRPL50	-0.422263	5.74691e-06	7.27518e-05	0.0989129
ENSG00000023228	NDUFS1	-0.262203	5.75142e-06	7.27569e-05	0.0599022
ENSG00000106404	CLDN15	0.40016	5.84637e-06	7.39053e-05	0.0931326
ENSG00000055917	PUM2	-0.27628	5.85433e-06	7.39531e-05	0.0622879
ENSG00000103199	ZNF500	0.527419	5.87239e-06	7.41284e-05	0.124526
ENSG00000146463	ZMYM4	-0.359403	5.88742e-06	7.42652e-05	0.0820784
ENSG00000168264	IRF2BP2	0.52857	5.90434e-06	7.44258e-05	0.122614
ENSG00000167635	ZNF146	-0.449971	5.93339e-06	7.47387e-05	0.106834
ENSG00000185049	NELFA	0.580116	5.99443e-06	7.5454e-05	0.138689
ENSG00000184163	C1QTNF12	1.02934	6.10435e-06	7.67831e-05	0.259723
ENSG00000112406	HECA	-0.391709	6.16092e-06	7.74397e-05	0.0921116
ENSG00000106305	AIMP2	0.481897	6.16678e-06	7.74584e-05	0.114447
ENSG00000156976	EIF4A2	-0.337975	6.18621e-06	7.76475e-05	0.0775253
ENSG00000186891	TNFRSF18	1.32744	6.19873e-06	7.77495e-05	0.339388
ENSG00000140718	FTO	-0.362656	6.20557e-06	7.77803e-05	0.084175
ENSG00000127603	MACF1	-0.298905	6.26747e-06	7.85006e-05	0.0675857
ENSG00000111237	VPS29	-0.341465	6.2945e-06	7.87279e-05	0.0784056
ENSG00000160959	LRRC14	0.466171	6.29048e-06	7.87279e-05	0.109331
ENSG00000110958	PTGES3	-0.396873	6.32801e-06	7.89798e-05	0.0921815
ENSG00000152454	ZNF256	-0.627878	6.32668e-06	7.89798e-05	0.152333
ENSG00000198730	CTR9	-0.203914	6.32075e-06	7.89798e-05	0.0457329
ENSG00000159140	SON	-0.256834	6.33862e-06	7.90566e-05	0.0579122
ENSG00000111142	METAP2	-0.375925	6.3862e-06	7.95939e-05	0.0881491
ENSG00000121775	TMEM39B	0.46158	6.43264e-06	8.01164e-05	0.109095
ENSG00000135211	TMEM60	-0.502589	6.46052e-06	8.03624e-05	0.119035
ENSG00000198569	SLC34A3	1.47889	6.46146e-06	8.03624e-05	0.408389
ENSG00000254996	ANKHD1-EIF4EBP3	-0.466661	6.48271e-06	8.05702e-05	0.110153
ENSG00000135686	KLHL36	0.326137	6.5022e-06	8.07557e-05	0.0751217
ENSG00000111596	CNOT2	-0.371516	6.56294e-06	8.14531e-05	0.0862473
ENSG00000197912	SPG7	0.314039	6.61754e-06	8.20732e-05	0.0722861
ENSG00000100197	CYP2D6	0.709843	6.63437e-06	8.22245e-05	0.17454
ENSG00000083838	ZNF446	0.584522	6.66244e-06	8.25146e-05	0.141948
ENSG00000127054	INTS11	0.44274	6.68073e-06	8.26833e-05	0.103763
ENSG00000185187	SIGIRR	0.848559	6.6997e-06	8.28602e-05	0.211097
ENSG00000242802	AP5Z1	0.675699	6.70605e-06	8.2881e-05	0.16579
ENSG00000185504	FAAP100	0.65559	6.76022e-06	8.34923e-05	0.160496
ENSG00000114654	EFCC1	1.85976	6.79027e-06	8.38049e-05	0.478832
ENSG00000159459	UBR1	-0.350002	6.8154e-06	8.40566e-05	0.0807407
ENSG00000130881	LRP3	1.49668	6.89842e-06	8.50213e-05	0.411666
ENSG00000197062	ZSCAN26	-0.515368	6.92024e-06	8.5231e-05	0.124673
ENSG00000171681	ATF7IP	-0.491398	6.95082e-06	8.55482e-05	0.116602
ENSG00000149243	KLHL35	1.23324	7.083e-06	8.71145e-05	0.329427
ENSG00000165359	INTS6L	-0.431744	7.09064e-06	8.7148e-05	0.101664
ENSG00000172831	CES2	0.254053	7.12949e-06	8.75647e-05	0.0577313
ENSG00000166823	MESP1	1.80899	7.14245e-06	8.76632e-05	0.475845
ENSG00000100425	BRD1	0.454072	7.17383e-06	8.79874e-05	0.10756
ENSG00000106258	CYP3A5	-0.444596	7.21959e-06	8.84874e-05	0.10476
ENSG00000063176	SPHK2	0.711377	7.25675e-06	8.88814e-05	0.176553
ENSG00000197457	STMN3	0.860499	7.30963e-06	8.94672e-05	0.216923
ENSG00000099326	MZF1	0.436612	7.31584e-06	8.94814e-05	0.102361
ENSG00000142655	PEX14	0.484841	7.33693e-06	8.96775e-05	0.115337
ENSG00000162191	UBXN1	0.344989	7.34986e-06	8.97737e-05	0.0801314
ENSG00000140955	ADAD2	2.38635	7.36286e-06	8.98705e-05	0.621936
ENSG00000147687	TATDN1	-0.423372	7.3876e-06	9.00622e-05	0.100246
ENSG00000178404	CEP295NL	1.07969	7.38873e-06	9.00622e-05	0.275266
ENSG00000185163	DDX51	0.434694	7.40869e-06	9.02435e-05	0.102982
ENSG00000117523	PRRC2C	-0.311302	7.50644e-06	9.13085e-05	0.07128
ENSG00000142186	SCYL1	0.349034	7.5015e-06	9.13085e-05	0.0809591
ENSG00000168286	THAP11	0.417367	7.51822e-06	9.13891e-05	0.0984358
ENSG00000037757	MRI1	0.831053	7.55612e-06	9.17869e-05	0.205569
ENSG00000136490	LIMD2	0.849912	7.62963e-06	9.26164e-05	0.215772
ENSG00000006634	DBF4	-0.353596	7.65712e-06	9.28865e-05	0.0830189
ENSG00000142327	RNPEPL1	0.603863	7.7195e-06	9.35792e-05	0.148174
ENSG00000115947	ORC4	-0.330803	7.7646e-06	9.40615e-05	0.076643
ENSG00000184640	SEPTIN9	0.458876	7.83657e-06	9.48686e-05	0.10875
ENSG00000205090	TMEM240	1.50761	7.86999e-06	9.5208e-05	0.391595
ENSG00000131196	NFATC1	0.602535	7.90545e-06	9.55061e-05	0.146217
ENSG00000166822	TMEM170A	-0.397933	7.91079e-06	9.55061e-05	0.0934441
ENSG00000197114	ZGPAT	0.63463	7.90119e-06	9.55061e-05	0.15352
ENSG00000141994	DUS3L	0.565276	7.97754e-06	9.62463e-05	0.138263
ENSG00000170471	RALGAPB	-0.277974	8.06e-06	9.71751e-05	0.0636058
ENSG00000170779	CDCA4	0.653128	8.0724e-06	9.72585e-05	0.164375
ENSG00000104728	ARHGEF10	0.164261	8.10823e-06	9.76237e-05	0.198955
ENSG00000121316	PLBD1	-0.981052	8.14956e-06	9.80547e-05	0.258545
ENSG00000197363	ZNF517	0.606181	8.16677e-06	9.81952e-05	0.147892
ENSG00000144747	TMF1	-0.282596	8.23877e-06	9.89937e-05	0.0662409
ENSG00000110046	ATG2A	0.713274	8.24881e-06	9.90471e-05	0.176052
ENSG00000174871	CNIH2	0.838718	8.29353e-06	9.95167e-05	0.214834
ENSG00000126522	ASL	0.474865	8.3548e-06	0.000100184	0.113716
ENSG00000187535	IFT140	0.602382	8.40346e-06	0.0001007	0.145092
ENSG00000135972	MRPS9	-0.440929	8.50529e-06	0.000101851	0.105495
ENSG00000198870	STKLD1	0.913852	8.56985e-06	0.000102555	0.231626
ENSG00000101255	TRIB3	0.661277	8.61237e-06	0.000102994	0.162724
ENSG00000072071	ADGRL1	0.667122	8.65011e-06	0.000103167	0.164441
ENSG00000156928	MALSU1	0.320105	8.63864e-06	0.000103167	0.074578
ENSG00000167281	RBFOX3	1.03029	8.64635e-06	0.000103167	0.2635
ENSG00000179598	PLD6	0.8168	8.64946e-06	0.000103167	0.209049
ENSG00000111647	BLTP3B	-0.482568	8.65876e-06	0.000103201	0.115743
ENSG00000165175	MID1IP1	0.80344	8.80311e-06	0.00010485	0.208686
ENSG00000122971	ACADS	0.60566	8.8114e-06	0.000104879	0.148155
ENSG00000103335	PIEZO1	0.641477	8.89839e-06	0.000105843	0.161789
ENSG00000072609	CHFR	0.376761	8.91018e-06	0.000105912	0.088296
ENSG00000197562	RAB40C	0.763085	9.01846e-06	0.000107128	0.191016
ENSG00000205250	E2F4	0.295607	9.09326e-06	0.000107944	0.0686311
ENSG00000078902	TOLLIP	0.590078	9.17607e-06	0.000108708	0.145176
ENSG00000162783	IER5	0.711436	9.17401e-06	0.000108708	0.17404
ENSG00000185721	DRG1	-0.330412	9.16898e-06	0.000108708	0.0777744
ENSG00000164024	METAP1	-0.324157	9.20906e-06	0.000109026	0.0760766
ENSG00000110367	DDX6	-0.365565	9.23828e-06	0.000109299	0.086539
ENSG00000101126	ADNP	-0.300729	9.25632e-06	0.000109439	0.0698168
ENSG00000211638	IGLV8-61	2.72642	9.32135e-06	0.000110135	0.679215
ENSG00000069869	NEDD4	-0.73141	9.42984e-06	0.000111268	0.188836
ENSG00000149527	PLCH2	1.02431	9.42681e-06	0.000111268	0.260127
ENSG00000012983	MAP4K5	-0.439796	9.481e-06	0.000111798	0.105895
ENSG00000188529	SRSF10	-0.333397	9.5191e-06	0.000112172	0.0781981
ENSG00000141446	ESCO1	-0.512416	9.53939e-06	0.000112337	0.12617
ENSG00000187650	VMAC	0.5166	9.55875e-06	0.00011249	0.125298
ENSG00000011451	WIZ	0.639747	9.58548e-06	0.00011273	0.159696
ENSG00000101574	METTL4	-0.397017	9.61997e-06	0.000112998	0.0941168
ENSG00000105221	AKT2	0.345997	9.62105e-06	0.000112998	0.0813289
ENSG00000003509	NDUFAF7	-0.258534	9.63394e-06	0.000113074	0.0597909
ENSG00000207574	MIR661	2.1208	9.64229e-06	0.000113098	0.580751
ENSG00000001167	NFYA	-0.424914	9.70231e-06	0.000113726	0.101779
ENSG00000124459	ZNF45	-0.371538	9.74022e-06	0.00011405	0.0874586
ENSG00000133112	TPT1	-0.586328	9.74278e-06	0.00011405	0.147172
ENSG00000130513	GDF15	2.15114	9.78712e-06	0.000114493	0.603665
ENSG00000149499	EML3	0.612542	9.79507e-06	0.000114511	0.152287
ENSG00000138663	COPS4	-0.376548	9.84532e-06	0.000115022	0.0901406
ENSG00000094880	CDC23	-0.277489	9.86007e-06	0.000115119	0.0648511
ENSG00000099899	TRMT2A	0.494491	9.87187e-06	0.000115157	0.121618
ENSG00000155876	RRAGA	0.277926	9.87634e-06	0.000115157	0.0642902
ENSG00000100883	SRP54	-0.324054	9.89836e-06	0.000115338	0.0762623
ENSG00000120686	UFM1	-0.437258	9.98689e-06	0.000116293	0.105885
ENSG00000133256	PDE6B	0.567677	1.00038e-05	0.000116413	0.139313
ENSG00000196437	ZNF569	-0.520739	1.00299e-05	0.000116641	0.126926
ENSG00000146007	ZMAT2	-0.350873	1.00985e-05	0.000117361	0.0835048
ENSG00000112282	MED23	-0.346161	1.02227e-05	0.000118726	0.0820297
ENSG00000187531	SIRT7	0.375408	1.03565e-05	0.000120202	0.0894493
ENSG00000122386	ZNF205	1.42801	1.04382e-05	0.00012107	0.368589
ENSG00000058600	POLR3E	0.34061	1.04989e-05	0.000121662	0.0802196
ENSG00000099625	CBARP	2.75094	1.05091e-05	0.000121662	0.899425
ENSG00000174944	P2RY14	-1.40233	1.05098e-05	0.000121662	0.385104
ENSG00000149658	YTHDF1	0.207031	1.05612e-05	0.000122178	0.0477062
ENSG00000117528	ABCD3	-0.484544	1.06056e-05	0.000122602	0.118569
ENSG00000177427	MIEF2	0.634209	1.06117e-05	0.000122602	0.157789
ENSG00000163960	UBXN7	-0.408887	1.06976e-05	0.000123514	0.0974042
ENSG00000130005	GAMT	0.897253	1.07262e-05	0.000123763	0.230925
ENSG00000097033	SH3GLB1	-0.37288	1.07435e-05	0.000123882	0.0885718
ENSG00000126217	MCF2L	0.713145	1.08255e-05	0.000124747	0.179073
ENSG00000068831	RASGRP2	0.903525	1.08409e-05	0.000124762	0.234516
ENSG00000187713	TMEM203	0.332626	1.08355e-05	0.000124762	0.078705
ENSG00000108669	CYTH1	0.262496	1.09358e-05	0.000125691	0.0608914
ENSG00000152457	DCLRE1C	-0.342113	1.09325e-05	0.000125691	0.0805684
ENSG00000167880	EVPL	1.73359	1.09752e-05	0.000126062	0.44583
ENSG00000188566	NDOR1	0.634417	1.102e-05	0.000126495	0.157761
ENSG00000178814	OPLAH	1.13451	1.11178e-05	0.000127534	0.291443
ENSG00000175467	SART1	0.422709	1.11498e-05	0.000127818	0.101559
ENSG00000177947	ODF3	2.28875	1.1215e-05	0.000128483	0.630427
ENSG00000178188	SH2B1	0.475729	1.12513e-05	0.000128815	0.115833
ENSG00000173653	RCE1	0.433199	1.12623e-05	0.000128858	0.104901
ENSG00000183283	DAZAP2	-0.32608	1.1369e-05	0.000129996	0.0772989
ENSG00000079435	LIPE	0.796904	1.14066e-05	0.00013023	0.20089
ENSG00000132361	CLUH	0.726467	1.14116e-05	0.00013023	0.188638
ENSG00000164815	ORC5	-0.500929	1.14101e-05	0.00013023	0.12417
ENSG00000197386	HTT	0.221512	1.14763e-05	0.000130884	0.0512884
ENSG00000149927	DOC2A	1.96241	1.15753e-05	0.000131929	0.576397
ENSG00000177374	HIC1	1.2058	1.15972e-05	0.000132094	0.328304
ENSG00000174231	PRPF8	-0.176159	1.16186e-05	0.000132252	0.0412156
ENSG00000118804	STBD1	1.29225	1.16682e-05	0.000132732	0.344471
ENSG00000149600	COMMD7	-0.329672	1.17634e-05	0.000133729	0.0786976
ENSG00000183496	MEX3B	0.843309	1.18234e-05	0.000134325	0.220103
ENSG00000115128	SF3B6	-0.376444	1.19148e-05	0.000135276	0.0908734
ENSG00000087053	MTMR2	-0.367334	1.20768e-05	0.000137027	0.088703
ENSG00000114383	TUSC2	0.433912	1.21151e-05	0.000137302	0.106211
ENSG00000116151	MORN1	0.713265	1.21164e-05	0.000137302	0.179668
ENSG00000068137	PLEKHH3	1.27271	1.21465e-05	0.000137554	0.330444
ENSG00000175197	DDIT3	-0.470582	1.21568e-05	0.000137583	0.115244
ENSG00000168071	CCDC88B	0.711021	1.21791e-05	0.000137748	0.180395
ENSG00000114125	RNF7	-0.388313	1.22004e-05	0.000137901	0.0941896
ENSG00000131591	C1orf159	0.745058	1.22771e-05	0.000138679	0.18914
ENSG00000117133	RPF1	-0.39404	1.23145e-05	0.000139012	0.0955959
ENSG00000168152	THAP9	-0.526565	1.23545e-05	0.000139376	0.130737
ENSG00000130311	DDA1	0.424227	1.24175e-05	0.000139997	0.102332
ENSG00000175216	CKAP5	-0.292831	1.24885e-05	0.000140707	0.0690514
ENSG00000102910	LONP2	-0.305449	1.2645e-05	0.000142381	0.0726398
ENSG00000188428	BLOC1S5	-0.386736	1.267e-05	0.000142572	0.0928783
ENSG00000160282	FTCD	1.40439	1.28173e-05	0.000144137	0.387014
ENSG00000183495	EP400	0.306114	1.28857e-05	0.000144815	0.0722506
ENSG00000171163	ZNF692	0.511482	1.29009e-05	0.000144894	0.123765
ENSG00000086506	HBQ1	2.35949	1.2961e-05	0.000145477	0.630708
ENSG00000185104	FAF1	-0.287824	1.30459e-05	0.000146338	0.0680094
ENSG00000169733	RFNG	0.513281	1.30985e-05	0.000146834	0.127759
ENSG00000266232	MIR3178	2.25781	1.31579e-05	0.000147407	0.590494
ENSG00000065154	OAT	-0.285076	1.32215e-05	0.000148025	0.0678878
ENSG00000113522	RAD50	0.612891	1.32898e-05	0.000148696	0.153199
ENSG00000095906	NUBP2	0.757136	1.33663e-05	0.0001491	0.196463
ENSG00000100711	ZFYVE21	0.439009	1.33578e-05	0.0001491	0.107359
ENSG00000115592	PRKAG3	1.51702	1.33358e-05	0.0001491	0.396742
ENSG00000140598	EFL1	-0.478463	1.33434e-05	0.0001491	0.117292
ENSG00000159692	CTBP1	0.537308	1.3368e-05	0.0001491	0.132799
ENSG00000178927	CYBC1	0.408415	1.33894e-05	0.000149245	0.0982417
ENSG00000123607	TTC21B	-0.340888	1.33992e-05	0.00014926	0.0820614
ENSG00000004779	NDUFAB1	0.307341	1.34775e-05	0.000150039	0.0731254
ENSG00000053770	AP5M1	-0.290755	1.35023e-05	0.000150127	0.0690452
ENSG00000228594	FNDC10	1.12006	1.34998e-05	0.000150127	0.299936
ENSG00000126005	MMP24OS	0.602022	1.37234e-05	0.000152488	0.149041
ENSG00000135723	FHOD1	0.549526	1.38371e-05	0.000153656	0.136572
ENSG00000006118	TMEM132A	1.2782	1.38726e-05	0.000153902	0.358104
ENSG00000104884	ERCC2	0.486171	1.38766e-05	0.000153902	0.119196
ENSG00000156858	PRR14	0.491474	1.39021e-05	0.000154089	0.120496
ENSG00000135049	AGTPBP1	-0.403191	1.42426e-05	0.000157763	0.0986728
ENSG00000135040	NAA35	-0.294964	1.42826e-05	0.000158107	0.0701848
ENSG00000164609	SLU7	-0.411126	1.43296e-05	0.00015853	0.100579
ENSG00000204394	VARS1	0.482241	1.44858e-05	0.000160157	0.11967
ENSG00000128534	LSM8	-0.250978	1.49325e-05	0.000164993	0.0597369
ENSG00000132613	MTSS2	1.50231	1.49729e-05	0.000165336	0.404209
ENSG00000186654	PRR5	0.895535	1.50623e-05	0.00016622	0.238148
ENSG00000160633	SAFB	0.378399	1.51006e-05	0.000166539	0.0917562
ENSG00000185085	INTS5	0.577604	1.51404e-05	0.000166873	0.144665
ENSG00000117697	NSL1	-0.314576	1.52036e-05	0.000167467	0.0754257
ENSG00000100815	TRIP11	-0.376983	1.52587e-05	0.000167969	0.0908841
ENSG00000148688	RPP30	-0.306515	1.54775e-05	0.000170272	0.0740548
ENSG00000070501	POLB	-0.463596	1.55678e-05	0.000170946	0.114808
ENSG00000099822	HCN2	1.24576	1.55646e-05	0.000170946	0.340735
ENSG00000171604	CXXC5	1.02979	1.55528e-05	0.000170946	0.272115
ENSG00000143158	MPC2	-0.430021	1.56758e-05	0.000172026	0.106988
ENSG00000114626	ABTB1	0.468369	1.57532e-05	0.000172661	0.116255
ENSG00000160404	TOR2A	0.50192	1.575e-05	0.000172661	0.124786
ENSG00000285868		1.43545	1.5859e-05	0.000173714	0.388197
ENSG00000161031	PGLYRP2	1.23262	1.58946e-05	0.000173889	0.3322
ENSG00000278619	MRM1	0.80757	1.58873e-05	0.000173889	0.211114
ENSG00000104883	PEX11G	1.31749	1.60652e-05	0.000175323	0.353695
ENSG00000106330	MOSPD3	0.774399	1.60588e-05	0.000175323	0.201186
ENSG00000140326	CDAN1	0.509068	1.60459e-05	0.000175323	0.125756
ENSG00000174885	NLRP6	1.07875	1.60546e-05	0.000175323	0.282089
ENSG00000169710	FASN	0.814826	1.62072e-05	0.000176763	0.216056
ENSG00000090581	GNPTG	0.516135	1.63047e-05	0.000177717	0.129782
ENSG00000134109	EDEM1	-0.412667	1.63325e-05	0.000177911	0.102221
ENSG00000124067	SLC12A4	0.397926	1.63527e-05	0.000178021	0.0962296
ENSG00000108465	CDK5RAP3	0.37017	1.64245e-05	0.000178693	0.0891908
ENSG00000125970	RALY	0.326323	1.65723e-05	0.000180191	0.0792174
ENSG00000131966	ACTR10	-0.338263	1.68437e-05	0.000183029	0.0818622
ENSG00000128886	ELL3	1.38399	1.69968e-05	0.000184579	0.375252
ENSG00000164758	MED30	0.436919	1.70109e-05	0.00018462	0.108163
ENSG00000140691	ARMC5	0.728949	1.7047e-05	0.000184898	0.195027
ENSG00000198816	ZNF358	0.891417	1.70946e-05	0.000185301	0.237276
ENSG00000197774	EME2	0.59135	1.71305e-05	0.000185577	0.150077
ENSG00000132383	RPA1	-0.236566	1.7209e-05	0.000186199	0.0568615
ENSG00000181090	EHMT1	0.484135	1.72044e-05	0.000186199	0.118574
ENSG00000158828	PINK1	0.572199	1.74207e-05	0.000188375	0.145249
ENSG00000104231	ZFAND1	-0.409517	1.74525e-05	0.000188605	0.101279
ENSG00000127720	METTL25	-0.464488	1.74877e-05	0.00018887	0.116452
ENSG00000146067	FAM193B	0.529239	1.75152e-05	0.000189051	0.132832
ENSG00000184470	TXNRD2	0.47379	1.76225e-05	0.000190093	0.120265
ENSG00000089351	GRAMD1A	0.799765	1.77237e-05	0.000191068	0.211359
ENSG00000133243	BTBD2	0.718386	1.77762e-05	0.000191519	0.185174
ENSG00000086827	ZW10	-0.307914	1.77984e-05	0.000191641	0.0747277
ENSG00000102699	PARP4	-0.526449	1.78757e-05	0.000192356	0.132356
ENSG00000188994	ZNF292	-0.307453	1.79021e-05	0.000192524	0.0734795
ENSG00000153113	CAST	-0.37688	1.7956e-05	0.000192986	0.0918467
ENSG00000115750	TAF1B	-0.498279	1.80169e-05	0.000193523	0.125964
ENSG00000099991	CABIN1	0.448094	1.809e-05	0.000194074	0.111731
ENSG00000112249	ASCC3	-0.563303	1.80837e-05	0.000194074	0.144434
ENSG00000100916	BRMS1L	-0.45273	1.82013e-05	0.000194796	0.113183
ENSG00000112305	SMAP1	0.42269	1.81718e-05	0.000194796	0.103872
ENSG00000135722	FBXL8	0.768653	1.81974e-05	0.000194796	0.203776
ENSG00000168228	ZCCHC4	-0.404169	1.81943e-05	0.000194796	0.100002
ENSG00000171150	SOCS5	-0.243194	1.82294e-05	0.000194978	0.0580129
ENSG00000145907	G3BP1	-0.337898	1.82846e-05	0.000195451	0.0809377
ENSG00000177119	ANO6	-0.482161	1.83593e-05	0.000196131	0.120766
ENSG00000166819	PLIN1	0.788156	1.83723e-05	0.000196152	0.207395
ENSG00000070950	RAD18	-0.350723	1.84276e-05	0.000196624	0.0857391
ENSG00000140988	RPS2	0.583633	1.84695e-05	0.000196953	0.149747
ENSG00000157350	ST3GAL2	0.518701	1.85086e-05	0.000197251	0.129418
ENSG00000160957	RECQL4	0.803116	1.86155e-05	0.000198271	0.216942
ENSG00000005700	IBTK	-0.415146	1.86732e-05	0.000198409	0.103003
ENSG00000070731	ST6GALNAC2	1.00022	1.86553e-05	0.000198409	0.270535
ENSG00000138190	EXOC6	-0.519882	1.86637e-05	0.000198409	0.131931
ENSG00000151445	VIPAS39	-0.307515	1.86665e-05	0.000198409	0.0740496
ENSG00000085644	ZNF213	0.673816	1.86982e-05	0.000198555	0.175478
ENSG00000100241	SBF1	0.70808	1.87748e-05	0.000199249	0.183671
ENSG00000164830	OXR1	-0.344256	1.88443e-05	0.000199867	0.084354
ENSG00000099203	TMED1	0.546608	1.88905e-05	0.000200237	0.139554
ENSG00000176208	ATAD5	-0.354731	1.91088e-05	0.00020243	0.0865883
ENSG00000156860	FBRS	0.662485	1.91803e-05	0.000203066	0.169912
ENSG00000064547	LPAR2	0.579308	1.92075e-05	0.000203233	0.148837
ENSG00000162819	BROX	-0.423761	1.9319e-05	0.000204291	0.10609
ENSG00000085274	MYNN	-0.326815	1.93457e-05	0.000204329	0.0793363
ENSG00000115020	PIKFYVE	-0.343701	1.93368e-05	0.000204329	0.0846092
ENSG00000129518	EAPP	-0.355226	1.93719e-05	0.000204484	0.0881374
ENSG00000100242	SUN2	0.525604	1.94289e-05	0.000204963	0.133858
ENSG00000186603	HPDL	1.08952	1.95863e-05	0.000206501	0.31124
ENSG00000186376	ZNF75D	-0.302455	1.98629e-05	0.000209293	0.0737725
ENSG00000182544	MFSD5	0.290396	2.00085e-05	0.000210701	0.0700405
ENSG00000163629	PTPN13	-1.11147	2.01246e-05	0.00021176	0.334618
ENSG00000224650	IGHV3-74	1.27931	2.01329e-05	0.00021176	0.339966
ENSG00000136367	ZFHX2	0.81781	2.04296e-05	0.000214625	0.215751
ENSG00000178718	RPP25	0.691492	2.04254e-05	0.000214625	0.182815
ENSG00000183354	KIAA2026	-0.342065	2.04464e-05	0.000214675	0.0833091
ENSG00000130726	TRIM28	0.388831	2.04627e-05	0.000214719	0.0967891
ENSG00000175582	RAB6A	-0.346097	2.04852e-05	0.000214828	0.084541
ENSG00000211770	TRBJ2-6	1.33469	2.05688e-05	0.000215577	0.377032
ENSG00000105325	FZR1	0.699255	2.05896e-05	0.000215667	0.184573
ENSG00000114166	KAT2B	-0.451936	2.0618e-05	0.000215837	0.113466
ENSG00000101200	AVP	2.0684	2.07625e-05	0.000217222	0.568895
ENSG00000104808	DHDH	1.18711	2.08718e-05	0.000218237	0.333837
ENSG00000104903	LYL1	1.11145	2.10588e-05	0.000220062	0.312959
ENSG00000142233	NTN5	0.995184	2.13537e-05	0.000223013	0.270733
ENSG00000163975	MELTF	1.38234	2.14215e-05	0.000223588	0.382445
ENSG00000146540	C7orf50	0.724558	2.14817e-05	0.000224085	0.190049
ENSG00000174721	FGFBP3	0.607588	2.16117e-05	0.000225309	0.157377
ENSG00000112739	PRPF4B	-0.226861	2.21103e-05	0.00023037	0.0545243
ENSG00000009413	REV3L	-0.378023	2.2195e-05	0.000231091	0.0939152
ENSG00000165915	SLC39A13	0.530704	2.22055e-05	0.000231091	0.136466
ENSG00000099910	KLHL22	0.406136	2.22315e-05	0.000231226	0.101224
ENSG00000111707	SUDS3	-0.274923	2.22909e-05	0.000231708	0.0664887
ENSG00000066933	MYO9A	-0.275421	2.24197e-05	0.00023291	0.0666383
ENSG00000136870	ZNF189	-0.342078	2.25258e-05	0.000233876	0.0844449
ENSG00000175309	PHYKPL	0.342932	2.26516e-05	0.000235043	0.0844266
ENSG00000120837	NFYB	-0.336149	2.26902e-05	0.000235306	0.0831315
ENSG00000215041	NEURL4	0.487298	2.2723e-05	0.000235508	0.123355
ENSG00000196466	ZNF799	-0.438907	2.28013e-05	0.000236182	0.110468
ENSG00000186625	KATNA1	-0.323574	2.29529e-05	0.000237614	0.0798471
ENSG00000172985	SH3RF3	1.09214	2.2982e-05	0.0002377	0.299997
ENSG00000205339	IPO7	-0.256271	2.29881e-05	0.0002377	0.0623897
ENSG00000129515	SNX6	-0.414914	2.32519e-05	0.000240287	0.103838
ENSG00000157349	DDX19B	-0.415657	2.34189e-05	0.000241873	0.105756
ENSG00000141551	CSNK1D	0.315367	2.35434e-05	0.000243017	0.0770536
ENSG00000140474	ULK3	0.454034	2.35662e-05	0.00024311	0.115756
ENSG00000107897	ACBD5	-0.360271	2.36314e-05	0.000243642	0.0899102
ENSG00000160323	ADAMTS13	0.924453	2.38744e-05	0.000246003	0.24827
ENSG00000111670	GNPTAB	-0.394667	2.40175e-05	0.000247334	0.098262
ENSG00000115825	PRKD3	-0.4617	2.40405e-05	0.000247428	0.11931
ENSG00000138593	SECISBP2L	-0.28711	2.40671e-05	0.000247558	0.0700126
ENSG00000183751	TBL3	0.574241	2.41579e-05	0.000248347	0.147841
ENSG00000154305	MIA3	-0.333334	2.41932e-05	0.000248566	0.0821755
ENSG00000134463	ECHDC3	0.583247	2.42374e-05	0.000248875	0.151479
ENSG00000211456	SACM1L	-0.350842	2.42881e-05	0.000249252	0.0866645
ENSG00000005889	ZFX	-0.20157	2.44049e-05	0.000250305	0.0486052
ENSG00000088881	EBF4	0.859339	2.44964e-05	0.000251099	0.233804
ENSG00000051596	THOC3	0.657135	2.45114e-05	0.000251108	0.172674
ENSG00000175105	ZNF654	-0.449466	2.46753e-05	0.00025264	0.113232
ENSG00000162729	IGSF8	0.682755	2.47503e-05	0.000253262	0.180912
ENSG00000115317	HTRA2	0.449482	2.48487e-05	0.000254122	0.11341
ENSG00000275342	PRAG1	0.81756	2.49194e-05	0.000254698	0.223036
ENSG00000072786	STK10	0.2002	2.50031e-05	0.000255406	0.0483985
ENSG00000100299	ARSA	0.5836	2.51279e-05	0.000256472	0.150866
ENSG00000182621	PLCB1	-0.605661	2.51364e-05	0.000256472	0.158725
ENSG00000155868	MED7	-0.281101	2.53127e-05	0.000258122	0.0689181
ENSG00000198792	TMEM184B	0.511621	2.53446e-05	0.0002583	0.133348
ENSG00000176390	CRLF3	-0.32831	2.53783e-05	0.000258494	0.0809813
ENSG00000211460	TSN	-0.309878	2.5475e-05	0.00025933	0.0770244
ENSG00000245848	CEBPA	1.32558	2.55579e-05	0.000260024	0.407946
ENSG00000174780	SRP72	-0.404589	2.57607e-05	0.000261937	0.103273
ENSG00000072364	AFF4	-0.355011	2.57829e-05	0.000261962	0.0865685
ENSG00000233954	UQCRHL	-0.650494	2.57927e-05	0.000261962	0.17307
ENSG00000163466	ARPC2	-0.351289	2.59473e-05	0.000263382	0.0865727
ENSG00000079387	SENP1	-0.499656	2.60349e-05	0.000264119	0.130741
ENSG00000093183	SEC22C	-0.219491	2.62139e-05	0.000265784	0.0533737
ENSG00000205937	RNPS1	0.283473	2.62514e-05	0.000266011	0.0706995
ENSG00000171100	MTM1	-0.318282	2.63211e-05	0.000266565	0.0785428
ENSG00000168159	RNF187	0.428256	2.63714e-05	0.000266922	0.109287
ENSG00000109971	HSPA8	-0.432675	2.64838e-05	0.000267907	0.109536
ENSG00000131724	IL13RA1	-0.679071	2.69089e-05	0.000272051	0.184969
ENSG00000247596	TWF2	0.608315	2.70721e-05	0.000273545	0.162308
ENSG00000167637	ZNF283	-0.424563	2.71294e-05	0.000273968	0.107048
ENSG00000168303	MPLKIP	0.35232	2.7147e-05	0.00027399	0.0884412
ENSG00000104756	KCTD9	-0.354149	2.74205e-05	0.000276435	0.0876825
ENSG00000163867	ZMYM6	-0.328349	2.74056e-05	0.000276435	0.0817195
ENSG00000054118	THRAP3	-0.277007	2.74638e-05	0.000276715	0.06769
ENSG00000181638	ZFP41	0.617553	2.77531e-05	0.00027947	0.164
ENSG00000126705	AHDC1	0.87901	2.78213e-05	0.000279998	0.236621
ENSG00000131115	ZNF227	-0.416019	2.79779e-05	0.000281415	0.106261
ENSG00000164134	NAA15	-0.427371	2.80308e-05	0.000281786	0.110086
ENSG00000164691	TAGAP	-0.572314	2.83626e-05	0.000284961	0.149907
ENSG00000075539	FRYL	-0.312697	2.85992e-05	0.000287175	0.0773712
ENSG00000182670	TTC3	-0.29785	2.87404e-05	0.000288429	0.0745054
ENSG00000162804	SNED1	0.755226	2.89538e-05	0.000290406	0.199742
ENSG00000118939	UCHL3	-1.37682	2.92471e-05	0.000293183	0.388248
ENSG00000125967	NECAB3	0.735218	2.94243e-05	0.000294792	0.198686
ENSG00000168140	VASN	0.682948	2.94888e-05	0.000295271	0.183401
ENSG00000141854	MISP3	0.944034	2.9737e-05	0.000297588	0.260436
ENSG00000008838	MED24	0.309497	3.00296e-05	0.000300346	0.0766687
ENSG00000105669	COPE	0.537807	3.0106e-05	0.000300941	0.141649
ENSG00000224420	ADM5	1.0742	3.0199e-05	0.0003017	0.296757
ENSG00000113580	NR3C1	-0.538836	3.03778e-05	0.000303316	0.142563
ENSG00000116525	TRIM62	0.364554	3.04299e-05	0.000303665	0.0917015
ENSG00000173327	MAP3K11	0.725042	3.10274e-05	0.000309454	0.194681
ENSG00000136874	STX17	-0.459548	3.13678e-05	0.000312672	0.11839
ENSG00000147133	TAF1	-0.271643	3.1625e-05	0.000315059	0.0671651
ENSG00000288558	DUS4L-BCAP29	-0.546854	3.18977e-05	0.000317598	0.144492
ENSG00000100053	CRYBB3	0.61977	3.21171e-05	0.000319602	0.308233
ENSG00000160716	CHRNB2	1.87247	3.23795e-05	0.000322033	0.523501
ENSG00000101189	MRGBP	0.357469	3.25042e-05	0.000322814	0.0904598
ENSG00000108840	HDAC5	0.583431	3.24801e-05	0.000322814	0.154551
ENSG00000174136	RGMB	0.784516	3.25127e-05	0.000322814	0.212989
ENSG00000117592	PRDX6	-0.264602	3.26454e-05	0.000323769	0.0652884
ENSG00000196923	PDLIM7	1.08841	3.26428e-05	0.000323769	0.302597
ENSG00000133794	BMAL1	-0.447817	3.27094e-05	0.000324221	0.115597
ENSG00000113328	CCNG1	-0.427288	3.31488e-05	0.000328027	0.110296
ENSG00000113384	GOLPH3	-0.231884	3.31385e-05	0.000328027	0.0570248
ENSG00000265491	RNF115	-0.349726	3.31238e-05	0.000328027	0.0879726
ENSG00000131067	GGT7	0.481897	3.32124e-05	0.000328473	0.125478
ENSG00000166965	RCCD1	0.69556	3.33439e-05	0.00032959	0.189054
ENSG00000196664	TLR7	-1.66625	3.3634e-05	0.000332272	0.511876
ENSG00000140983	RHOT2	0.62606	3.36728e-05	0.000332469	0.169024
ENSG00000177383	MAGEF1	0.615344	3.38223e-05	0.000333746	0.164521
ENSG00000185347	TEDC1	0.698777	3.38397e-05	0.000333746	0.192907
ENSG00000185800	DMWD	0.754305	3.41292e-05	0.000336414	0.207504
ENSG00000196419	XRCC6	-0.22382	3.41551e-05	0.000336482	0.0553832
ENSG00000145945	FAM50B	0.899391	3.43237e-05	0.000337955	0.252902
ENSG00000203326	ZNF525	-0.33378	3.45281e-05	0.000339779	0.0841835
ENSG00000066654	THUMPD1	-0.378552	3.45968e-05	0.000340266	0.097366
ENSG00000152234	ATP5F1A	-0.302376	3.50013e-05	0.000344053	0.0766702
ENSG00000213380	COG8	0.2818	3.51131e-05	0.000344961	0.0701737
ENSG00000128185	DGCR6L	0.704652	3.5272e-05	0.00034633	0.197076
ENSG00000132004	FBXW9	0.699649	3.52989e-05	0.000346402	0.190664
ENSG00000135052	GOLM1	-0.647262	3.54342e-05	0.000347537	0.175571
ENSG00000138688	BLTP1	-0.336775	3.5596e-05	0.000348931	0.0843965
ENSG00000151304	SRFBP1	-0.408204	3.56661e-05	0.000349425	0.105547
ENSG00000197021	EOLA2	0.272753	3.57615e-05	0.000350166	0.068118
ENSG00000100379	KCTD17	0.431997	3.58776e-05	0.000350968	0.111771
ENSG00000253958	CLDN23	1.78428	3.5883e-05	0.000350968	0.499088
ENSG00000163412	EIF4E3	-0.620419	3.59532e-05	0.000351461	0.169209
ENSG00000086589	RBM22	-0.259243	3.6001e-05	0.000351734	0.0649053
ENSG00000183779	ZNF703	1.30721	3.60246e-05	0.00035177	0.368442
ENSG00000124209	RAB22A	-0.333216	3.61203e-05	0.000352511	0.0847177
ENSG00000067704	IARS2	-0.28792	3.62368e-05	0.000353454	0.072436
ENSG00000176095	IP6K1	0.224991	3.63092e-05	0.000353965	0.0554821
ENSG00000115866	DARS1	-0.421759	3.63442e-05	0.000354111	0.11024
ENSG00000128989	ARPP19	-0.36515	3.66082e-05	0.000356487	0.0941076
ENSG00000185477	GPRIN3	-0.439819	3.71167e-05	0.000361241	0.114992
ENSG00000130764	LRRC47	0.384284	3.71811e-05	0.00036161	0.0983579
ENSG00000174842	GLMN	-0.498972	3.72159e-05	0.00036161	0.132042
ENSG00000176563	CNTD1	-0.641845	3.72027e-05	0.00036161	0.174926
ENSG00000175662	TOM1L2	0.369503	3.76453e-05	0.000365583	0.0941316
ENSG00000141526	SLC16A3	0.994815	3.77882e-05	0.000366769	0.283001
ENSG00000198712	MT-CO2	-0.347434	3.78252e-05	0.000366927	0.0886499
ENSG00000111540	RAB5B	-0.213598	3.78607e-05	0.000367071	0.0527962
ENSG00000154358	OBSCN	0.844209	3.7951e-05	0.000367745	0.234441
ENSG00000169641	LUZP1	-0.458087	3.79955e-05	0.000367975	0.119429
ENSG00000119541	VPS4B	-0.237569	3.80755e-05	0.000368548	0.0593442
ENSG00000066777	ARFGEF1	-0.261605	3.83666e-05	0.000371163	0.0655873
ENSG00000168878	SFTPB	0.424111	3.85808e-05	0.000372828	0.512409
ENSG00000176444	CLK2	0.262174	3.85801e-05	0.000372828	0.0653644
ENSG00000114767	RRP9	0.499079	3.87094e-05	0.000373867	0.133369
ENSG00000134697	GNL2	-0.295259	3.87503e-05	0.000374059	0.0744084
ENSG00000131845	ZNF304	-0.377191	3.8805e-05	0.000374179	0.0965162
ENSG00000181029	TRAPPC5	1.11756	3.87935e-05	0.000374179	0.326311
ENSG00000169951	ZNF764	0.573032	3.89164e-05	0.000375049	0.15564
ENSG00000138785	INTS12	-0.429318	3.89498e-05	0.000375167	0.111312
ENSG00000134014	ELP3	-0.354748	3.90355e-05	0.000375788	0.090769
ENSG00000124802	EEF1E1	-0.486607	3.90969e-05	0.000375971	0.12869
ENSG00000152061	RABGAP1L	-0.463446	3.90813e-05	0.000375971	0.122905
ENSG00000111581	NUP107	-0.383942	3.92344e-05	0.000377089	0.0999025
ENSG00000168958	MFF	-0.249006	3.93722e-05	0.000378208	0.062082
ENSG00000165512	ZNF22	-0.376605	3.95661e-05	0.000379659	0.0973432
ENSG00000178038	ALS2CL	0.653606	3.95496e-05	0.000379659	0.178652
ENSG00000038219	BOD1L1	-0.267306	3.95914e-05	0.000379697	0.066724
ENSG00000182903	ZNF721	-0.457943	3.9692e-05	0.000380249	0.120933
ENSG00000187634	SAMD11	2.94247	3.96824e-05	0.000380249	1.05574
ENSG00000176909	MAMSTR	1.02181	4.02135e-05	0.000385037	0.288295
ENSG00000129925	PGAP6	0.795699	4.02702e-05	0.000385372	0.221594
ENSG00000096872	IFT74	-0.423372	4.03269e-05	0.000385707	0.111482
ENSG00000189339	SLC35E2B	0.516791	4.06298e-05	0.000388389	0.138625
ENSG00000196712	NF1	-0.451403	4.06513e-05	0.000388389	0.118893
ENSG00000165156	ZHX1	-0.318045	4.06752e-05	0.000388397	0.0810646
ENSG00000197056	ZMYM1	-0.447057	4.06959e-05	0.000388397	0.116215
ENSG00000134717	BTF3L4	-0.419444	4.07256e-05	0.000388472	0.109959
ENSG00000130203	APOE	2.39963	4.09347e-05	0.000390256	1.26626
ENSG00000183735	TBK1	-0.483341	4.10775e-05	0.000391407	0.128735
ENSG00000240972	MIF	3.94051	4.13294e-05	0.000393596	1.26912
ENSG00000265154	MIR151B	1.77992	4.14069e-05	0.000394121	0.524246
ENSG00000050405	LIMA1	-0.471605	4.16306e-05	0.000396038	0.124966
ENSG00000116489	CAPZA1	-0.439841	4.20938e-05	0.00040023	0.117386
ENSG00000068878	PSME4	-0.415645	4.22899e-05	0.000401664	0.107981
ENSG00000116668	SWT1	-0.509175	4.22708e-05	0.000401664	0.134933
ENSG00000066422	ZBTB11	-0.364441	4.26656e-05	0.000405015	0.0942555
ENSG00000084463	WBP11	-0.256324	4.27042e-05	0.000405164	0.0645043
ENSG00000174917	MICOS13	0.467918	4.27284e-05	0.000405177	0.125133
ENSG00000179111	HES7	1.75714	4.29824e-05	0.000407368	0.522754
ENSG00000035928	RFC1	-0.404781	4.30458e-05	0.000407751	0.106153
ENSG00000071189	SNX13	-0.390468	4.32601e-05	0.000409562	0.101717
ENSG00000033030	ZCCHC8	-0.259624	4.33114e-05	0.000409828	0.0649602
ENSG00000125827	TMX4	-0.427621	4.35216e-05	0.000411378	0.112654
ENSG00000167770	OTUB1	0.280867	4.35012e-05	0.000411378	0.0711162
ENSG00000140395	SKIC8	-0.304478	4.36025e-05	0.000411923	0.078608
ENSG00000129007	CALML4	0.92849	4.37842e-05	0.000413419	0.272972
ENSG00000156603	MED19	0.559656	4.42547e-05	0.000417639	0.152805
ENSG00000204899	MZT1	0.392371	4.43495e-05	0.000418311	0.101488
ENSG00000275023	MLLT6	0.485381	4.48378e-05	0.000422691	0.128437
ENSG00000118412	CASP8AP2	-0.424358	4.49078e-05	0.000423126	0.111237
ENSG00000106591	MRPL32	-0.289973	4.50236e-05	0.00042386	0.0736947
ENSG00000174326	SLC16A11	1.45426	4.50335e-05	0.00042386	0.435424
ENSG00000126970	ZC4H2	-0.466578	4.53132e-05	0.000426266	0.123875
ENSG00000168067	MAP4K2	0.451176	4.58997e-05	0.000431555	0.119231
ENSG00000011405	PIK3C2A	-0.289586	4.59788e-05	0.000432069	0.0734964
ENSG00000069696	DRD4	1.43846	4.61081e-05	0.000433054	0.41881
ENSG00000145723	GIN1	-0.414117	4.63342e-05	0.000434948	0.108146
ENSG00000168175	MAPK1IP1L	-0.380792	4.6478e-05	0.000436066	0.0993336
ENSG00000130204	TOMM40	0.604184	4.66308e-05	0.000437268	0.169851
ENSG00000100749	VRK1	-0.349125	4.67975e-05	0.000438368	0.0907125
ENSG00000122482	ZNF644	-0.532575	4.67777e-05	0.000438368	0.147842
ENSG00000091009	RBM27	-0.46591	4.70442e-05	0.000440213	0.124151
ENSG00000198464	ZNF480	-0.523794	4.70338e-05	0.000440213	0.142579
ENSG00000157911	PEX10	0.763649	4.70822e-05	0.000440337	0.220307
ENSG00000165609	NUDT5	-0.369994	4.72647e-05	0.000441811	0.0976257
ENSG00000101745	ANKRD12	-0.547415	4.73119e-05	0.000442019	0.14853
ENSG00000185236	RAB11B	0.637074	4.73489e-05	0.000442131	0.174788
ENSG00000196187	TMEM63A	0.467272	4.75518e-05	0.000443791	0.123797
ENSG00000124172	ATP5F1E	-0.436462	4.76207e-05	0.0004442	0.117489
ENSG00000102886	GDPD3	0.56406	4.7758e-05	0.000445172	0.152431
ENSG00000176531	PHLDB3	0.713185	4.7775e-05	0.000445172	0.19815
ENSG00000163743	RCHY1	-0.322034	4.79652e-05	0.000446709	0.0830162
ENSG00000105376	ICAM5	1.26791	4.8501e-05	0.000451018	0.364089
ENSG00000164327	RICTOR	-0.406005	4.84878e-05	0.000451018	0.105487
ENSG00000167491	GATAD2A	0.369165	4.85042e-05	0.000451018	0.0955232
ENSG00000107140	TESK1	0.606581	4.88467e-05	0.000453964	0.164316
ENSG00000001561	ENPP4	-0.612697	4.9092e-05	0.000456005	0.171023
ENSG00000065548	ZC3H15	-0.32791	4.91547e-05	0.000456146	0.0849646
ENSG00000139546	TARBP2	0.373553	4.91707e-05	0.000456146	0.0984174
ENSG00000148297	MED22	0.350639	4.91844e-05	0.000456146	0.0908714
ENSG00000166166	TRMT61A	0.651459	4.93292e-05	0.00045725	0.185393
ENSG00000118816	CCNI	-0.172828	4.98057e-05	0.000461425	0.0431586
ENSG00000101439	CST3	1.16127	4.99162e-05	0.000462207	0.354858
ENSG00000173272	MZT2A	0.943341	5.01363e-05	0.000464003	0.284353
ENSG00000115504	EHBP1	-0.454785	5.05063e-05	0.000467183	0.122126
ENSG00000107164	FUBP3	0.213383	5.08342e-05	0.000469971	0.0535837
ENSG00000183023	SLC8A1	-0.787521	5.09332e-05	0.000470641	0.219581
ENSG00000111880	RNGTT	-0.279638	5.10606e-05	0.000471572	0.0709957
ENSG00000099958	DERL3	1.35789	5.12681e-05	0.000472749	0.431328
ENSG00000147854	UHRF2	-0.378691	5.12587e-05	0.000472749	0.0990296
ENSG00000185627	PSMD13	-0.293011	5.12596e-05	0.000472749	0.0757311
ENSG00000168010	ATG16L2	0.383193	5.13154e-05	0.00047294	0.099688
ENSG00000134905	CARS2	0.330004	5.15527e-05	0.00047488	0.085726
ENSG00000144848	ATG3	-0.474602	5.18498e-05	0.000477368	0.126605
ENSG00000155760	FZD7	0.796356	5.18867e-05	0.00047746	0.22598
ENSG00000090615	GOLGA3	0.215268	5.22278e-05	0.000480349	0.0537172
ENSG00000155561	NUP205	-0.342901	5.23344e-05	0.00048108	0.0888294
ENSG00000056097	ZFR	-0.293935	5.2656e-05	0.000483785	0.0744333
ENSG00000260001	TGFBR3L	1.55003	5.27342e-05	0.000484253	0.469458
ENSG00000152082	MZT2B	0.959253	5.32136e-05	0.000488402	0.28486
ENSG00000286025	FAM246C	0.997772	5.32695e-05	0.000488662	0.297546
ENSG00000073614	KDM5A	-0.270457	5.39611e-05	0.000494751	0.0686116
ENSG00000114841	DNAH1	0.355098	5.40407e-05	0.000495125	0.0921507
ENSG00000124789	NUP153	-0.445157	5.40578e-05	0.000495125	0.119124
ENSG00000183530	PRR14L	-0.32425	5.41825e-05	0.000496011	0.0833362
ENSG00000159592	GPBP1L1	-0.256088	5.42402e-05	0.000496283	0.0648537
ENSG00000165288	BRWD3	-0.318865	5.43901e-05	0.000497397	0.081947
ENSG00000100599	RIN3	0.767547	5.46362e-05	0.00049939	0.215869
ENSG00000167395	ZNF646	0.479134	5.47787e-05	0.000500435	0.129066
ENSG00000142733	MAP3K6	0.58416	5.48442e-05	0.000500775	0.160416
ENSG00000204604	ZNF468	-0.341991	5.48735e-05	0.000500784	0.0889224
ENSG00000139626	ITGB7	0.620357	5.50028e-05	0.000501706	0.169805
ENSG00000100239	PPP6R2	0.37502	5.50356e-05	0.000501747	0.0968718
ENSG00000129315	CCNT1	-0.454917	5.51091e-05	0.000502158	0.122764
ENSG00000102054	RBBP7	-0.305389	5.51694e-05	0.000502318	0.0797304
ENSG00000155959	VBP1	-0.298791	5.51833e-05	0.000502318	0.0777501
ENSG00000099968	BCL2L13	-0.238254	5.52335e-05	0.000502498	0.0603721
ENSG00000130684	ZNF337	-0.394408	5.52597e-05	0.000502498	0.104153
ENSG00000198839	ZNF277	-0.375431	5.53545e-05	0.000503101	0.0987073
ENSG00000111897	SERINC1	-0.396692	5.54548e-05	0.000503755	0.106021
ENSG00000089486	CDIP1	0.242363	5.55214e-05	0.000504101	0.0617033
ENSG00000070404	FSTL3	0.748496	5.55672e-05	0.000504259	0.21202
ENSG00000028203	VEZT	-0.308528	5.59848e-05	0.000507788	0.0798422
ENSG00000160293	VAV2	0.639138	5.60358e-05	0.000507991	0.181285
ENSG00000047365	ARAP2	-0.672078	5.61349e-05	0.000508584	0.190088
ENSG00000172172	MRPL13	-0.529551	5.61586e-05	0.000508584	0.149404
ENSG00000119787	ATL2	-0.199479	5.63465e-05	0.000510025	0.050251
ENSG00000125977	EIF2S2	-0.245804	5.64125e-05	0.000510102	0.0629836
ENSG00000173171	MTX1	0.341015	5.63938e-05	0.000510102	0.0887335
ENSG00000100399	CHADL	1.20363	5.66293e-05	0.0005118	0.359803
ENSG00000154832	CXXC1	0.389854	5.66705e-05	0.000511912	0.102652
ENSG00000125447	GGA3	0.179952	5.67436e-05	0.000512311	0.0451392
ENSG00000144048	DUSP11	-0.311516	5.701e-05	0.000514193	0.081307
ENSG00000215717	TMEM167B	-0.345097	5.69996e-05	0.000514193	0.091599
ENSG00000112245	PTP4A1	2.66176	5.73163e-05	0.000516692	0.756887
ENSG00000150527	MIA2	-0.377811	5.75101e-05	0.000518176	0.0992025
ENSG00000100353	EIF3D	-0.243406	5.78537e-05	0.000521007	0.0624117
ENSG00000173273	TNKS	-0.358345	5.82097e-05	0.000523946	0.0951215
ENSG00000090776	EFNB1	0.709311	5.86212e-05	0.000527382	0.199222
ENSG00000130827	PLXNA3	0.645976	5.87225e-05	0.000528026	0.176755
ENSG00000078668	VDAC3	-0.334686	5.88063e-05	0.000528511	0.0875962
ENSG00000135249	RINT1	-0.46676	5.90876e-05	0.000530697	0.128087
ENSG00000162623	TYW3	-0.332363	5.91094e-05	0.000530697	0.0870295
ENSG00000122035	RASL11A	0.691417	5.92128e-05	0.000531356	0.195536
ENSG00000157637	SLC38A10	0.518638	5.93191e-05	0.00053204	0.14097
ENSG00000129757	CDKN1C	1.19652	5.98115e-05	0.000536186	0.344565
ENSG00000090238	YPEL3	0.647591	6.01472e-05	0.000538923	0.18217
ENSG00000066056	TIE1	0.681253	6.01928e-05	0.000539059	0.193827
ENSG00000137876	RSL24D1	-0.392644	6.04198e-05	0.000540818	0.106177
ENSG00000122515	ZMIZ2	0.575076	6.0485e-05	0.000541129	0.156437
ENSG00000244462	RBM12	-0.233089	6.06068e-05	0.000541945	0.059708
ENSG00000118680	MYL12B	-0.392318	6.07287e-05	0.000542761	0.10553
ENSG00000084090	STARD7	-0.267682	6.08142e-05	0.000543251	0.069192
ENSG00000158406	H4C8	-0.674699	6.10589e-05	0.000545162	0.189647
ENSG00000173875	ZNF791	-0.282233	6.11367e-05	0.000545582	0.0735007
ENSG00000071051	NCK2	0.66289	6.143e-05	0.000547924	0.184128
ENSG00000137040	RANBP6	-0.380448	6.15169e-05	0.000548423	0.101093
ENSG00000213020	ZNF611	-0.444395	6.18546e-05	0.000551156	0.119643
ENSG00000173264	GPR137	0.579684	6.20021e-05	0.000552193	0.159739
ENSG00000291317	TMEM276	0.979256	6.23017e-05	0.000554583	0.293478
ENSG00000123810	B9D2	0.39686	6.26493e-05	0.000557397	0.105311
ENSG00000138378	STAT4	-0.649019	6.29025e-05	0.000559368	0.186735
ENSG00000140521	POLG	0.248853	6.3052e-05	0.000560417	0.0640693
ENSG00000176261	ZBTB8OS	-0.361711	6.31271e-05	0.000560803	0.0953576
ENSG00000152382	TADA1	-0.407089	6.36431e-05	0.000565104	0.109285
ENSG00000137656	BUD13	-0.336216	6.36815e-05	0.000565161	0.0883329
ENSG00000140299	BNIP2	-0.488599	6.3784e-05	0.000565787	0.13513
[truncated: 3,118 more rows]

## Sheet: TABLE_S6
Table S6. Differentially expressed genes in non-responder patients to fingolimod at baseline compared to healthy donors
Ensembl ID	Gene symbol	log2FC	pval	padj	lfcSE
ENSG00000228253	MT-ATP8	-3.36181	3.62879e-69	6.45343e-65	0.196901
ENSG00000101084	RAB5IF	3.55798	1.01991e-66	9.06904e-63	0.206454
ENSG00000271303	SRXN1	5.92444	2.43419e-46	1.44299e-42	0.414412
ENSG00000130748	TMEM160	3.4213	5.96303e-46	2.65116e-42	0.242566
ENSG00000168040	FADD	2.89109	2.62048e-45	9.32052e-42	0.205912
ENSG00000167136	ENDOG	3.74378	4.54534e-44	1.34724e-40	0.270013
ENSG00000166337	TAF10	1.01691	3.04981e-41	7.74827e-38	0.0764567
ENSG00000141933	TPGS1	2.20839	2.22736e-40	4.95141e-37	0.167221
ENSG00000270170	NCBP2AS2	0.991437	5.27128e-40	1.04161e-36	0.0756141
ENSG00000179965	ZNF771	1.83971	7.83538e-40	1.39344e-36	0.140775
ENSG00000272325	NUDT3	4.47942	9.17229e-40	1.48291e-36	0.34312
ENSG00000130522	JUND	2.14614	1.73106e-39	2.56543e-36	0.164527
ENSG00000182325	FBXL6	1.40823	5.83461e-39	7.98175e-36	0.108692
ENSG00000241360	PDXP	3.92499	9.89091e-39	1.25643e-35	0.30319
ENSG00000243449	C4orf48	4.23642	8.65381e-38	1.026e-34	0.335935
ENSG00000218891	ZNF579	2.30581	3.72498e-37	4.14031e-34	0.182578
ENSG00000102931	ARL2BP	4.14963	4.11154e-36	4.30115e-33	0.333358
ENSG00000135766	EGLN1	2.43189	1.78105e-35	1.75968e-32	0.197253
ENSG00000103275	UBE2I	0.606995	6.46183e-34	6.04828e-31	0.0505553
ENSG00000213563	C8orf82	1.83069	7.20029e-33	6.4025e-30	0.155298
ENSG00000168350	DEGS2	2.40262	4.41171e-32	3.73609e-29	0.207817
ENSG00000167996	FTH1	2.56572	5.17737e-31	4.1852e-28	0.223866
ENSG00000131116	ZNF428	1.899	1.02116e-30	7.89582e-28	0.166889
ENSG00000250479	CHCHD10	2.34722	3.60898e-30	2.67425e-27	0.209527
ENSG00000284286	MIR718	11.3304	5.33239e-30	3.79325e-27	2.98609
ENSG00000196976	LAGE3	1.51753	7.44663e-30	5.09349e-27	0.135415
ENSG00000224877	NDUFAF8	1.47168	8.01217e-30	5.27735e-27	0.131661
ENSG00000099624	ATP5F1D	1.6797	8.81858e-30	5.60106e-27	0.150603
ENSG00000239857	GET4	2.07591	2.65481e-29	1.62804e-26	0.18751
ENSG00000104859	CLASRP	0.903677	8.85109e-28	5.24693e-25	0.0839174
ENSG00000164754	RAD21	-0.436348	9.82783e-27	5.638e-24	0.0412382
ENSG00000161956	SENP3	0.972495	1.39884e-26	7.77408e-24	0.0924324
ENSG00000182154	MRPL41	1.97728	2.99866e-26	1.616e-23	0.188832
ENSG00000161999	JMJD8	1.28194	3.54052e-26	1.8519e-23	0.122939
ENSG00000159884	CCDC107	2.67922	7.32775e-26	3.72333e-23	0.258617
ENSG00000179922	ZNF784	1.10217	8.61971e-26	4.25814e-23	0.106788
ENSG00000165644	COMTD1	1.99756	2.20583e-25	1.06023e-22	0.195349
ENSG00000185262	UBALD2	1.47763	2.65207e-25	1.24117e-22	0.144601
ENSG00000146834	MEPCE	1.62821	5.48125e-25	2.49945e-22	0.160376
ENSG00000178951	ZBTB7A	1.34374	4.77195e-24	2.12161e-21	0.135379
ENSG00000168282	MGAT2	3.16851	6.54032e-24	2.8369e-21	0.319193
ENSG00000142544	CTU1	2.7396	9.55036e-24	4.0439e-21	0.278638
ENSG00000188486	H2AX	1.53751	1.25793e-23	5.20257e-21	0.156304
ENSG00000186222	BLOC1S4	1.07354	1.68248e-23	6.80027e-21	0.109403
ENSG00000233493	TMEM238	3.92294	2.16545e-23	8.55785e-21	0.406213
ENSG00000118007	STAG1	-0.472634	5.29874e-23	2.04854e-20	0.0485131
ENSG00000257704	INAFM1	2.06102	5.77022e-23	2.18335e-20	0.212761
ENSG00000179085	DPM3	1.46244	8.26591e-23	3.06252e-20	0.151679
ENSG00000261221	ZNF865	2.12668	1.31832e-22	4.7847e-20	0.221534
ENSG00000244486	SCARF2	1.97831	2.01357e-22	7.16188e-20	0.208473
ENSG00000075292	ZNF638	-0.634764	4.418e-22	1.54058e-19	0.066729
ENSG00000127554	GFER	1.30282	5.93745e-22	2.03061e-19	0.137811
ENSG00000257315	ZBED6	1.76632	6.21024e-22	2.08383e-19	0.189723
ENSG00000131188	PRR7	2.29002	1.34138e-21	4.4176e-19	0.245298
ENSG00000170468	RIOX1	0.973861	1.46348e-21	4.7321e-19	0.104505
ENSG00000155508	CNOT8	-0.362175	1.86196e-21	5.91305e-19	0.0383728
ENSG00000136463	TACO1	1.59	2.12308e-21	6.55342e-19	0.170806
ENSG00000205903	ZNF316	1.31173	2.13731e-21	6.55342e-19	0.140785
ENSG00000161179	YDJC	1.66954	2.54599e-21	7.67421e-19	0.179758
ENSG00000178015	GPR150	1.85104	3.51822e-21	1.0428e-18	0.201866
ENSG00000088766	CRLS1	2.29444	3.87079e-21	1.12849e-18	0.248651
ENSG00000130511	SSBP4	1.82775	5.03809e-21	1.44512e-18	0.198846
ENSG00000185950	IRS2	1.29545	5.90683e-21	1.66741e-18	0.140802
ENSG00000126453	BCL2L12	0.876109	6.42645e-21	1.78575e-18	0.0950325
ENSG00000115266	APC2	1.47302	7.68028e-21	2.10132e-18	0.16076
ENSG00000179168	GGN	2.11543	8.45214e-21	2.27747e-18	0.233278
ENSG00000160226	CFAP410	1.03228	1.03902e-20	2.75789e-18	0.112798
ENSG00000182768	NGRN	1.29222	1.50353e-20	3.93217e-18	0.142582
ENSG00000197483	ZNF628	1.97398	1.9877e-20	5.12307e-18	0.218302
ENSG00000220008	LINGO3	2.64705	2.07579e-20	5.27368e-18	0.292386
ENSG00000177733	HNRNPA0	0.844968	2.17256e-20	5.36622e-18	0.0924871
ENSG00000213638	ADAT3	3.03925	2.15334e-20	5.36622e-18	0.337818
ENSG00000107872	FBXL15	2.27062	2.60059e-20	6.33545e-18	0.252658
ENSG00000258429	PDF	5.16291	2.69583e-20	6.47872e-18	0.575736
ENSG00000213015	ZNF580	0.88696	2.92872e-20	6.94457e-18	0.0986736
ENSG00000185000	DGAT1	0.973172	3.31017e-20	7.74579e-18	0.107568
ENSG00000174586	ZNF497	2.18796	3.49427e-20	8.07041e-18	0.243193
ENSG00000123144	TRIR	1.10153	3.97216e-20	9.05652e-18	0.122273
ENSG00000177666	PNPLA2	1.0556	4.03786e-20	9.08979e-18	0.117291
ENSG00000114416	FXR1	-0.406481	4.31295e-20	9.58768e-18	0.045274
ENSG00000103266	STUB1	1.71986	8.49436e-20	1.86498e-17	0.193193
ENSG00000172780	RAB43	2.56841	9.80436e-20	2.12635e-17	0.289069
ENSG00000166454	ATMIN	-0.479477	1.10847e-19	2.37506e-17	0.0534112
ENSG00000284194	SCO2	4.08333	1.64585e-19	3.44694e-17	0.468729
ENSG00000284395	PERCC1	2.40083	1.64749e-19	3.44694e-17	0.273558
ENSG00000011304	PTBP1	0.674859	1.80494e-19	3.73244e-17	0.0766441
ENSG00000129932	DOHH	1.85223	2.7762e-19	5.67493e-17	0.211272
ENSG00000142409	ZNF787	1.81499	4.48445e-19	9.06266e-17	0.208174
ENSG00000173338	KCNK7	1.74136	4.9347e-19	9.86052e-17	0.200656
ENSG00000188375	H3-5	-1.46842	5.24892e-19	1.03719e-16	0.171284
ENSG00000197961	ZNF121	-0.762631	6.3863e-19	1.24807e-16	0.0886295
ENSG00000178149	DALRD3	0.90064	7.07976e-19	1.36855e-16	0.103674
ENSG00000184207	PGP	0.950918	7.19388e-19	1.37566e-16	0.109442
ENSG00000006015	REX1BD	1.6631	8.62494e-19	1.63177e-16	0.192735
ENSG00000260428	SCX	3.25754	9.08444e-19	1.70061e-16	0.383135
ENSG00000173153	ESRRA	1.35632	9.61818e-19	1.78177e-16	0.157006
ENSG00000165804	ZNF219	1.8063	1.06682e-18	1.9559e-16	0.209567
ENSG00000168101	NUDT16L1	1.00734	1.16174e-18	2.1082e-16	0.116351
ENSG00000008323	PLEKHG6	1.9123	1.25057e-18	2.24649e-16	0.224496
ENSG00000141873	SLC39A3	1.32906	1.27499e-18	2.26744e-16	0.154596
ENSG00000171813	PWWP2B	1.67462	1.77204e-18	3.12019e-16	0.195722
ENSG00000162959	MEMO1	1.39017	2.0468e-18	3.56866e-16	0.16264
ENSG00000065559	MAP2K4	-0.496637	3.22303e-18	5.56489e-16	0.0579334
ENSG00000161682	FAM171A2	2.87063	4.9505e-18	8.46536e-16	0.340223
ENSG00000172922	RNASEH2C	0.839386	1.0273e-17	1.73995e-15	0.100467
ENSG00000130725	UBE2M	1.05308	1.12823e-17	1.89287e-15	0.125843
ENSG00000239264	TXNDC5	3.32726	1.36968e-17	2.27649e-15	0.399677
ENSG00000163702	IL17RC	2.46472	1.56966e-17	2.5847e-15	0.297082
ENSG00000007520	TSR3	1.42795	1.61826e-17	2.64028e-15	0.171901
ENSG00000173621	LRFN4	2.38978	1.63986e-17	2.6512e-15	0.288354
ENSG00000178605	GTPBP6	0.987839	1.70933e-17	2.73862e-15	0.118835
ENSG00000131584	ACAP3	1.17886	1.74573e-17	2.77197e-15	0.142061
ENSG00000160336	ZNF761	-0.80711	1.78474e-17	2.80883e-15	0.0980536
ENSG00000167394	ZNF668	1.1863	1.94464e-17	3.03364e-15	0.143443
ENSG00000175756	AURKAIP1	1.35346	2.21407e-17	3.42392e-15	0.163501
ENSG00000123200	ZC3H13	-0.504262	2.25162e-17	3.45197e-15	0.0604626
ENSG00000178297	TMPRSS9	1.55325	2.37199e-17	3.60542e-15	0.189326
ENSG00000221869	CEBPD	2.23902	2.64734e-17	3.98986e-15	0.2724
ENSG00000112787	FBRSL1	1.46994	2.94707e-17	4.40426e-15	0.178678
ENSG00000173141	MRPL57	0.850111	2.9729e-17	4.40584e-15	0.102576
ENSG00000121741	ZMYM2	-0.590069	3.03446e-17	4.4599e-15	0.0716113
ENSG00000101940	WDR13	0.820313	4.03196e-17	5.8774e-15	0.0991107
ENSG00000102109	PCSK1N	3.61157	4.53418e-17	6.55575e-15	0.447721
ENSG00000105698	USF2	0.952175	5.40345e-17	7.7496e-15	0.11546
ENSG00000162227	TAF6L	0.915578	5.9395e-17	8.45025e-15	0.111896
ENSG00000167536	DHRS13	1.36599	6.03214e-17	8.51394e-15	0.168123
ENSG00000133250	ZNF414	1.59257	6.18777e-17	8.66483e-15	0.195956
ENSG00000163795	ZNF513	0.647715	7.34923e-17	1.02108e-14	0.079089
ENSG00000179271	GADD45GIP1	1.52593	8.25006e-17	1.13736e-14	0.187603
ENSG00000286264		1.97524	1.02297e-16	1.39943e-14	0.245895
ENSG00000103111	MON1B	0.298932	1.15624e-16	1.56966e-14	0.0363698
ENSG00000126895	AVPR2	1.50402	1.20631e-16	1.62523e-14	0.18765
ENSG00000103495	MAZ	1.08941	1.26877e-16	1.68386e-14	0.13498
ENSG00000133265	HSPBP1	1.27431	1.26287e-16	1.68386e-14	0.158396
ENSG00000104885	DOT1L	1.45294	2.19955e-16	2.89754e-14	0.181955
[truncated: 5,120 more rows]

## Sheet: TABLE_S7
Table S7. Differentially expressed genes in responder patients at 12 months of fingolimod therapy compared to healthy donors
[truncated: 9,409 more rows]

[truncated: 6 more sheets: TABLE_S8, TABLE_S9, TABLE_S10, TABLE_S11, TABLE_S12, TABLE_S13]
